# Supplementary material for: Inflammatory Cytokines That Enhance Antigen Responsiveness of Naïve CD8+ T Lymphocytes Modulate Chromatin Accessibility of Genes Impacted by Antigen Stimulation
Source: MDPI journal article supplement (doi:10.3390/ijms232214122), 2022-11-16
Supplement: s1 [file s1]

# Inflammatory cytokines that enhance antigen responsiveness of naïve CD8<sup>+</sup> T lymphocytes modulate chromatin accessibility of genes impacted by antigen stimulation

Quenum et al.,

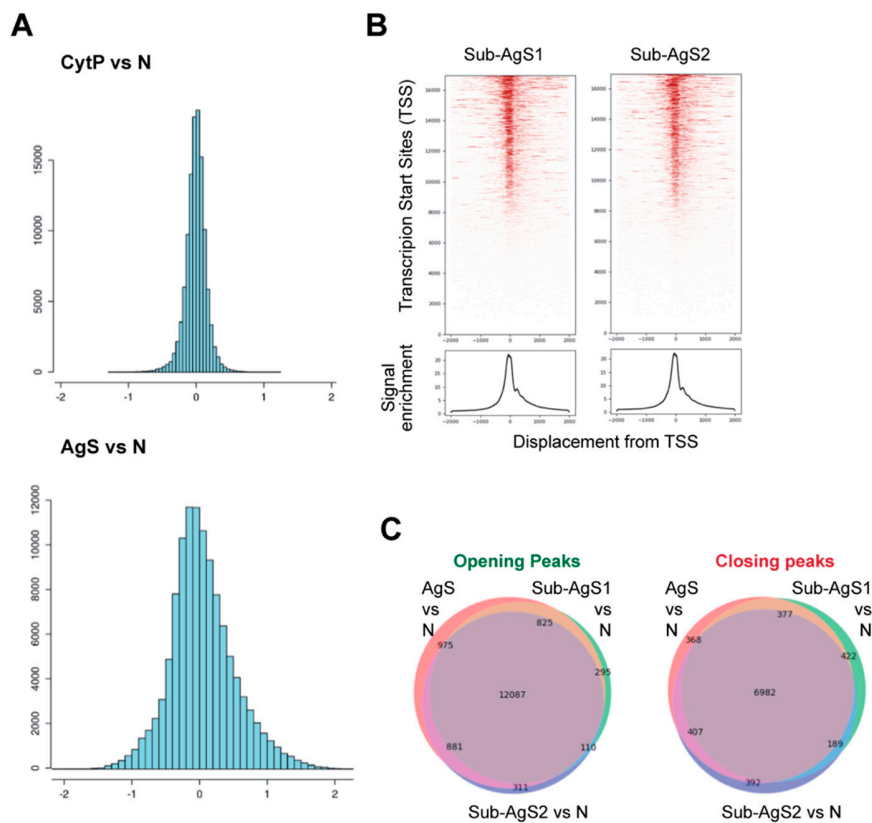

**Supplementary Figure S1.** Quality control of chromatin accessibility peaks in AgS cells. (A) Distribution of rlogFC values for comparison between CytP versus N and AgS versus N cells. (B) Fragment length distribution analysis of ATACseq reads from AgS cells randomly subgrouped to sub-AgS1 and sub-AgS2 reads. (C) Comparison of the opening and closing peaks in sub-AgS1 and sub-AgS2 ATACseq reads compared to naive cells.

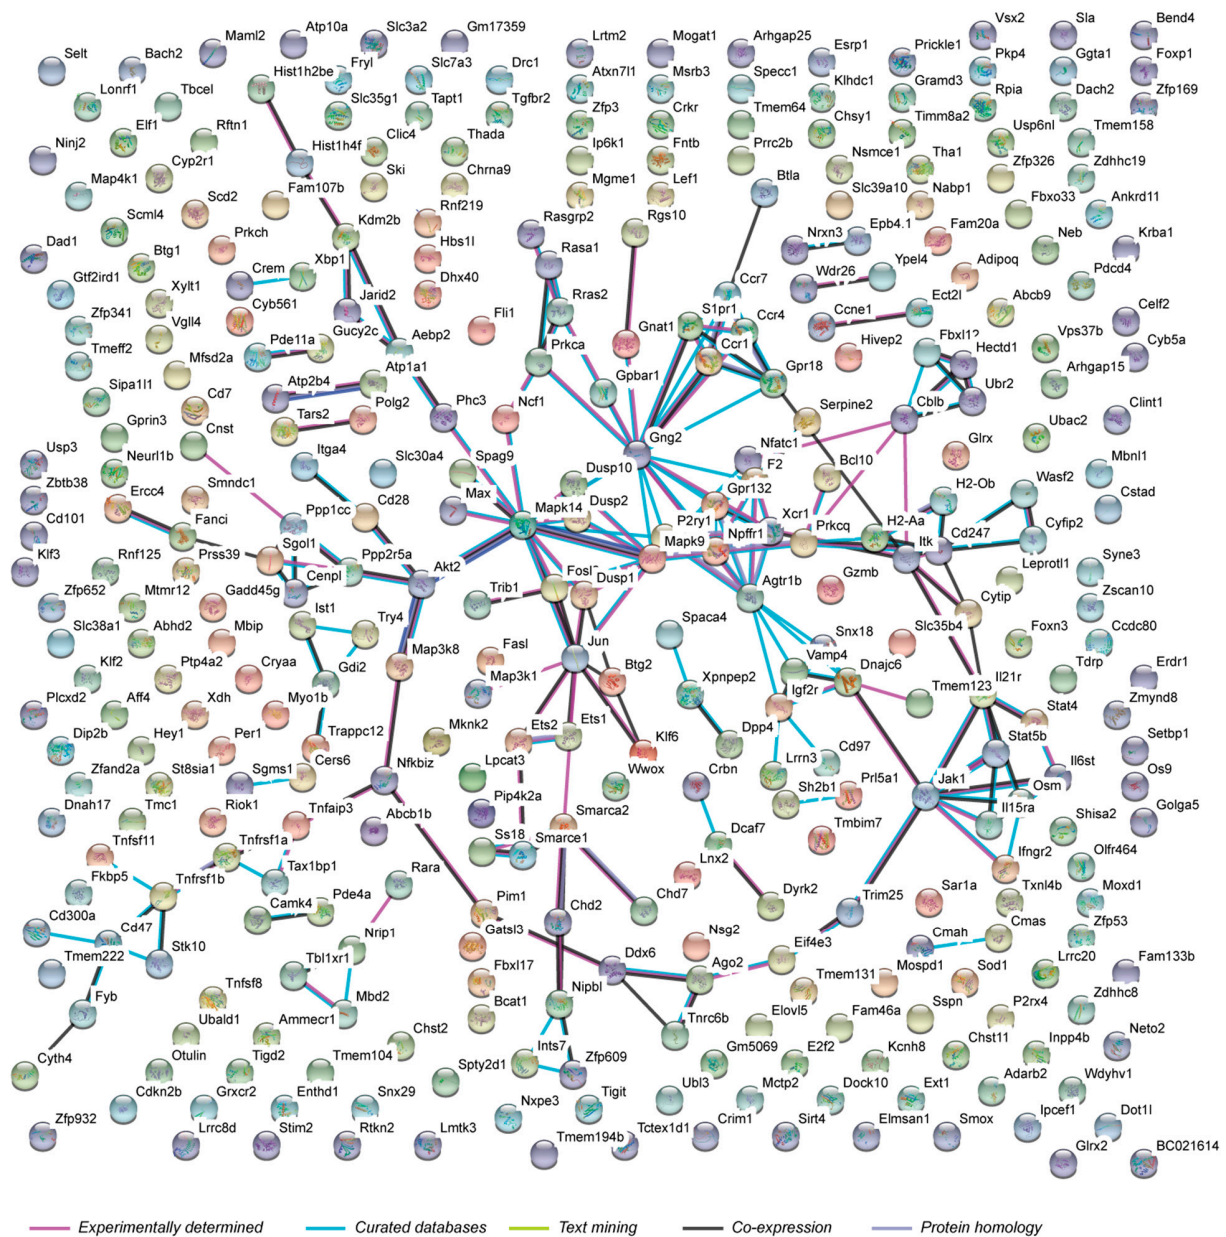

**Supplementary Figure S2.** Protein interaction network analysis of genes in the vicinity of the ATACseq peaks modulated in cytokine-primed PMEL-1 cells compared to naive cells.

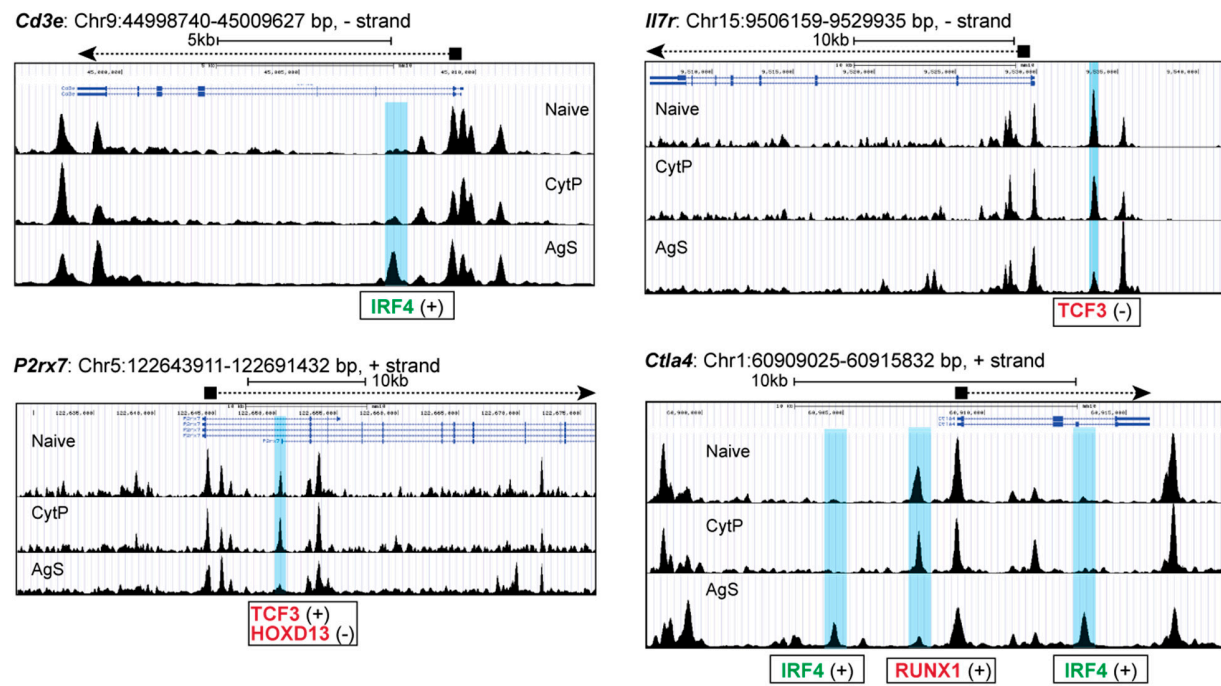

**Supplementary Figure S3.** Other examples of chromosome accessibility peaks opening (*Cd3e*), closing (*Il7ra*, *P2rx7*) or both opening and closing (*Ctla4*) in Ag-stimulated but not in cytokine-primed cells.

**A Closing Peaks in CytP & AgS cells****Stat5b**: Chr11:100780731-100850724 bp, - strand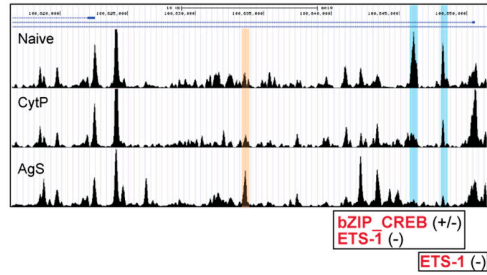**Rara**: Chr11:98927818-98974942 bp, + strand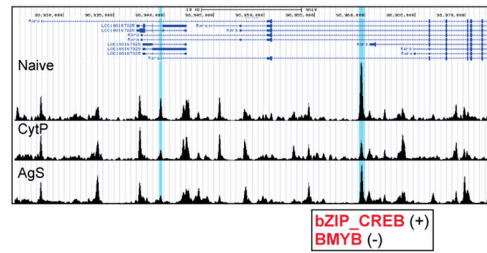**Tgfb2**: Chr9:116087695-116175363 bp, - strand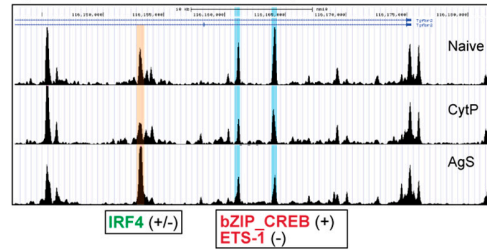**B Peaks closing only in CytP cells****Cd101**: Chr3:100993529-101029495 bp, - strand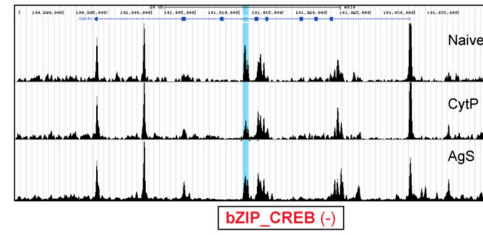**Tigit**: Chr16:43648867-43664146 bp, - strand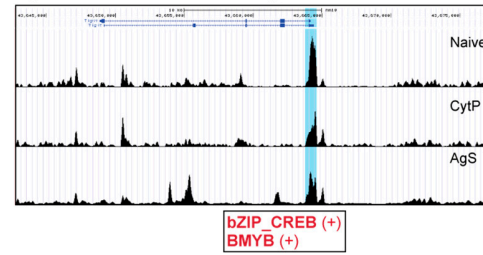**Trib1**: Chr15:59648654-59657099 bp, + strand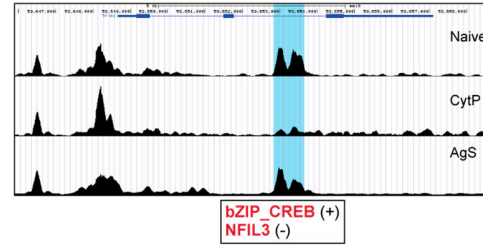**Xbp1**: Chr11:5520659-5525893 bp, + strand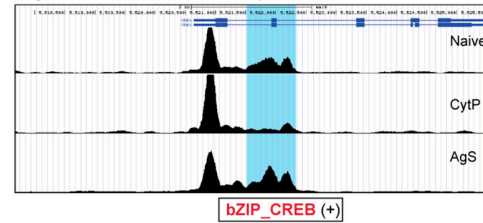

**Supplementary Figure S4.** Chromosome accessibility peaks that are closing in both CytP and in AgS cells (A) or only in AgS cells (B).

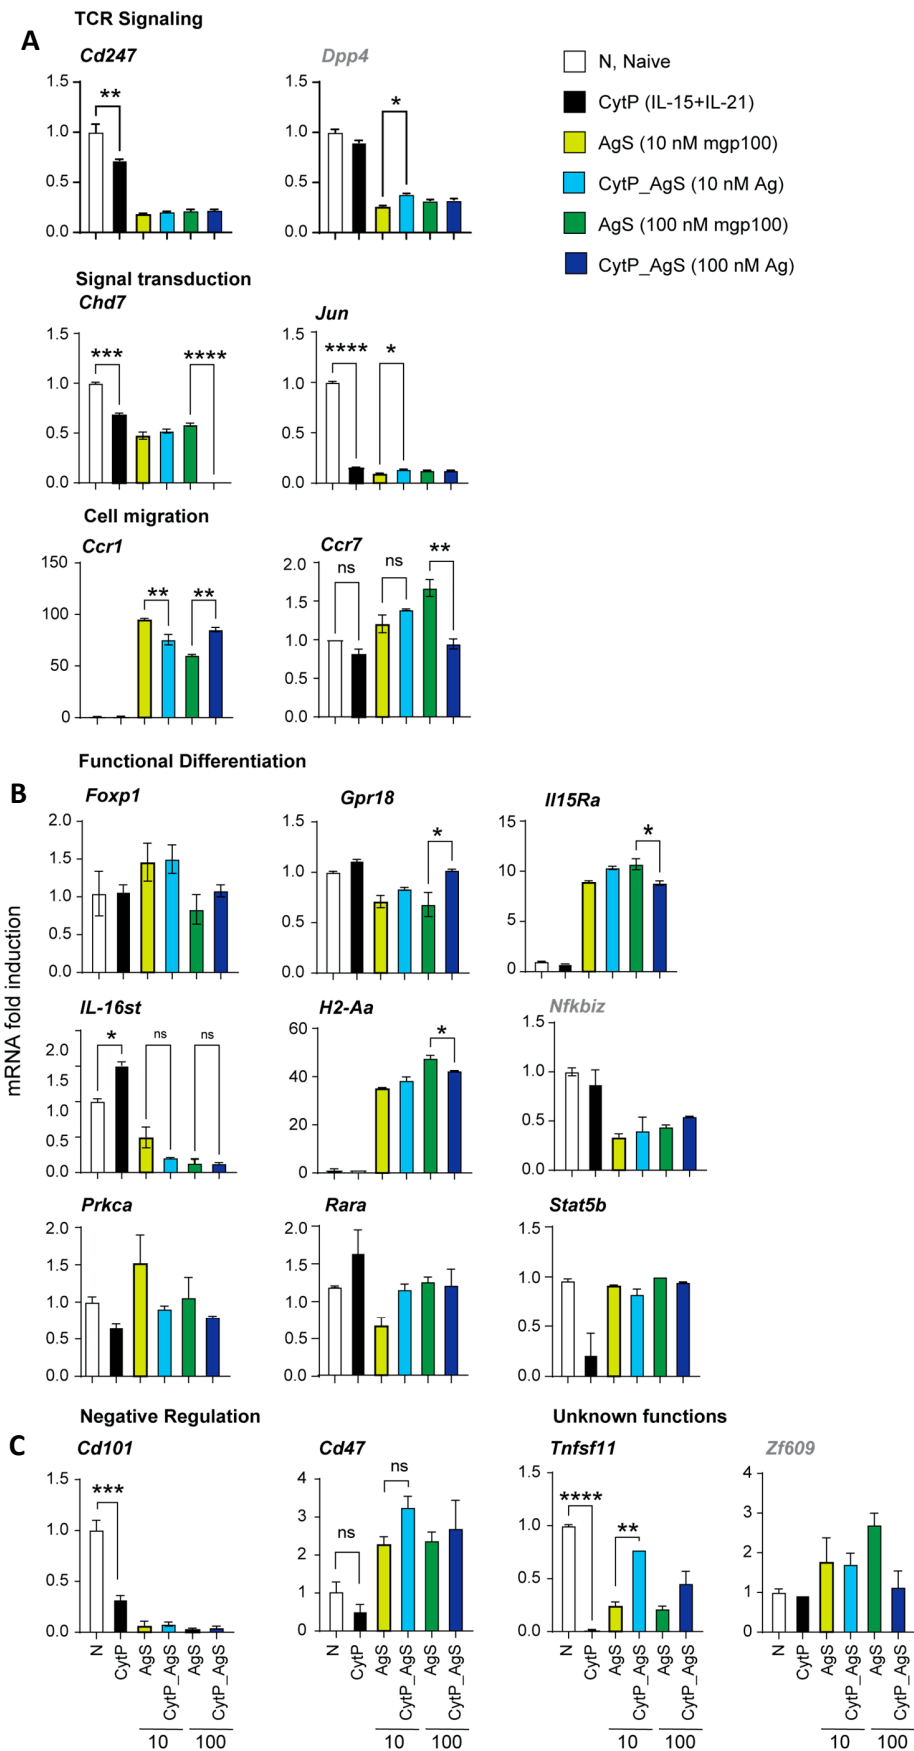

---

**Supplementary Figure S5.** (A–C) RT-qPCR analysis of additional genes implicated in T cell activation, signaling, effector differentiation, negative regulation and exhaustion in naïve (N), cytokine-primed (CytP) and Ag-stimulated (10 or 100 nM of PMEL-1 peptide) cells without (AgS) or with cytokine priming (CytP\_AgS). Fold induction was calculated based on the expression level in naïve PML-1 cells. Mean + SEM for 3 independent experiments are shown. Comparison by one-way ANOVA with Tukey's multiple comparison test. \*,  $p < 0.05$ , \*\*  $< 0.01$ , \*\*\*  $< 0.001$ , \*\*\*\*  $< 0.0001$ .

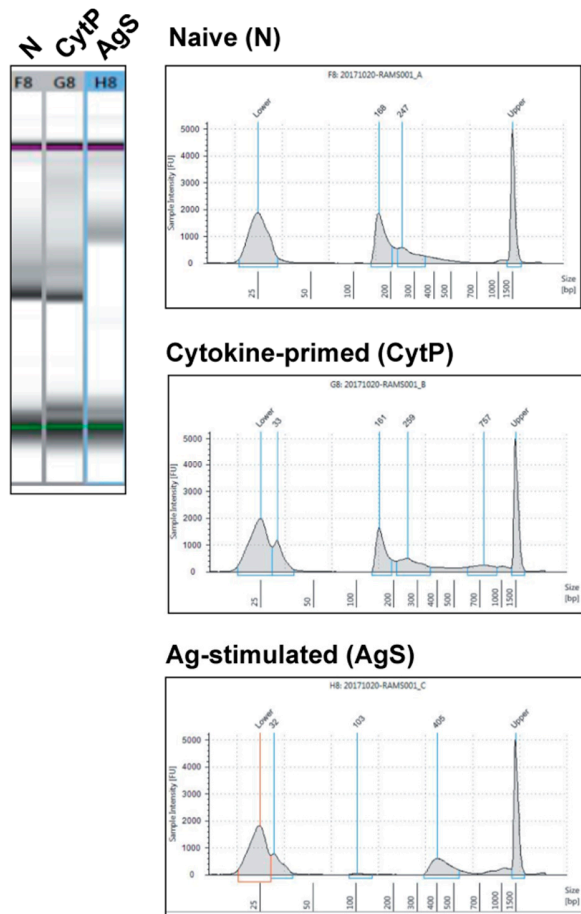

**Supplementary Figure S6.** Bioanalyzer quality assessment of ATACseq libraries of naive, cytokine-primed and Ag-stimulated PMEL-1 TCR transgenic CD8<sup>+</sup> T lymphocytes.
