# Supplementary material for: Inflammatory Cytokines That Enhance Antigen Responsiveness of Naïve CD8+ T Lymphocytes Modulate Chromatin Accessibility of Genes Impacted by Antigen Stimulation
Source: Int J Mol Sci. 2022 Nov 16;23(22):14122. doi: 10.3390/ijms232214122 (PMC9698886; doi:10.3390/ijms232214122)
Supplement: Supplementary file 1 [file ijms-23-14122-s001.zip › Ilangumaran_IJMS-MI_2022_Supplementary Tables.xlsx]

## Sheet: Table S1A
Table S1A. HOMER Opening peaks in Cytokine-primed cells Data is sorted alphabetically by the gene name; Only peaks above the peak score value of 0.5 are shown.
PeakID (cmd=annotatePeaks.pl ../opening_peaks_BA.bed mm10 -go go_opening_peaks_BA)	Chr	Start	End	Strand	Peak Score	Focus Ratio/Region Size	Annotation	Detailed Annotation	Distance to TSS	Nearest PromoterID	Entrez ID	Nearest Unigene	Nearest Refseq	Nearest Ensembl	Gene Name	Gene Alias	Gene Description	Gene Type
chr9_94562991_94563677	chr9	94562992	94563677	+	0.630204	NA	Intergenic	Intergenic	-25253	NM_001033145	68861	Mm.258746	NM_001033145	ENSMUSG00000045414	1190002N15Rik	GoPro49|HASF	RIKEN cDNA 1190002N15 gene	protein-coding
chr13_5666242_5666569	chr13	5666243	5666569	+	0.721066	NA	Intergenic	Intergenic	191686	NR_045891	71867	Mm.179181	NR_045891		1700016G22Rik	-	RIKEN cDNA 1700016G22 gene	ncRNA
chr2_46371045_46371404	chr2	46371046	46371404	+	0.734234	NA	Intergenic	Intergenic	674620	NR_040497	69405	Mm.396184	NR_040497	ENSMUSG00000086202	1700019E08Rik	-	RIKEN cDNA 1700019E08 gene	ncRNA
chr2_46370821_46371458	chr2	46370822	46371458	+	0.725918	NA	Intergenic	Intergenic	674535	NR_040497	69405	Mm.396184	NR_040497	ENSMUSG00000086202	1700019E08Rik	-	RIKEN cDNA 1700019E08 gene	ncRNA
chr1_183962301_183962948	chr1	183962302	183962948	+	0.620688	NA	Intergenic	Intergenic	71373	NM_028516	73363	Mm.50115	NM_028516	ENSMUSG00000044854	1700056E22Rik	-	RIKEN cDNA 1700056E22 gene	protein-coding
chr14_54675212_54675674	chr14	54675213	54675674	+	0.811176	NA	intron (NM_001085473, intron 4 of 18)	B1_Mur3|SINE|Alu	-10728	NM_021437	58248	Mm.197509	NM_021437	ENSMUSG00000040822	1700123O20Rik	-	RIKEN cDNA 1700123O20 gene	protein-coding
chr12_12547387_12548252	chr12	12547388	12548252	+	0.801045	NA	Intergenic	Intergenic	-155345	NR_045829	70858	Mm.410838	NR_045829		4921511I17Rik	-	RIKEN cDNA 4921511I17 gene	ncRNA
chr16_64766690_64767290	chr16	64766691	64767290	+	0.630606	NA	exon (NM_026273, exon 3 of 3)	exon (NM_026273, exon 3 of 3)	3949	NM_026273	67609	Mm.212157	NM_026273	ENSMUSG00000059920	4930453N24Rik	AI649104	RIKEN cDNA 4930453N24 gene	protein-coding
chr10_96879557_96880067	chr10	96879558	96880067	+	0.638227	NA	Intergenic	Intergenic	-155956	NR_045358	75301	Mm.108650	NR_045358		4930556N09Rik	-	RIKEN cDNA 4930556N09 gene	ncRNA
chr2_52310704_52311206	chr2	52310705	52311206	+	0.748639	NA	intron (NM_010889, intron 12 of 156)	intron (NM_010889, intron 12 of 156)	19953	NR_040620	78049	Mm.243883	NR_040620		4930573O16Rik	-	RIKEN cDNA 4930573O16 gene	ncRNA
chr9_118360838_118361565	chr9	118360839	118361565	+	0.649248	NA	Intergenic	Intergenic	-68637	NR_040716	71196	Mm.73218	NR_040716		4933432G23Rik	-	RIKEN cDNA 4933432G23 gene	ncRNA
chr9_118400636_118401020	chr9	118400637	118401020	+	0.646094	NA	Intergenic	Intergenic	-29011	NR_040716	71196	Mm.73218	NR_040716		4933432G23Rik	-	RIKEN cDNA 4933432G23 gene	ncRNA
chr2_167804760_167805647	chr2	167804761	167805647	+	0.739567	NA	Intergenic	Intergenic	114027	NR_015500	329562	Mm.123101	NM_177851	ENSMUSG00000006462	A530013C23Rik	-	RIKEN cDNA A530013C23 gene	ncRNA
chr3_115857750_115858282	chr3	115857751	115858282	+	0.695971	NA	Intergenic	Intergenic	30043	NR_027894	68161	Mm.392043	NR_015487		A930005H10Rik	-	RIKEN cDNA A930005H10 gene	ncRNA
chr3_115857603_115858461	chr3	115857604	115858461	+	0.648701	NA	Intergenic	Intergenic	30027	NR_027894	68161	Mm.392043	NR_015487		A930005H10Rik	-	RIKEN cDNA A930005H10 gene	ncRNA
chr13_8457865_8458308	chr13	8457866	8458308	+	0.720708	NA	intron (NM_001289530, intron 1 of 9)	intron (NM_001289530, intron 1 of 9)	255221	NM_052977	94191	Mm.425794	NM_052977	ENSMUSG00000052551	Adarb2	Adar3|RED2	adenosine deaminase, RNA-specific, B2	protein-coding
chr3_20340469_20340968	chr3	20340470	20340968	+	0.599635	NA	intron (NM_175086, intron 1 of 1)	L1MEc|LINE|L1	26458	NM_175086	11608	Mm.134863	NM_175086	ENSMUSG00000054988	Agtr1b	AT1B|AT2R1B|Agtr-1b|Angtr-1b	angiotensin II receptor, type 1b	protein-coding
chr3_107047867_107048534	chr3	107047868	107048534	+	0.607763	NA	intron (NR_033498, intron 1 of 1)	intron (NR_033498, intron 1 of 1)	8697	NR_033498	229694	Mm.347584	NM_173787	ENSMUSG00000056145	AI504432	A230102G19	expressed sequence AI504432	ncRNA
chr7_27609565_27610156	chr7	27609566	27610156	+	0.622262	NA	intron (NM_001110208, intron 2 of 13)	intron (NM_001110208, intron 2 of 13)	4001	NM_007434	11652	Mm.177194	NM_007434	ENSMUSG00000004056	Akt2	2410016A19Rik|AW554154|PKB|PKBbeta	thymoma viral proto-oncogene 2	protein-coding
chr7_27609737_27610012	chr7	27609738	27610012	+	0.618092	NA	intron (NM_001110208, intron 2 of 13)	intron (NM_001110208, intron 2 of 13)	4015	NM_007434	11652	Mm.177194	NM_007434	ENSMUSG00000004056	Akt2	2410016A19Rik|AW554154|PKB|PKBbeta	thymoma viral proto-oncogene 2	protein-coding
chr7_27609367_27610166	chr7	27609368	27610166	+	0.589094	NA	intron (NM_001110208, intron 2 of 13)	L2b|LINE|L2	3907	NM_007434	11652	Mm.177194	NM_007434	ENSMUSG00000004056	Akt2	2410016A19Rik|AW554154|PKB|PKBbeta	thymoma viral proto-oncogene 2	protein-coding
chrX_142907468_142908077	chrX	142907469	142908077	+	0.897741	NA	intron (NM_019496, intron 2 of 5)	intron (NM_019496, intron 2 of 5)	58955	NM_019496	56068	Mm.143724	NM_019496		Ammecr1	6230420G18Rik	Alport syndrome, mental retardation, midface hypoplasia and elliptocytosis chromosomal region gene 1	protein-coding
chr7_58475100_58475677	chr7	58475101	58475677	+	0.856517	NA	Intergenic	Intergenic	-182813	NM_009728	11982	Mm.135129	NM_009728	ENSMUSG00000025324	Atp10a	Atp10c|pfatp	ATPase, class V, type 10A	protein-coding
chr3_101570263_101571144	chr3	101570264	101571144	+	0.741426	NA	Intergenic	RLTR9A|LTR|ERVK	34003	NM_144900	11928	Mm.280103	NM_144900	ENSMUSG00000033161	Atp1a1	Atpa-1|BC010319	ATPase, Na+/K+ transporting, alpha 1 polypeptide	protein-coding
chr3_101570731_101571134	chr3	101570732	101571134	+	0.604042	NA	Intergenic	ORR1B2|LTR|ERVL-MaLR	33774	NM_144900	11928	Mm.280103	NM_144900	ENSMUSG00000033161	Atp1a1	Atpa-1|BC010319	ATPase, Na+/K+ transporting, alpha 1 polypeptide	protein-coding
chr8_57592722_57592917	chr8	57592723	57592917	+	0.590167	NA	intron (NM_001167981, intron 1 of 11)	B3A|SINE|B2	-58933	NR_040698	100502619	Mm.393851	NR_040698		AW046200	-	expressed sequence AW046200	ncRNA
chr17_48318811_48319083	chr17	48318812	48319083	+	0.771546	NA	intron (NM_177083, intron 2 of 5)	intron (NM_177083, intron 2 of 5)	2785	NM_177083	320148	Mm.123455	NM_177083	ENSMUSG00000043740	B430306N03Rik	Treml6	RIKEN cDNA B430306N03 gene	protein-coding
chr17_48318698_48319311	chr17	48318699	48319311	+	0.710582	NA	intron (NM_177083, intron 2 of 5)	intron (NM_177083, intron 2 of 5)	2843	NM_177083	320148	Mm.123455	NM_177083	ENSMUSG00000043740	B430306N03Rik	Treml6	RIKEN cDNA B430306N03 gene	protein-coding
chr6_144922800_144923124	chr6	144922801	144923124	+	0.595069	NA	Intergenic	Intergenic	125850	NM_001024468	12035	Mm.4606	NM_007532	ENSMUSG00000030268	Bcat1	BCATc|Eca39	branched chain aminotransferase 1, cytosolic	protein-coding
chr16_45261281_45261674	chr16	45261282	45261674	+	0.686686	NA	Intergenic	ORR1B1|LTR|ERVL-MaLR	37141	NM_177584	208154	Mm.38199	NM_177584	ENSMUSG00000052013	Btla	A630002H24	B and T lymphocyte associated	protein-coding
chr16_45261225_45261974	chr16	45261226	45261974	+	0.625697	NA	Intergenic	Intergenic	37263	NM_177584	208154	Mm.38199	NM_177584	ENSMUSG00000052013	Btla	A630002H24	B and T lymphocyte associated	protein-coding
chr1_151105181_151105611	chr1	151105182	151105611	+	0.633366	NA	Intergenic	Intergenic	-32638	NR_038011	402734	Mm.337666	NR_038011		C730036E19Rik	-	RIKEN cDNA C730036E19 gene	ncRNA
chr16_45038590_45039050	chr16	45038591	45039050	+	0.701492	NA	Intergenic	Intergenic	-55233	NM_026439	67896	Mm.181074	NM_026439	ENSMUSG00000022665	Ccdc80	2610001E17Rik|DRO1|Ssg1|Urb	coiled-coil domain containing 80	protein-coding
chr16_45038390_45039051	chr16	45038391	45039051	+	0.659909	NA	Intergenic	MLT2B2|LTR|ERVL	-55332	NM_026439	67896	Mm.181074	NM_026439	ENSMUSG00000022665	Ccdc80	2610001E17Rik|DRO1|Ssg1|Urb	coiled-coil domain containing 80	protein-coding
chr7_38090339_38090645	chr7	38090340	38090645	+	0.716626	NA	Intergenic	Intergenic	16998	NM_007633	12447	Mm.16110	NM_007633	ENSMUSG00000002068	Ccne1	AW538188|CycE1	cyclin E1	protein-coding
chr7_38090108_38090705	chr7	38090109	38090705	+	0.642869	NA	Intergenic	Intergenic	17083	NM_007633	12447	Mm.16110	NM_007633	ENSMUSG00000002068	Ccne1	AW538188|CycE1	cyclin E1	protein-coding
chr9_123942035_123942587	chr9	123942036	123942587	+	0.805568	NA	Intergenic	Intergenic	26381	NM_009912	12768	Mm.274927	NM_009912	ENSMUSG00000025804	Ccr1	Cmkbr1|Mip-1a-R	chemokine (C-C motif) receptor 1	protein-coding
chr9_114488332_114488757	chr9	114488333	114488757	+	0.878455	NA	Intergenic	Intergenic	7999	NM_009916	12773	Mm.1337	NM_009916	ENSMUSG00000047898	Ccr4	C-C CKR-4|CHEMR1|Cmkbr4|LESTR|Sdf1r	chemokine (C-C motif) receptor 4	protein-coding
chr9_114488171_114488772	chr9	114488172	114488772	+	0.854584	NA	Intergenic	Intergenic	8072	NM_009916	12773	Mm.1337	NM_009916	ENSMUSG00000047898	Ccr4	C-C CKR-4|CHEMR1|Cmkbr4|LESTR|Sdf1r	chemokine (C-C motif) receptor 4	protein-coding
chr9_114487351_114488780	chr9	114487352	114488780	+	0.718364	NA	Intergenic	LTR16A|LTR|ERVL	8478	NM_009916	12773	Mm.1337	NM_009916	ENSMUSG00000047898	Ccr4	C-C CKR-4|CHEMR1|Cmkbr4|LESTR|Sdf1r	chemokine (C-C motif) receptor 4	protein-coding
chr11_99180054_99180723	chr11	99180055	99180723	+	0.73048	NA	Intergenic	Intergenic	-25312	NM_007719	12775	Mm.2932	NM_007719	ENSMUSG00000037944	Ccr7	CD197|Cdw197|Cmkbr7|EBI1|Ebi1h	chemokine (C-C motif) receptor 7	protein-coding
chr11_114885070_114885538	chr11	114885071	114885538	+	0.69734	NA	Intergenic	Intergenic	-4737	NM_170758	217303	Mm.294439	NM_170758	ENSMUSG00000034652	Cd300a	B230315M08Rik|Clm8|LMIR1|MAIR-I|MAIR-Ia|MMAC8|Pigr4|mcpir1	CD300A antigen	protein-coding
chr11_121019446_121019875	chr11	121019447	121019875	+	0.730161	NA	Intergenic	Intergenic	19817	NM_009854	12516	Mm.4100	NM_009854	ENSMUSG00000025163	Cd7	-	CD7 antigen	protein-coding
chr4_89388116_89388489	chr4	89388117	89388489	+	0.595401	NA	Intergenic	Intergenic	-77271	NM_007670	12579	Mm.423094	NM_007670	ENSMUSG00000073802	Cdkn2b	AV083695|INK4b|MTS2|p15|p15(INK4b)|p15INK4b	cyclin-dependent kinase inhibitor 2B (p15, inhibits CDK4)	protein-coding
chr4_8733956_8734372	chr4	8733957	8734372	+	0.679613	NA	intron (NM_001277149, intron 1 of 37)	intron (NM_001277149, intron 1 of 37)	43758	NM_001277149	320790	Mm.138792	NM_001033395	ENSMUSG00000041235	Chd7	A730019I05Rik|Cycn|Cyn|Dz|Edy|Flo|GENA 47|GENA 60|Gena 52|Lda|Mt|Obt|Todo|WBE1|Whi|metis	chromodomain helicase DNA binding protein 7	protein-coding
chr10_82969531_82969979	chr10	82969532	82969979	+	0.591308	NA	Intergenic	RMER17D2|LTR|ERVK	-15742	NM_021439	58250	Mm.360747	NM_021439	ENSMUSG00000034612	Chst11	1110020P09Rik|C4ST|C4ST-1|C4ST1|C4s	carbohydrate sulfotransferase 11	protein-coding
chr7_66183442_66183831	chr7	66183443	66183831	+	0.674296	NA	Intergenic	Intergenic	74122	NM_001081163	269941	Mm.333916	NM_001081163	ENSMUSG00000032640	Chsy1	mKIAA0990	chondroitin sulfate synthase 1	protein-coding
chr11_45874235_45874640	chr11	45874236	45874640	+	0.625044	NA	intron (NM_001045520, intron 1 of 11)	intron (NM_001045520, intron 1 of 11)	22474	NM_001045520	216705	Mm.169673	NM_001045520	ENSMUSG00000006169	Clint1	AI642036|AW537616|C530049I24Rik|Enth|Epn4|F630206G17Rik|mKIAA0171	clathrin interactor 1	protein-coding
chr17_78271345_78271924	chr17	78271346	78271924	+	0.819302	NA	intron (NM_015800, intron 2 of 16)	intron (NM_015800, intron 2 of 16)	71387	NM_015800	50766	Mm.311912	NM_015800	ENSMUSG00000024074	Crim1	AU015004	cysteine rich transmembrane BMP regulator 1 (chordin like)	protein-coding
chr18_84872385_84872663	chr18	84872386	84872663	+	0.901509	NA	intron (NM_025797, intron 2 of 4)	intron (NM_025797, intron 2 of 4)	21110	NM_025797	109672	Mm.31018	NM_025797		Cyb5a	0610009N12Rik|Cyb5	cytochrome b5 type A (microsomal)	protein-coding
chrX_113826837_113827153	chrX	113826838	113827153	+	0.679146	NA	intron (NM_001289734, intron 15 of 15)	B3A|SINE|B2	528739	NM_001142570	93837	Mm.79760	NM_033605	ENSMUSG00000025592	Dach2	9430028N04Rik	dachshund 2 (Drosophila)	protein-coding
chr2_62331849_62332356	chr2	62331850	62332356	+	0.940502	NA	3' UTR (NM_010074, exon 26 of 26)	3' UTR (NM_010074, exon 26 of 26)	80128	NM_010074	13482	Mm.1151	NM_010074	ENSMUSG00000035000	Dpp4	Cd26|Dpp-4|THAM	dipeptidylpeptidase 4	protein-coding
chr5_30353639_30353971	chr5	30353640	30353971	+	0.926949	NA	intron (NM_001033460, intron 6 of 15)	intron (NM_001033460, intron 6 of 15)	12142	NM_001033460	381738	Mm.389604	NM_001033460	ENSMUSG00000073102	Drc1	Ccdc164|Gm1060|b2b1654Clo	dynein regulatory complex subunit 1	protein-coding
chr7_90067893_90068425	chr7	90067894	90068425	+	0.748751	NA	Intergenic	Intergenic	39000	NR_110364	319711	Mm.31753	NR_015614		E230029C05Rik	AI452102|B230337J15	RIKEN cDNA E230029C05 gene	ncRNA
chr7_90067998_90068378	chr7	90067999	90068378	+	0.741466	NA	Intergenic	Intergenic	39029	NR_110364	319711	Mm.31753	NR_015614		E230029C05Rik	AI452102|B230337J15	RIKEN cDNA E230029C05 gene	ncRNA
chr7_90067888_90068928	chr7	90067889	90068928	+	0.699109	NA	Intergenic	Intergenic	39249	NR_110364	319711	Mm.31753	NR_015614		E230029C05Rik	AI452102|B230337J15	RIKEN cDNA E230029C05 gene	ncRNA
chr4_136177541_136178310	chr4	136177542	136178310	+	0.722056	NA	intron (NM_177733, intron 1 of 6)	intron (NM_177733, intron 1 of 6)	5532	NM_177733	242705	Mm.307932	NM_177733	ENSMUSG00000018983	E2f2	9230110J10|E130207A07	E2F transcription factor 2	protein-coding
chr4_136177250_136178359	chr4	136177251	136178359	+	0.689281	NA	intron (NM_177733, intron 1 of 6)	intron (NM_177733, intron 1 of 6)	5411	NM_177733	242705	Mm.307932	NM_177733	ENSMUSG00000018983	E2f2	9230110J10|E130207A07	E2F transcription factor 2	protein-coding
chr9_77955595_77955870	chr9	77955596	77955870	+	0.651188	NA	intron (NM_134255, intron 1 of 7)	intron (NM_134255, intron 1 of 7)	38368	NM_134255	68801	Mm.430736	NM_134255	ENSMUSG00000032349	Elovl5	1110059L23Rik|AI747313|AU043003|HELO1	ELOVL family member 5, elongation of long chain fatty acids (yeast)	protein-coding
chr4_11419530_11420224	chr4	11419531	11420224	+	0.664304	NA	Intergenic	Intergenic	-33094	NM_194055	207920	Mm.387719	NM_194055	ENSMUSG00000040728	Esrp1	2210008M09Rik|A630065D16|BC031468|Rbm35a	epithelial splicing regulatory protein 1	protein-coding
chr5_3460776_3461381	chr5	3460777	3461381	+	0.929646	NA	intron (NM_009873, intron 3 of 6)	intron (NM_009873, intron 3 of 6)	-82754	NM_001042501	68152	Mm.240265	NM_026583		Fam133b	2900022K02Rik|5830415L20Rik	family with sequence similarity 133, member B	protein-coding
chr5_3460214_3461370	chr5	3460215	3461370	+	0.85972	NA	intron (NM_009873, intron 3 of 6)	intron (NM_009873, intron 3 of 6)	-83041	NM_001042501	68152	Mm.240265	NM_026583		Fam133b	2900022K02Rik|5830415L20Rik	family with sequence similarity 133, member B	protein-coding
chr5_3477687_3478305	chr5	3477688	3478305	+	0.629167	NA	intron (NM_009873, intron 4 of 6)	intron (NM_009873, intron 4 of 6)	-65837	NM_001042501	68152	Mm.240265	NM_026583		Fam133b	2900022K02Rik|5830415L20Rik	family with sequence similarity 133, member B	protein-coding
chr5_3477606_3478593	chr5	3477607	3478593	+	0.596764	NA	intron (NM_009873, intron 4 of 6)	intron (NM_009873, intron 4 of 6)	-65733	NM_001042501	68152	Mm.240265	NM_026583		Fam133b	2900022K02Rik|5830415L20Rik	family with sequence similarity 133, member B	protein-coding
chr11_109758486_109759304	chr11	109758487	109759304	+	0.763172	NA	Intergenic	Lx9|LINE|L1	-36639	NM_153782	208659	Mm.208662	NM_153782	ENSMUSG00000020614	Fam20a	AI606893	family with sequence similarity 20, member A	protein-coding
chr9_85107251_85107927	chr9	85107252	85107927	+	0.66836	NA	Intergenic	Intergenic	219535	NM_001160378	212943	Mm.74610	NM_001160378	ENSMUSG00000032265	Fam46a	D930050G01Rik	family with sequence similarity 46, member A	protein-coding
chr9_85107295_85107691	chr9	85107296	85107691	+	0.632925	NA	Intergenic	Intergenic	219631	NM_001160378	212943	Mm.74610	NM_001160378	ENSMUSG00000032265	Fam46a	D930050G01Rik	family with sequence similarity 46, member A	protein-coding
chr17_63288405_63288776	chr17	63288406	63288776	+	0.647626	NA	intron (NM_015794, intron 6 of 8)	intron (NM_015794, intron 6 of 8)	211989	NM_015794	50758	Mm.136366	NM_015794		Fbxl17	6330576B01Rik|AI452053|BB073797|C130023C01Rik|Fbx13|Fbxo13	F-box and leucine-rich repeat protein 17	protein-coding
chr17_63362109_63362576	chr17	63362110	63362576	+	0.591702	NA	intron (NM_015794, intron 5 of 8)	RMER19A|LTR|ERVK	138237	NM_015794	50758	Mm.136366	NM_015794		Fbxl17	6330576B01Rik|AI452053|BB073797|C130023C01Rik|Fbx13|Fbxo13	F-box and leucine-rich repeat protein 17	protein-coding
chr12_59250509_59250901	chr12	59250510	59250901	+	0.771916	NA	Intergenic	B3A|SINE|B2	-31222	NM_001033156	70611	Mm.311026	NM_001033156	ENSMUSG00000035329	Fbxo33	5730501N20Rik|AI642135	F-box protein 33	protein-coding
chr17_28488204_28488676	chr17	28488205	28488676	+	0.634981	NA	Intergenic	Intergenic	-2291	NM_010220	14229	Mm.276405	NM_010220	ENSMUSG00000024222	Fkbp5	D17Ertd592e|Dit1|FKBP-5|FKBP51	FK506 binding protein 5	protein-coding
chr12_76848092_76848903	chr12	76848093	76848903	+	0.586956	NA	intron (NM_145927, intron 1 of 11)	B4|SINE|B4	11031	NM_145927	110606	Mm.151174	NM_145927	ENSMUSG00000033373	Fntb	2010013E13Rik|AA409500	farnesyltransferase, CAAX box, beta	protein-coding
chr3_21965590_21966020	chr3	21965591	21966020	+	0.873417	NA	Intergenic	Intergenic	-110847	NM_030732	81004	Mm.202966	NM_030732	ENSMUSG00000027630	Foxn3	8030499H02Rik|A630076E03Rik|AW539987|C21|C230089I12Rik|DC42|Ira1|TBLR1	transducin (beta)-like 1X-linked receptor 1	protein-coding
chr12_99510119_99510476	chr12	99510120	99510476	+	0.639924	NA	Intergenic	B3|SINE|B2	-60224	NM_183186	71375	Mm.341972	NM_183186	ENSMUSG00000033713	Foxn3	5430426H20Rik|AA589593|AW556347|Ches1|Ches1l|HTLFL1	forkhead box N3	protein-coding
chr12_99509971_99510622	chr12	99509972	99510622	+	0.63291	NA	Intergenic	B3|SINE|B2	-60223	NM_183186	71375	Mm.341972	NM_183186	ENSMUSG00000033713	Foxn3	5430426H20Rik|AA589593|AW556347|Ches1|Ches1l|HTLFL1	forkhead box N3	protein-coding
chr13_51849256_51849628	chr13	51849257	51849628	+	0.688273	NA	TTS (NM_011817)	TTS (NM_011817)	2767	NM_011817	23882	Mm.281298	NM_011817	ENSMUSG00000021453	Gadd45g	AI327420|C86281|CR6|DDIT2|OIG37	growth arrest and DNA-damage-inducible 45 gamma	protein-coding
chr11_4223407_4223809	chr11	4223408	4223809	+	0.886307	NA	Intergenic	Intergenic	5357	NM_028022	71962	Mm.7852	NM_028022	ENSMUSG00000020424	Gatsl3	2410008K03Rik	GATS protein-like 3	protein-coding
chr13_75843984_75844328	chr13	75843985	75844328	+	0.633316	NA	intron (NM_053108, intron 1 of 2)	intron (NM_053108, intron 1 of 2)	4270	NM_053108	93692	Mm.25844	NM_053108	ENSMUSG00000021591	Glrx	C86710|D13Wsu156e|Glrx1|Grx1|TTase	glutaredoxin	protein-coding
chr13_75843969_75844577	chr13	75843970	75844577	+	0.585179	NA	intron (NM_053108, intron 1 of 2)	intron (NM_053108, intron 1 of 2)	4387	NM_053108	93692	Mm.25844	NM_053108	ENSMUSG00000021591	Glrx	C86710|D13Wsu156e|Glrx1|Grx1|TTase	glutaredoxin	protein-coding
chr1_143749632_143750217	chr1	143749633	143750217	+	0.685218	NA	TTS (NM_013835)	TTS (NM_013835)	9478	NM_001038594	69367	Mm.272727	NM_023505	ENSMUSG00000018196	Glrx2	1700010P22Rik|AI645710|Grx2	glutaredoxin 2 (thioltransferase)	protein-coding
chr3_79335990_79336510	chr3	79335991	79336510	+	0.769416	NA	Intergenic	Intergenic	-9126	NM_001142953	100233207	Mm.373801	NM_001142953	ENSMUSG00000091685	Gm17359	-	predicted gene, 17359	protein-coding
chr1_88584472_88584923	chr1	88584473	88584923	+	0.616397	NA	Intergenic	Intergenic	33181	NR_037971	100503197	Mm.99352	NR_037971		Gm19589	-	predicted gene, 19589	ncRNA
chr7_106556503_106556813	chr7	106556504	106556813	+	0.780708	NA	Intergenic	RLTR13D4|LTR|ERVK	87987	NM_001277179	434223	Mm.276443	NM_001277179		Gm1966	-	predicted gene 1966	protein-coding
chr7_106556404_106556905	chr7	106556405	106556905	+	0.779681	NA	Intergenic	RLTR13D4|LTR|ERVK	87990	NM_001277179	434223	Mm.276443	NM_001277179		Gm1966	-	predicted gene 1966	protein-coding
chr3_143581740_143582323	chr3	143581741	143582323	+	0.68765	NA	Intergenic	MER45B|DNA|hAT-Tip100	130111	NR_040405	621809	Mm.360134	NR_040405		Gm6260	EG621809	predicted gene 6260	ncRNA
chr3_143581787_143582518	chr3	143581788	143582518	+	0.671478	NA	Intergenic	MER45B|DNA|hAT-Tip100	129990	NR_040405	621809	Mm.360134	NR_040405		Gm6260	EG621809	predicted gene 6260	ncRNA
chr3_143582028_143582518	chr3	143582029	143582518	+	0.59783	NA	Intergenic	Intergenic	129870	NR_040405	621809	Mm.360134	NR_040405		Gm6260	EG621809	predicted gene 6260	ncRNA
chr14_19994101_19994474	chr14	19994102	19994474	+	0.628	NA	Intergenic	ORR1D1|LTR|ERVL-MaLR	-17039	NM_001285909	14702	Mm.41737	NM_010315	ENSMUSG00000043004	Gng2	82	guanine nucleotide binding protein (G protein), gamma 2	protein-coding
chr14_19994176_19994423	chr14	19994177	19994423	+	0.601404	NA	Intergenic	ORR1D1|LTR|ERVL-MaLR	-17051	NM_001285909	14702	Mm.41737	NM_010315	ENSMUSG00000043004	Gng2	82	guanine nucleotide binding protein (G protein), gamma 2	protein-coding
chr12_102504633_102505304	chr12	102504634	102505304	+	0.62236	NA	Intergenic	Intergenic	35059	NM_013747	27277	Mm.273370	NM_013747	ENSMUSG00000021192	Golga5	Ret-II	golgi autoantigen, golgin subfamily a, 5	protein-coding
chr12_102504839_102505137	chr12	102504840	102505137	+	0.597133	NA	Intergenic	Intergenic	35078	NM_013747	27277	Mm.273370	NM_013747	ENSMUSG00000021192	Golga5	Ret-II	golgi autoantigen, golgin subfamily a, 5	protein-coding
chr6_59324861_59325380	chr6	59324862	59325380	+	0.633796	NA	Intergenic	Intergenic	101169	NM_183183	243385	Mm.138080	NM_183183	ENSMUSG00000045441	Gprin3	C030038J10Rik|C730021L23	GPRIN family member 3	protein-coding
chr18_41982655_41983098	chr18	41982656	41983098	+	1.13814	NA	Intergenic	Intergenic	16172	NM_001033426	332309	Mm.240520	NM_001033426	ENSMUSG00000073574	Grxcr2	Gm851	glutaredoxin, cysteine rich 2	protein-coding
chr18_41982765_41983002	chr18	41982766	41983002	+	1.12434	NA	Intergenic	Intergenic	16165	NM_001033426	332309	Mm.240520	NM_001033426	ENSMUSG00000073574	Grxcr2	Gm851	glutaredoxin, cysteine rich 2	protein-coding
chr18_41979475_41980038	chr18	41979476	41980038	+	0.964365	NA	Intergenic	Intergenic	19292	NM_001033426	332309	Mm.240520	NM_001033426	ENSMUSG00000073574	Grxcr2	Gm851	glutaredoxin, cysteine rich 2	protein-coding
chr18_41979205_41980041	chr18	41979206	41980041	+	0.954428	NA	Intergenic	Intergenic	19426	NM_001033426	332309	Mm.240520	NM_001033426	ENSMUSG00000073574	Grxcr2	Gm851	glutaredoxin, cysteine rich 2	protein-coding
chr18_41978908_41980088	chr18	41978909	41980088	+	0.936775	NA	Intergenic	Intergenic	19551	NM_001033426	332309	Mm.240520	NM_001033426	ENSMUSG00000073574	Grxcr2	Gm851	glutaredoxin, cysteine rich 2	protein-coding
chr18_41985622_41985997	chr18	41985623	41985997	+	0.78381	NA	TTS (NM_001033426)	TTS (NM_001033426)	13239	NM_001033426	332309	Mm.240520	NM_001033426	ENSMUSG00000073574	Grxcr2	Gm851	glutaredoxin, cysteine rich 2	protein-coding
chr5_30353527_30354176	chr5	30353528	30354176	+	0.928267	NA	intron (NM_001033460, intron 6 of 15)	intron (NM_001033460, intron 6 of 15)	12189	NM_001033460	381738	Mm.389604	NM_001033460	ENSMUSG00000073102	Gzmb	Ccdc164|Gm1060|b2b1654Clo	dynein regulatory complex subunit 1	protein-coding
chr14_56266097_56266407	chr14	56266098	56266407	+	0.706226	NA	Intergenic	Intergenic	-3992	NM_013542	14939	Mm.14874	NM_013542	ENSMUSG00000015437	Gzmb	AI553453|CCP-1/C11|CCP1|Ctla-1|Ctla1|GZB	granzyme B	protein-coding
chr14_56275673_56276521	chr14	56275674	56276521	+	0.595582	NA	Intergenic	Intergenic	-13837	NM_013542	14939	Mm.14874	NM_013542	ENSMUSG00000015437	Gzmb	AI553453|CCP-1/C11|CCP1|Ctla-1|Ctla1|GZB	granzyme B	protein-coding
chr13_23593064_23593674	chr13	23593065	23593674	+	0.607475	NA	intron (NM_001177653, intron 1 of 1)	intron (NM_001177653, intron 1 of 1)	-7399	NM_001290530	319179	Mm.440391	NM_178194	ENSMUSG00000047246	Hist1h2be	-	histone cluster 1, H2be	protein-coding
chr10_14189156_14189577	chr10	14189157	14189577	+	0.599711	NA	Intergenic	Intergenic	222988	NM_010437	15273	Mm.42157	NM_010437	ENSMUSG00000015501	Hivep2	MIBP1|Schnurri-2|Shn-2	human immunodeficiency virus type I enhancer binding protein 2	protein-coding
chr17_12759132_12759907	chr17	12759133	12759907	+	0.61974	NA	intron (NM_010515, intron 1 of 47)	intron (NM_010515, intron 1 of 47)	10186	NM_010515	16004	Mm.26553	NM_010515	ENSMUSG00000023830	Igf2r	AI661837|CD222|CI-MPR|M6P/IGF2R|Mpr300	insulin-like growth factor 2 receptor	protein-coding
chr10_6927887_6928280	chr10	6927888	6928280	+	0.760251	NA	intron (NM_001033391, intron 6 of 7)	RSINE1|SINE|B4	52381	NM_001170800	320495	Mm.331674	NM_001033391	ENSMUSG00000064065	Ipcef1	A130090K04Rik	interaction protein for cytohesin exchange factors 1	protein-coding
chr2_79276211_79276736	chr2	79276212	79276736	+	0.694665	NA	intron (NM_010576, intron 4 of 27)	intron (NM_010576, intron 4 of 27)	21048	NM_010576	16401	Mm.31903	NM_010576	ENSMUSG00000027009	Itga4	CD49D|Itga4B	integrin alpha 4	protein-coding
chr2_79269978_79270560	chr2	79269979	79270560	+	0.600306	NA	intron (NM_010576, intron 2 of 27)	intron (NM_010576, intron 2 of 27)	14843	NM_010576	16401	Mm.31903	NM_010576	ENSMUSG00000027009	Itga4	CD49D|Itga4B	integrin alpha 4	protein-coding
chr13_44763075_44763492	chr13	44763076	44763492	+	0.647714	NA	intron (NM_001205043, intron 1 of 17)	B3|SINE|B2	32013	NM_001205043	16468	Mm.25059	NM_021878	ENSMUSG00000038518	Jarid2	Jmj|jumonji	jumonji, AT rich interactive domain 2	protein-coding
chr4_95199626_95200451	chr4	95199627	95200451	+	0.717159	NA	Intergenic	L2|LINE|L2	-147817	NM_010591	16476	Mm.275071	NM_010591	ENSMUSG00000052684	Jun	AP-1|Junc|c-jun	jun proto-oncogene	protein-coding
chr4_95302749_95303854	chr4	95302750	95303854	+	0.669742	NA	Intergenic	Intergenic	-251080	NM_010591	16476	Mm.275071	NM_010591	ENSMUSG00000052684	Jun	AP-1|Junc|c-jun	jun proto-oncogene	protein-coding
chr6_48398457_48398789	chr6	48398458	48398789	+	0.604403	NA	intron (NM_133922, intron 1 of 17)	ORR1E|LTR|ERVL-MaLR	3037	NM_133922	77827	Mm.107646	NM_133922	ENSMUSG00000042810	Krba1	A930040G15Rik|AI448780	KRAB-A domain containing 1	protein-coding
chr8_34139899_34140213	chr8	34139900	34140213	+	0.691345	NA	intron (NM_026609, intron 2 of 3)	intron (NM_026609, intron 2 of 3)	6683	NM_026609	68192	Mm.34212	NM_026609	ENSMUSG00000031513	Leprotl1	1110067H13Rik|1520402O14Rik|AI854296	leptin receptor overlapping transcript-like 1	protein-coding
chr6_124683595_124684249	chr6	124683596	124684249	+	0.720894	NA	intron (NM_145130, intron 1 of 12)	intron (NM_145130, intron 1 of 12)	20818	NM_145130	14792	Mm.273915	NM_145130	ENSMUSG00000004270	Lpcat3	C3f|Grcc3f|Lpcat|Lpeat|Lplat5|Lpsat|Mboat5|Moact5|Oact5|PTG	lysophosphatidylcholine acyltransferase 3	protein-coding
chr10_61534499_61535134	chr10	61534500	61535134	+	0.725086	NA	intron (NM_153542, intron 3 of 4)	intron (NM_153542, intron 3 of 4)	58984	NM_153542	216011	Mm.136116	NM_153542	ENSMUSG00000037151	Lrrc20	BC036304	leucine rich repeat containing 20	protein-coding
chr12_41347710_41348344	chr12	41347711	41348344	+	0.682573	NA	intron (NM_053122, intron 4 of 6)	RMER1B|Other|Other	138030	NM_001271708	16981	Mm.404786	NM_010733	ENSMUSG00000036295	Lrrn3	NLRR-3	leucine rich repeat protein 3, neuronal	protein-coding
chr6_119343402_119344060	chr6	119343403	119344060	+	0.625599	NA	intron (NM_001033382, intron 30 of 37)	intron (NM_001033382, intron 30 of 37)	-12965	NM_172492	211187	Mm.121498	NM_172492	ENSMUSG00000055003	Lrtm2	A230084J22|AI841794	leucine-rich repeats and transmembrane domains 2	protein-coding
chr6_119343614_119343911	chr6	119343615	119343911	+	0.606952	NA	intron (NM_001033382, intron 30 of 37)	intron (NM_001033382, intron 30 of 37)	-12997	NM_172492	211187	Mm.121498	NM_172492	ENSMUSG00000055003	Lrtm2	A230084J22|AI841794	leucine-rich repeats and transmembrane domains 2	protein-coding
chr18_4278298_4278812	chr18	4278299	4278812	+	0.850708	NA	Intergenic	Intergenic	74398	NM_007746	26410	Mm.3275	NM_007746	ENSMUSG00000024235	Map3k8	Cot|Cot/Tpl2|Est|Estf|Tpl-2|Tpl2|c-COT	mitogen-activated protein kinase kinase kinase 8	protein-coding
chr7_29023407_29024014	chr7	29023408	29024014	+	0.658333	NA	intron (NM_009109, intron 90 of 105)	intron (NM_009109, intron 90 of 105)	40857	NM_008279	26411	Mm.148278	NM_008279	ENSMUSG00000037337	Map4k1	Hpk1|mHPK1	mitogen-activated protein kinase kinase kinase kinase 1	protein-coding
chr12_77056754_77057422	chr12	77056755	77057422	+	0.682196	NA	Intergenic	Intergenic	-94840	NM_001146176	17187	Mm.268548	NM_008558	ENSMUSG00000059436	Max	AA960152|AI875693|bHLHd4|bHLHd5|bHLHd6|bHLHd7|bHLHd8	Max protein	protein-coding
chr12_56327445_56327955	chr12	56327446	56327955	+	0.606611	NA	TTS (NM_145442)	TTS (NM_145442)	18194	NM_145442	217588	Mm.25656	NM_145442	ENSMUSG00000021028	Mbip	4933408E06Rik	MAP3K12 binding inhibitory protein 1	protein-coding
chr7_72283696_72284147	chr7	72283697	72284147	+	0.619588	NA	intron (NM_001024703, intron 1 of 22)	intron (NM_001024703, intron 1 of 22)	22673	NM_001024703	244049	Mm.217412	NM_001024703	ENSMUSG00000032776	Mctp2	Gm489	multiple C2 domains, transmembrane 2	protein-coding
chr4_122930960_122931199	chr4	122930961	122931199	+	0.631292	NA	Intergenic	B2_Mm2|SINE|B2	30108	NM_029662	76574	Mm.331842	NM_029662	ENSMUSG00000028655	Mfsd2a	1700018O18Rik|Mfsd2|NLS1	major facilitator superfamily domain containing 2A	protein-coding
chr4_122930932_122931255	chr4	122930933	122931255	+	0.611076	NA	Intergenic	B2_Mm2|SINE|B2	30094	NM_029662	76574	Mm.331842	NM_029662	ENSMUSG00000028655	Mfsd2a	1700018O18Rik|Mfsd2|NLS1	major facilitator superfamily domain containing 2A	protein-coding
chr12_105022703_105023184	chr12	105022704	105023184	+	0.60682	NA	Intergenic	Intergenic	8197	NR_037229	100526471		NR_037229		Mir3069	mmu-mir-3069	microRNA 3069	ncRNA
chr8_108890850_108891372	chr8	108890851	108891372	+	0.626954	NA	intron (NM_007496, intron 4 of 9)	(CAGA)n|Simple_repeat|Simple_repeat	-45749	NR_037295	100526511		NR_037295		Mir3108	mmu-mir-3108	microRNA 3108	ncRNA
chr14_102828474_102828924	chr14	102828475	102828924	+	0.588744	NA	Intergenic	Intergenic	153933	NR_039592	100628599		NR_039592	miRBase:MI0018042	Mir5130	mmu-mir-5130|mu-mir-5130	microRNA 5130	ncRNA
chr6_83392196_83392971	chr6	83392197	83392971	+	0.766826	NA	intron (NM_183138, intron 3 of 10)	intron (NM_183138, intron 3 of 10)	8518	NR_105793	102465194		NR_105793		Mir6374	mmu-mir-6374	microRNA mir-6374	ncRNA
chrX_53379431_53379829	chrX	53379432	53379829	+	0.662563	NA	Intergenic	Intergenic	-9071	NR_110964	70380	Mm.491083	NM_027409	ENSMUSG00000023074	Mospd1	1810018L05Rik	motile sperm domain containing 1	protein-coding
chr10_24291512_24292084	chr10	24291513	24292084	+	0.588507	NA	intron (NM_021509, intron 10 of 11)	intron (NM_021509, intron 10 of 11)	68281	NM_021509	59012	Mm.285934	NM_021509	ENSMUSG00000020000	Moxd1	3230402N08Rik|MNCb-5203	monooxygenase, DBH-like 1	protein-coding
chr1_51514289_51515019	chr1	51514290	51515019	+	0.79447	NA	Intergenic	Intergenic	-36255	NM_028696	109019	Mm.196290	NM_028696	ENSMUSG00000026107	Nabp1	4930434H03Rik|4930442A21Rik|4930488J04Rik|4933440J18Rik|5830411E10Rik|AI852561|Nbp1|Obfc2a|Ssb2	nucleic acid binding protein 1	protein-coding
chr2_52319180_52319426	chr2	52319181	52319426	+	0.681932	NA	intron (NM_010889, intron 10 of 156)	intron (NM_010889, intron 10 of 156)	19495	NM_010889	17996	Mm.389247	NM_010889	ENSMUSG00000026950	Neb	AI595938	nebulin	protein-coding
chr2_52319162_52319699	chr2	52319163	52319699	+	0.659646	NA	intron (NM_010889, intron 10 of 156)	intron (NM_010889, intron 10 of 156)	19367	NM_010889	17996	Mm.389247	NM_010889	ENSMUSG00000026950	Neb	AI595938	nebulin	protein-coding
chr2_52315754_52316218	chr2	52315755	52316218	+	0.658419	NA	TTS (NR_040620)	TTS (NR_040620)	22812	NM_010889	17996	Mm.389247	NM_010889	ENSMUSG00000026950	Neb	AI595938	nebulin	protein-coding
chr2_52318959_52319728	chr2	52318960	52319728	+	0.633382	NA	intron (NM_010889, intron 10 of 156)	intron (NM_010889, intron 10 of 156)	19454	NM_010889	17996	Mm.389247	NM_010889	ENSMUSG00000026950	Neb	AI595938	nebulin	protein-coding
chr16_55582865_55583434	chr16	55582866	55583434	+	0.768457	NA	Intergenic	Intergenic	238988	NM_001159394	80859	Mm.247272	NM_030612	ENSMUSG00000035356	Nfkbiz	AA408868|INAP|Mail	nuclear factor of kappa light polypeptide gene enhancer in B cells inhibitor, zeta	protein-coding
chr16_55582470_55583434	chr16	55582471	55583434	+	0.711834	NA	Intergenic	Intergenic	239186	NM_001159394	80859	Mm.247272	NM_030612	ENSMUSG00000035356	Nfkbiz	AA408868|INAP|Mail	nuclear factor of kappa light polypeptide gene enhancer in B cells inhibitor, zeta	protein-coding
chr6_120122826_120123273	chr6	120122827	120123273	+	0.725501	NA	intron (NM_016718, intron 1 of 3)	L1M3|LINE|L1	29670	NM_016718	29862	Mm.103668	NM_016718	ENSMUSG00000041377	Ninj2	-	ninjurin 2	protein-coding
chr10_61538040_61538439	chr10	61538041	61538439	+	0.682067	NA	intron (NM_153542, intron 3 of 4)	MTEb|LTR|ERVL-MaLR	-57244	NM_001177511	237362	Mm.131297	NM_001177511	ENSMUSG00000020090	Npffr1	Gm236|Gpr147|NPFF1|OT7T022	neuropeptide FF receptor 1	protein-coding
chr12_89950044_89950535	chr12	89950045	89950535	+	0.682798	NA	intron (NM_001252074, intron 1 of 6)	intron (NM_001252074, intron 1 of 6)	137807	NM_001252074	18191	Mm.425766	NM_172544	ENSMUSG00000066392	Nrxn3	-	neurexin III	protein-coding
chr12_89954522_89954841	chr12	89954523	89954841	+	0.60885	NA	intron (NM_001252074, intron 1 of 6)	intron (NM_001252074, intron 1 of 6)	142199	NM_001252074	18191	Mm.425766	NM_172544	ENSMUSG00000066392	Nrxn3	-	neurexin III	protein-coding
chr11_32013428_32014054	chr11	32013429	32014054	+	0.78205	NA	intron (NM_001290681, intron 2 of 4)	intron (NM_001290681, intron 2 of 4)	12464	NM_001290681	18197	Mm.3304	NM_008741	ENSMUSG00000020297	Nsg2	-	neuron specific gene family member 2	protein-coding
chr11_32013024_32013861	chr11	32013025	32013861	+	0.660811	NA	intron (NM_001290681, intron 2 of 4)	intron (NM_001290681, intron 2 of 4)	12166	NM_001290681	18197	Mm.3304	NM_008741	ENSMUSG00000020297	Nsg2	-	neuron specific gene family member 2	protein-coding
chr16_55891377_55891726	chr16	55891378	55891726	+	0.613062	NA	intron (NM_001134457, intron 1 of 5)	intron (NM_001134457, intron 1 of 5)	3727	NM_001134457	385658	Mm.310635	NM_001134457	ENSMUSG00000075033	Nxpe3	Fam55c|Gm1752|Gm611	neurexophilin and PC-esterase domain family, member 3	protein-coding
chr11_87936381_87936730	chr11	87936382	87936730	+	0.782289	NA	Intergenic	B1_Mur4|SINE|Alu	-21553	NM_146412	258407	Mm.271337	NM_146412	ENSMUSG00000060787	Olfr464	MOR240-2	olfactory receptor 464	protein-coding
chr11_4235728_4237061	chr11	4235729	4237061	+	0.671039	NA	promoter-TSS (NM_001013365)	promoter-TSS (NM_001013365)	-390	NM_001013365	18413	Mm.131422	NM_001013365	ENSMUSG00000058755	Osm	OncoM	oncostatin M	protein-coding
chr11_4236070_4237055	chr11	4236071	4237055	+	0.627282	NA	promoter-TSS (NM_001013365)	promoter-TSS (NM_001013365)	-222	NM_001013365	18413	Mm.131422	NM_001013365	ENSMUSG00000058755	Osm	OncoM	oncostatin M	protein-coding
chr3_60821483_60821894	chr3	60821484	60821894	+	0.624055	NA	Intergenic	MTD|LTR|ERVL-MaLR	-181096	NM_008772	18441	Mm.281452	NM_008772	ENSMUSG00000027765	P2ry1	P2Y1	purinergic receptor P2Y, G-protein coupled 1	protein-coding
chr19_53791724_53792843	chr19	53791725	53792843	+	0.605398	NA	intron (NM_001170847, intron 1 of 13)	intron (NM_001170847, intron 1 of 13)	-99947	NM_011050	18569	Mm.1605	NM_011050	ENSMUSG00000024975	Pdcd4	D19Ucla1|Ma3|Tis	programmed cell death 4	protein-coding
chr2_76219613_76219907	chr2	76219614	76219907	+	0.684142	NA	intron (NM_001081033, intron 2 of 19)	intron (NM_001081033, intron 2 of 19)	118893	NM_001081033	241489	Mm.246613	NM_001081033		Pde11a	6330414F14Rik|A630086N24Rik|Gm350|PDE11A1	phosphodiesterase 11A	protein-coding
chr2_76219418_76219942	chr2	76219419	76219942	+	0.626267	NA	intron (NM_001081033, intron 2 of 19)	intron (NM_001081033, intron 2 of 19)	118973	NM_001081033	241489	Mm.246613	NM_001081033		Pde11a	6330414F14Rik|A630086N24Rik|Gm350|PDE11A1	phosphodiesterase 11A	protein-coding
chr3_30965598_30966342	chr3	30965599	30966342	+	0.608164	NA	intron (NM_001165954, intron 1 of 14)	intron (NM_001165954, intron 1 of 14)	3445	NM_001165954	241915	Mm.233173	NM_153421	ENSMUSG00000037652	Phc3	E030046K01Rik|Edr3|Hph3	polyhomeotic-like 3 (Drosophila)	protein-coding
chr17_29500634_29501279	chr17	29500635	29501279	+	0.700984	NA	Intergenic	Intergenic	9912	NM_008842	18712	Mm.405293	NM_008842		Pim1	Pim-1	proviral integration site 1	protein-coding
chr2_59171560_59172058	chr2	59171561	59172058	+	0.664179	NA	intron (NM_026361, intron 1 of 21)	intron (NM_026361, intron 1 of 21)	10959	NM_175464	227937	Mm.260938	NM_026361	ENSMUSG00000026991	Pkp4	5031422I09Rik|9430019K17Rik|Armrp|p0071	plakophilin 4	protein-coding
chr2_59171568_59171921	chr2	59171569	59171921	+	0.656482	NA	intron (NM_026361, intron 1 of 21)	intron (NM_026361, intron 1 of 21)	10895	NM_175464	227937	Mm.260938	NM_026361	ENSMUSG00000026991	Pkp4	5031422I09Rik|9430019K17Rik|Armrp|p0071	plakophilin 4	protein-coding
chr2_59171246_59172068	chr2	59171247	59172068	+	0.634375	NA	intron (NM_026361, intron 1 of 21)	intron (NM_026361, intron 1 of 21)	10807	NM_175464	227937	Mm.260938	NM_026361	ENSMUSG00000026991	Pkp4	5031422I09Rik|9430019K17Rik|Armrp|p0071	plakophilin 4	protein-coding
chr2_59171380_59171950	chr2	59171381	59171950	+	0.625394	NA	intron (NM_026361, intron 1 of 21)	intron (NM_026361, intron 1 of 21)	10815	NM_175464	227937	Mm.260938	NM_026361	ENSMUSG00000026991	Pkp4	5031422I09Rik|9430019K17Rik|Armrp|p0071	plakophilin 4	protein-coding
chr2_11173085_11173457	chr2	11173086	11173457	+	0.659105	NA	intron (NM_008859, intron 1 of 17)	intron (NM_008859, intron 1 of 17)	889	NM_008859	18761	Mm.329993	NM_008859	ENSMUSG00000026778	Prkcq	A130035A12Rik|AW494342|PKC-0|PKC-theta|PKCtheta|Pkcq	protein kinase C, theta	protein-coding
chr13_85498608_85499003	chr13	85498609	85499003	+	0.590259	NA	Intergenic	Intergenic	-209320	NM_145452	218397	Mm.259653	NM_145452	ENSMUSG00000021549	Rasa1	Gap|RasGAP|Rasa	RAS p21 protein activator 1	protein-coding
chr17_50097790_50098343	chr17	50097791	50098343	+	0.587408	NA	intron (NM_181397, intron 3 of 9)	intron (NM_181397, intron 3 of 9)	92430	NM_181397	76438	Mm.41854	NM_181397		Rftn1	2310015N21Rik|AI853526	raftlin lipid raft linker 1	protein-coding
chr14_104519057_104519487	chr14	104519058	104519487	+	0.594683	NA	intron (NM_026047, intron 1 of 5)	ORR1D2-int|LTR|ERVL-MaLR	3394	NM_026047	72486	Mm.291811	NM_026047	ENSMUSG00000022120	Rnf219	2610206B13Rik|2810449K13Rik|AI451544	ring finger protein 219	protein-coding
chr7_114171284_114172183	chr7	114171285	114172183	+	0.639695	NA	Intergenic	Intergenic	-53953	NM_025846	66922	Mm.276572	NM_025846	ENSMUSG00000055723	Rras2	2610016H24Rik|C86394|TC21	related RAS viral (r-ras) oncogene homolog 2	protein-coding
chr10_61675995_61676335	chr10	61675996	61676335	+	0.619957	NA	Intergenic	RLTR30E_MM|LTR|ERV1	-4156	NM_009120	20224	Mm.391794	NM_009120	ENSMUSG00000020088	Sar1a	1600019H17Rik|Sara|Sara1	SAR1 gene homolog A (S. cerevisiae)	protein-coding
chr1_80015311_80015841	chr1	80015312	80015841	+	0.597272	NA	Intergenic	L2|LINE|L2	-156911	NM_009255	20720	Mm.3093	NM_009255	ENSMUSG00000026249	Serpine2	B230326M24Rik|PAI-1|PI-7|PI7|PN-1|Spi4	serine (or cysteine) peptidase inhibitor, clade E, member 2	protein-coding
chr18_79459488_79460007	chr18	79459489	79460007	+	0.955102	NA	Intergenic	Intergenic	-350357	NM_053099	240427	Mm.312871	NM_053099	ENSMUSG00000024548	Setbp1	C130092E12|Seb|mKIAA0437	SET binding protein 1	protein-coding
chr18_79434525_79435241	chr18	79434526	79435241	+	0.698228	NA	Intergenic	Intergenic	-325492	NM_053099	240427	Mm.312871	NM_053099	ENSMUSG00000024548	Setbp1	C130092E12|Seb|mKIAA0437	SET binding protein 1	protein-coding
chr17_53650120_53650607	chr17	53650121	53650607	+	0.673712	NA	intron (NM_020005, intron 9 of 17)	intron (NM_020005, intron 9 of 17)	38951	NM_028232	72415	Mm.153202	NM_028232	ENSMUSG00000023940	Sgol1	3300001M08Rik|C81037|Sgo1	shugoshin-like 1 (S. pombe)	protein-coding
chr14_59694817_59695881	chr14	59694818	59695881	+	0.746441	NA	intron (NM_015803, intron 32 of 35)	intron (NM_015803, intron 32 of 35)	70068	NM_145463	219134	Mm.275409	NM_145463	ENSMUSG00000044461	Shisa2	9430059P22Rik|MAd2|Tmem46|mShisa|shisa	shisa homolog 2 (Xenopus laevis)	protein-coding
chr14_59695192_59695831	chr14	59695193	59695831	+	0.680527	NA	intron (NM_015803, intron 32 of 35)	PB1D7|SINE|Alu	70231	NM_145463	219134	Mm.275409	NM_145463	ENSMUSG00000044461	Shisa2	9430059P22Rik|MAd2|Tmem46|mShisa|shisa	shisa homolog 2 (Xenopus laevis)	protein-coding
chr12_82294937_82295820	chr12	82294938	82295820	+	0.750129	NA	intron (NM_001167983, intron 3 of 23)	intron (NM_001167983, intron 3 of 23)	-15970	NM_172579	217692	Mm.261333	NM_172579	ENSMUSG00000042700	Sipa1l1	4931426N11Rik|AW213287|Spar|mKIAA0440	signal-induced proliferation-associated 1 like 1	protein-coding
chr12_82295326_82295841	chr12	82295327	82295841	+	0.690842	NA	intron (NM_001167983, intron 3 of 23)	intron (NM_001167983, intron 3 of 23)	-15765	NM_172579	217692	Mm.261333	NM_172579	ENSMUSG00000042700	Sipa1l1	4931426N11Rik|AW213287|Spar|mKIAA0440	signal-induced proliferation-associated 1 like 1	protein-coding
chr12_82322755_82323106	chr12	82322756	82323106	+	0.613151	NA	intron (NM_172579, intron 1 of 20)	intron (NM_172579, intron 1 of 20)	11582	NM_172579	217692	Mm.261333	NM_172579	ENSMUSG00000042700	Sipa1l1	4931426N11Rik|AW213287|Spar|mKIAA0440	signal-induced proliferation-associated 1 like 1	protein-coding
chr12_82322824_82323437	chr12	82322825	82323437	+	0.597632	NA	intron (NM_172579, intron 1 of 20)	intron (NM_172579, intron 1 of 20)	11782	NM_172579	217692	Mm.261333	NM_172579	ENSMUSG00000042700	Sipa1l1	4931426N11Rik|AW213287|Spar|mKIAA0440	signal-induced proliferation-associated 1 like 1	protein-coding
chr2_122679704_122680505	chr2	122679705	122680505	+	1.01091	NA	Intergenic	Intergenic	22558	NM_011774	22785	Mm.27801	NM_011774	ENSMUSG00000005802	Slc30a4	Znt4|lm|znT-4	solute carrier family 30 (zinc transporter), member 4	protein-coding
chr2_122672669_122673588	chr2	122672670	122673588	+	0.680528	NA	Intergenic	ORR1D2|LTR|ERVL-MaLR	29534	NM_011774	22785	Mm.27801	NM_011774	ENSMUSG00000005802	Slc30a4	Znt4|lm|znT-4	solute carrier family 30 (zinc transporter), member 4	protein-coding
chr19_38395118_38395504	chr19	38395119	38395504	+	0.910601	NA	promoter-TSS (NM_175507)	promoter-TSS (NM_175507)	-669	NM_175507	240660	Mm.262085	NM_175507	ENSMUSG00000044026	Slc35g1	AA590464|D330039I19Rik|Tmem20	solute carrier family 35, member G1	protein-coding
chr1_46864072_46864769	chr1	46864073	46864769	+	0.740001	NA	Intergenic	Intergenic	-10912	NM_172653	227059	Mm.233889	NM_172653	ENSMUSG00000025986	Slc39a10	2900042E17Rik|5430433I10|mKIAA1265	solute carrier family 39 (zinc transporter), member 10	protein-coding
chr19_26641369_26641678	chr19	26641370	26641678	+	0.853144	NA	intron (NM_011416, intron 5 of 32)	intron (NM_011416, intron 5 of 32)	36364	NM_011416	67155	Mm.491146	NM_011416	ENSMUSG00000024921	Smarca2	2610209L14Rik|SNF2alpha|Snf2l2|brahma|brm	SWI/SNF related, matrix associated, actin dependent regulator of chromatin, subfamily a, member 2	protein-coding
chr16_11577248_11578354	chr16	11577249	11578354	+	0.586139	NA	intron (NM_001290148, intron 8 of 13)	intron (NM_001290148, intron 8 of 13)	172153	NM_001290148	74478	Mm.325831	NM_028964	ENSMUSG00000071669	Snx29	4933437K13Rik|ENSMUSG00000079738|Gm11170|Gm1737|Gm930|Rundc2a	sorting nexin 29	protein-coding
chr11_62148181_62149063	chr11	62148182	62149063	+	1.15396	NA	intron (NM_001281818, intron 9 of 14)	intron (NM_001281818, intron 9 of 14)	71598	NM_001029936	432572	Mm.458025	NM_001029936	ENSMUSG00000042331	Specc1	2810012G08Rik|B230396K10Rik|Cytsb	sperm antigen with calponin homology and coiled-coil domains 1	protein-coding
chr5_54070594_54070918	chr5	54070595	54070918	+	0.716338	NA	intron (NM_001081103, intron 2 of 11)	intron (NM_001081103, intron 2 of 11)	72233	NM_001081103	116873	Mm.265985	NM_054083	ENSMUSG00000039156	Stim2	-	stromal interaction molecule 2	protein-coding
chr5_54067631_54067938	chr5	54067632	54067938	+	0.587571	NA	intron (NM_001081103, intron 2 of 11)	L1MEc|LINE|L1	69262	NM_001081103	116873	Mm.265985	NM_054083	ENSMUSG00000039156	Stim2	-	stromal interaction molecule 2	protein-coding
chr12_105019262_105019794	chr12	105019263	105019794	+	0.655259	NA	Intergenic	Intergenic	-9719	NM_172500	212073	Mm.212688	NM_172500	ENSMUSG00000054150	Syne3	nesprin-3	spectrin repeat containing, nuclear envelope family member 3	protein-coding
chr6_52801790_52802789	chr6	52801791	52802789	+	0.617957	NA	intron (NM_173406, intron 3 of 4)	intron (NM_173406, intron 3 of 4)	88561	NM_025816	52440	Mm.389757	NM_025816	ENSMUSG00000004535	Tax1bp1	1200003J11Rik|1700069J21Rik|AA930106|D6Ertd404e|D6Ertd772e|T6bp|TXBP151	Tax1 (human T cell leukemia virus type I) binding protein 1	protein-coding
chr3_21965407_21965959	chr3	21965408	21965959	+	0.922694	NA	Intergenic	Intergenic	-110969	NM_030732	81004	Mm.202966	NM_030732	ENSMUSG00000027630	Tbl1xr1	8030499H02Rik|A630076E03Rik|AW539987|C21|C230089I12Rik|DC42|Ira1|TBLR1	transducin (beta)-like 1X-linked receptor 1	protein-coding
chr11_117881853_117882231	chr11	117881854	117882231	+	0.685261	NA	Intergenic	Intergenic	-8516	NM_027919	71776	Mm.3200	NM_027919	ENSMUSG00000017713	Tha1	1300017K07Rik|GLY1	threonine aldolase 1	protein-coding
chr11_117879072_117879313	chr11	117879073	117879313	+	0.659174	NA	Intergenic	Intergenic	-5667	NM_027919	71776	Mm.3200	NM_027919	ENSMUSG00000017713	Tha1	1300017K07Rik|GLY1	threonine aldolase 1	protein-coding
chr6_59312928_59313891	chr6	59312929	59313891	+	0.593323	NA	Intergenic	RLTR14_RN|LTR|ERV1	104540	NM_001081145	68140	Mm.25843	NM_001081145	ENSMUSG00000049232	Tigd2	3632410O17Rik	tigger transposable element derived 2	protein-coding
chr5_3669510_3670721	chr5	3669511	3670721	+	0.62201	NA	exon (NM_029154, exon 8 of 11)	exon (NM_029154, exon 8 of 11)	13112	NM_029154	75010	Mm.85064	NM_029141	ENSMUSG00000014529	Tmbim7	4930403J02Rik|4930500J03Rik|4930511M11Rik|Lgf5|Tmbim1b	transmembrane BAX inhibitor motif containing 7	protein-coding
chr19_21051101_21051368	chr19	21051102	21051368	+	0.691023	NA	Intergenic	Intergenic	-97033	NM_028953	13409	Mm.219585	NM_028953	ENSMUSG00000024749	Tmc1	4933416G09Rik|Beethoven|Bth|CWEA1|dn	transmembrane channel-like gene family 1	protein-coding
chr19_21051066_21051687	chr19	21051067	21051687	+	0.658762	NA	Intergenic	Intergenic	-97175	NM_028953	13409	Mm.219585	NM_028953	ENSMUSG00000024749	Tmc1	4933416G09Rik|Beethoven|Bth|CWEA1|dn	transmembrane channel-like gene family 1	protein-coding
chr1_51092371_51092706	chr1	51092372	51092706	+	0.773696	NA	intron (NM_019790, intron 5 of 9)	intron (NM_019790, intron 5 of 9)	165016	NM_019790	56363	Mm.245154	NM_019790	ENSMUSG00000026109	Tmeff2	4832418D20Rik|7630402F16Rik|TR-2	transmembrane protein with EGF-like and two follistatin-like domains 2	protein-coding
chr1_36892379_36892960	chr1	36892380	36892960	+	0.640591	NA	intron (NM_018872, intron 1 of 40)	MTEa|LTR|ERVL-MaLR	46857	NM_018872	56030	Mm.186943	NM_018872	ENSMUSG00000026116	Tmem131	2610524E03Rik|CC28|D1Bwg0491e|Neg|RW1|YR-23|mKIAA0257	transmembrane protein 131	protein-coding
chr9_123271591_123272147	chr9	123271592	123272147	+	0.660123	NA	Intergenic	Lx2|LINE|L1	-11080	NM_001002267	72309	Mm.8569	NM_001002267	ENSMUSG00000054871	Tmem158	2310037P21Rik|Ris1	transmembrane protein 158	protein-coding
chr4_63841786_63842938	chr4	63841787	63842938	+	0.598879	NA	intron (NM_009403, intron 2 of 3)	intron (NM_009403, intron 2 of 3)	18922	NM_009403	21949	Mm.4664	NM_009403		Tnfsf8	CD153|CD30LG|Cd30l	tumor necrosis factor (ligand) superfamily, member 8	protein-coding
chr12_28735238_28736135	chr12	28735239	28736135	+	0.58676	NA	intron (NM_178811, intron 3 of 11)	intron (NM_178811, intron 3 of 11)	14707	NM_001161410	217449	Mm.132006	NM_178811	ENSMUSG00000020628	Trappc12	CGI-87|D930014A20Rik|Ttc15	trafficking protein particle complex 12	protein-coding
chr6_41202893_41203503	chr6	41202894	41203503	+	0.683062	NA	Intergenic	Intergenic	-99074	NM_011646	22074	Mm.383263	NM_011646	ENSMUSG00000054106	Try4	0910001B19Rik|Td	trypsin 4	protein-coding
chr9_66616813_66617168	chr9	66616814	66617168	+	0.724345	NA	Intergenic	Intergenic	-24011	NM_144937	235441	Mm.38976	NM_144937	ENSMUSG00000032376	Usp3	AA409661|BC017156	ubiquitin specific peptidase 3	protein-coding
chr9_66616835_66617502	chr9	66616836	66617502	+	0.720467	NA	Intergenic	Intergenic	-24189	NM_144937	235441	Mm.38976	NM_144937	ENSMUSG00000032376	Usp3	AA409661|BC017156	ubiquitin specific peptidase 3	protein-coding
chr9_66616872_66617303	chr9	66616873	66617303	+	0.716338	NA	Intergenic	Intergenic	-24108	NM_144937	235441	Mm.38976	NM_144937	ENSMUSG00000032376	Usp3	AA409661|BC017156	ubiquitin specific peptidase 3	protein-coding
chr2_6338083_6338603	chr2	6338084	6338603	+	0.669914	NA	intron (NM_001080548, intron 2 of 14)	intron (NM_001080548, intron 2 of 14)	-14393	NM_181399	98910	Mm.40673	NM_181399	ENSMUSG00000039046	Usp6nl	AI316785|RNTRE|TRE2NL|mKIAA0019	USP6 N-terminal like	protein-coding
chr2_6337866_6338618	chr2	6337867	6338618	+	0.662231	NA	intron (NM_001080548, intron 2 of 14)	intron (NM_001080548, intron 2 of 14)	-14494	NM_181399	98910	Mm.40673	NM_181399	ENSMUSG00000039046	Usp6nl	AI316785|RNTRE|TRE2NL|mKIAA0019	USP6 N-terminal like	protein-coding
chr12_84525017_84525837	chr12	84525018	84525837	+	0.743931	NA	intron (NM_173756, intron 5 of 5)	B4|SINE|B4	-44425	NM_007701	12677	Mm.4405	NM_007701	ENSMUSG00000021239	Vsx2	Chx10|Hox-10|Hox10|or	visual system homeobox 2	protein-coding
chr16_32520432_32520900	chr16	32520433	32520900	+	0.713872	NA	Intergenic	Intergenic	24385	NM_199309	245308	Mm.76859	NM_199309	ENSMUSG00000052363	Zdhhc19	Gm1744|Gm616	zinc finger, DHHC domain containing 19	protein-coding
chr16_32520117_32521039	chr16	32520118	32521039	+	0.710355	NA	Intergenic	Intergenic	24297	NM_199309	245308	Mm.76859	NM_199309	ENSMUSG00000052363	Zdhhc19	Gm1744|Gm616	zinc finger, DHHC domain containing 19	protein-coding
chr16_18233481_18233802	chr16	18233482	18233802	+	0.676592	NA	intron (NM_172151, intron 1 of 10)	intron (NM_172151, intron 1 of 10)	1494	NM_172151	27801	Mm.326263	NM_172151	ENSMUSG00000060166	Zdhhc8	D16H22S1738E|DHHC-8|E330009O14Rik|Op53c05|ZDHHCL1	zinc finger, DHHC domain containing 8	protein-coding
chr5_105859149_105859701	chr5	105859150	105859701	+	0.631	NA	Intergenic	Intergenic	-17143	NR_030777	54367	Mm.248876	NM_018759	ENSMUSG00000029290	Zfp326	5730470H14Rik|ZAN75|Znf326	zinc finger protein 326	protein-coding
chr9_65831225_65831684	chr9	65831226	65831684	+	0.739415	NA	3' UTR (NM_001170907, exon 12 of 12)	3' UTR (NM_001170907, exon 12 of 12)	-3891	NM_172536	214812	Mm.139231	NM_172536	ENSMUSG00000040524	Zfp609	9830165N24|BC016271|Znf609|mKIAA0295	zinc finger protein 609	protein-coding
chr11_95748121_95748792	chr11	95748122	95748792	+	0.668623	NA	promoter-TSS (NM_201609)	promoter-TSS (NM_201609)	-610	NM_201609	268469	Mm.389038	NM_201609	ENSMUSG00000075595	Zfp652	9530033F24Rik|ZNF652	zinc finger protein 652	protein-coding
chr5_109996131_109996814	chr5	109996132	109996814	+	1.23067	NA	promoter-TSS (NM_145563)	promoter-TSS (NM_145563)	-54	NM_145563	69504	Mm.441438	NM_145563	ENSMUSG00000066613	Zfp932	2310001H12Rik|Znf431	zinc finger protein 932	protein-coding
chr2_165877959_165878431	chr2	165877960	165878431	+	0.632331	NA	5' UTR (NM_001291158, exon 1 of 24)	5' UTR (NM_001291158, exon 1 of 24)	242	NM_001291158	228880	Mm.227598	NM_027230	ENSMUSG00000039671	Zmynd8	1110013E22Rik|2010005I16Rik|3632413B07Rik|AI316811|AL024039|Prkcbp1|RACK7	zinc finger, MYND-type containing 8	protein-coding
chr2_165877689_165878431	chr2	165877690	165878431	+	0.599773	NA	5' UTR (NM_001291158, exon 1 of 24)	5' UTR (NM_001291158, exon 1 of 24)	377	NM_001291158	228880	Mm.227598	NM_027230	ENSMUSG00000039671	Zmynd8	1110013E22Rik|2010005I16Rik|3632413B07Rik|AI316811|AL024039|Prkcbp1|RACK7	zinc finger, MYND-type containing 8	protein-coding

## Sheet: Table S1B
Table S1B. HOMER Opening peaks in Ag-stimulated cells Data is sorted alphabetically by the gene name; Only peaks above the peak score value of 0.5 are shown.
PeakID (cmd=annotatePeaks.pl ../averagescore_opening_peaks_allCA.bed mm10 -go go_opening_peaks_allCA)	Chr	Start	End	Strand	Peak Score	Focus Ratio/Region Size	Annotation	Detailed Annotation	Distance to TSS	Nearest PromoterID	Entrez ID	Nearest Unigene	Nearest Refseq	Nearest Ensembl	Gene Name	Gene Alias	Gene Description	Gene Type
chr12_85823551_85823931	chr12	85823552	85823931	+	1.3124	NA	intron (NM_021446, intron 1 of 4)	intron (NM_021446, intron 1 of 4)	804	NM_021446	58520	Mm.143795	NM_021446	ENSMUSG00000021252	0610007P14Rik	1190004E09Rik|AU019315|C77855|ORF11	RIKEN cDNA 0610007P14 gene	protein-coding
chr8_77435979_77436662	chr8	77435980	77436662	+	1.17372	NA	intron (NM_030113, intron 3 of 22)	intron (NM_030113, intron 3 of 22)	-80735	NR_028125	70345	Mm.411813	NR_028125	ENSMUSG00000097882	0610038B21Rik	-	RIKEN cDNA 0610038B21 gene	ncRNA
chr8_77210190_77210775	chr8	77210191	77210775	+	1.09747	NA	intron (NM_001083906, intron 6 of 8)	intron (NM_001083906, intron 6 of 8)	-306573	NR_028125	70345	Mm.411813	NR_028125	ENSMUSG00000097882	0610038B21Rik	-	RIKEN cDNA 0610038B21 gene	ncRNA
chr8_77307237_77307578	chr8	77307238	77307578	+	0.904463	NA	intron (NM_030113, intron 19 of 22)	L1VL4|LINE|L1	-209648	NR_028125	70345	Mm.411813	NR_028125	ENSMUSG00000097882	0610038B21Rik	-	RIKEN cDNA 0610038B21 gene	ncRNA
chr8_77508935_77509462	chr8	77508936	77509462	+	0.783472	NA	intron (NM_030113, intron 1 of 22)	intron (NM_030113, intron 1 of 22)	-7857	NR_028125	70345	Mm.411813	NR_028125	ENSMUSG00000097882	0610038B21Rik	-	RIKEN cDNA 0610038B21 gene	ncRNA
chr8_77309029_77309646	chr8	77309030	77309646	+	0.763863	NA	intron (NM_030113, intron 19 of 22)	intron (NM_030113, intron 19 of 22)	-207718	NR_028125	70345	Mm.411813	NR_028125	ENSMUSG00000097882	0610038B21Rik	-	RIKEN cDNA 0610038B21 gene	ncRNA
chr8_77262364_77262819	chr8	77262365	77262819	+	0.751566	NA	intron (NM_030113, intron 20 of 22)	ORR1D1|LTR|ERVL-MaLR	-254464	NR_028125	70345	Mm.411813	NR_028125	ENSMUSG00000097882	0610038B21Rik	-	RIKEN cDNA 0610038B21 gene	ncRNA
chr8_77498195_77498682	chr8	77498196	77498682	+	0.655832	NA	intron (NM_030113, intron 1 of 22)	intron (NM_030113, intron 1 of 22)	-18617	NR_028125	70345	Mm.411813	NR_028125	ENSMUSG00000097882	0610038B21Rik	-	RIKEN cDNA 0610038B21 gene	ncRNA
chr8_77433259_77433686	chr8	77433260	77433686	+	0.646763	NA	intron (NM_030113, intron 3 of 22)	intron (NM_030113, intron 3 of 22)	-83583	NR_028125	70345	Mm.411813	NR_028125	ENSMUSG00000097882	0610038B21Rik	-	RIKEN cDNA 0610038B21 gene	ncRNA
chr8_77401201_77401495	chr8	77401202	77401495	+	0.624122	NA	intron (NM_030113, intron 10 of 22)	intron (NM_030113, intron 10 of 22)	-115708	NR_028125	70345	Mm.411813	NR_028125	ENSMUSG00000097882	0610038B21Rik	-	RIKEN cDNA 0610038B21 gene	ncRNA
chr2_163639791_163640028	chr2	163639792	163640028	+	0.773356	NA	intron (NM_012032, intron 1 of 9)	B1_Mur1|SINE|Alu	-4940	NR_028113	68386	Mm.410649	NR_028113	ENSMUSG00000058812	0610039K10Rik	-	RIKEN cDNA 0610039K10 gene	ncRNA
chr6_108665465_108666001	chr6	108665466	108666001	+	1.67297	NA	3' UTR (NM_011498, exon 5 of 5)	3' UTR (NM_011498, exon 5 of 5)	-4799	NR_104577	75394	Mm.395061	NR_040757	ENSMUSG00000087341	0610040F04Rik	-	RIKEN cDNA 0610040F04 gene	ncRNA
chr6_108672126_108672489	chr6	108672127	108672489	+	1.29769	NA	Intergenic	L1MB5|LINE|L1	-11374	NR_104577	75394	Mm.395061	NR_040757	ENSMUSG00000087341	0610040F04Rik	-	RIKEN cDNA 0610040F04 gene	ncRNA
chr6_108688167_108688975	chr6	108688168	108688975	+	1.27154	NA	Intergenic	Intergenic	-27637	NR_104577	75394	Mm.395061	NR_040757	ENSMUSG00000087341	0610040F04Rik	-	RIKEN cDNA 0610040F04 gene	ncRNA
chr6_108569376_108569996	chr6	108569377	108569996	+	1.09305	NA	Intergenic	Intergenic	53481	NR_040757	75394	Mm.395061	NR_040757	ENSMUSG00000087341	0610040F04Rik	-	RIKEN cDNA 0610040F04 gene	ncRNA
chr6_108706073_108706389	chr6	108706074	108706389	+	0.965052	NA	Intergenic	Intergenic	-45297	NR_104577	75394	Mm.395061	NR_040757	ENSMUSG00000087341	0610040F04Rik	-	RIKEN cDNA 0610040F04 gene	ncRNA
chr6_108710765_108710966	chr6	108710766	108710966	+	0.76599	NA	Intergenic	B3A|SINE|B2	-49932	NR_104577	75394	Mm.395061	NR_040757	ENSMUSG00000087341	0610040F04Rik	-	RIKEN cDNA 0610040F04 gene	ncRNA
chr6_108558064_108558269	chr6	108558065	108558269	+	0.746463	NA	Intergenic	ORR1C2|LTR|ERVL-MaLR	65000	NR_040757	75394	Mm.395061	NR_040757	ENSMUSG00000087341	0610040F04Rik	-	RIKEN cDNA 0610040F04 gene	ncRNA
chr6_108709415_108710337	chr6	108709416	108710337	+	0.62445	NA	Intergenic	Intergenic	-48942	NR_104577	75394	Mm.395061	NR_040757	ENSMUSG00000087341	0610040F04Rik	-	RIKEN cDNA 0610040F04 gene	ncRNA
chr5_115629713_115630043	chr5	115629714	115630043	+	1.61598	NA	Intergenic	Intergenic	1938	NR_027810	66123	Mm.133063	NM_021417		1110006O24Rik	-	RIKEN cDNA 1110006O24 gene	ncRNA
chr5_115629107_115630043	chr5	115629108	115630043	+	1.52384	NA	Intergenic	Intergenic	2241	NR_027810	66123	Mm.133063	NM_021417		1110006O24Rik	-	RIKEN cDNA 1110006O24 gene	ncRNA
chr3_68828604_68828964	chr3	68828605	68828964	+	1.07632	NA	Intergenic	Intergenic	-40802	NM_001167996	68725	Mm.45741	NM_001167996	ENSMUSG00000046999	1110032F04Rik	AI115547	RIKEN cDNA 1110032F04 gene	protein-coding
chr3_68927654_68928126	chr3	68927655	68928126	+	0.987194	NA	intron (NM_026641, intron 12 of 19)	intron (NM_026641, intron 12 of 19)	58304	NM_001167996	68725	Mm.45741	NM_001167996	ENSMUSG00000046999	1110032F04Rik	AI115547	RIKEN cDNA 1110032F04 gene	protein-coding
chr3_68829794_68830510	chr3	68829795	68830510	+	0.739682	NA	Intergenic	Intergenic	-39434	NM_001167996	68725	Mm.45741	NM_001167996	ENSMUSG00000046999	1110032F04Rik	AI115547	RIKEN cDNA 1110032F04 gene	protein-coding
chr3_68786280_68786582	chr3	68786281	68786582	+	0.686288	NA	Intergenic	Intergenic	-83155	NM_001167996	68725	Mm.45741	NM_001167996	ENSMUSG00000046999	1110032F04Rik	AI115547	RIKEN cDNA 1110032F04 gene	protein-coding
chr2_132703647_132704434	chr2	132703648	132704434	+	0.84092	NA	intron (NM_028637, intron 2 of 2)	intron (NM_028637, intron 2 of 2)	13758	NM_028637	73747	Mm.284114	NM_028637	ENSMUSG00000044991	1110034G24Rik	-	RIKEN cDNA 1110034G24 gene	protein-coding
chr2_132688638_132688911	chr2	132688639	132688911	+	0.827393	NA	Intergenic	L1M4|LINE|L1	-1508	NM_028637	73747	Mm.284114	NM_028637	ENSMUSG00000044991	1110034G24Rik	-	RIKEN cDNA 1110034G24 gene	protein-coding
chr2_132645397_132645654	chr2	132645398	132645654	+	0.688431	NA	intron (NR_033468, intron 4 of 5)	ORR1B1|LTR|ERVL-MaLR	-44757	NM_028637	73747	Mm.284114	NM_028637	ENSMUSG00000044991	1110034G24Rik	-	RIKEN cDNA 1110034G24 gene	protein-coding
chr2_132688409_132689108	chr2	132688410	132689108	+	0.676368	NA	Intergenic	L1M4|LINE|L1	-1524	NM_028637	73747	Mm.284114	NM_028637	ENSMUSG00000044991	1110034G24Rik	-	RIKEN cDNA 1110034G24 gene	protein-coding
chr2_132702198_132702523	chr2	132702199	132702523	+	0.65461	NA	intron (NM_028637, intron 2 of 2)	B1F|SINE|Alu	12078	NM_028637	73747	Mm.284114	NM_028637	ENSMUSG00000044991	1110034G24Rik	-	RIKEN cDNA 1110034G24 gene	protein-coding
chr1_24045593_24046020	chr1	24045594	24046020	+	0.86093	NA	intron (NM_026604, intron 10 of 20)	intron (NM_026604, intron 10 of 20)	-40167	NM_026503	68002	Mm.250424	NM_026503	ENSMUSG00000026154	1110058L19Rik	1700001E18Rik|C6orf57	RIKEN cDNA 1110058L19 gene	protein-coding
chr1_24045354_24046042	chr1	24045355	24046042	+	0.755787	NA	intron (NM_026604, intron 10 of 20)	intron (NM_026604, intron 10 of 20)	-40058	NM_026503	68002	Mm.250424	NM_026503	ENSMUSG00000026154	1110058L19Rik	1700001E18Rik|C6orf57	RIKEN cDNA 1110058L19 gene	protein-coding
chr19_21643752_21644304	chr19	21643753	21644304	+	0.857118	NA	intron (NM_025423, intron 1 of 3)	intron (NM_025423, intron 1 of 3)	8763	NM_025423	66206	Mm.272430	NM_025423	ENSMUSG00000035171	1110059E24Rik	-	RIKEN cDNA 1110059E24 gene	protein-coding
chr19_21643979_21644298	chr19	21643980	21644298	+	0.774982	NA	intron (NM_025423, intron 1 of 3)	intron (NM_025423, intron 1 of 3)	8652	NM_025423	66206	Mm.272430	NM_025423	ENSMUSG00000035171	1110059E24Rik	-	RIKEN cDNA 1110059E24 gene	protein-coding
chr9_94411137_94412005	chr9	94411138	94412005	+	0.961184	NA	Intergenic	Intergenic	126510	NM_001033145	68861	Mm.258746	NM_001033145	ENSMUSG00000045414	1190002N15Rik	GoPro49|HASF	RIKEN cDNA 1190002N15 gene	protein-coding
chr11_73036935_73037293	chr11	73036936	73037293	+	0.65271	NA	intron (NM_018883, intron 11 of 15)	intron (NM_018883, intron 11 of 15)	-10753	NM_025818	66874	Mm.41903	NM_025818		1200014J11Rik	C130061O14Rik|C78393	RIKEN cDNA 1200014J11 gene	protein-coding
chr16_21793382_21793758	chr16	21793383	21793758	+	0.697129	NA	promoter-TSS (NR_037958)	promoter-TSS (NR_037958)	-777	NR_037958	100043489	Mm.326535	NR_037957	ENSMUSG00000097290	1300002E11Rik	1500026P21Rik	RIKEN cDNA 1300002E11 gene	ncRNA
chr19_20424138_20424510	chr19	20424139	20424510	+	0.78697	NA	Intergenic	Intergenic	19036	NR_045817	68994	Mm.261028	NM_183277	ENSMUSG00000094732	1500015L24Rik	-	RIKEN cDNA 1500015L24 gene	ncRNA
chr1_43766292_43766749	chr1	43766293	43766749	+	1.80481	NA	intron (NM_026430, intron 9 of 14)	intron (NM_026430, intron 9 of 14)	35919	NM_024283	78896	Mm.50109	NM_024283	ENSMUSG00000026051	1500015O10Rik	Ecrg4	RIKEN cDNA 1500015O10 gene	protein-coding
chr1_43675389_43676038	chr1	43675390	43676038	+	0.866079	NA	Intergenic	Intergenic	-54888	NM_024283	78896	Mm.50109	NM_024283	ENSMUSG00000026051	1500015O10Rik	Ecrg4	RIKEN cDNA 1500015O10 gene	protein-coding
chr1_43767873_43768267	chr1	43767874	43768267	+	0.775162	NA	intron (NM_026430, intron 9 of 14)	intron (NM_026430, intron 9 of 14)	37468	NM_024283	78896	Mm.50109	NM_024283	ENSMUSG00000026051	1500015O10Rik	Ecrg4	RIKEN cDNA 1500015O10 gene	protein-coding
chr16_95897855_95898471	chr16	95897856	95898471	+	1.42016	NA	intron (NR_040485, intron 1 of 3)	Tigger7|DNA|TcMar-Tigger	550	NR_040485	69776	Mm.120470	NR_040484	ENSMUSG00000086899	1600002D24Rik	-	RIKEN cDNA 1600002D24 gene	ncRNA
chr6_86547238_86547675	chr6	86547239	86547675	+	1.16262	NA	intron (NR_037961, intron 3 of 4)	intron (NR_037961, intron 3 of 4)	20056	NR_037961	72012	Mm.349174	NR_037960	ENSMUSG00000097048	1600020E01Rik	-	RIKEN cDNA 1600020E01 gene	ncRNA
chr6_86547829_86548415	chr6	86547830	86548415	+	0.76419	NA	intron (NR_037961, intron 3 of 4)	intron (NR_037961, intron 3 of 4)	20721	NR_037961	72012	Mm.349174	NR_037960	ENSMUSG00000097048	1600020E01Rik	-	RIKEN cDNA 1600020E01 gene	ncRNA
chr17_47462798_47463261	chr17	47462799	47463261	+	0.781931	NA	intron (NM_145489, intron 2 of 4)	RSINE1|SINE|B4	-25655	NM_029296	75462	Mm.46129	NM_029296	ENSMUSG00000047150	1700001C19Rik	-	RIKEN cDNA 1700001C19 gene	protein-coding
chr8_61316378_61316744	chr8	61316379	61316744	+	0.705055	NA	intron (NM_021506, intron 2 of 11)	intron (NM_021506, intron 2 of 11)	-27689	NR_045475	69279	Mm.417857	NR_045475		1700001D01Rik	-	RIKEN cDNA 1700001D01 gene	ncRNA
chr19_53199336_53199947	chr19	53199337	53199947	+	1.079	NA	intron (NM_013758, intron 1 of 15)	intron (NM_013758, intron 1 of 15)	55563	NR_036590	69319	Mm.57452	NR_036590		1700001K23Rik	-	RIKEN cDNA 1700001K23 gene	ncRNA
chr19_53219113_53219690	chr19	53219114	53219690	+	1.07182	NA	intron (NM_001164100, intron 2 of 13)	MLT1F|LTR|ERVL-MaLR	35803	NR_036590	69319	Mm.57452	NR_036590		1700001K23Rik	-	RIKEN cDNA 1700001K23 gene	ncRNA
chr19_53217390_53217826	chr19	53217391	53217826	+	0.771085	NA	intron (NM_001164100, intron 2 of 13)	URR1B|DNA|hAT-Charlie	37597	NR_036590	69319	Mm.57452	NR_036590		1700001K23Rik	-	RIKEN cDNA 1700001K23 gene	ncRNA
chrX_95778203_95778507	chrX	95778204	95778507	+	0.719085	NA	intron (NM_001034907, intron 2 of 8)	intron (NM_001034907, intron 2 of 8)	-45094	NM_029590	76386	Mm.443249	NM_029590	ENSMUSG00000071721	1700010D01Rik	-	RIKEN cDNA 1700010D01 gene	protein-coding
chr17_9002395_9002803	chr17	9002396	9002803	+	0.674459	NA	intron (NM_025851, intron 7 of 9)	intron (NM_025851, intron 7 of 9)	14266	NM_025851	66931	Mm.67591	NM_025851	ENSMUSG00000023873	1700010I14Rik	-	RIKEN cDNA 1700010I14 gene	protein-coding
chr8_79150540_79151126	chr8	79150541	79151126	+	1.79638	NA	intron (NM_001294279, intron 8 of 14)	intron (NM_001294279, intron 8 of 14)	97750	NM_026315	67687	Mm.178707	NM_026315	ENSMUSG00000031682	1700011L22Rik	-	RIKEN cDNA 1700011L22 gene	protein-coding
chr8_79161212_79162135	chr8	79161213	79162135	+	1.13587	NA	intron (NM_001294279, intron 8 of 14)	ORR1D2|LTR|ERVL-MaLR	86909	NM_026315	67687	Mm.178707	NM_026315	ENSMUSG00000031682	1700011L22Rik	-	RIKEN cDNA 1700011L22 gene	protein-coding
chr8_79162824_79163272	chr8	79162825	79163272	+	1.07509	NA	intron (NM_001294279, intron 8 of 14)	intron (NM_001294279, intron 8 of 14)	85535	NM_026315	67687	Mm.178707	NM_026315	ENSMUSG00000031682	1700011L22Rik	-	RIKEN cDNA 1700011L22 gene	protein-coding
chr8_79243492_79243867	chr8	79243493	79243867	+	0.8431	NA	intron (NM_026315, intron 1 of 5)	L1MC3|LINE|L1	4903	NM_026315	67687	Mm.178707	NM_026315	ENSMUSG00000031682	1700011L22Rik	-	RIKEN cDNA 1700011L22 gene	protein-coding
chr8_79155510_79156022	chr8	79155511	79156022	+	0.595707	NA	intron (NM_001294279, intron 8 of 14)	intron (NM_001294279, intron 8 of 14)	92817	NM_026315	67687	Mm.178707	NM_026315	ENSMUSG00000031682	1700011L22Rik	-	RIKEN cDNA 1700011L22 gene	protein-coding
chr9_14772106_14772444	chr9	14772107	14772444	+	1.02346	NA	Intergenic	ORR1A4|LTR|ERVL-MaLR	-1245	NM_029306	69325	Mm.440453	NM_029306	ENSMUSG00000031927	1700012B09Rik	1700007P19Rik	RIKEN cDNA 1700012B09 gene	protein-coding
chr9_14775583_14775851	chr9	14775584	14775851	+	0.620504	NA	Intergenic	L1MA10|LINE|L1	-4687	NM_029306	69325	Mm.440453	NM_029306	ENSMUSG00000031927	1700012B09Rik	1700007P19Rik	RIKEN cDNA 1700012B09 gene	protein-coding
chr10_127670290_127670508	chr10	127670291	127670508	+	0.782918	NA	Intergenic	B3|SINE|B2	3276	NR_045171	72243	Mm.482902	NR_045171	ENSMUSG00000040195	1700012D01Rik	-	RIKEN cDNA 1700012D01 gene	ncRNA
chr15_67413567_67413981	chr15	67413568	67413981	+	0.866147	NA	Intergenic	Intergenic	187005	NR_045140	69334	Mm.63770	NR_045140		1700012I11Rik	-	RIKEN cDNA 1700012I11 gene	ncRNA
chr15_67290896_67291239	chr15	67290897	67291239	+	0.837983	NA	intron (NR_045140, intron 5 of 8)	intron (NR_045140, intron 5 of 8)	64299	NR_045140	69334	Mm.63770	NR_045140		1700012I11Rik	-	RIKEN cDNA 1700012I11 gene	ncRNA
chr15_67290717_67291241	chr15	67290718	67291241	+	0.787448	NA	intron (NR_045140, intron 5 of 8)	intron (NR_045140, intron 5 of 8)	64210	NR_045140	69334	Mm.63770	NR_045140		1700012I11Rik	-	RIKEN cDNA 1700012I11 gene	ncRNA
chr15_67294761_67295090	chr15	67294762	67295090	+	0.647409	NA	intron (NR_045140, intron 5 of 8)	intron (NR_045140, intron 5 of 8)	68157	NR_045140	69334	Mm.63770	NR_045140		1700012I11Rik	-	RIKEN cDNA 1700012I11 gene	ncRNA
chr13_5769585_5770105	chr13	5769586	5770105	+	1.79815	NA	Intergenic	Intergenic	88247	NR_045891	71867	Mm.179181	NR_045891		1700016G22Rik	-	RIKEN cDNA 1700016G22 gene	ncRNA
chr13_5724326_5724725	chr13	5724327	5724725	+	1.55443	NA	Intergenic	Intergenic	133566	NR_045891	71867	Mm.179181	NR_045891		1700016G22Rik	-	RIKEN cDNA 1700016G22 gene	ncRNA
chr13_5767841_5768304	chr13	5767842	5768304	+	1.46619	NA	Intergenic	Intergenic	90019	NR_045891	71867	Mm.179181	NR_045891		1700016G22Rik	-	RIKEN cDNA 1700016G22 gene	ncRNA
chr13_5710986_5711373	chr13	5710987	5711373	+	1.30101	NA	Intergenic	Intergenic	146912	NR_045891	71867	Mm.179181	NR_045891		1700016G22Rik	-	RIKEN cDNA 1700016G22 gene	ncRNA
chr13_5405923_5406463	chr13	5405924	5406463	+	1.2952	NA	Intergenic	Intergenic	451899	NR_045891	71867	Mm.179181	NR_045891		1700016G22Rik	-	RIKEN cDNA 1700016G22 gene	ncRNA
chr13_5674447_5675070	chr13	5674448	5675070	+	1.18734	NA	Intergenic	Intergenic	183333	NR_045891	71867	Mm.179181	NR_045891		1700016G22Rik	-	RIKEN cDNA 1700016G22 gene	ncRNA
chr13_5763555_5763910	chr13	5763556	5763910	+	1.0524	NA	Intergenic	MLT1A|LTR|ERVL-MaLR	94359	NR_045891	71867	Mm.179181	NR_045891		1700016G22Rik	-	RIKEN cDNA 1700016G22 gene	ncRNA
chr13_5787228_5787449	chr13	5787229	5787449	+	1.03313	NA	Intergenic	Intergenic	70753	NR_045891	71867	Mm.179181	NR_045891		1700016G22Rik	-	RIKEN cDNA 1700016G22 gene	ncRNA
chr13_5764464_5764788	chr13	5764465	5764788	+	1.02471	NA	Intergenic	RMER6A|LTR|ERVK	93466	NR_045891	71867	Mm.179181	NR_045891		1700016G22Rik	-	RIKEN cDNA 1700016G22 gene	ncRNA
chr13_5785538_5786114	chr13	5785539	5786114	+	1.01186	NA	Intergenic	Intergenic	72266	NR_045891	71867	Mm.179181	NR_045891		1700016G22Rik	-	RIKEN cDNA 1700016G22 gene	ncRNA
chr13_5717997_5718226	chr13	5717998	5718226	+	0.963891	NA	Intergenic	Intergenic	139980	NR_045891	71867	Mm.179181	NR_045891		1700016G22Rik	-	RIKEN cDNA 1700016G22 gene	ncRNA
chr13_5837281_5837778	chr13	5837282	5837778	+	0.927228	NA	Intergenic	MLT1F1|LTR|ERVL-MaLR	20562	NR_045891	71867	Mm.179181	NR_045891		1700016G22Rik	-	RIKEN cDNA 1700016G22 gene	ncRNA
chr13_5511393_5511834	chr13	5511394	5511834	+	0.910733	NA	Intergenic	Intergenic	346478	NR_045891	71867	Mm.179181	NR_045891		1700016G22Rik	-	RIKEN cDNA 1700016G22 gene	ncRNA
chr13_5601633_5602020	chr13	5601634	5602020	+	0.890798	NA	Intergenic	Intergenic	256265	NR_045891	71867	Mm.179181	NR_045891		1700016G22Rik	-	RIKEN cDNA 1700016G22 gene	ncRNA
chr13_5791861_5792398	chr13	5791862	5792398	+	0.801024	NA	Intergenic	Intergenic	65962	NR_045891	71867	Mm.179181	NR_045891		1700016G22Rik	-	RIKEN cDNA 1700016G22 gene	ncRNA
chr13_5785561_5785768	chr13	5785562	5785768	+	0.785438	NA	Intergenic	LTR40a|LTR|ERVL	72427	NR_045891	71867	Mm.179181	NR_045891		1700016G22Rik	-	RIKEN cDNA 1700016G22 gene	ncRNA
chr13_5773888_5774139	chr13	5773889	5774139	+	0.727732	NA	Intergenic	Intergenic	84078	NR_045891	71867	Mm.179181	NR_045891		1700016G22Rik	-	RIKEN cDNA 1700016G22 gene	ncRNA
chr13_5310096_5310414	chr13	5310097	5310414	+	0.700799	NA	Intergenic	Intergenic	547837	NR_045891	71867	Mm.179181	NR_045891		1700016G22Rik	-	RIKEN cDNA 1700016G22 gene	ncRNA
chr13_5782610_5782859	chr13	5782611	5782859	+	0.697882	NA	Intergenic	Intergenic	75357	NR_045891	71867	Mm.179181	NR_045891		1700016G22Rik	-	RIKEN cDNA 1700016G22 gene	ncRNA
chr13_5511314_5512118	chr13	5511315	5512118	+	0.684784	NA	Intergenic	Intergenic	346376	NR_045891	71867	Mm.179181	NR_045891		1700016G22Rik	-	RIKEN cDNA 1700016G22 gene	ncRNA
chr13_5789316_5789708	chr13	5789317	5789708	+	0.670403	NA	Intergenic	Intergenic	68580	NR_045891	71867	Mm.179181	NR_045891		1700016G22Rik	-	RIKEN cDNA 1700016G22 gene	ncRNA
chr13_5846826_5847250	chr13	5846827	5847250	+	0.64397	NA	Intergenic	Intergenic	11054	NR_045891	71867	Mm.179181	NR_045891		1700016G22Rik	-	RIKEN cDNA 1700016G22 gene	ncRNA
chr1_80404164_80404722	chr1	80404165	80404722	+	1.08749	NA	Intergenic	Lx8|LINE|L1	-41489	NR_040460	72208	Mm.396181	NR_040460		1700016L21Rik	Jr3	RIKEN cDNA 1700016L21 gene	ncRNA
chr1_80447599_80447902	chr1	80447600	80447902	+	0.956167	NA	intron (NR_040460, intron 1 of 2)	intron (NR_040460, intron 1 of 2)	1819	NR_040460	72208	Mm.396181	NR_040460		1700016L21Rik	Jr3	RIKEN cDNA 1700016L21 gene	ncRNA
chr1_80484492_80484812	chr1	80484493	80484812	+	0.8556	NA	Intergenic	Intergenic	38720	NR_040460	72208	Mm.396181	NR_040460		1700016L21Rik	Jr3	RIKEN cDNA 1700016L21 gene	ncRNA
chr1_80496374_80496830	chr1	80496375	80496830	+	0.782955	NA	Intergenic	Intergenic	50670	NR_040460	72208	Mm.396181	NR_040460		1700016L21Rik	Jr3	RIKEN cDNA 1700016L21 gene	ncRNA
chr1_80453924_80454356	chr1	80453925	80454356	+	0.725771	NA	intron (NR_040460, intron 2 of 2)	ORR1E|LTR|ERVL-MaLR	8208	NR_040460	72208	Mm.396181	NR_040460		1700016L21Rik	Jr3	RIKEN cDNA 1700016L21 gene	ncRNA
chr1_80418500_80419131	chr1	80418501	80419131	+	0.681913	NA	Intergenic	Intergenic	-27116	NR_040460	72208	Mm.396181	NR_040460		1700016L21Rik	Jr3	RIKEN cDNA 1700016L21 gene	ncRNA
chr1_80418705_80419092	chr1	80418706	80419092	+	0.680546	NA	Intergenic	MLT2B1|LTR|ERVL	-27033	NR_040460	72208	Mm.396181	NR_040460		1700016L21Rik	Jr3	RIKEN cDNA 1700016L21 gene	ncRNA
chr1_80447151_80447424	chr1	80447152	80447424	+	0.666716	NA	intron (NR_040460, intron 1 of 2)	intron (NR_040460, intron 1 of 2)	1356	NR_040460	72208	Mm.396181	NR_040460		1700016L21Rik	Jr3	RIKEN cDNA 1700016L21 gene	ncRNA
chr1_80405285_80405583	chr1	80405286	80405583	+	0.657278	NA	Intergenic	RMER6C|LTR|ERVK	-40498	NR_040460	72208	Mm.396181	NR_040460		1700016L21Rik	Jr3	RIKEN cDNA 1700016L21 gene	ncRNA
chr19_11129736_11130378	chr19	11129737	11130378	+	1.14127	NA	intron (NM_027058, intron 1 of 6)	intron (NM_027058, intron 1 of 6)	821	NM_027058	69369	Mm.391200	NM_027058	ENSMUSG00000024729	1700017D01Rik	-	RIKEN cDNA 1700017D01 gene	protein-coding
chr4_63643948_63644344	chr4	63643949	63644344	+	1.59601	NA	Intergenic	Intergenic	-21717	NM_029324	75524	Mm.38543	NM_029324	ENSMUSG00000058935	1700018C11Rik	bM230C2.3	RIKEN cDNA 1700018C11 gene	protein-coding
chr4_63636116_63636637	chr4	63636117	63636637	+	1.38872	NA	Intergenic	Intergenic	-13948	NM_029324	75524	Mm.38543	NM_029324	ENSMUSG00000058935	1700018C11Rik	bM230C2.3	RIKEN cDNA 1700018C11 gene	protein-coding
chr4_63639838_63640222	chr4	63639839	63640222	+	1.30805	NA	Intergenic	Intergenic	-17601	NM_029324	75524	Mm.38543	NM_029324	ENSMUSG00000058935	1700018C11Rik	bM230C2.3	RIKEN cDNA 1700018C11 gene	protein-coding
chr4_63668274_63668670	chr4	63668275	63668670	+	1.13505	NA	Intergenic	Intergenic	-46043	NM_029324	75524	Mm.38543	NM_029324	ENSMUSG00000058935	1700018C11Rik	bM230C2.3	RIKEN cDNA 1700018C11 gene	protein-coding
chr4_63668122_63668772	chr4	63668123	63668772	+	1.0688	NA	Intergenic	Intergenic	-46018	NM_029324	75524	Mm.38543	NM_029324	ENSMUSG00000058935	1700018C11Rik	bM230C2.3	RIKEN cDNA 1700018C11 gene	protein-coding
chr4_63644418_63644809	chr4	63644419	63644809	+	0.87485	NA	Intergenic	Intergenic	-22185	NM_029324	75524	Mm.38543	NM_029324	ENSMUSG00000058935	1700018C11Rik	bM230C2.3	RIKEN cDNA 1700018C11 gene	protein-coding
chr4_63627083_63627494	chr4	63627084	63627494	+	0.694463	NA	Intergenic	L1MD2|LINE|L1	-4860	NM_029324	75524	Mm.38543	NM_029324	ENSMUSG00000058935	1700018C11Rik	bM230C2.3	RIKEN cDNA 1700018C11 gene	protein-coding
chr2_46371045_46371404	chr2	46371046	46371404	+	1.31434	NA	Intergenic	Intergenic	674620	NR_040497	69405	Mm.396184	NR_040497	ENSMUSG00000086202	1700019E08Rik	-	RIKEN cDNA 1700019E08 gene	ncRNA
chr2_46370821_46371458	chr2	46370822	46371458	+	1.29154	NA	Intergenic	Intergenic	674535	NR_040497	69405	Mm.396184	NR_040497	ENSMUSG00000086202	1700019E08Rik	-	RIKEN cDNA 1700019E08 gene	ncRNA
chr2_46372845_46373148	chr2	46372846	46373148	+	0.955095	NA	Intergenic	Lx9|LINE|L1	676392	NR_040497	69405	Mm.396184	NR_040497	ENSMUSG00000086202	1700019E08Rik	-	RIKEN cDNA 1700019E08 gene	ncRNA
chr1_86439939_86440213	chr1	86439940	86440213	+	0.839988	NA	Intergenic	Intergenic	13747	NM_027966	71863	Mm.179627	NM_027966	ENSMUSG00000036574	1700019O17Rik	-	RIKEN cDNA 1700019O17 gene	protein-coding
chr2_119596987_119597280	chr2	119596988	119597280	+	1.361	NA	intron (NR_015473, intron 2 of 2)	ORR1B2|LTR|ERVL-MaLR	2838	NR_015473	66602	Mm.379181	NR_015473	ENSMUSG00000085438	1700020I14Rik	1190006L01Rik|4933437I03Rik|AI451541|AI585852|AW538376|AW558897	RIKEN cDNA 1700020I14 gene	ncRNA
chr10_21535264_21536058	chr10	21535265	21536058	+	0.956567	NA	Intergenic	Intergenic	-57484	NR_027968	67692	Mm.54306	NM_183266		1700020N01Rik	-	RIKEN cDNA 1700020N01 gene	ncRNA
chr10_21504468_21504836	chr10	21504469	21504836	+	0.76286	NA	Intergenic	Intergenic	-88493	NR_027968	67692	Mm.54306	NM_183266		1700020N01Rik	-	RIKEN cDNA 1700020N01 gene	ncRNA
chr10_21504150_21504836	chr10	21504151	21504836	+	0.757441	NA	Intergenic	Intergenic	-88652	NR_027968	67692	Mm.54306	NM_183266		1700020N01Rik	-	RIKEN cDNA 1700020N01 gene	ncRNA
chr10_21611886_21612322	chr10	21611887	21612322	+	0.740463	NA	intron (NR_027968, intron 2 of 2)	intron (NR_027968, intron 2 of 2)	18959	NR_027968	67692	Mm.54306	NM_183266		1700020N01Rik	-	RIKEN cDNA 1700020N01 gene	ncRNA
chr10_21504093_21505490	chr10	21504094	21505490	+	0.728501	NA	Intergenic	Intergenic	-88353	NR_027968	67692	Mm.54306	NM_183266		1700020N01Rik	-	RIKEN cDNA 1700020N01 gene	ncRNA
chr10_43519878_43520378	chr10	43519879	43520378	+	0.780635	NA	Intergenic	Intergenic	20866	NM_026411	67851	Mm.209953	NM_026411	ENSMUSG00000019797	1700021F05Rik	-	RIKEN cDNA 1700021F05 gene	protein-coding
chr2_173448497_173449243	chr2	173448498	173449243	+	0.630869	NA	Intergenic	ORR1D1-int|LTR|ERVL-MaLR	-73722	NM_028158	72221	Mm.46132	NM_028158	ENSMUSG00000027518	1700021F07Rik	-	RIKEN cDNA 1700021F07 gene	protein-coding
chr16_32870985_32871213	chr16	32870986	32871213	+	0.648062	NA	Intergenic	B3A|SINE|B2	-2733	NM_172615	100502698	Mm.327319	NM_172615	ENSMUSG00000035629	1700021K19Rik	5330403K09|Kiaa0226|Rubicon|mKIAA0226	RIKEN cDNA 1700021K19 gene	protein-coding
chr5_24629574_24630212	chr5	24629575	24630212	+	0.708712	NA	Intergenic	Intergenic	-15560	NR_003953	72252	Mm.87446	NR_003953	ENSMUSG00000038165	1700022A21Rik	-	glycerol-3-phosphate dehydrogenase 1-like pseudogene	pseudo
chr16_59453977_59454308	chr16	59453978	59454308	+	0.809207	NA	intron (NM_001081190, intron 8 of 8)	ORR1B1|LTR|ERVL-MaLR	15095	NR_040568	75636	Mm.490522	NR_040568		1700022E09Rik	-	RIKEN cDNA 1700022E09 gene	ncRNA
chr1_152015612_152015978	chr1	152015613	152015978	+	0.655281	NA	intron (NM_197990, intron 1 of 5)	intron (NM_197990, intron 1 of 5)	74525	NM_197990	69399	Mm.278031	NM_197990	ENSMUSG00000032666	1700025G04Rik	2610510E02Rik|2900042O04Rik|ENSMUSG00000073540	RIKEN cDNA 1700025G04 gene	protein-coding
chr5_73285638_73285931	chr5	73285639	73285931	+	0.992951	NA	Intergenic	RSINE1|SINE|B4	-1601	NR_040688	72276	Mm.271215	NR_040687		1700025M24Rik	-	RIKEN cDNA 1700025M24 gene	ncRNA
chr5_73285534_73286017	chr5	73285535	73286017	+	0.909317	NA	Intergenic	RSINE1|SINE|B4	-1592	NR_040688	72276	Mm.271215	NR_040687		1700025M24Rik	-	RIKEN cDNA 1700025M24 gene	ncRNA
chr5_73271223_73271624	chr5	73271224	73271624	+	0.870756	NA	intron (NR_040688, intron 3 of 3)	intron (NR_040688, intron 3 of 3)	12760	NR_040687	72276	Mm.271215	NR_040687		1700025M24Rik	-	RIKEN cDNA 1700025M24 gene	ncRNA
chr5_73286525_73287013	chr5	73286526	73287013	+	0.811846	NA	Intergenic	Intergenic	-2585	NR_040688	72276	Mm.271215	NR_040687		1700025M24Rik	-	RIKEN cDNA 1700025M24 gene	ncRNA
chr2_132524539_132525041	chr2	132524540	132525041	+	0.95097	NA	TTS (NR_028286)	TTS (NR_028286)	34062	NR_028286	70371	Mm.394667	NR_028286	ENSMUSG00000086379	1700026D11Rik	-	RIKEN cDNA 1700026D11 gene	ncRNA
chr10_43746613_43746968	chr10	43746614	43746968	+	0.770826	NA	intron (NR_040581, intron 1 of 3)	MTEa|LTR|ERVL-MaLR	633	NR_040581	69443	Mm.484042	NR_040581		1700027J07Rik	-	RIKEN cDNA 1700027J07 gene	ncRNA
chr7_28479993_28480565	chr7	28479994	28480565	+	0.735058	NA	intron (NR_030567, intron 4 of 4)	intron (NR_030567, intron 4 of 4)	-16662	NR_033605	70001	Mm.417851	NR_033605		1700028B04Rik	-	NADH dehydrogenase (ubiquinone) 1 beta subcomplex 8 pseudogene	pseudo
chr5_151374890_151375159	chr5	151374891	151375159	+	1.52111	NA	intron (NR_045700, intron 1 of 3)	intron (NR_045700, intron 1 of 3)	6350	NR_045699	625175	Mm.443286	NR_045699	ENSMUSG00000097321	1700028E10Rik	A630054D14|Gm6561	RIKEN cDNA 1700028E10 gene	ncRNA
chr5_151376409_151376688	chr5	151376410	151376688	+	1.24098	NA	intron (NR_045700, intron 1 of 3)	intron (NR_045700, intron 1 of 3)	7874	NR_045699	625175	Mm.443286	NR_045699	ENSMUSG00000097321	1700028E10Rik	A630054D14|Gm6561	RIKEN cDNA 1700028E10 gene	ncRNA
chr5_151412484_151413498	chr5	151412485	151413498	+	1.01184	NA	intron (NR_045700, intron 3 of 3)	intron (NR_045700, intron 3 of 3)	44316	NR_045699	625175	Mm.443286	NR_045699	ENSMUSG00000097321	1700028E10Rik	A630054D14|Gm6561	RIKEN cDNA 1700028E10 gene	ncRNA
chr5_151376946_151377746	chr5	151376947	151377746	+	0.952994	NA	intron (NR_045700, intron 1 of 3)	L2c|LINE|L2	8671	NR_045699	625175	Mm.443286	NR_045699	ENSMUSG00000097321	1700028E10Rik	A630054D14|Gm6561	RIKEN cDNA 1700028E10 gene	ncRNA
chr10_82794991_82795694	chr10	82794992	82795694	+	1.02531	NA	Intergenic	Intergenic	-16780	NR_038042	70003	Mm.48789	NR_038042	ENSMUSG00000056821	1700028I16Rik	-	RIKEN cDNA 1700028I16 gene	ncRNA
chr10_82798556_82798912	chr10	82798557	82798912	+	1.01396	NA	Intergenic	Intergenic	-13389	NR_038042	70003	Mm.48789	NR_038042	ENSMUSG00000056821	1700028I16Rik	-	RIKEN cDNA 1700028I16 gene	ncRNA
chr10_82796632_82797487	chr10	82796633	82797487	+	1.00858	NA	Intergenic	Intergenic	-15063	NR_038042	70003	Mm.48789	NR_038042	ENSMUSG00000056821	1700028I16Rik	-	RIKEN cDNA 1700028I16 gene	ncRNA
chr10_82807262_82807545	chr10	82807263	82807545	+	0.612813	NA	Intergenic	L2|LINE|L2	-4719	NR_038042	70003	Mm.48789	NR_038042	ENSMUSG00000056821	1700028I16Rik	-	RIKEN cDNA 1700028I16 gene	ncRNA
chr5_107528520_107529192	chr5	107528521	107529192	+	0.994173	NA	Intergenic	MLTR18_MM|LTR|ERVK	-5855	NM_182745	76421	Mm.67037	NM_175241	ENSMUSG00000089798	1700028K03Rik	-	RIKEN cDNA 1700028K03 gene	protein-coding
chr8_13602094_13602657	chr8	13602095	13602657	+	0.741965	NA	intron (NM_009025, intron 4 of 23)	intron (NM_009025, intron 4 of 23)	-39915	NM_001080781	66501	Mm.46136	NM_025601	ENSMUSG00000031452	1700029H14Rik	-	RIKEN cDNA 1700029H14 gene	protein-coding
chr2_92379842_92380206	chr2	92379843	92380206	+	0.67891	NA	intron (NR_028114, intron 9 of 10)	intron (NR_028114, intron 9 of 10)	-2894	NM_183112	75641	Mm.330409	NM_183112	ENSMUSG00000044916	1700029I15Rik	1700021K07Rik	RIKEN cDNA 1700029I15 gene	protein-coding
chr13_44469614_44470201	chr13	44469615	44470201	+	1.03336	NA	Intergenic	Intergenic	30181	NR_045489	69491	Mm.392410	NR_045489	ENSMUSG00000098144	1700029N11Rik	-	RIKEN cDNA 1700029N11 gene	ncRNA
chr3_136431305_136431836	chr3	136431306	136431836	+	0.982427	NA	Intergenic	Intergenic	17778	NR_040592	70055	Mm.261063	NR_040592		1700030L20Rik	-	RIKEN cDNA 1700030L20 gene	ncRNA
chr3_40903031_40903805	chr3	40903032	40903805	+	1.06129	NA	promoter-TSS (NR_045380)	promoter-TSS (NR_045380)	-875	NR_045380	73297	Mm.422673	NM_028494	ENSMUSG00000074619	1700034I23Rik	-	FUN14 domain containing 2 pseudogene	pseudo
chr6_146959874_146960544	chr6	146959875	146960544	+	0.798166	NA	intron (NM_001170433, intron 2 of 27)	intron (NM_001170433, intron 2 of 27)	-5788	NM_028509	73344	Mm.391543	NM_028509	ENSMUSG00000040163	1700034J05Rik	-	RIKEN cDNA 1700034J05 gene	protein-coding
chr6_146963793_146964085	chr6	146963794	146964085	+	0.704383	NA	intron (NM_001170433, intron 2 of 27)	intron (NM_001170433, intron 2 of 27)	-9518	NM_028509	73344	Mm.391543	NM_028509	ENSMUSG00000040163	1700034J05Rik	-	RIKEN cDNA 1700034J05 gene	protein-coding
chr10_68558250_68558742	chr10	68558251	68558742	+	1.07531	NA	Intergenic	Intergenic	-16621	NM_028491	73287	Mm.141830	NM_028491	ENSMUSG00000019945	1700040L02Rik	-	RIKEN cDNA 1700040L02 gene	protein-coding
chr10_68512393_68512859	chr10	68512394	68512859	+	0.629234	NA	intron (NM_028491, intron 4 of 7)	RMER15|LTR|ERVL	29249	NM_028491	73287	Mm.141830	NM_028491	ENSMUSG00000019945	1700040L02Rik	-	RIKEN cDNA 1700040L02 gene	protein-coding
chr16_76762761_76763284	chr16	76762762	76763284	+	1.45361	NA	Intergenic	Intergenic	247858	NR_040573	76601	Mm.396217	NR_040573		1700041M19Rik	-	RIKEN cDNA 1700041M19 gene	ncRNA
chr16_76900948_76901483	chr16	76900949	76901483	+	1.00762	NA	Intergenic	Intergenic	109665	NR_040573	76601	Mm.396217	NR_040573		1700041M19Rik	-	RIKEN cDNA 1700041M19 gene	ncRNA
chr16_76900841_76901688	chr16	76900842	76901688	+	0.880205	NA	Intergenic	Intergenic	109616	NR_040573	76601	Mm.396217	NR_040573		1700041M19Rik	-	RIKEN cDNA 1700041M19 gene	ncRNA
chr16_76763777_76764057	chr16	76763778	76764057	+	0.704915	NA	Intergenic	Intergenic	246964	NR_040573	76601	Mm.396217	NR_040573		1700041M19Rik	-	RIKEN cDNA 1700041M19 gene	ncRNA
chr4_150799503_150799792	chr4	150799504	150799792	+	0.773772	NA	Intergenic	Intergenic	55301	NR_040649	73348	Mm.396218	NR_040649	ENSMUSG00000078492	1700045H11Rik	-	RIKEN cDNA 1700045H11 gene	ncRNA
chr4_150807996_150809672	chr4	150807997	150809672	+	0.695487	NA	Intergenic	Intergenic	46115	NR_040649	73348	Mm.396218	NR_040649	ENSMUSG00000078492	1700045H11Rik	-	RIKEN cDNA 1700045H11 gene	ncRNA
chr4_150808376_150808897	chr4	150808377	150808897	+	0.660288	NA	Intergenic	Intergenic	46312	NR_040649	73348	Mm.396218	NR_040649	ENSMUSG00000078492	1700045H11Rik	-	RIKEN cDNA 1700045H11 gene	ncRNA
chr6_100479356_100480438	chr6	100479357	100480438	+	0.999459	NA	Intergenic	Intergenic	-47503	NR_040525	73395	Mm.69413	NR_040525		1700049E22Rik	-	RIKEN cDNA 1700049E22 gene	ncRNA
chr19_53060175_53060600	chr19	53060176	53060600	+	1.02575	NA	Intergenic	MTB_Mm|LTR|ERVL-MaLR	-15864	NR_045320	78457	Mm.76932	NR_045320		1700054A03Rik	-	RIKEN cDNA 1700054A03 gene	ncRNA
chr1_183933879_183934278	chr1	183933880	183934278	+	0.926651	NA	Intergenic	Intergenic	99919	NM_028516	73363	Mm.50115	NM_028516	ENSMUSG00000044854	1700056E22Rik	-	RIKEN cDNA 1700056E22 gene	protein-coding
chr1_183933805_183934381	chr1	183933806	183934381	+	0.867421	NA	Intergenic	Intergenic	99905	NM_028516	73363	Mm.50115	NM_028516	ENSMUSG00000044854	1700056E22Rik	-	RIKEN cDNA 1700056E22 gene	protein-coding
chr1_183964171_183964526	chr1	183964172	183964526	+	0.866707	NA	Intergenic	Intergenic	69649	NM_028516	73363	Mm.50115	NM_028516	ENSMUSG00000044854	1700056E22Rik	-	RIKEN cDNA 1700056E22 gene	protein-coding
chr1_183964010_183964536	chr1	183964011	183964536	+	0.788451	NA	Intergenic	Intergenic	69725	NM_028516	73363	Mm.50115	NM_028516	ENSMUSG00000044854	1700056E22Rik	-	RIKEN cDNA 1700056E22 gene	protein-coding
chr1_183788771_183789085	chr1	183788772	183789085	+	0.636868	NA	Intergenic	MER63A|DNA|hAT-Blackjack	245070	NM_028516	73363	Mm.50115	NM_028516	ENSMUSG00000044854	1700056E22Rik	-	RIKEN cDNA 1700056E22 gene	protein-coding
chr6_143871107_143871543	chr6	143871108	143871543	+	0.912489	NA	intron (NM_011444, intron 10 of 14)	intron (NM_011444, intron 10 of 14)	-220037	NR_045732	73425	Mm.417844	NR_045732	ENSMUSG00000086887	1700060C16Rik	-	RIKEN cDNA 1700060C16 gene	ncRNA
chr6_143816340_143816955	chr6	143816341	143816955	+	0.902353	NA	Intergenic	Intergenic	-165360	NR_045732	73425	Mm.417844	NR_045732	ENSMUSG00000086887	1700060C16Rik	-	RIKEN cDNA 1700060C16 gene	ncRNA
chr2_8865356_8865878	chr2	8865357	8865878	+	1.68405	NA	Intergenic	Intergenic	-323898	NR_038180	73438	Mm.23558	NR_038180	ENSMUSG00000085580	1700061F12Rik	-	RIKEN cDNA 1700061F12 gene	ncRNA
chr2_8870099_8870496	chr2	8870100	8870496	+	1.46718	NA	Intergenic	L2|LINE|L2	-319217	NR_038180	73438	Mm.23558	NR_038180	ENSMUSG00000085580	1700061F12Rik	-	RIKEN cDNA 1700061F12 gene	ncRNA
chr2_9359928_9360472	chr2	9359929	9360472	+	1.27185	NA	Intergenic	Intergenic	170685	NR_038180	73438	Mm.23558	NR_038180	ENSMUSG00000085580	1700061F12Rik	-	RIKEN cDNA 1700061F12 gene	ncRNA
chr2_8942399_8942963	chr2	8942400	8942963	+	1.18578	NA	Intergenic	Intergenic	-246834	NR_038180	73438	Mm.23558	NR_038180	ENSMUSG00000085580	1700061F12Rik	-	RIKEN cDNA 1700061F12 gene	ncRNA
chr2_9193058_9193598	chr2	9193059	9193598	+	1.13196	NA	intron (NR_038180, intron 2 of 3)	intron (NR_038180, intron 2 of 3)	3813	NR_038180	73438	Mm.23558	NR_038180	ENSMUSG00000085580	1700061F12Rik	-	RIKEN cDNA 1700061F12 gene	ncRNA
chr2_9294434_9294937	chr2	9294435	9294937	+	0.922482	NA	Intergenic	Intergenic	105171	NR_038180	73438	Mm.23558	NR_038180	ENSMUSG00000085580	1700061F12Rik	-	RIKEN cDNA 1700061F12 gene	ncRNA
chr2_8964908_8965610	chr2	8964909	8965610	+	0.905597	NA	Intergenic	Intergenic	-224256	NR_038180	73438	Mm.23558	NR_038180	ENSMUSG00000085580	1700061F12Rik	-	RIKEN cDNA 1700061F12 gene	ncRNA
chr2_9343171_9343630	chr2	9343172	9343630	+	0.662692	NA	Intergenic	Intergenic	153886	NR_038180	73438	Mm.23558	NR_038180	ENSMUSG00000085580	1700061F12Rik	-	RIKEN cDNA 1700061F12 gene	ncRNA
chr9_41193529_41194195	chr9	41193530	41194195	+	0.653343	NA	Intergenic	MTC|LTR|ERVL-MaLR	-12293	NR_040392	78500	Mm.275715	NR_040392		1700063D05Rik	-	RIKEN cDNA 1700063D05 gene	ncRNA
chr10_119070582_119071354	chr10	119070583	119071354	+	0.895986	NA	Intergenic	URR1A|DNA|hAT-Charlie	-21937	NR_045348	73400	Mm.416864	NR_045348		1700064J06Rik	-	RIKEN cDNA 1700064J06 gene	ncRNA
chr10_119028514_119029061	chr10	119028515	119029061	+	0.870103	NA	Intergenic	Intergenic	-64117	NR_045348	73400	Mm.416864	NR_045348		1700064J06Rik	-	RIKEN cDNA 1700064J06 gene	ncRNA
chr12_99626146_99626522	chr12	99626147	99626522	+	1.6143	NA	intron (NR_045288, intron 1 of 1)	intron (NR_045288, intron 1 of 1)	1640	NR_045288	73457	Mm.383439	NR_045288		1700064M15Rik	-	RIKEN cDNA 1700064M15 gene	ncRNA
chr12_99639153_99639507	chr12	99639154	99639507	+	1.34069	NA	Intergenic	URR1B|DNA|hAT-Charlie	-11356	NR_045288	73457	Mm.383439	NR_045288		1700064M15Rik	-	RIKEN cDNA 1700064M15 gene	ncRNA
chr12_99681500_99682042	chr12	99681501	99682042	+	1.28003	NA	Intergenic	RLTR16B_MM|LTR|ERVK	-53797	NR_045288	73457	Mm.383439	NR_045288		1700064M15Rik	-	RIKEN cDNA 1700064M15 gene	ncRNA
chr12_99686699_99687068	chr12	99686700	99687068	+	1.17521	NA	Intergenic	Intergenic	-58910	NR_045288	73457	Mm.383439	NR_045288		1700064M15Rik	-	RIKEN cDNA 1700064M15 gene	ncRNA
chr12_99610246_99611353	chr12	99610247	99611353	+	0.909886	NA	Intergenic	Intergenic	17174	NR_045288	73457	Mm.383439	NR_045288		1700064M15Rik	-	RIKEN cDNA 1700064M15 gene	ncRNA
chr12_99686510_99687147	chr12	99686511	99687147	+	0.902017	NA	Intergenic	Intergenic	-58855	NR_045288	73457	Mm.383439	NR_045288		1700064M15Rik	-	RIKEN cDNA 1700064M15 gene	ncRNA
chr12_99587300_99587762	chr12	99587301	99587762	+	0.862547	NA	Intergenic	Intergenic	40443	NR_045288	73457	Mm.383439	NR_045288		1700064M15Rik	-	RIKEN cDNA 1700064M15 gene	ncRNA
chr12_99622248_99622633	chr12	99622249	99622633	+	0.727544	NA	Intergenic	URR1A|DNA|hAT-Charlie	5533	NR_045288	73457	Mm.383439	NR_045288		1700064M15Rik	-	RIKEN cDNA 1700064M15 gene	ncRNA
chr12_99633561_99634068	chr12	99633562	99634068	+	0.621436	NA	Intergenic	Intergenic	-5841	NR_045288	73457	Mm.383439	NR_045288		1700064M15Rik	-	RIKEN cDNA 1700064M15 gene	ncRNA
chr9_95869916_95870187	chr9	95869917	95870187	+	0.87854	NA	exon (NM_019864, exon 7 of 47)	exon (NM_019864, exon 7 of 47)	-12170	NM_001271569	73410	Mm.443314	NM_028533		1700065D16Rik	-	RIKEN cDNA 1700065D16 gene	protein-coding
chr1_89015396_89016318	chr1	89015397	89016318	+	0.657942	NA	promoter-TSS (NR_040471)	promoter-TSS (NR_040471)	-256	NR_040471	73475	Mm.491040	NR_040471		1700067G17Rik	-	RIKEN cDNA 1700067G17 gene	ncRNA
chr6_145371666_145371921	chr6	145371667	145371921	+	0.779881	NA	Intergenic	RSINE1|SINE|B4	-15831	NR_003625	381827	Mm.179075	NM_001001987		1700073E17Rik	-	ribosomal protein L7 pseudogene	pseudo
chr13_119654783_119655130	chr13	119654784	119655130	+	0.887248	NA	TTS (NM_020279)	TTS (NM_020279)	-25085	NR_045296	73480	Mm.71100	NR_045296		1700074H08Rik	CH25-211A23.1	RIKEN cDNA 1700074H08 gene	ncRNA
chr13_119681042_119681471	chr13	119681043	119681471	+	0.662595	NA	intron (NR_045296, intron 2 of 2)	intron (NR_045296, intron 2 of 2)	1215	NR_045296	73480	Mm.71100	NR_045296		1700074H08Rik	CH25-211A23.1	RIKEN cDNA 1700074H08 gene	ncRNA
chr1_169917848_169918460	chr1	169917849	169918460	+	0.723833	NA	Intergenic	Intergenic	-10785	NM_001033185	78465	Mm.291078	NM_001033185	ENSMUSG00000070532	1700084C01Rik	-	RIKEN cDNA 1700084C01 gene	protein-coding
chr1_169918033_169918431	chr1	169918034	169918431	+	0.712455	NA	Intergenic	Intergenic	-10707	NM_001033185	78465	Mm.291078	NM_001033185	ENSMUSG00000070532	1700084C01Rik	-	RIKEN cDNA 1700084C01 gene	protein-coding
chr11_23510110_23510784	chr11	23510111	23510784	+	0.929012	NA	Intergenic	MTC-int|LTR|ERVL-MaLR	8748	NM_026105	67358	Mm.87328	NM_026105	ENSMUSG00000020286	1700093K21Rik	-	RIKEN cDNA 1700093K21 gene	protein-coding
chr17_30622908_30623591	chr17	30622909	30623591	+	0.744648	NA	intron (NR_045287, intron 3 of 3)	intron (NR_045287, intron 3 of 3)	3655	NR_045287	67522	Mm.254797	NR_045287		1700097N02Rik	-	RIKEN cDNA 1700097N02 gene	ncRNA
chr6_129545087_129545594	chr6	129545088	129545594	+	1.07061	NA	Intergenic	Intergenic	-12057	NR_045270	100504641	Mm.398286	NR_045270	ENSMUSG00000097675	1700101I11Rik	-	RIKEN cDNA 1700101I11 gene	ncRNA
chr12_54299530_54299948	chr12	54299531	54299948	+	1.22553	NA	Intergenic	Intergenic	66124	NR_108033	73592	Mm.416874	NR_108033		1700104L18Rik	-	RIKEN cDNA 1700104L18 gene	ncRNA
chr12_54299155_54299956	chr12	54299156	54299956	+	1.11286	NA	Intergenic	Intergenic	65941	NR_108033	73592	Mm.416874	NR_108033		1700104L18Rik	-	RIKEN cDNA 1700104L18 gene	ncRNA
chr14_76760462_76760860	chr14	76760463	76760860	+	0.891838	NA	Intergenic	Intergenic	83093	NR_015485	73272	Mm.116804	NR_015485		1700108F19Rik	1700020I02Rik|BB065030	RIKEN cDNA 1700108F19 gene	ncRNA
chr14_76786987_76788135	chr14	76786988	76788135	+	0.871827	NA	Intergenic	Intergenic	109993	NR_015485	73272	Mm.116804	NR_015485		1700108F19Rik	1700020I02Rik|BB065030	RIKEN cDNA 1700108F19 gene	ncRNA
chr14_76787495_76788061	chr14	76787496	76788061	+	0.815995	NA	Intergenic	Intergenic	110210	NR_015485	73272	Mm.116804	NR_015485		1700108F19Rik	1700020I02Rik|BB065030	RIKEN cDNA 1700108F19 gene	ncRNA
chr14_76698857_76699366	chr14	76698858	76699366	+	0.726942	NA	Intergenic	Intergenic	21544	NR_015485	73272	Mm.116804	NR_015485		1700108F19Rik	1700020I02Rik|BB065030	RIKEN cDNA 1700108F19 gene	ncRNA
chr14_61290805_61291316	chr14	61290806	61291316	+	1.07233	NA	Intergenic	Intergenic	14273	NR_033788	67355	Mm.193728	NR_033788		1700109G14Rik	1700126G13Rik	RIKEN cDNA 1700109G14 gene	ncRNA
chr9_40348760_40349202	chr9	40348761	40349202	+	1.72234	NA	intron (NM_172768, intron 2 of 19)	intron (NM_172768, intron 2 of 19)	15509	NR_040728	73558	Mm.398307	NR_040728		1700110K17Rik	-	RIKEN cDNA 1700110K17 gene	ncRNA
chr9_40342026_40342554	chr9	40342027	40342554	+	0.938638	NA	non-coding (NR_040728, exon 2 of 3)	non-coding (NR_040728, exon 2 of 3)	8818	NR_040728	73558	Mm.398307	NR_040728		1700110K17Rik	-	RIKEN cDNA 1700110K17 gene	ncRNA
chr9_40349548_40349835	chr9	40349549	40349835	+	0.819474	NA	intron (NM_172768, intron 2 of 19)	intron (NM_172768, intron 2 of 19)	16220	NR_040728	73558	Mm.398307	NR_040728		1700110K17Rik	-	RIKEN cDNA 1700110K17 gene	ncRNA
chr9_40320957_40321953	chr9	40320958	40321953	+	0.667781	NA	intron (NM_172768, intron 4 of 19)	intron (NM_172768, intron 4 of 19)	-12017	NR_040728	73558	Mm.398307	NR_040728		1700110K17Rik	-	RIKEN cDNA 1700110K17 gene	ncRNA
chr1_184534203_184535232	chr1	184534204	184535232	+	0.896342	NA	intron (NR_040472, intron 2 of 5)	intron (NR_040472, intron 2 of 5)	22973	NR_040472	73590	Mm.82792	NR_040472		1700112H15Rik	-	RIKEN cDNA 1700112H15 gene	ncRNA
chr1_184526341_184526624	chr1	184526342	184526624	+	0.791419	NA	Intergenic	L1MA5|LINE|L1	31208	NR_040472	73590	Mm.82792	NR_040472		1700112H15Rik	-	RIKEN cDNA 1700112H15 gene	ncRNA
chr7_127607011_127607452	chr7	127607012	127607452	+	0.920722	NA	3' UTR (NM_177226, exon 3 of 3)	3' UTR (NM_177226, exon 3 of 3)	-2787	NR_027915	68232	Mm.347960	NM_026628		1700120K04Rik	-	RIKEN cDNA 1700120K04 gene	ncRNA
chr7_127607019_127607803	chr7	127607020	127607803	+	0.784307	NA	3' UTR (NM_177226, exon 3 of 3)	3' UTR (NM_177226, exon 3 of 3)	-2966	NR_027915	68232	Mm.347960	NM_026628		1700120K04Rik	-	RIKEN cDNA 1700120K04 gene	ncRNA
chrX_104760835_104761387	chrX	104760836	104761387	+	0.707417	NA	Intergenic	Intergenic	-55665	NR_045453	76643	Mm.439149	NR_045453		1700121L16Rik	-	RIKEN cDNA 1700121L16 gene	ncRNA
chr17_48034352_48035109	chr17	48034353	48035109	+	0.970466	NA	Intergenic	Intergenic	3562	NM_029689	76651	Mm.76918	NM_029689	ENSMUSG00000094928	1700122O11Rik	-	RIKEN cDNA 1700122O11 gene	protein-coding
chr4_11989920_11990629	chr4	11989921	11990629	+	1.46423	NA	intron (NR_040577, intron 4 of 4)	intron (NR_040577, intron 4 of 4)	23701	NR_040577	100503636	Mm.209078	NR_040577		1700123M08Rik	1600025K15Rik	RIKEN cDNA 1700123M08 gene	ncRNA
chr4_10357540_10357933	chr4	10357541	10357933	+	0.631254	NA	Intergenic	L2c|LINE|L2	440065	NR_045185	73624	Mm.67392	NR_045185	ENSMUSG00000086080	1700123O12Rik	-	RIKEN cDNA 1700123O12 gene	ncRNA
chr19_58629210_58629833	chr19	58629211	58629833	+	0.896424	NA	non-coding (NR_038136, exon 3 of 3)	non-coding (NR_038136, exon 3 of 3)	23193	NR_038136	69055	Mm.396318	NR_038136		1810007D17Rik	-	RIKEN cDNA 1810007D17 gene	ncRNA
chr17_28252473_28252753	chr17	28252474	28252753	+	0.705803	NA	intron (NM_011145, intron 2 of 7)	intron (NM_011145, intron 2 of 7)	-19095	NR_045427	69050	Mm.486938	NR_045427	ENSMUSG00000002250	1810013A23Rik	-	RIKEN cDNA 1810013A23 gene	ncRNA
chr7_73576363_73576694	chr7	73576364	73576694	+	1.1318	NA	Intergenic	RMER17C-int|LTR|ERVK	-18134	NR_037569	69170	Mm.34539	NR_037569		1810026B05Rik	-	RIKEN cDNA 1810026B05 gene	ncRNA
chr7_73576067_73576722	chr7	73576068	73576722	+	1.13153	NA	Intergenic	RMER17C-int|LTR|ERVK	-18000	NR_037569	69170	Mm.34539	NR_037569		1810026B05Rik	-	RIKEN cDNA 1810026B05 gene	ncRNA
chr7_73608926_73609251	chr7	73608927	73609251	+	0.71184	NA	Intergenic	Intergenic	-50694	NR_037569	69170	Mm.34539	NR_037569		1810026B05Rik	-	RIKEN cDNA 1810026B05 gene	ncRNA
chr9_51398875_51399235	chr9	51398876	51399235	+	0.820936	NA	Intergenic	Intergenic	-70138	NM_027217	69809	Mm.75315	NM_027217	ENSMUSG00000036027	1810046K07Rik	-	RIKEN cDNA 1810046K07 gene	protein-coding
chr16_93190890_93191718	chr16	93190891	93191718	+	0.859888	NA	Intergenic	Intergenic	161885	NR_040486	69857	Mm.81192	NR_040486		1810053B23Rik	1810008L18Rik|1810056K14Rik	RIKEN cDNA 1810053B23 gene	ncRNA
chr16_93192588_93192994	chr16	93192589	93192994	+	0.688907	NA	Intergenic	Intergenic	160398	NR_040486	69857	Mm.81192	NR_040486		1810053B23Rik	1810008L18Rik|1810056K14Rik	RIKEN cDNA 1810053B23 gene	ncRNA
chr3_36489226_36489873	chr3	36489227	36489873	+	0.721254	NA	Intergenic	MT2A|LTR|ERVL	13613	NM_028183	72282	Mm.55317	NM_028183	ENSMUSG00000027713	1810062G17Rik	-	RIKEN cDNA 1810062G17 gene	protein-coding
chr14_20543124_20543334	chr14	20543125	20543334	+	1.03336	NA	intron (NM_008914, intron 1 of 13)	B3A|SINE|B2	-3064	NR_033571	75602	Mm.437061	NR_033571	ENSMUSG00000084925	1810062O18Rik	-	RIKEN cDNA 1810062O18 gene	ncRNA
chr9_22214585_22214984	chr9	22214586	22214984	+	0.687121	NA	promoter-TSS (NR_027981)	promoter-TSS (NR_027981)	-925	NR_027981	69862	Mm.488068	NM_001033151		1810064F22Rik	-	RIKEN cDNA 1810064F22 gene	ncRNA
chr9_22214564_22215142	chr9	22214565	22215142	+	0.680761	NA	promoter-TSS (NR_027981)	promoter-TSS (NR_027981)	-993	NR_027981	69862	Mm.488068	NM_001033151		1810064F22Rik	-	RIKEN cDNA 1810064F22 gene	ncRNA
chr18_75279124_75279568	chr18	75279125	75279568	+	0.844334	NA	intron (NM_027727, intron 16 of 16)	intron (NM_027727, intron 16 of 16)	17971	NR_045394	100503117	Mm.250517	NR_045393		2010010A06Rik	5033420E22Rik	RIKEN cDNA 2010010A06 gene	ncRNA
chr18_75263476_75263787	chr18	75263477	75263787	+	0.730151	NA	intron (NM_027727, intron 16 of 16)	intron (NM_027727, intron 16 of 16)	33685	NR_045394	100503117	Mm.250517	NR_045393		2010010A06Rik	5033420E22Rik	RIKEN cDNA 2010010A06 gene	ncRNA
chr18_75250695_75251011	chr18	75250696	75251011	+	0.678087	NA	intron (NM_027727, intron 16 of 16)	intron (NM_027727, intron 16 of 16)	46464	NR_045394	100503117	Mm.250517	NR_045393		2010010A06Rik	5033420E22Rik	RIKEN cDNA 2010010A06 gene	ncRNA
chr6_34971371_34971995	chr6	34971372	34971995	+	0.994509	NA	intron (NM_001025573, intron 2 of 7)	MTB|LTR|ERVL-MaLR	6316	NM_001025573	243753	Mm.440221	NM_001025573	ENSMUSG00000029847	2010107G12Rik	Gm468	RIKEN cDNA 2010107G12 gene	protein-coding
chr5_93207700_93208023	chr5	93207701	93208023	+	0.744639	NA	intron (NM_029363, intron 1 of 2)	intron (NM_029363, intron 1 of 2)	1344	NM_029363	75610	Mm.175502	NM_029363	ENSMUSG00000029384	2010109A12Rik	-	RIKEN cDNA 2010109A12 gene	protein-coding
chr15_74906090_74906947	chr15	74906091	74906947	+	0.76341	NA	Intergenic	MLT2B1|LTR|ERVL	-24815	NM_025929	67038	Mm.154566	NM_025929	ENSMUSG00000063522	2010109I03Rik	-	RIKEN cDNA 2010109I03 gene	protein-coding
chr15_74897383_74898148	chr15	74897384	74898148	+	0.640229	NA	Intergenic	Intergenic	-16062	NM_025929	67038	Mm.154566	NM_025929	ENSMUSG00000063522	2010109I03Rik	-	RIKEN cDNA 2010109I03 gene	protein-coding
chr13_63180517_63181209	chr13	63180518	63181209	+	1.49984	NA	intron (NM_001289926, intron 7 of 15)	intron (NM_001289926, intron 7 of 15)	-59166	NR_110520	72061	Mm.188105	NM_028079	ENSMUSG00000021458	2010111I01Rik	2300006M17Rik|AP-O|Aopep	RIKEN cDNA 2010111I01 gene	protein-coding
chr13_63187089_63188012	chr13	63187090	63188012	+	1.22511	NA	intron (NM_001289926, intron 7 of 15)	intron (NM_001289926, intron 7 of 15)	-52478	NR_110520	72061	Mm.188105	NM_028079	ENSMUSG00000021458	2010111I01Rik	2300006M17Rik|AP-O|Aopep	RIKEN cDNA 2010111I01 gene	protein-coding
chr13_63243646_63243857	chr13	63243647	63243857	+	0.937046	NA	intron (NR_110520, intron 2 of 5)	intron (NR_110520, intron 2 of 5)	3723	NR_110521	72061	Mm.188105	NM_028079	ENSMUSG00000021458	2010111I01Rik	2300006M17Rik|AP-O|Aopep	RIKEN cDNA 2010111I01 gene	protein-coding
chr13_63253050_63253565	chr13	63253051	63253565	+	0.87013	NA	intron (NR_110520, intron 2 of 5)	intron (NR_110520, intron 2 of 5)	13279	NR_110521	72061	Mm.188105	NM_028079	ENSMUSG00000021458	2010111I01Rik	2300006M17Rik|AP-O|Aopep	RIKEN cDNA 2010111I01 gene	protein-coding
chr13_63245892_63246195	chr13	63245893	63246195	+	0.865817	NA	intron (NR_110520, intron 2 of 5)	intron (NR_110520, intron 2 of 5)	6015	NR_110521	72061	Mm.188105	NM_028079	ENSMUSG00000021458	2010111I01Rik	2300006M17Rik|AP-O|Aopep	RIKEN cDNA 2010111I01 gene	protein-coding
chr13_63243597_63243929	chr13	63243598	63243929	+	0.850202	NA	intron (NR_110520, intron 2 of 5)	intron (NR_110520, intron 2 of 5)	3734	NR_110521	72061	Mm.188105	NM_028079	ENSMUSG00000021458	2010111I01Rik	2300006M17Rik|AP-O|Aopep	RIKEN cDNA 2010111I01 gene	protein-coding
chr13_63253913_63254201	chr13	63253914	63254201	+	0.817861	NA	intron (NR_110520, intron 2 of 5)	intron (NR_110520, intron 2 of 5)	14028	NR_110521	72061	Mm.188105	NM_028079	ENSMUSG00000021458	2010111I01Rik	2300006M17Rik|AP-O|Aopep	RIKEN cDNA 2010111I01 gene	protein-coding
chr13_62949903_62950298	chr13	62949904	62950298	+	0.804267	NA	Intergenic	Intergenic	-14792	NM_001289926	72061	Mm.188105	NM_028079	ENSMUSG00000021458	2010111I01Rik	2300006M17Rik|AP-O|Aopep	RIKEN cDNA 2010111I01 gene	protein-coding
chr13_63140851_63141911	chr13	63140852	63141911	+	0.770481	NA	intron (NM_001289926, intron 5 of 15)	intron (NM_001289926, intron 5 of 15)	-98648	NR_110520	72061	Mm.188105	NM_028079	ENSMUSG00000021458	2010111I01Rik	2300006M17Rik|AP-O|Aopep	RIKEN cDNA 2010111I01 gene	protein-coding
chr13_63140870_63141294	chr13	63140871	63141294	+	0.742363	NA	intron (NM_001289926, intron 5 of 15)	intron (NM_001289926, intron 5 of 15)	-98947	NR_110520	72061	Mm.188105	NM_028079	ENSMUSG00000021458	2010111I01Rik	2300006M17Rik|AP-O|Aopep	RIKEN cDNA 2010111I01 gene	protein-coding
chr13_63216520_63217399	chr13	63216521	63217399	+	0.734494	NA	intron (NM_001289926, intron 11 of 15)	intron (NM_001289926, intron 11 of 15)	-23069	NR_110520	72061	Mm.188105	NM_028079	ENSMUSG00000021458	2010111I01Rik	2300006M17Rik|AP-O|Aopep	RIKEN cDNA 2010111I01 gene	protein-coding
chr13_63189729_63189995	chr13	63189730	63189995	+	0.725094	NA	intron (NM_001289926, intron 7 of 15)	intron (NM_001289926, intron 7 of 15)	-50167	NR_110520	72061	Mm.188105	NM_028079	ENSMUSG00000021458	2010111I01Rik	2300006M17Rik|AP-O|Aopep	RIKEN cDNA 2010111I01 gene	protein-coding
chr13_63141315_63141911	chr13	63141316	63141911	+	0.700439	NA	intron (NM_001289926, intron 5 of 15)	intron (NM_001289926, intron 5 of 15)	-98416	NR_110520	72061	Mm.188105	NM_028079	ENSMUSG00000021458	2010111I01Rik	2300006M17Rik|AP-O|Aopep	RIKEN cDNA 2010111I01 gene	protein-coding
chrX_7443915_7444383	chrX	7443916	7444383	+	0.748533	NA	Intergenic	Intergenic	-21161	NR_027924	68355	Mm.45111	NR_027924		2010204K13Rik	0610010M13Rik|Cip7	RIKEN cDNA 2010204K13 gene	ncRNA
chr9_124262832_124264137	chr9	124262833	124264137	+	1.02003	NA	Intergenic	Intergenic	49209	NM_001243118	630836	Mm.458553	NM_001243117		2010315B03Rik	BC029716	RIKEN cDNA 2010315B03 gene	protein-coding
chr9_124263324_124264121	chr9	124263325	124264121	+	0.823158	NA	Intergenic	Intergenic	48971	NM_001243118	630836	Mm.458553	NM_001243117		2010315B03Rik	BC029716	RIKEN cDNA 2010315B03 gene	protein-coding
chr9_124262837_124263245	chr9	124262838	124263245	+	0.720761	NA	Intergenic	Intergenic	49653	NM_001243118	630836	Mm.458553	NM_001243117		2010315B03Rik	BC029716	RIKEN cDNA 2010315B03 gene	protein-coding
chr7_30698743_30699053	chr7	30698744	30699053	+	0.696303	NA	promoter-TSS (NM_026961)	promoter-TSS (NM_026961)	-28	NM_026961	69147	Mm.307035	NM_026961		2200002J24Rik	-	RIKEN cDNA 2200002J24 gene	protein-coding
chr6_41115138_41115552	chr6	41115139	41115552	+	1.51023	NA	Intergenic	Intergenic	-79836	NM_023333	67373	Mm.153729	NM_023333	ENSMUSG00000029882	2210010C04Rik	AV072249	RIKEN cDNA 2210010C04 gene	protein-coding
chr6_41078634_41079255	chr6	41078635	41079255	+	0.98579	NA	Intergenic	Intergenic	-43436	NM_023333	67373	Mm.153729	NM_023333	ENSMUSG00000029882	2210010C04Rik	AV072249	RIKEN cDNA 2210010C04 gene	protein-coding
chr5_114943516_114943929	chr5	114943517	114943929	+	0.66169	NA	intron (NM_028211, intron 1 of 5)	intron (NM_028211, intron 1 of 5)	1521	NM_028211	72357	Mm.292672	NM_028211		2210016L21Rik	-	RIKEN cDNA 2210016L21 gene	protein-coding
chr12_73566436_73566911	chr12	73566437	73566911	+	1.35911	NA	Intergenic	Intergenic	18191	NR_044985	73644	Mm.369885	NR_044985		2210039B01Rik	-	RIKEN cDNA 2210039B01 gene	ncRNA
chr5_148789187_148789612	chr5	148789188	148789612	+	0.791915	NA	Intergenic	Intergenic	47560	NR_028285	70138	Mm.417834	NR_028285	ENSMUSG00000086494	2210417A02Rik	AV081004	RIKEN cDNA 2210417A02 gene	ncRNA
chr6_129224947_129225617	chr6	129224948	129225617	+	1.05103	NA	Intergenic	B3A|SINE|B2	12763	NR_040265	76432	Mm.261738	NR_040265	ENSMUSG00000097354	2310001H17Rik	AI646108	RIKEN cDNA 2310001H17 gene	ncRNA
chr6_129230212_129230691	chr6	129230213	129230691	+	0.912834	NA	Intergenic	Intergenic	7593	NR_040265	76432	Mm.261738	NR_040265	ENSMUSG00000097354	2310001H17Rik	AI646108	RIKEN cDNA 2310001H17 gene	ncRNA
chr6_129236038_129236638	chr6	129236039	129236638	+	0.903658	NA	intron (NR_040268, intron 2 of 3)	intron (NR_040268, intron 2 of 3)	1707	NR_040265	76432	Mm.261738	NR_040265	ENSMUSG00000097354	2310001H17Rik	AI646108	RIKEN cDNA 2310001H17 gene	ncRNA
chr6_129230359_129230626	chr6	129230360	129230626	+	0.820122	NA	Intergenic	Intergenic	7552	NR_040265	76432	Mm.261738	NR_040265	ENSMUSG00000097354	2310001H17Rik	AI646108	RIKEN cDNA 2310001H17 gene	ncRNA
chr6_129211352_129211589	chr6	129211353	129211589	+	0.64718	NA	Intergenic	Intergenic	26574	NR_040265	76432	Mm.261738	NR_040265	ENSMUSG00000097354	2310001H17Rik	AI646108	RIKEN cDNA 2310001H17 gene	ncRNA
chr8_26813132_26813564	chr8	26813133	26813564	+	0.658729	NA	Intergenic	Intergenic	11075	NR_045904	72316	Mm.490534	NR_045904		2310008N11Rik	-	RIKEN cDNA 2310008N11 gene	ncRNA
chr7_27574101_27574535	chr7	27574102	27574535	+	1.36366	NA	intron (NM_175107, intron 7 of 9)	intron (NM_175107, intron 7 of 9)	13842	NM_001122767	66367	Mm.29831	NM_175107	ENSMUSG00000049643	2310022A10Rik	-	RIKEN cDNA 2310022A10 gene	protein-coding
chr7_27573378_27573652	chr7	27573379	27573652	+	0.773699	NA	intron (NM_175107, intron 7 of 9)	intron (NM_175107, intron 7 of 9)	13039	NM_001122767	66367	Mm.29831	NM_175107	ENSMUSG00000049643	2310022A10Rik	-	RIKEN cDNA 2310022A10 gene	protein-coding
chr1_105700895_105701334	chr1	105700896	105701334	+	0.7498	NA	intron (NM_173187, intron 10 of 28)	intron (NM_173187, intron 10 of 28)	37254	NM_173187	227446	Mm.337339	NM_029349	ENSMUSG00000026319	2310035C23Rik	6430401N10|Kiaa1468|mKIAA1468	RIKEN cDNA 2310035C23 gene	protein-coding
chr14_70818913_70819490	chr14	70818914	70819490	+	0.893699	NA	Intergenic	Intergenic	-33731	NR_045939	73648	Mm.410851	NR_045939		2410012E07Rik	-	RIKEN cDNA 2410012E07 gene	ncRNA
chr15_8234083_8234638	chr15	8234084	8234638	+	0.920945	NA	intron (NM_001162906, intron 38 of 52)	LTRIS2|LTR|ERV1	65255	NM_001162906	73692	Mm.164436	NM_001162906	ENSMUSG00000039801	2410089E03Rik	4732468D17Rik|b2b012Clo	RIKEN cDNA 2410089E03 gene	protein-coding
chr4_35006200_35006983	chr4	35006201	35006983	+	1.15898	NA	intron (NM_178061, intron 2 of 3)	intron (NM_178061, intron 2 of 3)	-95111	NR_040652	73696	Mm.1361	NR_040652	ENSMUSG00000085824	2410114N07Rik	-	RIKEN cDNA 2410114N07 gene	ncRNA
chr4_34966687_34966985	chr4	34966688	34966985	+	0.78026	NA	intron (NM_178061, intron 3 of 3)	intron (NM_178061, intron 3 of 3)	-55355	NR_040652	73696	Mm.1361	NR_040652	ENSMUSG00000085824	2410114N07Rik	-	RIKEN cDNA 2410114N07 gene	ncRNA
chr4_35009190_35009485	chr4	35009191	35009485	+	0.779952	NA	intron (NM_178061, intron 2 of 3)	MTD|LTR|ERVL-MaLR	-97857	NR_040652	73696	Mm.1361	NR_040652	ENSMUSG00000085824	2410114N07Rik	-	RIKEN cDNA 2410114N07 gene	ncRNA
chr4_35009562_35009779	chr4	35009563	35009779	+	0.75348	NA	intron (NM_178061, intron 2 of 3)	intron (NM_178061, intron 2 of 3)	-98190	NR_040652	73696	Mm.1361	NR_040652	ENSMUSG00000085824	2410114N07Rik	-	RIKEN cDNA 2410114N07 gene	ncRNA
chr4_34966646_34967070	chr4	34966647	34967070	+	0.683023	NA	intron (NM_178061, intron 3 of 3)	intron (NM_178061, intron 3 of 3)	-55377	NR_040652	73696	Mm.1361	NR_040652	ENSMUSG00000085824	2410114N07Rik	-	RIKEN cDNA 2410114N07 gene	ncRNA
chr5_118361762_118362476	chr5	118361763	118362476	+	1.59026	NA	Intergenic	Intergenic	116892	NM_001081236	76792	Mm.103428	NM_001081236		2410131K14Rik	-	RIKEN cDNA 2410131K14 gene	protein-coding
chr5_118361446_118362504	chr5	118361447	118362504	+	1.43575	NA	Intergenic	Intergenic	116748	NM_001081236	76792	Mm.103428	NM_001081236		2410131K14Rik	-	RIKEN cDNA 2410131K14 gene	protein-coding
chr5_118377442_118377951	chr5	118377443	118377951	+	0.664851	NA	Intergenic	Intergenic	132470	NM_001081236	76792	Mm.103428	NM_001081236		2410131K14Rik	-	RIKEN cDNA 2410131K14 gene	protein-coding
chr5_118375649_118376449	chr5	118375650	118376449	+	0.654919	NA	Intergenic	Intergenic	130822	NM_001081236	76792	Mm.103428	NM_001081236		2410131K14Rik	-	RIKEN cDNA 2410131K14 gene	protein-coding
chr5_118360730_118361033	chr5	118360731	118361033	+	0.649137	NA	Intergenic	Intergenic	115655	NM_001081236	76792	Mm.103428	NM_001081236		2410131K14Rik	-	RIKEN cDNA 2410131K14 gene	protein-coding
chr7_119801017_119801473	chr7	119801018	119801473	+	1.1075	NA	exon (NM_001004187, exon 3 of 13)	exon (NM_001004187, exon 3 of 13)	7058	NM_001004187	434234	Mm.38237	NM_028129	ENSMUSG00000030924	2610020H08Rik	-	RIKEN cDNA 2610020H08 gene	protein-coding
chr7_119800536_119801512	chr7	119800537	119801512	+	0.723942	NA	intron (NM_001004187, intron 2 of 12)	intron (NM_001004187, intron 2 of 12)	6837	NM_001004187	434234	Mm.38237	NM_028129	ENSMUSG00000030924	2610020H08Rik	-	RIKEN cDNA 2610020H08 gene	protein-coding
chr11_113060829_113061480	chr11	113060830	113061480	+	1.06389	NA	intron (NR_015556, intron 2 of 2)	intron (NR_015556, intron 2 of 2)	140683	NR_015556	72386	Mm.266961	NR_015556	ENSMUSG00000087259	2610035D17Rik	-	RIKEN cDNA 2610035D17 gene	ncRNA
chr7_84744462_84744986	chr7	84744463	84744986	+	1.28912	NA	intron (NR_038175, intron 2 of 4)	intron (NR_038175, intron 2 of 4)	55084	NR_038175	72495	Mm.382914	NR_038175		2610206C17Rik	-	RIKEN cDNA 2610206C17 gene	ncRNA
chr7_84741750_84742069	chr7	84741751	84742069	+	0.718626	NA	intron (NR_038175, intron 2 of 4)	L1MC1|LINE|L1	52270	NR_038175	72495	Mm.382914	NR_038175		2610206C17Rik	-	RIKEN cDNA 2610206C17 gene	ncRNA
chr4_10915333_10915595	chr4	10915334	10915595	+	0.791298	NA	Intergenic	Intergenic	40966	NM_026005	67157	Mm.440552	NM_026005	ENSMUSG00000059482	2610301B20Rik	AI428449	RIKEN cDNA 2610301B20 gene	protein-coding
chr13_28855247_28855869	chr13	28855248	28855869	+	0.780218	NA	intron (NR_045053, intron 2 of 8)	MER2|DNA|TcMar-Tigger	29864	NR_045054	72518	Mm.37454	NR_045053		2610307P16Rik	AI666457	RIKEN cDNA 2610307P16 gene	ncRNA
chr3_45377660_45378480	chr3	45377661	45378480	+	0.79853	NA	promoter-TSS (NM_001098172)	promoter-TSS (NM_001098172)	190	NR_045172	72511	Mm.140700	NR_045172	ENSMUSG00000097040	2610316D01Rik	-	RIKEN cDNA 2610316D01 gene	ncRNA
chr8_60915051_60915392	chr8	60915052	60915392	+	1.20902	NA	intron (NM_173874, intron 12 of 13)	intron (NM_173874, intron 12 of 13)	24771	NM_028299	72612	Mm.25263	NM_028299	ENSMUSG00000038005	2700029M09Rik	C230006B22Rik	RIKEN cDNA 2700029M09 gene	protein-coding
chr8_60902122_60902658	chr8	60902123	60902658	+	1.05712	NA	intron (NM_028299, intron 5 of 7)	intron (NM_028299, intron 5 of 7)	11939	NM_028299	72612	Mm.25263	NM_028299	ENSMUSG00000038005	2700029M09Rik	C230006B22Rik	RIKEN cDNA 2700029M09 gene	protein-coding
chr8_60889054_60889364	chr8	60889055	60889364	+	0.924315	NA	Intergenic	Intergenic	-1242	NM_028299	72612	Mm.25263	NM_028299	ENSMUSG00000038005	2700029M09Rik	C230006B22Rik	RIKEN cDNA 2700029M09 gene	protein-coding
chr8_60893802_60894071	chr8	60893803	60894071	+	0.723457	NA	intron (NM_028299, intron 2 of 7)	intron (NM_028299, intron 2 of 7)	3486	NM_028299	72612	Mm.25263	NM_028299	ENSMUSG00000038005	2700029M09Rik	C230006B22Rik	RIKEN cDNA 2700029M09 gene	protein-coding
chr8_60859622_60860049	chr8	60859623	60860049	+	0.671965	NA	Intergenic	Intergenic	-30615	NM_028299	72612	Mm.25263	NM_028299	ENSMUSG00000038005	2700029M09Rik	C230006B22Rik	RIKEN cDNA 2700029M09 gene	protein-coding
chr8_60859619_60860212	chr8	60859620	60860212	+	0.647742	NA	Intergenic	Intergenic	-30535	NM_028299	72612	Mm.25263	NM_028299	ENSMUSG00000038005	2700029M09Rik	C230006B22Rik	RIKEN cDNA 2700029M09 gene	protein-coding
chr12_71144212_71145006	chr12	71144213	71145006	+	1.03365	NA	intron (NM_029818, intron 4 of 27)	Lx9|LINE|L1	7761	NM_001163378	76967	Mm.87290	NM_029818	ENSMUSG00000034601	2700049A03Rik	Talpid3|mKIAA0586	RIKEN cDNA 2700049A03 gene	protein-coding
chr12_71144221_71144769	chr12	71144222	71144769	+	1.02712	NA	intron (NM_029818, intron 4 of 27)	Lx9|LINE|L1	7647	NM_001163378	76967	Mm.87290	NM_029818	ENSMUSG00000034601	2700049A03Rik	Talpid3|mKIAA0586	RIKEN cDNA 2700049A03 gene	protein-coding
chr1_64656435_64656747	chr1	64656436	64656747	+	0.734224	NA	Intergenic	ORR1A2|LTR|ERVL-MaLR	34068	NR_038009	69941	Mm.69044	NR_038009	ENSMUSG00000087213	2810408I11Rik	-	RIKEN cDNA 2810408I11 gene	ncRNA
chr1_64656409_64656927	chr1	64656410	64656927	+	0.664694	NA	Intergenic	Intergenic	33991	NR_038009	69941	Mm.69044	NR_038009	ENSMUSG00000087213	2810408I11Rik	-	RIKEN cDNA 2810408I11 gene	ncRNA
chr6_134903430_134904449	chr6	134903431	134904449	+	0.647218	NA	Intergenic	Intergenic	5979	NR_029441	72813	Mm.409034	NR_029441		2810454H06Rik	-	RIKEN cDNA 2810454H06 gene	ncRNA
chr6_149355008_149355698	chr6	149355009	149355698	+	0.825837	NA	Intergenic	Intergenic	45939	NM_001289662	67246	Mm.333515	NM_026054	ENSMUSG00000032712	2810474O19Rik	6720435I21Rik|AA536804|AU020969|GET|Kiaa1551	RIKEN cDNA 2810474O19 gene	protein-coding
chr6_149355153_149355558	chr6	149355154	149355558	+	0.793464	NA	Intergenic	Intergenic	45942	NM_001289662	67246	Mm.333515	NM_026054	ENSMUSG00000032712	2810474O19Rik	6720435I21Rik|AA536804|AU020969|GET|Kiaa1551	RIKEN cDNA 2810474O19 gene	protein-coding
chr6_149355811_149356217	chr6	149355812	149356217	+	0.737153	NA	Intergenic	RLTR1F_Mm|LTR|ERVK	46600	NM_001289662	67246	Mm.333515	NM_026054	ENSMUSG00000032712	2810474O19Rik	6720435I21Rik|AA536804|AU020969|GET|Kiaa1551	RIKEN cDNA 2810474O19 gene	protein-coding
chr6_149330115_149330775	chr6	149330116	149330775	+	0.685063	NA	intron (NM_026054, intron 3 of 4)	intron (NM_026054, intron 3 of 4)	21031	NM_001289662	67246	Mm.333515	NM_026054	ENSMUSG00000032712	2810474O19Rik	6720435I21Rik|AA536804|AU020969|GET|Kiaa1551	RIKEN cDNA 2810474O19 gene	protein-coding
chr6_149260655_149261274	chr6	149260656	149261274	+	0.664654	NA	Intergenic	Intergenic	-48449	NM_001289661	67246	Mm.333515	NM_026054	ENSMUSG00000032712	2810474O19Rik	6720435I21Rik|AA536804|AU020969|GET|Kiaa1551	RIKEN cDNA 2810474O19 gene	protein-coding
chrX_12124419_12125063	chrX	12124420	12125063	+	0.78107	NA	intron (NM_001168321, intron 1 of 13)	intron (NM_001168321, intron 1 of 13)	35605	NR_045434	72937	Mm.440386	NR_045434	ENSMUSG00000087271	2900008C10Rik	-	RIKEN cDNA 2900008C10 gene	ncRNA
chrX_12129845_12130383	chrX	12129846	12130383	+	0.627256	NA	intron (NM_001168321, intron 1 of 13)	intron (NM_001168321, intron 1 of 13)	30232	NR_045434	72937	Mm.440386	NR_045434	ENSMUSG00000087271	2900008C10Rik	-	RIKEN cDNA 2900008C10 gene	ncRNA
chr18_76034580_76034976	chr18	76034581	76034976	+	0.66528	NA	intron (NM_145356, intron 3 of 4)	MIR|SINE|MIR	63693	NR_045365	73009	Mm.443541	NR_045365		2900057B20Rik	-	RIKEN cDNA 2900057B20 gene	ncRNA
chr1_118458314_118458560	chr1	118458315	118458560	+	0.69046	NA	TTS (NR_027901)	TTS (NR_027901)	828	NR_027901	68204	Mm.443536	NR_027901		2900060B14Rik	-	RIKEN cDNA 2900060B14 gene	ncRNA
chr7_81516169_81517039	chr7	81516170	81517039	+	0.883234	NA	Intergenic	Intergenic	-6946	NR_045299	100504421	Mm.217071	NR_045299	ENSMUSG00000097277	2900076A07Rik	WI1-1616M8.2	RIKEN cDNA 2900076A07 gene	ncRNA
chr9_112546208_112546637	chr9	112546209	112546637	+	1.35716	NA	Intergenic	L1MA6|LINE|L1	289849	NR_033433	620760	Mm.259863	NR_015468	ENSMUSG00000087038	2900079G21Rik	C130083B14|Gm6179	RIKEN cDNA 2900079G21 gene	ncRNA
chr1_120136024_120136819	chr1	120136025	120136819	+	1.39841	NA	intron (NM_001172074, intron 1 of 4)	intron (NM_001172074, intron 1 of 4)	15235	NM_001172074	73103	Mm.271602	NM_028439	ENSMUSG00000026388	3110009E18Rik	-	RIKEN cDNA 3110009E18 gene	protein-coding
chr13_111186854_111187320	chr13	111186855	111187320	+	1.18921	NA	Intergenic	Intergenic	42344	NR_045908	73129	Mm.417826	NR_045908		3110015C05Rik	-	RIKEN cDNA 3110015C05 gene	ncRNA
chr13_111186747_111187394	chr13	111186748	111187394	+	1.00998	NA	Intergenic	Intergenic	42360	NR_045908	73129	Mm.417826	NR_045908		3110015C05Rik	-	RIKEN cDNA 3110015C05 gene	ncRNA
chr13_110960007_110960615	chr13	110960008	110960615	+	0.818807	NA	Intergenic	Intergenic	269120	NR_045908	73129	Mm.417826	NR_045908		3110015C05Rik	-	RIKEN cDNA 3110015C05 gene	ncRNA
chr13_110960170_110960613	chr13	110960171	110960613	+	0.804101	NA	Intergenic	Intergenic	269039	NR_045908	73129	Mm.417826	NR_045908		3110015C05Rik	-	RIKEN cDNA 3110015C05 gene	ncRNA
chr6_119855507_119855904	chr6	119855508	119855904	+	0.863728	NA	Intergenic	Intergenic	7513	NR_030776	67289	Mm.418299	NR_030776	ENSMUSG00000050604	3110021A11Rik	-	RIKEN cDNA 3110021A11 gene	ncRNA
chr9_41439321_41439942	chr9	41439322	41439942	+	0.959602	NA	Intergenic	Intergenic	63071	NR_040725	73144	Mm.482850	NR_040725		3110039I08Rik	-	RIKEN cDNA 3110039I08 gene	ncRNA
chr9_41426321_41427180	chr9	41426322	41427180	+	0.881519	NA	intron (NR_040725, intron 4 of 4)	intron (NR_040725, intron 4 of 4)	50190	NR_040725	73144	Mm.482850	NR_040725		3110039I08Rik	-	RIKEN cDNA 3110039I08 gene	ncRNA
chr4_35224029_35224511	chr4	35224030	35224511	+	1.36076	NA	intron (NM_001081343, intron 1 of 10)	MER44B|DNA|TcMar-Tigger	1610	NM_001081343	73205	Mm.331544	NM_001081343	ENSMUSG00000028300	3110043O21Rik	AI840585	RIKEN cDNA 3110043O21 gene	protein-coding
chr17_21652525_21652973	chr17	21652526	21652973	+	1.52332	NA	intron (NM_001166497, intron 2 of 5)	RLTR48B|LTR|ERV1	2138	NM_001166497	73229	Mm.296733	NM_001166497		3110052M02Rik	mszf57|mszf71	RIKEN cDNA 3110052M02 gene	protein-coding
chr17_21652010_21652375	chr17	21652011	21652375	+	0.883275	NA	intron (NM_001166497, intron 1 of 5)	intron (NM_001166497, intron 1 of 5)	1582	NM_001166497	73229	Mm.296733	NM_001166497		3110052M02Rik	mszf57|mszf71	RIKEN cDNA 3110052M02 gene	protein-coding
chr12_70995115_70995696	chr12	70995116	70995696	+	1.01801	NA	TTS (NM_011184)	TTS (NM_011184)	20417	NR_045056	73204	Mm.363770	NR_045055	ENSMUSG00000085622	3110056K07Rik	4921536K06Rik	RIKEN cDNA 3110056K07 gene	ncRNA
chr5_30126693_30127202	chr5	30126694	30127202	+	1.15584	NA	intron (NM_178878, intron 12 of 19)	intron (NM_178878, intron 12 of 19)	-20862	NM_001256263	433868	Mm.450696	NM_001256263		3110082J24Rik	ENSMUSG00000073106	RIKEN cDNA 3110082J24 gene	protein-coding
chr17_5755775_5756511	chr17	5755776	5756511	+	1.89487	NA	Intergenic	Intergenic	-42514	NR_045081	78512	Mm.23696	NR_045079	ENSMUSG00000096965	3300005D01Rik	-	RIKEN cDNA 3300005D01 gene	ncRNA
chr17_5795378_5795763	chr17	5795379	5795763	+	1.13708	NA	Intergenic	Intergenic	-3086	NR_045081	78512	Mm.23696	NR_045079	ENSMUSG00000096965	3300005D01Rik	-	RIKEN cDNA 3300005D01 gene	ncRNA
chr17_5668244_5668927	chr17	5668245	5668927	+	0.993679	NA	intron (NM_146073, intron 2 of 8)	intron (NM_146073, intron 2 of 8)	-130071	NR_045081	78512	Mm.23696	NR_045079	ENSMUSG00000096965	3300005D01Rik	-	RIKEN cDNA 3300005D01 gene	ncRNA
chr17_5747655_5748474	chr17	5747656	5748474	+	0.970643	NA	intron (NM_146073, intron 8 of 8)	(TG)n|Simple_repeat|Simple_repeat	-50592	NR_045081	78512	Mm.23696	NR_045079	ENSMUSG00000096965	3300005D01Rik	-	RIKEN cDNA 3300005D01 gene	ncRNA
chr17_5729070_5729449	chr17	5729071	5729449	+	0.636461	NA	intron (NM_146073, intron 7 of 8)	ORR1B1|LTR|ERVL-MaLR	-69397	NR_045081	78512	Mm.23696	NR_045079	ENSMUSG00000096965	3300005D01Rik	-	RIKEN cDNA 3300005D01 gene	ncRNA
chr14_32696322_32697073	chr14	32696323	32697073	+	1.18898	NA	Intergenic	Intergenic	-11426	NM_001195097	100504518	Mm.318319	NM_001195097	ENSMUSG00000071540	3425401B19Rik	-	RIKEN cDNA 3425401B19 gene	protein-coding
chr14_12243398_12244301	chr14	12243399	12244301	+	0.842678	NA	Intergenic	Intergenic	-40353	NM_001284384	218734	Mm.44068	NM_146051	ENSMUSG00000033111	3830406C13Rik	-	RIKEN cDNA 3830406C13 gene	protein-coding
chr13_107133917_107134607	chr13	107133918	107134607	+	1.63837	NA	Intergenic	Intergenic	111692	NR_015471	100040322	Mm.133867	NR_015471		3830408C21Rik	-	RIKEN cDNA 3830408C21 gene	ncRNA
chr13_107241685_107242223	chr13	107241686	107242223	+	1.56063	NA	Intergenic	Intergenic	219384	NR_015471	100040322	Mm.133867	NR_015471		3830408C21Rik	-	RIKEN cDNA 3830408C21 gene	ncRNA
chr13_107096933_107097234	chr13	107096934	107097234	+	1.11034	NA	Intergenic	Intergenic	74514	NR_015471	100040322	Mm.133867	NR_015471		3830408C21Rik	-	RIKEN cDNA 3830408C21 gene	ncRNA
chr13_107095191_107095997	chr13	107095192	107095997	+	0.636972	NA	Intergenic	Intergenic	73024	NR_015471	100040322	Mm.133867	NR_015471		3830408C21Rik	-	RIKEN cDNA 3830408C21 gene	ncRNA
chr2_92994377_92995147	chr2	92994378	92995147	+	1.0444	NA	intron (NM_001177536, intron 4 of 6)	intron (NM_001177536, intron 4 of 6)	-34586	NR_110333	433456	Mm.235231	NM_001002794		4631405J19Rik	-	RIKEN cDNA 4631405J19 gene	ncRNA
chr7_67854164_67854998	chr7	67854165	67854998	+	0.885899	NA	Intergenic	Intergenic	-51085	NR_045954	73904	Mm.70992	NR_045954	ENSMUSG00000097697	4833412C05Rik	-	RIKEN cDNA 4833412C05 gene	ncRNA
chr7_67802642_67804039	chr7	67802643	67804039	+	0.808068	NA	intron (NR_045954, intron 1 of 2)	intron (NR_045954, intron 1 of 2)	155	NR_045954	73904	Mm.70992	NR_045954	ENSMUSG00000097697	4833412C05Rik	-	RIKEN cDNA 4833412C05 gene	ncRNA
chr18_4354236_4354846	chr18	4354237	4354846	+	0.654814	NA	intron (NR_040328, intron 2 of 3)	intron (NR_040328, intron 2 of 3)	994	NR_040328	73915	Mm.482777	NR_040328		4833419F23Rik	-	RIKEN cDNA 4833419F23 gene	ncRNA
chr13_91768658_91769607	chr13	91768659	91769607	+	1.00945	NA	intron (NM_028790, intron 5 of 14)	intron (NM_028790, intron 5 of 14)	-27261	NR_028313	373852	Mm.466817	NR_015501	ENSMUSG00000074782	4833422C13Rik	-	RIKEN cDNA 4833422C13 gene	ncRNA
chr13_91750156_91750487	chr13	91750157	91750487	+	0.979131	NA	intron (NM_028790, intron 2 of 14)	intron (NM_028790, intron 2 of 14)	-8450	NR_028313	373852	Mm.466817	NR_015501	ENSMUSG00000074782	4833422C13Rik	-	RIKEN cDNA 4833422C13 gene	ncRNA
chr13_91750078_91750612	chr13	91750079	91750612	+	0.936562	NA	intron (NM_028790, intron 2 of 14)	intron (NM_028790, intron 2 of 14)	-8473	NR_028313	373852	Mm.466817	NR_015501	ENSMUSG00000074782	4833422C13Rik	-	RIKEN cDNA 4833422C13 gene	ncRNA
chr2_19551922_19552437	chr2	19551923	19552437	+	1.00511	NA	intron (NM_027600, intron 1 of 16)	intron (NM_027600, intron 1 of 16)	1730	NM_027600	70909	Mm.158488	NM_027600	ENSMUSG00000026734	4921504E06Rik	4921522E24Rik	RIKEN cDNA 4921504E06 gene	protein-coding
chr2_19579551_19579884	chr2	19579552	19579884	+	0.823749	NA	Intergenic	Intergenic	-25808	NM_027600	70909	Mm.158488	NM_027600	ENSMUSG00000026734	4921504E06Rik	4921522E24Rik	RIKEN cDNA 4921504E06 gene	protein-coding
chr2_19579447_19580140	chr2	19579448	19580140	+	0.729073	NA	Intergenic	Intergenic	-25884	NM_027600	70909	Mm.158488	NM_027600	ENSMUSG00000026734	4921504E06Rik	4921522E24Rik	RIKEN cDNA 4921504E06 gene	protein-coding
chr2_19540758_19541308	chr2	19540759	19541308	+	0.70024	NA	intron (NM_027600, intron 2 of 16)	intron (NM_027600, intron 2 of 16)	12877	NM_027600	70909	Mm.158488	NM_027600	ENSMUSG00000026734	4921504E06Rik	4921522E24Rik	RIKEN cDNA 4921504E06 gene	protein-coding
chr2_93979743_93980137	chr2	93979744	93980137	+	1.64723	NA	promoter-TSS (NR_045827)	promoter-TSS (NR_045827)	-94	NR_045827	70852	Mm.437014	NR_045827	ENSMUSG00000027196	4921507L20Rik	-	RIKEN cDNA 4921507L20 gene	ncRNA
chr2_93978805_93979343	chr2	93978806	93979343	+	1.04592	NA	promoter-TSS (NR_045827)	promoter-TSS (NR_045827)	-960	NR_045827	70852	Mm.437014	NR_045827	ENSMUSG00000027196	4921507L20Rik	-	RIKEN cDNA 4921507L20 gene	ncRNA
chr13_113466520_113467068	chr13	113466521	113467068	+	0.853155	NA	intron (NR_045501, intron 3 of 6)	intron (NR_045501, intron 3 of 6)	36050	NR_045501	70917	Mm.491036	NR_045501		4921509O07Rik	-	RIKEN cDNA 4921509O07 gene	ncRNA
chr3_79233693_79234034	chr3	79233694	79234034	+	1.06091	NA	intron (NR_045502, intron 1 of 2)	intron (NR_045502, intron 1 of 2)	20945	NR_045502	70924	Mm.444622	NR_045502		4921511C10Rik	-	RIKEN cDNA 4921511C10 gene	ncRNA
chr3_79269860_79270257	chr3	79269861	79270257	+	0.855733	NA	Intergenic	Intergenic	57140	NR_045502	70924	Mm.444622	NR_045502		4921511C10Rik	-	RIKEN cDNA 4921511C10 gene	ncRNA
chr3_79244445_79244676	chr3	79244446	79244676	+	0.622214	NA	intron (NR_045502, intron 1 of 2)	Lx8|LINE|L1	31642	NR_045502	70924	Mm.444622	NR_045502		4921511C10Rik	-	RIKEN cDNA 4921511C10 gene	ncRNA
chr12_12546340_12546715	chr12	12546341	12546715	+	1.10071	NA	Intergenic	Intergenic	-154053	NR_045829	70858	Mm.410838	NR_045829		4921511I17Rik	-	RIKEN cDNA 4921511I17 gene	ncRNA
chr12_12437432_12437849	chr12	12437433	12437849	+	0.895773	NA	Intergenic	Intergenic	-45166	NR_045829	70858	Mm.410838	NR_045829		4921511I17Rik	-	RIKEN cDNA 4921511I17 gene	ncRNA
chr12_12547387_12548252	chr12	12547388	12548252	+	0.843281	NA	Intergenic	Intergenic	-155345	NR_045829	70858	Mm.410838	NR_045829		4921511I17Rik	-	RIKEN cDNA 4921511I17 gene	ncRNA
chr12_12590812_12591295	chr12	12590813	12591295	+	0.814113	NA	Intergenic	Intergenic	-198579	NR_045829	70858	Mm.410838	NR_045829		4921511I17Rik	-	RIKEN cDNA 4921511I17 gene	ncRNA
chr12_12437169_12437881	chr12	12437170	12437881	+	0.755503	NA	Intergenic	Intergenic	-45050	NR_045829	70858	Mm.410838	NR_045829		4921511I17Rik	-	RIKEN cDNA 4921511I17 gene	ncRNA
chr12_12617631_12618095	chr12	12617632	12618095	+	0.70952	NA	Intergenic	MTD|LTR|ERVL-MaLR	-225388	NR_045829	70858	Mm.410838	NR_045829		4921511I17Rik	-	RIKEN cDNA 4921511I17 gene	ncRNA
chr8_85408127_85408653	chr8	85408128	85408653	+	0.853056	NA	TTS (NM_025722)	TTS (NM_025722)	24451	NR_033144	66714	Mm.272748	NM_025722	ENSMUSG00000036934	4921524J17Rik	-	RIKEN cDNA 4921524J17 gene	protein-coding
chr13_52167876_52168404	chr13	52167877	52168404	+	0.970005	NA	Intergenic	Intergenic	71399	NR_045061	74050	Mm.84860	NR_045061		4921525O09Rik	-	RIKEN cDNA 4921525O09 gene	ncRNA
chr13_52188499_52188901	chr13	52188500	52188901	+	0.813808	NA	Intergenic	MLT1A1|LTR|ERVL-MaLR	91959	NR_045061	74050	Mm.84860	NR_045061		4921525O09Rik	-	RIKEN cDNA 4921525O09 gene	ncRNA
chr13_52188305_52188901	chr13	52188306	52188901	+	0.686131	NA	Intergenic	Intergenic	91862	NR_045061	74050	Mm.84860	NR_045061		4921525O09Rik	-	RIKEN cDNA 4921525O09 gene	ncRNA
chr18_83465021_83465575	chr18	83465022	83465575	+	0.667645	NA	Intergenic	MT2A|LTR|ERVL	-139414	NR_045361	70960	Mm.410834	NR_045361		4921531P14Rik	1700108N05Rik	RIKEN cDNA 4921531P14 gene	ncRNA
chr6_129312493_129313048	chr6	129312494	129313048	+	1.71293	NA	Intergenic	L1M4|LINE|L1	19010	NM_199034	381816	Mm.46114	NM_199034	ENSMUSG00000047720	4922502D21Rik	Clec2m|Gm1074	RIKEN cDNA 4922502D21 gene	protein-coding
chr6_129313974_129314351	chr6	129313975	129314351	+	1.19526	NA	Intergenic	Intergenic	17618	NM_199034	381816	Mm.46114	NM_199034	ENSMUSG00000047720	4922502D21Rik	Clec2m|Gm1074	RIKEN cDNA 4922502D21 gene	protein-coding
chr6_129329323_129329733	chr6	129329324	129329733	+	0.820796	NA	intron (NM_199034, intron 2 of 4)	Lx8|LINE|L1	2253	NM_199034	381816	Mm.46114	NM_199034	ENSMUSG00000047720	4922502D21Rik	Clec2m|Gm1074	RIKEN cDNA 4922502D21 gene	protein-coding
chr6_129314768_129314971	chr6	129314769	129314971	+	0.793324	NA	Intergenic	Intergenic	16911	NM_199034	381816	Mm.46114	NM_199034	ENSMUSG00000047720	4922502D21Rik	Clec2m|Gm1074	RIKEN cDNA 4922502D21 gene	protein-coding
chr6_129316401_129316801	chr6	129316402	129316801	+	0.644251	NA	Intergenic	B1F|SINE|Alu	15180	NM_199034	381816	Mm.46114	NM_199034	ENSMUSG00000047720	4922502D21Rik	Clec2m|Gm1074	RIKEN cDNA 4922502D21 gene	protein-coding
chr13_101465422_101465875	chr13	101465423	101465875	+	0.835527	NA	Intergenic	Intergenic	-68069	NR_046187	78136	Mm.399065	NR_046187		4922502H24Rik	-	RIKEN cDNA 4922502H24 gene	ncRNA
chr13_101465466_101465781	chr13	101465467	101465781	+	0.800765	NA	Intergenic	Intergenic	-68044	NR_046187	78136	Mm.399065	NR_046187		4922502H24Rik	-	RIKEN cDNA 4922502H24 gene	ncRNA
chr2_35416029_35417044	chr2	35416030	35417044	+	0.97979	NA	intron (NM_010283, intron 4 of 8)	intron (NM_010283, intron 4 of 8)	-19363	NM_001272040	74854	Mm.159338	NM_001080709	ENSMUSG00000079421	4930402F06Rik	-	RIKEN cDNA 4930402F06 gene	protein-coding
chr2_35411535_35412832	chr2	35411536	35412832	+	0.878251	NA	intron (NM_010283, intron 7 of 8)	intron (NM_010283, intron 7 of 8)	-15010	NM_001272040	74854	Mm.159338	NM_001080709	ENSMUSG00000079421	4930402F06Rik	-	RIKEN cDNA 4930402F06 gene	protein-coding
chr2_35412258_35412805	chr2	35412259	35412805	+	0.869266	NA	intron (NM_010283, intron 7 of 8)	B4|SINE|B4	-15358	NM_001272040	74854	Mm.159338	NM_001080709	ENSMUSG00000079421	4930402F06Rik	-	RIKEN cDNA 4930402F06 gene	protein-coding
chr2_35411581_35412202	chr2	35411582	35412202	+	0.817069	NA	intron (NM_010283, intron 7 of 8)	intron (NM_010283, intron 7 of 8)	-14718	NM_001272040	74854	Mm.159338	NM_001080709	ENSMUSG00000079421	4930402F06Rik	-	RIKEN cDNA 4930402F06 gene	protein-coding
chr2_130835559_130836008	chr2	130835560	130836008	+	0.911434	NA	intron (NM_029432, intron 1 of 36)	PB1D11|SINE|Alu	4326	NM_029432	228602	Mm.271990	NM_029432	ENSMUSG00000027309	4930402H24Rik	2810487F15Rik|AI413763|C78926	RIKEN cDNA 4930402H24 gene	protein-coding
chrX_9139580_9140026	chrX	9139581	9140026	+	1.00335	NA	Intergenic	Intergenic	35241	NM_001270700	75775	Mm.50374	NM_001270700	ENSMUSG00000045797	4930402K13Rik	-	RIKEN cDNA 4930402K13 gene	protein-coding
chrX_9139401_9139959	chrX	9139402	9139959	+	0.806289	NA	Intergenic	Intergenic	35118	NM_001270700	75775	Mm.50374	NM_001270700	ENSMUSG00000045797	4930402K13Rik	-	RIKEN cDNA 4930402K13 gene	protein-coding
chrX_9139025_9140019	chrX	9139026	9140019	+	0.685852	NA	Intergenic	Lx4A|LINE|L1	34960	NM_001270700	75775	Mm.50374	NM_001270700	ENSMUSG00000045797	4930402K13Rik	-	RIKEN cDNA 4930402K13 gene	protein-coding
chr16_52879494_52880004	chr16	52879495	52880004	+	0.671887	NA	Intergenic	Intergenic	-64005	NR_040495	73820	Mm.60493	NR_040495		4930404A05Rik	-	RIKEN cDNA 4930404A05 gene	ncRNA
chr2_156682876_156683391	chr2	156682877	156683391	+	0.832401	NA	intron (NM_146128, intron 2 of 12)	intron (NM_146128, intron 2 of 12)	37775	NR_040505	74846	Mm.443946	NR_040505	ENSMUSG00000086638	4930405A21Rik	-	RIKEN cDNA 4930405A21 gene	ncRNA
chr3_100443615_100444482	chr3	100443616	100444482	+	1.7725	NA	Intergenic	Intergenic	17644	NR_040543	73806	Mm.396549	NR_040543	ENSMUSG00000086923	4930406D18Rik	-	RIKEN cDNA 4930406D18 gene	ncRNA
chr3_100442517_100443268	chr3	100442518	100443268	+	0.926103	NA	Intergenic	Intergenic	16488	NR_040543	73806	Mm.396549	NR_040543	ENSMUSG00000086923	4930406D18Rik	-	RIKEN cDNA 4930406D18 gene	ncRNA
chr3_100436596_100437293	chr3	100436597	100437293	+	0.895305	NA	intron (NR_040543, intron 2 of 2)	intron (NR_040543, intron 2 of 2)	10540	NR_040543	73806	Mm.396549	NR_040543	ENSMUSG00000086923	4930406D18Rik	-	RIKEN cDNA 4930406D18 gene	ncRNA
chr3_100438476_100438733	chr3	100438477	100438733	+	0.650189	NA	TTS (NR_040543)	TTS (NR_040543)	12200	NR_040543	73806	Mm.396549	NR_040543	ENSMUSG00000086923	4930406D18Rik	-	RIKEN cDNA 4930406D18 gene	ncRNA
chr7_122844858_122845219	chr7	122844859	122845219	+	0.80852	NA	Intergenic	Intergenic	125420	NR_045614	73951	Mm.389936	NR_045614		4930413G21Rik	-	RIKEN cDNA 4930413G21 gene	ncRNA
chr7_122924158_122924608	chr7	122924159	122924608	+	0.704041	NA	Intergenic	MLT1B|LTR|ERVL-MaLR	46076	NR_045614	73951	Mm.389936	NR_045614		4930413G21Rik	-	RIKEN cDNA 4930413G21 gene	ncRNA
chr7_122924003_122924630	chr7	122924004	122924630	+	0.663207	NA	Intergenic	MLT1B|LTR|ERVL-MaLR	46142	NR_045614	73951	Mm.389936	NR_045614		4930413G21Rik	-	RIKEN cDNA 4930413G21 gene	ncRNA
chr11_11545898_11546240	chr11	11545899	11546240	+	1.04369	NA	Intergenic	Intergenic	56803	NM_028669	73862	Mm.159077	NM_028669	ENSMUSG00000020191	4930415F15Rik	-	RIKEN cDNA 4930415F15 gene	protein-coding
chr11_11545765_11546248	chr11	11545766	11546248	+	1.03306	NA	Intergenic	Intergenic	56741	NM_028669	73862	Mm.159077	NM_028669	ENSMUSG00000020191	4930415F15Rik	-	RIKEN cDNA 4930415F15 gene	protein-coding
chr11_11566416_11566769	chr11	11566417	11566769	+	0.916604	NA	Intergenic	MTC|LTR|ERVL-MaLR	77327	NM_028669	73862	Mm.159077	NM_028669	ENSMUSG00000020191	4930415F15Rik	-	RIKEN cDNA 4930415F15 gene	protein-coding
chr11_11519342_11519713	chr11	11519343	11519713	+	0.828127	NA	Intergenic	Intergenic	30262	NM_028669	73862	Mm.159077	NM_028669	ENSMUSG00000020191	4930415F15Rik	-	RIKEN cDNA 4930415F15 gene	protein-coding
chr11_11519303_11519923	chr11	11519304	11519923	+	0.777479	NA	Intergenic	Intergenic	30347	NM_028669	73862	Mm.159077	NM_028669	ENSMUSG00000020191	4930415F15Rik	-	RIKEN cDNA 4930415F15 gene	protein-coding
chr11_11587311_11587819	chr11	11587312	11587819	+	0.710859	NA	Intergenic	Intergenic	98299	NM_028669	73862	Mm.159077	NM_028669	ENSMUSG00000020191	4930415F15Rik	-	RIKEN cDNA 4930415F15 gene	protein-coding
chr11_11546861_11547262	chr11	11546862	11547262	+	0.707521	NA	Intergenic	Intergenic	57796	NM_028669	73862	Mm.159077	NM_028669	ENSMUSG00000020191	4930415F15Rik	-	RIKEN cDNA 4930415F15 gene	protein-coding
chr11_11517850_11518080	chr11	11517851	11518080	+	0.6527	NA	Intergenic	Lx9|LINE|L1	28699	NM_028669	73862	Mm.159077	NM_028669	ENSMUSG00000020191	4930415F15Rik	-	RIKEN cDNA 4930415F15 gene	protein-coding
chr6_125256281_125256563	chr6	125256282	125256563	+	0.772195	NA	Intergenic	Intergenic	-9103	NR_015527	73870	Mm.440681	NR_015527		4930417O13Rik	-	RIKEN cDNA 4930417O13 gene	ncRNA
chr5_107677201_107677839	chr5	107677202	107677839	+	1.48705	NA	Intergenic	Intergenic	25960	NR_045871	654809	Mm.399159	NR_045871		4930428O21Rik	-	RIKEN cDNA 4930428O21 gene	ncRNA
chr5_107678399_107678831	chr5	107678400	107678831	+	1.40201	NA	Intergenic	Intergenic	24865	NR_045871	654809	Mm.399159	NR_045871		4930428O21Rik	-	RIKEN cDNA 4930428O21 gene	ncRNA
chr5_107677191_107678236	chr5	107677192	107678236	+	1.40025	NA	Intergenic	B1F|SINE|Alu	25766	NR_045871	654809	Mm.399159	NR_045871		4930428O21Rik	-	RIKEN cDNA 4930428O21 gene	ncRNA
chr5_107694272_107694702	chr5	107694273	107694702	+	0.794611	NA	Intergenic	Intergenic	8993	NR_045871	654809	Mm.399159	NR_045871		4930428O21Rik	-	RIKEN cDNA 4930428O21 gene	ncRNA
chr17_79455182_79455641	chr17	79455183	79455641	+	0.646396	NA	Intergenic	Intergenic	22473	NR_033463	74622	Mm.311921	NR_033463		4930429F11Rik	-	RIKEN cDNA 4930429F11 gene	ncRNA
chr9_79802230_79802675	chr9	79802231	79802675	+	1.06993	NA	non-coding (NR_040734, exon 3 of 3)	non-coding (NR_040734, exon 3 of 3)	8812	NR_040734	74633	Mm.262175	NR_040734	ENSMUSG00000086918	4930429F24Rik	-	RIKEN cDNA 4930429F24 gene	ncRNA
chr9_79806370_79806701	chr9	79806371	79806701	+	0.663449	NA	Intergenic	Intergenic	12895	NR_040734	74633	Mm.262175	NR_040734	ENSMUSG00000086918	4930429F24Rik	-	RIKEN cDNA 4930429F24 gene	ncRNA
chr10_100542755_100543387	chr10	100542756	100543387	+	0.642384	NA	intron (NM_146009, intron 35 of 52)	intron (NM_146009, intron 35 of 52)	46188	NM_175128	68281	Mm.268474	NM_175128	ENSMUSG00000046567	4930430F08Rik	4930571E09Rik|A730088G13Rik|AW551239|C430008C19Rik	RIKEN cDNA 4930430F08 gene	protein-coding
chr15_31125849_31126373	chr15	31125850	31126373	+	0.864524	NA	Intergenic	Intergenic	86985	NR_045186	73784	Mm.66947	NR_045186		4930430F21Rik	-	RIKEN cDNA 4930430F21 gene	ncRNA
chr3_121686605_121687167	chr3	121686606	121687167	+	0.930466	NA	Intergenic	Intergenic	16123	NM_001033814	619318	Mm.371258	NM_001033814		4930432M17Rik	-	RIKEN cDNA 4930432M17 gene	protein-coding
chr1_94827581_94828109	chr1	94827582	94828109	+	1.20351	NA	Intergenic	RLTR14|LTR|ERV1	30403	NR_040473	74689	Mm.399187	NR_040473		4930440C22Rik	-	RIKEN cDNA 4930440C22 gene	ncRNA
chr1_94456502_94456838	chr1	94456503	94456838	+	1.14666	NA	Intergenic	ORR1B1|LTR|ERVL-MaLR	-340772	NR_040473	74689	Mm.399187	NR_040473		4930440C22Rik	-	RIKEN cDNA 4930440C22 gene	ncRNA
chr1_94464736_94465238	chr1	94464737	94465238	+	0.794923	NA	Intergenic	Intergenic	-332455	NR_040473	74689	Mm.399187	NR_040473		4930440C22Rik	-	RIKEN cDNA 4930440C22 gene	ncRNA
chr2_78049218_78049762	chr2	78049219	78049762	+	0.829419	NA	Intergenic	Intergenic	-1687	NR_108098	78158	Mm.78473	NR_108098	ENSMUSG00000085431	4930440I19Rik	-	RIKEN cDNA 4930440I19 gene	ncRNA
chr2_78049145_78049882	chr2	78049146	78049882	+	0.704864	NA	Intergenic	Intergenic	-1663	NR_108098	78158	Mm.78473	NR_108098	ENSMUSG00000085431	4930440I19Rik	-	RIKEN cDNA 4930440I19 gene	ncRNA
chr16_64739451_64739872	chr16	64739452	64739872	+	0.717963	NA	Intergenic	Intergenic	31277	NM_026273	67609	Mm.212157	NM_026273	ENSMUSG00000059920	4930453N24Rik	AI649104	RIKEN cDNA 4930453N24 gene	protein-coding
chr16_64739480_64739763	chr16	64739481	64739763	+	0.677158	NA	Intergenic	MER5A|DNA|hAT-Charlie	31317	NM_026273	67609	Mm.212157	NM_026273	ENSMUSG00000059920	4930453N24Rik	AI649104	RIKEN cDNA 4930453N24 gene	protein-coding
chr10_21319446_21319960	chr10	21319447	21319960	+	1.16301	NA	intron (NR_045352, intron 3 of 3)	B1F2|SINE|Alu	22352	NR_045352	73990	Mm.399240	NR_045352		4930455C13Rik	-	RIKEN cDNA 4930455C13 gene	ncRNA
chr10_21358028_21358538	chr10	21358029	21358538	+	1.07204	NA	intron (NM_019702, intron 13 of 17)	intron (NM_019702, intron 13 of 17)	-16228	NR_045352	73990	Mm.399240	NR_045352		4930455C13Rik	-	RIKEN cDNA 4930455C13 gene	ncRNA
chr10_21336667_21336936	chr10	21336668	21336936	+	0.849082	NA	intron (NR_045352, intron 1 of 3)	intron (NR_045352, intron 1 of 3)	5253	NR_045352	73990	Mm.399240	NR_045352		4930455C13Rik	-	RIKEN cDNA 4930455C13 gene	ncRNA
chr10_96237649_96238074	chr10	96237650	96238074	+	1.60975	NA	intron (NR_110448, intron 1 of 2)	intron (NR_110448, intron 1 of 2)	11655	NR_110448	74881	Mm.410819	NR_110448		4930459C07Rik	-	RIKEN cDNA 4930459C07 gene	ncRNA
chr10_96231132_96231791	chr10	96231133	96231791	+	1.40758	NA	intron (NR_110448, intron 1 of 2)	intron (NR_110448, intron 1 of 2)	5255	NR_110448	74881	Mm.410819	NR_110448		4930459C07Rik	-	RIKEN cDNA 4930459C07 gene	ncRNA
chr10_96337804_96338983	chr10	96337805	96338983	+	1.28477	NA	Intergenic	Intergenic	112187	NR_110448	74881	Mm.410819	NR_110448		4930459C07Rik	-	RIKEN cDNA 4930459C07 gene	ncRNA
chr10_96342388_96342838	chr10	96342389	96342838	+	1.23008	NA	Intergenic	Intergenic	116406	NR_110448	74881	Mm.410819	NR_110448		4930459C07Rik	-	RIKEN cDNA 4930459C07 gene	ncRNA
chr10_96238822_96239280	chr10	96238823	96239280	+	1.04471	NA	intron (NR_110448, intron 1 of 2)	intron (NR_110448, intron 1 of 2)	12844	NR_110448	74881	Mm.410819	NR_110448		4930459C07Rik	-	RIKEN cDNA 4930459C07 gene	ncRNA
chr10_96104240_96105465	chr10	96104241	96105465	+	0.903455	NA	Intergenic	Intergenic	-121354	NR_110448	74881	Mm.410819	NR_110448		4930459C07Rik	-	RIKEN cDNA 4930459C07 gene	ncRNA
chr10_96104242_96105122	chr10	96104243	96105122	+	0.878612	NA	Intergenic	MTD|LTR|ERVL-MaLR	-121525	NR_110448	74881	Mm.410819	NR_110448		4930459C07Rik	-	RIKEN cDNA 4930459C07 gene	ncRNA
chr10_96262923_96263249	chr10	96262924	96263249	+	0.800013	NA	Intergenic	Intergenic	36879	NR_110448	74881	Mm.410819	NR_110448		4930459C07Rik	-	RIKEN cDNA 4930459C07 gene	ncRNA
chr10_96237095_96237341	chr10	96237096	96237341	+	0.720536	NA	intron (NR_110448, intron 1 of 2)	intron (NR_110448, intron 1 of 2)	11011	NR_110448	74881	Mm.410819	NR_110448		4930459C07Rik	-	RIKEN cDNA 4930459C07 gene	ncRNA
chr10_96236125_96236326	chr10	96236126	96236326	+	0.706981	NA	intron (NR_110448, intron 1 of 2)	RMER17C|LTR|ERVK	10019	NR_110448	74881	Mm.410819	NR_110448		4930459C07Rik	-	RIKEN cDNA 4930459C07 gene	ncRNA
chr10_96263659_96264628	chr10	96263660	96264628	+	0.701169	NA	Intergenic	(TCTCTG)n|Simple_repeat|Simple_repeat	37937	NR_110448	74881	Mm.410819	NR_110448		4930459C07Rik	-	RIKEN cDNA 4930459C07 gene	ncRNA
chr10_96263782_96264320	chr10	96263783	96264320	+	0.628285	NA	Intergenic	Intergenic	37844	NR_110448	74881	Mm.410819	NR_110448		4930459C07Rik	-	RIKEN cDNA 4930459C07 gene	ncRNA
chr5_58599876_58600249	chr5	58599877	58600249	+	0.904419	NA	Intergenic	Lx7|LINE|L1	-147065	NR_046190	78163	Mm.243828	NR_046190		4930459L07Rik	-	RIKEN cDNA 4930459L07 gene	ncRNA
chr12_107641573_107642083	chr12	107641574	107642083	+	1.27065	NA	Intergenic	Intergenic	93660	NR_045973	74968	Mm.359821	NR_045973	ENSMUSG00000085641	4930465M20Rik	4930431H15Rik	RIKEN cDNA 4930465M20 gene	ncRNA
chr12_107540564_107541025	chr12	107540565	107541025	+	0.808503	NA	Intergenic	ORR1F|LTR|ERVL-MaLR	194693	NR_045973	74968	Mm.359821	NR_045973	ENSMUSG00000085641	4930465M20Rik	4930431H15Rik	RIKEN cDNA 4930465M20 gene	ncRNA
chr12_107640471_107640988	chr12	107640472	107640988	+	0.757122	NA	Intergenic	MTD|LTR|ERVL-MaLR	94758	NR_045973	74968	Mm.359821	NR_045973	ENSMUSG00000085641	4930465M20Rik	4930431H15Rik	RIKEN cDNA 4930465M20 gene	ncRNA
chr14_36317270_36317643	chr14	36317271	36317643	+	0.941938	NA	Intergenic	Intergenic	222492	NM_175008	218921	Mm.212464	NM_175008	ENSMUSG00000096405	4930474N05Rik	-	RIKEN cDNA 4930474N05 gene	protein-coding
chr12_99183309_99183799	chr12	99183310	99183799	+	0.671244	NA	Intergenic	Intergenic	-20746	NR_038130	67639	Mm.87374	NR_038130		4930474N09Rik	-	RIKEN cDNA 4930474N09 gene	ncRNA
chr16_78502479_78503434	chr16	78502480	78503434	+	1.00101	NA	Intergenic	Intergenic	-57359	NR_040569	75818	Mm.410817	NR_040569		4930478L05Rik	-	RIKEN cDNA 4930478L05 gene	ncRNA
chr16_78518658_78519125	chr16	78518659	78519125	+	0.820772	NA	Intergenic	Intergenic	-41424	NR_040569	75818	Mm.410817	NR_040569		4930478L05Rik	-	RIKEN cDNA 4930478L05 gene	ncRNA
chr16_78547416_78547649	chr16	78547417	78547649	+	0.72158	NA	intron (NM_001252438, intron 3 of 4)	intron (NM_001252438, intron 3 of 4)	-12783	NR_040569	75818	Mm.410817	NR_040569		4930478L05Rik	-	RIKEN cDNA 4930478L05 gene	ncRNA
chr16_78547433_78547737	chr16	78547434	78547737	+	0.700009	NA	exon (NM_025967, exon 3 of 5)	exon (NM_025967, exon 3 of 5)	-12731	NR_040569	75818	Mm.410817	NR_040569		4930478L05Rik	-	RIKEN cDNA 4930478L05 gene	ncRNA
chr16_78547374_78547817	chr16	78547375	78547817	+	0.692171	NA	exon (NM_025967, exon 3 of 5)	exon (NM_025967, exon 3 of 5)	-12720	NR_040569	75818	Mm.410817	NR_040569		4930478L05Rik	-	RIKEN cDNA 4930478L05 gene	ncRNA
chr6_146674399_146675614	chr6	146674400	146675614	+	1.3587	NA	Intergenic	Intergenic	17789	NR_046277	74925	Mm.386304	NR_046277	ENSMUSG00000085238	4930479D17Rik	-	RIKEN cDNA 4930479D17 gene	ncRNA
chr17_90797588_90798132	chr17	90797589	90798132	+	0.84165	NA	intron (NM_020252, intron 4 of 22)	intron (NM_020252, intron 4 of 22)	-63309	NR_045463	78800	Mm.410772	NR_045463	ENSMUSG00000090160	4930480K15Rik	-	RIKEN cDNA 4930480K15 gene	ncRNA
chr12_26059070_26059533	chr12	26059071	26059533	+	1.69501	NA	Intergenic	Intergenic	-151965	NR_046278	74930	Mm.398932	NR_046278		4930480M12Rik	-	RIKEN cDNA 4930480M12 gene	ncRNA
chr12_25989474_25990105	chr12	25989475	25990105	+	1.58158	NA	Intergenic	Intergenic	-221477	NR_046278	74930	Mm.398932	NR_046278		4930480M12Rik	-	RIKEN cDNA 4930480M12 gene	ncRNA
chr12_26062369_26062834	chr12	26062370	26062834	+	1.07448	NA	Intergenic	Intergenic	-148665	NR_046278	74930	Mm.398932	NR_046278		4930480M12Rik	-	RIKEN cDNA 4930480M12 gene	ncRNA
chr12_26087678_26088109	chr12	26087679	26088109	+	0.953484	NA	Intergenic	Intergenic	-123373	NR_046278	74930	Mm.398932	NR_046278		4930480M12Rik	-	RIKEN cDNA 4930480M12 gene	ncRNA
chr12_26206748_26207185	chr12	26206749	26207185	+	0.773701	NA	Intergenic	L2|LINE|L2	-4300	NR_046278	74930	Mm.398932	NR_046278		4930480M12Rik	-	RIKEN cDNA 4930480M12 gene	ncRNA
chr12_26087497_26088081	chr12	26087498	26088081	+	0.660504	NA	Intergenic	Intergenic	-123478	NR_046278	74930	Mm.398932	NR_046278		4930480M12Rik	-	RIKEN cDNA 4930480M12 gene	ncRNA
chr3_153189995_153190592	chr3	153189996	153190592	+	0.775072	NA	Intergenic	ORR1D2|LTR|ERVL-MaLR	-38186	NR_108044	75001		NR_108044		4930482G09Rik	-	RIKEN cDNA 4930482G09 gene	ncRNA
chr3_153190048_153190420	chr3	153190049	153190420	+	0.747909	NA	Intergenic	ORR1D2|LTR|ERVL-MaLR	-38126	NR_108044	75001		NR_108044		4930482G09Rik	-	RIKEN cDNA 4930482G09 gene	ncRNA
chr2_104561386_104561875	chr2	104561387	104561875	+	1.67769	NA	intron (NR_040322, intron 2 of 3)	MTEa|LTR|ERVL-MaLR	2172	NR_040323	74959	Mm.417819	NR_040322	ENSMUSG00000086454	4930500J02Rik	-	RIKEN cDNA 4930500J02 gene	ncRNA
chr2_104562112_104562471	chr2	104562113	104562471	+	1.34358	NA	intron (NR_040322, intron 2 of 3)	intron (NR_040322, intron 2 of 3)	2833	NR_040323	74959	Mm.417819	NR_040322	ENSMUSG00000086454	4930500J02Rik	-	RIKEN cDNA 4930500J02 gene	ncRNA
chr2_104560164_104560558	chr2	104560165	104560558	+	1.0676	NA	intron (NR_040322, intron 2 of 3)	intron (NR_040322, intron 2 of 3)	902	NR_040323	74959	Mm.417819	NR_040322	ENSMUSG00000086454	4930500J02Rik	-	RIKEN cDNA 4930500J02 gene	ncRNA
chr5_139506065_139506588	chr5	139506066	139506588	+	0.980047	NA	Intergenic	ZP3AR|Satellite|Satellite	-17424	NR_040701	74973	Mm.141282	NR_040701		4930500L23Rik	-	RIKEN cDNA 4930500L23 gene	ncRNA
chr3_146705133_146705830	chr3	146705134	146705830	+	0.930382	NA	Intergenic	MER67B|LTR|ERV1	-54165	NM_029144	75015	Mm.250432	NM_029144		4930503B20Rik	1700013A07Rik|1700095G21Rik|4930483N21Rik	RIKEN cDNA 4930503B20 gene	protein-coding
chr10_124138446_124138861	chr10	124138447	124138861	+	1.16167	NA	Intergenic	Intergenic	-330420	NR_028310	75030	Mm.159403	NR_028310		4930503E24Rik	-	eukaryotic translation initiation factor 3, subunit I pseudogene	pseudo
chr9_72520415_72521227	chr9	72520416	72521227	+	1.36528	NA	intron (NR_045735, intron 2 of 2)	intron (NR_045735, intron 2 of 2)	11037	NR_045735	75115	Mm.280755	NR_045735	ENSMUSG00000096986	4930509E16Rik	-	RIKEN cDNA 4930509E16 gene	ncRNA
chr9_72520698_72521211	chr9	72520699	72521211	+	1.32976	NA	intron (NR_045735, intron 2 of 2)	intron (NR_045735, intron 2 of 2)	10903	NR_045735	75115	Mm.280755	NR_045735	ENSMUSG00000096986	4930509E16Rik	-	RIKEN cDNA 4930509E16 gene	ncRNA
chr6_94929009_94929409	chr6	94929010	94929409	+	1.03195	NA	Intergenic	Intergenic	-14625	NR_040761	78773	Mm.67065	NR_040761		4930511E03Rik	-	RIKEN cDNA 4930511E03 gene	ncRNA
chr6_94915851_94916997	chr6	94915852	94916997	+	0.950633	NA	Intergenic	Intergenic	-27410	NR_040761	78773	Mm.67065	NR_040761		4930511E03Rik	-	RIKEN cDNA 4930511E03 gene	ncRNA
chr6_94935128_94935459	chr6	94935129	94935459	+	0.743842	NA	Intergenic	Intergenic	-8540	NR_040761	78773	Mm.67065	NR_040761		4930511E03Rik	-	RIKEN cDNA 4930511E03 gene	ncRNA
chr6_94935127_94936012	chr6	94935128	94936012	+	0.630224	NA	Intergenic	MER113|DNA|hAT-Charlie	-8264	NR_040761	78773	Mm.67065	NR_040761		4930511E03Rik	-	RIKEN cDNA 4930511E03 gene	ncRNA
chr5_39338794_39339117	chr5	39338795	39339117	+	1.26493	NA	Intergenic	Intergenic	264618	NR_045416	75095	Mm.332354	NR_045416		4930513D17Rik	-	RIKEN cDNA 4930513D17 gene	ncRNA
chr5_39337971_39338430	chr5	39337972	39338430	+	1.16543	NA	Intergenic	Intergenic	265373	NR_045416	75095	Mm.332354	NR_045416		4930513D17Rik	-	RIKEN cDNA 4930513D17 gene	ncRNA
chr5_39335410_39335845	chr5	39335411	39335845	+	0.902963	NA	Intergenic	Lx|LINE|L1	267946	NR_045416	75095	Mm.332354	NR_045416		4930513D17Rik	-	RIKEN cDNA 4930513D17 gene	ncRNA
chr5_39395208_39395842	chr5	39395209	39395842	+	0.883307	NA	Intergenic	Intergenic	208049	NR_045416	75095	Mm.332354	NR_045416		4930513D17Rik	-	RIKEN cDNA 4930513D17 gene	ncRNA
chr13_30619725_30620074	chr13	30619726	30620074	+	1.56757	NA	intron (NR_045975, intron 2 of 3)	intron (NR_045975, intron 2 of 3)	4857	NR_045975	75090	Mm.292232	NR_045975	ENSMUSG00000086263	4930519D14Rik	-	RIKEN cDNA 4930519D14 gene	ncRNA
chr13_30613968_30614525	chr13	30613969	30614525	+	1.34917	NA	promoter-TSS (NR_045975)	promoter-TSS (NR_045975)	-796	NR_045975	75090	Mm.292232	NR_045975	ENSMUSG00000086263	4930519D14Rik	-	RIKEN cDNA 4930519D14 gene	ncRNA
chr13_30585792_30586448	chr13	30585793	30586448	+	1.25006	NA	Intergenic	Intergenic	-28923	NR_045975	75090	Mm.292232	NR_045975	ENSMUSG00000086263	4930519D14Rik	-	RIKEN cDNA 4930519D14 gene	ncRNA
chr13_30628317_30628871	chr13	30628318	30628871	+	1.16638	NA	Intergenic	Intergenic	13551	NR_045975	75090	Mm.292232	NR_045975	ENSMUSG00000086263	4930519D14Rik	-	RIKEN cDNA 4930519D14 gene	ncRNA
chr13_30609784_30610144	chr13	30609785	30610144	+	1.05559	NA	Intergenic	Intergenic	-5079	NR_045975	75090	Mm.292232	NR_045975	ENSMUSG00000086263	4930519D14Rik	-	RIKEN cDNA 4930519D14 gene	ncRNA
chr13_30603868_30604314	chr13	30603869	30604314	+	1.0258	NA	Intergenic	Intergenic	-10952	NR_045975	75090	Mm.292232	NR_045975	ENSMUSG00000086263	4930519D14Rik	-	RIKEN cDNA 4930519D14 gene	ncRNA
chr13_30607269_30607738	chr13	30607270	30607738	+	1.02549	NA	Intergenic	Intergenic	-7539	NR_045975	75090	Mm.292232	NR_045975	ENSMUSG00000086263	4930519D14Rik	-	RIKEN cDNA 4930519D14 gene	ncRNA
chr13_30627008_30627391	chr13	30627009	30627391	+	0.860617	NA	Intergenic	Intergenic	12157	NR_045975	75090	Mm.292232	NR_045975	ENSMUSG00000086263	4930519D14Rik	-	RIKEN cDNA 4930519D14 gene	ncRNA
chr13_30600723_30601359	chr13	30600724	30601359	+	0.857139	NA	Intergenic	Intergenic	-14002	NR_045975	75090	Mm.292232	NR_045975	ENSMUSG00000086263	4930519D14Rik	-	RIKEN cDNA 4930519D14 gene	ncRNA
chr13_30634025_30634269	chr13	30634026	30634269	+	0.845284	NA	Intergenic	B1F|SINE|Alu	19104	NR_045975	75090	Mm.292232	NR_045975	ENSMUSG00000086263	4930519D14Rik	-	RIKEN cDNA 4930519D14 gene	ncRNA
chr13_30619316_30619654	chr13	30619317	30619654	+	0.819294	NA	intron (NR_045975, intron 2 of 3)	intron (NR_045975, intron 2 of 3)	4442	NR_045975	75090	Mm.292232	NR_045975	ENSMUSG00000086263	4930519D14Rik	-	RIKEN cDNA 4930519D14 gene	ncRNA
chr13_30614704_30614992	chr13	30614705	30614992	+	0.699774	NA	promoter-TSS (NR_045975)	promoter-TSS (NR_045975)	-195	NR_045975	75090	Mm.292232	NR_045975	ENSMUSG00000086263	4930519D14Rik	-	RIKEN cDNA 4930519D14 gene	ncRNA
chr13_30601579_30602162	chr13	30601580	30602162	+	0.689881	NA	Intergenic	MTD|LTR|ERVL-MaLR	-13172	NR_045975	75090	Mm.292232	NR_045975	ENSMUSG00000086263	4930519D14Rik	-	RIKEN cDNA 4930519D14 gene	ncRNA
chr13_30601081_30601363	chr13	30601082	30601363	+	0.673377	NA	Intergenic	Intergenic	-13821	NR_045975	75090	Mm.292232	NR_045975	ENSMUSG00000086263	4930519D14Rik	-	RIKEN cDNA 4930519D14 gene	ncRNA
chr10_28807310_28808025	chr10	28807311	28808025	+	1.1643	NA	intron (NM_178666, intron 4 of 5)	intron (NM_178666, intron 4 of 5)	115839	NR_033601	114676	Mm.390292	NR_033601		4930519F09Rik	-	pyruvate dehydrogenase E1 alpha 1 pseudogene	pseudo
chr10_28860157_28860508	chr10	28860158	28860508	+	1.00807	NA	intron (NM_178666, intron 4 of 5)	intron (NM_178666, intron 4 of 5)	63174	NR_033601	114676	Mm.390292	NR_033601		4930519F09Rik	-	pyruvate dehydrogenase E1 alpha 1 pseudogene	pseudo
chr10_28816095_28816584	chr10	28816096	28816584	+	0.853203	NA	intron (NM_178666, intron 4 of 5)	ORR1B1|LTR|ERVL-MaLR	107167	NR_033601	114676	Mm.390292	NR_033601		4930519F09Rik	-	pyruvate dehydrogenase E1 alpha 1 pseudogene	pseudo
chr10_28816253_28816521	chr10	28816254	28816521	+	0.833455	NA	intron (NM_178666, intron 4 of 5)	ORR1B1|LTR|ERVL-MaLR	107120	NR_033601	114676	Mm.390292	NR_033601		4930519F09Rik	-	pyruvate dehydrogenase E1 alpha 1 pseudogene	pseudo
chr10_28815859_28816593	chr10	28815860	28816593	+	0.724092	NA	intron (NM_178666, intron 4 of 5)	intron (NM_178666, intron 4 of 5)	107281	NR_033601	114676	Mm.390292	NR_033601		4930519F09Rik	-	pyruvate dehydrogenase E1 alpha 1 pseudogene	pseudo
chr1_159999171_159999722	chr1	159999172	159999722	+	0.987532	NA	Intergenic	Intergenic	-44933	NR_028111	67647	Mm.171518	NM_001024470	ENSMUSG00000090394	4930523C07Rik	-	RIKEN cDNA 4930523C07 gene	protein-coding
chr1_160060573_160061023	chr1	160060574	160061023	+	0.796233	NA	intron (NR_028111, intron 1 of 2)	intron (NR_028111, intron 1 of 2)	16418	NM_001162896	67647	Mm.171518	NM_001024470	ENSMUSG00000090394	4930523C07Rik	-	RIKEN cDNA 4930523C07 gene	protein-coding
chr1_160052607_160052869	chr1	160052608	160052869	+	0.792064	NA	intron (NR_028111, intron 1 of 2)	intron (NR_028111, intron 1 of 2)	8358	NM_001162896	67647	Mm.171518	NM_001024470	ENSMUSG00000090394	4930523C07Rik	-	RIKEN cDNA 4930523C07 gene	protein-coding
chr1_160006002_160006511	chr1	160006003	160006511	+	0.695146	NA	Intergenic	Intergenic	-38123	NR_028111	67647	Mm.171518	NM_001024470	ENSMUSG00000090394	4930523C07Rik	-	RIKEN cDNA 4930523C07 gene	protein-coding
chr16_84682007_84682533	chr16	84682008	84682533	+	2.07245	NA	intron (NR_040537, intron 2 of 2)	intron (NR_040537, intron 2 of 2)	2481	NR_040537	78023	Mm.243853	NR_040537		4930529L06Rik	-	RIKEN cDNA 4930529L06 gene	ncRNA
chr16_84681996_84682707	chr16	84681997	84682707	+	2.06971	NA	intron (NR_040537, intron 2 of 2)	intron (NR_040537, intron 2 of 2)	2563	NR_040537	78023	Mm.243853	NR_040537		4930529L06Rik	-	RIKEN cDNA 4930529L06 gene	ncRNA
chr16_84627050_84627548	chr16	84627051	84627548	+	1.84787	NA	Intergenic	Intergenic	-52490	NR_040537	78023	Mm.243853	NR_040537		4930529L06Rik	-	RIKEN cDNA 4930529L06 gene	ncRNA
chr16_84646062_84646724	chr16	84646063	84646724	+	1.7017	NA	Intergenic	Intergenic	-33396	NR_040537	78023	Mm.243853	NR_040537		4930529L06Rik	-	RIKEN cDNA 4930529L06 gene	ncRNA
chr16_84610371_84611140	chr16	84610372	84611140	+	1.40802	NA	Intergenic	Intergenic	-69033	NR_040537	78023	Mm.243853	NR_040537		4930529L06Rik	-	RIKEN cDNA 4930529L06 gene	ncRNA
chr16_84680364_84681149	chr16	84680365	84681149	+	1.33407	NA	intron (NR_040537, intron 1 of 2)	intron (NR_040537, intron 1 of 2)	968	NR_040537	78023	Mm.243853	NR_040537		4930529L06Rik	-	RIKEN cDNA 4930529L06 gene	ncRNA
chr16_84619956_84620204	chr16	84619957	84620204	+	1.09377	NA	Intergenic	7SK|RNA|RNA	-59709	NR_040537	78023	Mm.243853	NR_040537		4930529L06Rik	-	RIKEN cDNA 4930529L06 gene	ncRNA
chr16_84603570_84604379	chr16	84603571	84604379	+	0.833522	NA	Intergenic	Intergenic	-75814	NR_040537	78023	Mm.243853	NR_040537		4930529L06Rik	-	RIKEN cDNA 4930529L06 gene	ncRNA
chr16_84616214_84616464	chr16	84616215	84616464	+	0.806902	NA	Intergenic	LTR89|LTR|ERVL?	-63450	NR_040537	78023	Mm.243853	NR_040537		4930529L06Rik	-	RIKEN cDNA 4930529L06 gene	ncRNA
chr16_84696147_84696474	chr16	84696148	84696474	+	0.788322	NA	Intergenic	RMER1B|Other|Other	16522	NR_040537	78023	Mm.243853	NR_040537		4930529L06Rik	-	RIKEN cDNA 4930529L06 gene	ncRNA
chr16_84622463_84622687	chr16	84622464	84622687	+	0.72477	NA	Intergenic	Intergenic	-57214	NR_040537	78023	Mm.243853	NR_040537		4930529L06Rik	-	RIKEN cDNA 4930529L06 gene	ncRNA
chr16_84696044_84696596	chr16	84696045	84696596	+	0.662888	NA	Intergenic	RMER1B|Other|Other	16531	NR_040537	78023	Mm.243853	NR_040537		4930529L06Rik	-	RIKEN cDNA 4930529L06 gene	ncRNA
chr4_119223700_119224522	chr4	119223701	119224522	+	1.08616	NA	Intergenic	B1_Mus1|SINE|Alu	-5894	NM_029198	75180	Mm.179335	NM_029198	ENSMUSG00000028642	4930538K18Rik	-	RIKEN cDNA 4930538K18 gene	protein-coding
chr4_119223744_119223954	chr4	119223745	119223954	+	0.749314	NA	Intergenic	Intergenic	-5632	NM_029198	75180	Mm.179335	NM_029198	ENSMUSG00000028642	4930538K18Rik	-	RIKEN cDNA 4930538K18 gene	protein-coding
chr3_9151601_9151948	chr3	9151602	9151948	+	0.939786	NA	Intergenic	Intergenic	89811	NR_040597	75149	Mm.399324	NR_040597		4930539M17Rik	-	RIKEN cDNA 4930539M17 gene	ncRNA
chr16_38016889_38017475	chr16	38016890	38017475	+	0.69049	NA	promoter-TSS (NR_040565)	promoter-TSS (NR_040565)	-141	NR_040565	75175	Mm.399335	NR_040565		4930542C21Rik	-	RIKEN cDNA 4930542C21 gene	ncRNA
chr7_113139892_113140709	chr7	113139893	113140709	+	0.77368	NA	intron (NR_045978, intron 2 of 5)	intron (NR_045978, intron 2 of 5)	1714	NR_045978	75239	Mm.381688	NR_045978		4930543E12Rik	4930545H14Rik	RIKEN cDNA 4930543E12 gene	ncRNA
chr10_68356136_68356476	chr10	68356137	68356476	+	0.894513	NA	Intergenic	Intergenic	-35164	NR_045357	75148	Mm.23505	NR_045357		4930545H06Rik	-	RIKEN cDNA 4930545H06 gene	ncRNA
chr9_42209575_42210210	chr9	42209576	42210210	+	1.53876	NA	promoter-TSS (NR_040754)	promoter-TSS (NR_040754)	-662	NR_040754	78194	Mm.251457	NR_040754		4930546K05Rik	-	RIKEN cDNA 4930546K05 gene	ncRNA
chr9_42214157_42214505	chr9	42214158	42214505	+	1.49879	NA	Intergenic	MLT1A|LTR|ERVL-MaLR	-5100	NR_040754	78194	Mm.251457	NR_040754		4930546K05Rik	-	RIKEN cDNA 4930546K05 gene	ncRNA
chr9_42208515_42209474	chr9	42208516	42209474	+	0.854279	NA	intron (NR_040754, intron 1 of 6)	MIRb|SINE|MIR	236	NR_040754	78194	Mm.251457	NR_040754		4930546K05Rik	-	RIKEN cDNA 4930546K05 gene	ncRNA
chr16_59605449_59605785	chr16	59605450	59605785	+	1.1652	NA	Intergenic	Intergenic	-31328	NR_040564	75145	Mm.399348	NR_040564		4930547E14Rik	-	RIKEN cDNA 4930547E14 gene	ncRNA
chr16_59624364_59624848	chr16	59624365	59624848	+	1.00982	NA	intron (NM_019665, intron 2 of 7)	intron (NM_019665, intron 2 of 7)	-12339	NR_040564	75145	Mm.399348	NR_040564		4930547E14Rik	-	RIKEN cDNA 4930547E14 gene	ncRNA
chr9_53452125_53452778	chr9	53452126	53452778	+	1.93864	NA	intron (NM_007499, intron 55 of 63)	intron (NM_007499, intron 55 of 63)	47166	NM_029247	75311	Mm.26078	NM_029247	ENSMUSG00000005131	4930550C14Rik	AU017961	RIKEN cDNA 4930550C14 gene	protein-coding
chr9_53435909_53436559	chr9	53435910	53436559	+	0.830792	NA	TTS (NM_007499)	TTS (NM_007499)	30948	NM_029247	75311	Mm.26078	NM_029247	ENSMUSG00000005131	4930550C14Rik	AU017961	RIKEN cDNA 4930550C14 gene	protein-coding
chr9_53435482_53436497	chr9	53435483	53436497	+	0.830531	NA	Intergenic	URR1B|DNA|hAT-Charlie	30704	NM_029247	75311	Mm.26078	NM_029247	ENSMUSG00000005131	4930550C14Rik	AU017961	RIKEN cDNA 4930550C14 gene	protein-coding
chr9_53405843_53406132	chr9	53405844	53406132	+	0.616255	NA	intron (NM_029247, intron 1 of 8)	intron (NM_029247, intron 1 of 8)	702	NM_029247	75311	Mm.26078	NM_029247	ENSMUSG00000005131	4930550C14Rik	AU017961	RIKEN cDNA 4930550C14 gene	protein-coding
chr19_55712750_55713081	chr19	55712751	55713081	+	0.877712	NA	Intergenic	Intergenic	-10712	NR_045318	77594	Mm.329924	NR_045318	ENSMUSG00000097632	4930552P12Rik	-	RIKEN cDNA 4930552P12 gene	ncRNA
chr16_84477433_84478350	chr16	84477434	84478350	+	0.920034	NA	Intergenic	Intergenic	106749	NR_040567	75247	Mm.417813	NR_040567		4930553E22Rik	-	RIKEN cDNA 4930553E22 gene	ncRNA
chr16_82789214_82789876	chr16	82789215	82789876	+	0.907114	NA	Intergenic	MTD|LTR|ERVL-MaLR	-1581598	NR_040567	75247	Mm.417813	NR_040567		4930553E22Rik	-	RIKEN cDNA 4930553E22 gene	ncRNA
chr2_57184733_57185357	chr2	57184734	57185357	+	1.13461	NA	intron (NR_040633, intron 1 of 3)	intron (NR_040633, intron 1 of 3)	3214	NR_040633	75279	Mm.401987	NR_040633	ENSMUSG00000086396	4930555B11Rik	-	RIKEN cDNA 4930555B11 gene	ncRNA
chr3_95405623_95405987	chr3	95405624	95405987	+	0.653263	NA	Intergenic	ORR1C2|LTR|ERVL-MaLR	-2964	NR_015490	67654	Mm.75066	NR_015490		4930558C23Rik	-	RIKEN cDNA 4930558C23 gene	ncRNA
chr8_116799471_116800021	chr8	116799472	116800021	+	1.09152	NA	intron (NR_046193, intron 2 of 3)	MTD|LTR|ERVL-MaLR	1666	NR_046193	78213	Mm.402039	NR_046193		4930563M20Rik	-	RIKEN cDNA 4930563M20 gene	ncRNA
chr3_105059880_105060376	chr3	105059881	105060376	+	0.833312	NA	Intergenic	Intergenic	-6716	NM_029228	75269	Mm.307994	NM_029228	ENSMUSG00000051788	4930564D02Rik	-	RIKEN cDNA 4930564D02 gene	protein-coding
chr3_105090995_105091524	chr3	105090996	105091524	+	0.791165	NA	Intergenic	Intergenic	24416	NM_029228	75269	Mm.307994	NM_029228	ENSMUSG00000051788	4930564D02Rik	-	RIKEN cDNA 4930564D02 gene	protein-coding
chr3_105090997_105091276	chr3	105090998	105091276	+	0.781812	NA	Intergenic	Intergenic	24293	NM_029228	75269	Mm.307994	NM_029228	ENSMUSG00000051788	4930564D02Rik	-	RIKEN cDNA 4930564D02 gene	protein-coding
chr3_84388258_84389288	chr3	84388259	84389288	+	1.70185	NA	Intergenic	L1ME3|LINE|L1	-8852	NR_040752	75309	Mm.159497	NR_040752		4930565D16Rik	-	RIKEN cDNA 4930565D16 gene	ncRNA
chr3_84355851_84356275	chr3	84355852	84356275	+	1.09913	NA	intron (NR_040752, intron 3 of 3)	MER20|DNA|hAT-Charlie	23858	NR_040752	75309	Mm.159497	NR_040752		4930565D16Rik	-	RIKEN cDNA 4930565D16 gene	ncRNA
chr3_84427760_84428472	chr3	84427761	84428472	+	0.971076	NA	Intergenic	Intergenic	-48195	NR_040752	75309	Mm.159497	NR_040752		4930565D16Rik	-	RIKEN cDNA 4930565D16 gene	ncRNA
chr2_35381727_35382472	chr2	35381728	35382472	+	1.47745	NA	intron (NM_001080709, intron 4 of 5)	L1VL2|LINE|L1	-14371	NM_029463	75859	Mm.159604	NM_029463	ENSMUSG00000026882	4930568D16Rik	Ggta1l1	RIKEN cDNA 4930568D16 gene	protein-coding
chr14_25189071_25189866	chr14	25189072	25189866	+	1.69401	NA	Intergenic	MIRb|SINE|MIR	-46228	NR_045718	75862	Mm.109191	NR_045718		4930572O13Rik	-	RIKEN cDNA 4930572O13 gene	ncRNA
chr2_52189005_52189435	chr2	52189006	52189435	+	0.837971	NA	intron (NM_010889, intron 120 of 156)	intron (NM_010889, intron 120 of 156)	-101782	NR_040620	78049	Mm.243883	NR_040620		4930573O16Rik	-	RIKEN cDNA 4930573O16 gene	ncRNA
chr3_51254817_51255262	chr3	51254818	51255262	+	0.693973	NA	3' UTR (NM_001291059, exon 10 of 10)	3' UTR (NM_001291059, exon 10 of 10)	-21721	NR_073429	67746	Mm.441177	NR_073429		4930577N17Rik	-	RIKEN cDNA 4930577N17 gene	ncRNA
chr15_98986296_98986591	chr15	98986297	98986591	+	0.953251	NA	intron (NR_045991, intron 1 of 3)	intron (NR_045991, intron 1 of 3)	479	NR_045991	75951	Mm.441657	NR_045991	ENSMUSG00000097587	4930578M01Rik	3010001K12Rik	RIKEN cDNA 4930578M01 gene	ncRNA
chr16_76183573_76183920	chr16	76183574	76183920	+	1.22712	NA	Intergenic	Intergenic	61134	NR_040575	78215	Mm.243885	NR_040575		4930578N18Rik	-	RIKEN cDNA 4930578N18 gene	ncRNA
chr16_76118670_76119161	chr16	76118671	76119161	+	0.815904	NA	Intergenic	MTD|LTR|ERVL-MaLR	-3697	NR_040575	78215	Mm.243885	NR_040575		4930578N18Rik	-	RIKEN cDNA 4930578N18 gene	ncRNA
chr3_58696883_58697197	chr3	58696884	58697197	+	0.877159	NA	intron (NR_045167, intron 2 of 7)	intron (NR_045167, intron 2 of 7)	4451	NR_045167	71301	Mm.254475	NR_045167	ENSMUSG00000097725	4930593A02Rik	4933440I01Rik	RIKEN cDNA 4930593A02 gene	ncRNA
chr1_139009556_139010162	chr1	139009557	139010162	+	0.716412	NA	intron (NM_181347, intron 1 of 20)	intron (NM_181347, intron 1 of 20)	32202	NR_108103	78229	Mm.437838	NR_108103		4930596I21Rik	-	RIKEN cDNA 4930596I21 gene	ncRNA
chr1_138994932_138995436	chr1	138994933	138995436	+	0.67654	NA	intron (NM_181347, intron 1 of 20)	ORR1B1|LTR|ERVL-MaLR	17527	NR_108103	78229	Mm.437838	NR_108103		4930596I21Rik	-	RIKEN cDNA 4930596I21 gene	ncRNA
chr7_34321733_34322453	chr7	34321734	34322453	+	1.8219	NA	Intergenic	Intergenic	-36484	NM_172741	233103	Mm.491097	NM_172741	ENSMUSG00000066571	4931406P16Rik	AA553327|mKIAA0355	RIKEN cDNA 4931406P16 gene	protein-coding
chr6_73368054_73368687	chr6	73368055	73368687	+	0.851069	NA	Intergenic	RSINE1|SINE|B4	101296	NM_025737	66740	Mm.440760	NM_025737	ENSMUSG00000056197	4931417E11Rik	-	RIKEN cDNA 4931417E11 gene	protein-coding
chr9_40920047_40920567	chr9	40920048	40920567	+	1.62196	NA	intron (NM_001081121, intron 4 of 8)	intron (NM_001081121, intron 4 of 8)	43805	NM_001081121	70989	Mm.335087	NM_001081121	ENSMUSG00000032023	4931429I11Rik	BB239335|jhy	RIKEN cDNA 4931429I11 gene	protein-coding
chr9_40933370_40933695	chr9	40933371	40933695	+	0.891174	NA	intron (NM_001081121, intron 3 of 8)	intron (NM_001081121, intron 3 of 8)	30579	NM_001081121	70989	Mm.335087	NM_001081121	ENSMUSG00000032023	4931429I11Rik	BB239335|jhy	RIKEN cDNA 4931429I11 gene	protein-coding
chr5_35609432_35610237	chr5	35609433	35610237	+	0.748405	NA	intron (NM_030721, intron 18 of 18)	intron (NM_030721, intron 18 of 18)	-21072	NR_045807	74364	Mm.473123	NM_175208	ENSMUSG00000055061	4931431C16Rik	-	RIKEN cDNA 4931431C16 gene	ncRNA
chr11_29810378_29810722	chr11	29810379	29810722	+	1.24794	NA	intron (NM_146016, intron 16 of 41)	intron (NM_146016, intron 16 of 41)	15118	NM_176829	216622	Mm.443260	NM_176829	ENSMUSG00000078157	4931440F15Rik	Fem1ab	RIKEN cDNA 4931440F15 gene	protein-coding
chr11_29799061_29800330	chr11	29799062	29800330	+	1.1061	NA	intron (NM_146016, intron 21 of 41)	MuLV-int|LTR|ERV1	25972	NM_176829	216622	Mm.443260	NM_176829	ENSMUSG00000078157	4931440F15Rik	Fem1ab	RIKEN cDNA 4931440F15 gene	protein-coding
chr11_29807379_29807702	chr11	29807380	29807702	+	0.74236	NA	intron (NM_146016, intron 17 of 41)	intron (NM_146016, intron 17 of 41)	18127	NM_176829	216622	Mm.443260	NM_176829	ENSMUSG00000078157	4931440F15Rik	Fem1ab	RIKEN cDNA 4931440F15 gene	protein-coding
chr3_65534487_65534968	chr3	65534488	65534968	+	0.660434	NA	intron (NM_178892, intron 2 of 5)	intron (NM_178892, intron 2 of 5)	-5314	NR_027955	71004	Mm.475465	NM_001033527	ENSMUSG00000074580	4931440P22Rik	-	RIKEN cDNA 4931440P22 gene	ncRNA
chr3_36956589_36956820	chr3	36956590	36956820	+	0.668363	NA	exon (NM_172679, exon 34 of 86)	exon (NM_172679, exon 34 of 86)	93599	NM_172679	229227	Mm.207907	NM_172679	ENSMUSG00000037270	4932438A13Rik	4732443H21|B830039D19Rik|D630029K19Rik|FSA|Kiaa1109|Tweek	RIKEN cDNA 4932438A13 gene	protein-coding
chr13_23298512_23299622	chr13	23298513	23299622	+	1.28903	NA	Intergenic	tRNA-Ala-GCY|tRNA|tRNA	20717	NR_046038	74061	Mm.399501	NR_046038	ENSMUSG00000085122	4933404K08Rik	-	RIKEN cDNA 4933404K08 gene	ncRNA
chr13_23307060_23307900	chr13	23307061	23307900	+	0.956356	NA	Intergenic	Intergenic	29130	NR_046038	74061	Mm.399501	NR_046038	ENSMUSG00000085122	4933404K08Rik	-	RIKEN cDNA 4933404K08 gene	ncRNA
chr13_23270315_23270832	chr13	23270316	23270832	+	0.866727	NA	Intergenic	Intergenic	-7776	NR_046038	74061	Mm.399501	NR_046038	ENSMUSG00000085122	4933404K08Rik	-	RIKEN cDNA 4933404K08 gene	ncRNA
chr13_23285122_23286373	chr13	23285123	23286373	+	0.796948	NA	Intergenic	Intergenic	7398	NR_046038	74061	Mm.399501	NR_046038	ENSMUSG00000085122	4933404K08Rik	-	RIKEN cDNA 4933404K08 gene	ncRNA
chr11_54187827_54188316	chr11	54187828	54188316	+	1.0139	NA	intron (NR_045506, intron 2 of 2)	L1MC2|LINE|L1	25216	NR_045506	71056	Mm.56332	NR_045506	ENSMUSG00000086209	4933405E24Rik	-	RIKEN cDNA 4933405E24 gene	ncRNA
chr11_54217399_54217867	chr11	54217400	54217867	+	0.760104	NA	Intergenic	Intergenic	-4345	NR_045506	71056	Mm.56332	NR_045506	ENSMUSG00000086209	4933405E24Rik	-	RIKEN cDNA 4933405E24 gene	ncRNA
chr2_146628815_146629300	chr2	146628816	146629300	+	0.725016	NA	Intergenic	Intergenic	86127	NR_040502	74065	Mm.399508	NR_040502	ENSMUSG00000085796	4933406D12Rik	-	RIKEN cDNA 4933406D12 gene	ncRNA
chr12_107127546_107128135	chr12	107127547	107128135	+	1.37899	NA	Intergenic	Intergenic	-411517	NR_015512	71033	Mm.159404	NR_015512	ENSMUSG00000085820	4933406K04Rik	4930426M03Rik|4930485I22Rik|4933427G14Rik	RIKEN cDNA 4933406K04 gene	ncRNA
chr12_107180499_107180847	chr12	107180500	107180847	+	1.29379	NA	Intergenic	Intergenic	-464349	NR_015512	71033	Mm.159404	NR_015512	ENSMUSG00000085820	4933406K04Rik	4930426M03Rik|4930485I22Rik|4933427G14Rik	RIKEN cDNA 4933406K04 gene	ncRNA
chr12_106649424_106649831	chr12	106649425	106649831	+	1.10636	NA	Intergenic	B3|SINE|B2	66696	NR_015512	71033	Mm.159404	NR_015512	ENSMUSG00000085820	4933406K04Rik	4930426M03Rik|4930485I22Rik|4933427G14Rik	RIKEN cDNA 4933406K04 gene	ncRNA
chr12_106649433_106650016	chr12	106649434	106650016	+	1.04867	NA	Intergenic	L1ME3E|LINE|L1	66599	NR_015512	71033	Mm.159404	NR_015512	ENSMUSG00000085820	4933406K04Rik	4930426M03Rik|4930485I22Rik|4933427G14Rik	RIKEN cDNA 4933406K04 gene	ncRNA
chr12_107134992_107135337	chr12	107134993	107135337	+	0.900873	NA	Intergenic	Intergenic	-418841	NR_015512	71033	Mm.159404	NR_015512	ENSMUSG00000085820	4933406K04Rik	4930426M03Rik|4930485I22Rik|4933427G14Rik	RIKEN cDNA 4933406K04 gene	ncRNA
chr12_107132534_107132848	chr12	107132535	107132848	+	0.78373	NA	Intergenic	MIRc|SINE|MIR	-416367	NR_015512	71033	Mm.159404	NR_015512	ENSMUSG00000085820	4933406K04Rik	4930426M03Rik|4930485I22Rik|4933427G14Rik	RIKEN cDNA 4933406K04 gene	ncRNA
chr12_107145410_107145835	chr12	107145411	107145835	+	0.745551	NA	Intergenic	Intergenic	-429299	NR_015512	71033	Mm.159404	NR_015512	ENSMUSG00000085820	4933406K04Rik	4930426M03Rik|4930485I22Rik|4933427G14Rik	RIKEN cDNA 4933406K04 gene	ncRNA
chr12_106649423_106650235	chr12	106649424	106650235	+	0.730232	NA	Intergenic	Intergenic	66495	NR_015512	71033	Mm.159404	NR_015512	ENSMUSG00000085820	4933406K04Rik	4930426M03Rik|4930485I22Rik|4933427G14Rik	RIKEN cDNA 4933406K04 gene	ncRNA
chr12_106769006_106770027	chr12	106769007	106770027	+	0.681817	NA	Intergenic	Intergenic	-53193	NR_015512	71033	Mm.159404	NR_015512	ENSMUSG00000085820	4933406K04Rik	4930426M03Rik|4930485I22Rik|4933427G14Rik	RIKEN cDNA 4933406K04 gene	ncRNA
chr12_107146578_107147718	chr12	107146579	107147718	+	0.629317	NA	Intergenic	Intergenic	-430824	NR_015512	71033	Mm.159404	NR_015512	ENSMUSG00000085820	4933406K04Rik	4930426M03Rik|4930485I22Rik|4933427G14Rik	RIKEN cDNA 4933406K04 gene	ncRNA
chr10_75433289_75433725	chr10	75433290	75433725	+	1.06785	NA	intron (NM_133995, intron 6 of 9)	intron (NM_133995, intron 6 of 9)	-16003	NR_045841	71125	Mm.399516	NR_045841		4933407G14Rik	-	RIKEN cDNA 4933407G14 gene	ncRNA
chr10_75434404_75434931	chr10	75434405	75434931	+	0.806154	NA	intron (NM_133995, intron 6 of 9)	intron (NM_133995, intron 6 of 9)	-14842	NR_045841	71125	Mm.399516	NR_045841		4933407G14Rik	-	RIKEN cDNA 4933407G14 gene	ncRNA
chrX_75711870_75712386	chrX	75711871	75712386	+	0.886286	NA	Intergenic	Intergenic	52571	NR_029443	74396	Mm.162493	NR_029443	ENSMUSG00000087396	4933407K13Rik	A130080L05Rik	RIKEN cDNA 4933407K13 gene	ncRNA
chr1_85936801_85937980	chr1	85936802	85937980	+	1.29497	NA	Intergenic	Intergenic	8908	NR_037692	71141	Mm.314965	NR_037692	ENSMUSG00000026224	4933407L21Rik	-	RIKEN cDNA 4933407L21 gene	ncRNA
chr1_85936727_85937242	chr1	85936728	85937242	+	0.997327	NA	Intergenic	Intergenic	8502	NR_037692	71141	Mm.314965	NR_037692	ENSMUSG00000026224	4933407L21Rik	-	RIKEN cDNA 4933407L21 gene	ncRNA
chr1_85933249_85933534	chr1	85933250	85933534	+	0.943348	NA	Intergenic	LTR48B|LTR|ERV1	4909	NR_037692	71141	Mm.314965	NR_037692	ENSMUSG00000026224	4933407L21Rik	-	RIKEN cDNA 4933407L21 gene	ncRNA
chr8_114351728_114352446	chr8	114351729	114352446	+	1.02818	NA	promoter-TSS (NR_045831)	promoter-TSS (NR_045831)	-609	NR_045831	71122	Mm.437539	NR_045831		4933408N05Rik	-	RIKEN cDNA 4933408N05 gene	ncRNA
chr2_68530241_68530589	chr2	68530242	68530589	+	0.81479	NA	Intergenic	MTEb|LTR|ERVL-MaLR	-51998	NM_177651	227998	Mm.67562	NM_177651	ENSMUSG00000053896	4933409G03Rik	-	RIKEN cDNA 4933409G03 gene	protein-coding
chr10_117910381_117910932	chr10	117910382	117910932	+	1.51815	NA	Intergenic	MER44B|DNA|TcMar-Tigger	-14802	NR_045342	71067	Mm.410793	NR_045342		4933411E08Rik	-	RIKEN cDNA 4933411E08 gene	ncRNA
chr10_117987579_117988516	chr10	117987580	117988516	+	1.37378	NA	Intergenic	Intergenic	62589	NR_045342	71067	Mm.410793	NR_045342		4933411E08Rik	-	RIKEN cDNA 4933411E08 gene	ncRNA
chr10_117938486_117939285	chr10	117938487	117939285	+	1.13244	NA	intron (NR_045342, intron 3 of 3)	intron (NR_045342, intron 3 of 3)	13427	NR_045342	71067	Mm.410793	NR_045342		4933411E08Rik	-	RIKEN cDNA 4933411E08 gene	ncRNA
chr10_117985026_117985597	chr10	117985027	117985597	+	1.08018	NA	Intergenic	Intergenic	59853	NR_045342	71067	Mm.410793	NR_045342		4933411E08Rik	-	RIKEN cDNA 4933411E08 gene	ncRNA
chr10_117984770_117985632	chr10	117984771	117985632	+	1.03003	NA	Intergenic	Intergenic	59742	NR_045342	71067	Mm.410793	NR_045342		4933411E08Rik	-	RIKEN cDNA 4933411E08 gene	ncRNA
chr10_117909220_117909527	chr10	117909221	117909527	+	1.01038	NA	Intergenic	Intergenic	-16085	NR_045342	71067	Mm.410793	NR_045342		4933411E08Rik	-	RIKEN cDNA 4933411E08 gene	ncRNA
chr10_117916341_117916599	chr10	117916342	117916599	+	0.824441	NA	Intergenic	Intergenic	-8989	NR_045342	71067	Mm.410793	NR_045342		4933411E08Rik	-	RIKEN cDNA 4933411E08 gene	ncRNA
chr10_117909690_117910333	chr10	117909691	117910333	+	0.805399	NA	Intergenic	Intergenic	-15447	NR_045342	71067	Mm.410793	NR_045342		4933411E08Rik	-	RIKEN cDNA 4933411E08 gene	ncRNA
chr10_117940523_117941303	chr10	117940524	117941303	+	0.801107	NA	intron (NR_045342, intron 3 of 3)	intron (NR_045342, intron 3 of 3)	15454	NR_045342	71067	Mm.410793	NR_045342		4933411E08Rik	-	RIKEN cDNA 4933411E08 gene	ncRNA
chr10_117976178_117976664	chr10	117976179	117976664	+	0.791561	NA	Intergenic	MER4B-int|LTR|ERV1	50962	NR_045342	71067	Mm.410793	NR_045342		4933411E08Rik	-	RIKEN cDNA 4933411E08 gene	ncRNA
chr10_117976345_117976664	chr10	117976346	117976664	+	0.70182	NA	Intergenic	MER4B-int|LTR|ERV1	51046	NR_045342	71067	Mm.410793	NR_045342		4933411E08Rik	-	RIKEN cDNA 4933411E08 gene	ncRNA
chr15_60110984_60111580	chr15	60110985	60111580	+	0.948075	NA	Intergenic	Intergenic	-94664	NM_027668	71088	Mm.425950	NM_027668	ENSMUSG00000071749	4933412E24Rik	-	RIKEN cDNA 4933412E24 gene	protein-coding
chr15_60101294_60101887	chr15	60101295	60101887	+	0.655315	NA	Intergenic	B4|SINE|B4	-84973	NM_027668	71088	Mm.425950	NM_027668	ENSMUSG00000071749	4933412E24Rik	-	RIKEN cDNA 4933412E24 gene	protein-coding
chr15_60101571_60101824	chr15	60101572	60101824	+	0.641124	NA	Intergenic	B4|SINE|B4	-85080	NM_027668	71088	Mm.425950	NM_027668	ENSMUSG00000071749	4933412E24Rik	-	RIKEN cDNA 4933412E24 gene	protein-coding
chr13_15777605_15778218	chr13	15777606	15778218	+	1.16392	NA	Intergenic	Intergenic	24718	NR_045507	71071	Mm.380845	NR_045507		4933412O06Rik	-	RIKEN cDNA 4933412O06 gene	ncRNA
chr9_35323516_35324291	chr9	35323517	35324291	+	1.11061	NA	Intergenic	ORR1E|LTR|ERVL-MaLR	42799	NR_040715	71133	Mm.158577	NR_040715		4933422A05Rik	-	RIKEN cDNA 4933422A05 gene	ncRNA
chr1_36722477_36723100	chr1	36722478	36723100	+	1.07843	NA	intron (NR_040290, intron 2 of 8)	intron (NR_040290, intron 2 of 8)	8251	NR_040290	71166	Mm.157049	NR_040290		4933424G06Rik	1700104I15Rik	RIKEN cDNA 4933424G06 gene	ncRNA
chr14_46671056_46671466	chr14	46671057	46671466	+	0.76328	NA	Intergenic	Intergenic	-33838	NR_046460	74458	Mm.390708	NR_046460		4933425B07Rik	-	RIKEN cDNA 4933425B07 gene	ncRNA
chr6_89068269_89068683	chr6	89068270	89068683	+	0.772374	NA	Intergenic	Intergenic	-27639	NM_175017	232217	Mm.281744	NM_175017	ENSMUSG00000055403	4933427D06Rik	-	RIKEN cDNA 4933427D06 gene	protein-coding
chr14_48804112_48804415	chr14	48804113	48804415	+	0.716602	NA	Intergenic	Intergenic	-74609	NR_033783	66770	Mm.136954	NR_033783		4933429O19Rik	1700031B11Rik	RIKEN cDNA 4933429O19 gene	ncRNA
chr7_82976612_82977050	chr7	82976613	82977050	+	0.794402	NA	Intergenic	URR1A|DNA|hAT-Charlie	-5440	NR_045855	71285	Mm.76818	NR_045855		4933430H16Rik	-	RIKEN cDNA 4933430H16 gene	ncRNA
chr7_82976603_82977299	chr7	82976604	82977299	+	0.78548	NA	Intergenic	L1M5|LINE|L1	-5560	NR_045855	71285	Mm.76818	NR_045855		4933430H16Rik	-	RIKEN cDNA 4933430H16 gene	ncRNA
chr7_83261539_83261860	chr7	83261540	83261860	+	0.695638	NA	Intergenic	MLT1H|LTR|ERVL-MaLR	-290309	NR_045855	71285	Mm.76818	NR_045855		4933430H16Rik	-	RIKEN cDNA 4933430H16 gene	ncRNA
chr6_72140235_72140844	chr6	72140236	72140844	+	1.67334	NA	intron (NM_001035228, intron 3 of 6)	intron (NM_001035228, intron 3 of 6)	-17343	NR_045165	71265	Mm.442035	NR_045163		4933431G14Rik	4930565C19Rik	RIKEN cDNA 4933431G14 gene	ncRNA
chr6_72140227_72141195	chr6	72140228	72141195	+	1.59169	NA	intron (NM_001035228, intron 3 of 6)	intron (NM_001035228, intron 3 of 6)	-17514	NR_045165	71265	Mm.442035	NR_045163		4933431G14Rik	4930565C19Rik	RIKEN cDNA 4933431G14 gene	ncRNA
chr6_72113293_72113663	chr6	72113294	72113663	+	1.16627	NA	intron (NM_011375, intron 1 of 6)	MTC|LTR|ERVL-MaLR	9462	NR_045163	71265	Mm.442035	NR_045163		4933431G14Rik	4930565C19Rik	RIKEN cDNA 4933431G14 gene	ncRNA
chr9_118381929_118382403	chr9	118381930	118382403	+	1.00649	NA	Intergenic	L1MB5|LINE|L1	-47673	NR_040716	71196	Mm.73218	NR_040716		4933432G23Rik	-	RIKEN cDNA 4933432G23 gene	ncRNA
chr9_118424144_118424803	chr9	118424145	118424803	+	0.952359	NA	Intergenic	Intergenic	-5365	NR_040716	71196	Mm.73218	NR_040716		4933432G23Rik	-	RIKEN cDNA 4933432G23 gene	ncRNA
chr9_118420907_118421436	chr9	118420908	118421436	+	0.771789	NA	Intergenic	Intergenic	-8667	NR_040716	71196	Mm.73218	NR_040716		4933432G23Rik	-	RIKEN cDNA 4933432G23 gene	ncRNA
chr9_118360838_118361565	chr9	118360839	118361565	+	0.715456	NA	Intergenic	Intergenic	-68637	NR_040716	71196	Mm.73218	NR_040716		4933432G23Rik	-	RIKEN cDNA 4933432G23 gene	ncRNA
chr9_118374509_118375238	chr9	118374510	118375238	+	0.681529	NA	Intergenic	Intergenic	-54965	NR_040716	71196	Mm.73218	NR_040716		4933432G23Rik	-	RIKEN cDNA 4933432G23 gene	ncRNA
chr14_103033285_103033934	chr14	103033286	103033934	+	0.973981	NA	intron (NR_045657, intron 1 of 2)	intron (NR_045657, intron 1 of 2)	193	NR_045657	71264	Mm.399572	NR_045657		4933432I03Rik	-	RIKEN cDNA 4933432I03 gene	ncRNA
chr14_103037028_103037398	chr14	103037029	103037398	+	0.971001	NA	Intergenic	Intergenic	-3410	NR_045657	71264	Mm.399572	NR_045657		4933432I03Rik	-	RIKEN cDNA 4933432I03 gene	ncRNA
chr16_18194974_18195482	chr16	18194975	18195482	+	0.65676	NA	Intergenic	Intergenic	18305	NR_027843	66779	Mm.387525	NR_015575		4933432I09Rik	-	RIKEN cDNA 4933432I09 gene	ncRNA
chr13_67028319_67028646	chr13	67028320	67028646	+	0.94648	NA	intron (NR_045851, intron 1 of 8)	L1_Rod|LINE|L1	3922	NR_045851	71226	Mm.399574	NR_045851		4933433G19Rik	-	RIKEN cDNA 4933433G19 gene	ncRNA
chr17_84010571_84010831	chr17	84010572	84010831	+	0.750174	NA	Intergenic	B3|SINE|B2	-67959	NR_045458	74473	Mm.399575	NR_045458		4933433H22Rik	-	RIKEN cDNA 4933433H22 gene	ncRNA
chr17_84010576_84010958	chr17	84010577	84010958	+	0.726288	NA	Intergenic	B3|SINE|B2	-67893	NR_045458	74473	Mm.399575	NR_045458		4933433H22Rik	-	RIKEN cDNA 4933433H22 gene	ncRNA
chr7_68478678_68479380	chr7	68478679	68479380	+	0.871057	NA	Intergenic	Intergenic	61605	NR_046208	71244	Mm.410787	NR_046208		4933436H12Rik	-	RIKEN cDNA 4933436H12 gene	ncRNA
chr10_111619482_111620483	chr10	111619483	111620483	+	1.04168	NA	Intergenic	L2|LINE|L2	-25710	NR_045344	71321	Mm.410785	NR_045344	ENSMUSG00000097082	4933440J02Rik	-	RIKEN cDNA 4933440J02 gene	ncRNA
chr10_111571091_111571417	chr10	111571092	111571417	+	0.786745	NA	Intergenic	ORR1F|LTR|ERVL-MaLR	23019	NR_045344	71321	Mm.410785	NR_045344	ENSMUSG00000097082	4933440J02Rik	-	RIKEN cDNA 4933440J02 gene	ncRNA
chr10_111575978_111576303	chr10	111575979	111576303	+	0.68673	NA	Intergenic	Intergenic	18132	NR_045344	71321	Mm.410785	NR_045344	ENSMUSG00000097082	4933440J02Rik	-	RIKEN cDNA 4933440J02 gene	ncRNA
chr7_125189767_125190537	chr7	125189768	125190537	+	0.988414	NA	Intergenic	MLTR18B_MM|LTR|ERVK	159634	NR_045804	71208	Mm.159465	NM_172408		4933440M02Rik	-	RIKEN cDNA 4933440M02 gene	ncRNA
chr7_125191823_125192509	chr7	125191824	125192509	+	0.966061	NA	Intergenic	L1_Rod|LINE|L1	157620	NR_045804	71208	Mm.159465	NM_172408		4933440M02Rik	-	RIKEN cDNA 4933440M02 gene	ncRNA
chr7_125190005_125190452	chr7	125190006	125190452	+	0.940209	NA	Intergenic	MLTR18B_MM|LTR|ERVK	159557	NR_045804	71208	Mm.159465	NM_172408		4933440M02Rik	-	RIKEN cDNA 4933440M02 gene	ncRNA
chr7_125191354_125191670	chr7	125191355	125191670	+	0.874879	NA	Intergenic	L1_Rod|LINE|L1	158274	NR_045804	71208	Mm.159465	NM_172408		4933440M02Rik	-	RIKEN cDNA 4933440M02 gene	ncRNA
chr14_74996294_74997075	chr14	74996295	74997075	+	0.955744	NA	Intergenic	Intergenic	-19342	NM_198642	271221	Mm.320280	NM_198642	ENSMUSG00000034959	5031414D18Rik	Gm744|Gm911|Kiaa0226l	RIKEN cDNA 5031414D18 gene	protein-coding
chr14_75045001_75045793	chr14	75045002	75045793	+	0.947841	NA	intron (NM_198642, intron 9 of 13)	intron (NM_198642, intron 9 of 13)	29370	NM_198642	271221	Mm.320280	NM_198642	ENSMUSG00000034959	5031414D18Rik	Gm744|Gm911|Kiaa0226l	RIKEN cDNA 5031414D18 gene	protein-coding
chr14_74996438_74997451	chr14	74996439	74997451	+	0.721324	NA	Intergenic	Intergenic	-19082	NM_198642	271221	Mm.320280	NM_198642	ENSMUSG00000034959	5031414D18Rik	Gm744|Gm911|Kiaa0226l	RIKEN cDNA 5031414D18 gene	protein-coding
chr14_75005743_75006167	chr14	75005744	75006167	+	0.71206	NA	intron (NR_030568, intron 3 of 3)	intron (NR_030568, intron 3 of 3)	-10072	NM_198642	271221	Mm.320280	NM_198642	ENSMUSG00000034959	5031414D18Rik	Gm744|Gm911|Kiaa0226l	RIKEN cDNA 5031414D18 gene	protein-coding
chr5_23401977_23402383	chr5	23401978	23402383	+	0.782378	NA	Intergenic	Intergenic	32173	NR_040469	269630	Mm.425231	NR_040469	ENSMUSG00000073147	5031425E22Rik	-	RIKEN cDNA 5031425E22 gene	ncRNA
chr5_23413746_23413972	chr5	23413747	23413972	+	0.778054	NA	Intergenic	Intergenic	20494	NR_040469	269630	Mm.425231	NR_040469	ENSMUSG00000073147	5031425E22Rik	-	RIKEN cDNA 5031425E22 gene	ncRNA
chr5_23416145_23416559	chr5	23416146	23416559	+	0.687881	NA	Intergenic	Intergenic	18001	NR_040469	269630	Mm.425231	NR_040469	ENSMUSG00000073147	5031425E22Rik	-	RIKEN cDNA 5031425E22 gene	ncRNA
chr2_166398969_166400061	chr2	166398970	166400061	+	1.14733	NA	Intergenic	Intergenic	-47936	NR_015558	319684	Mm.399746	NR_015558		5031425F14Rik	-	RIKEN cDNA 5031425F14 gene	ncRNA
chr2_131840494_131841676	chr2	131840495	131841676	+	1.07241	NA	intron (NR_029381, intron 1 of 2)	intron (NR_029381, intron 1 of 2)	6571	NR_029381	414081	Mm.246905	NR_029381	ENSMUSG00000086822	5330413P13Rik	-	RIKEN cDNA 5330413P13 gene	ncRNA
chr2_131840947_131841650	chr2	131840948	131841650	+	1.00926	NA	intron (NR_029381, intron 1 of 2)	MER21C|LTR|ERVL	6357	NR_029381	414081	Mm.246905	NR_029381	ENSMUSG00000086822	5330413P13Rik	-	RIKEN cDNA 5330413P13 gene	ncRNA
chr2_131841136_131841658	chr2	131841137	131841658	+	0.913871	NA	intron (NR_029381, intron 1 of 2)	MER21C|LTR|ERVL	6259	NR_029381	414081	Mm.246905	NR_029381	ENSMUSG00000086822	5330413P13Rik	-	RIKEN cDNA 5330413P13 gene	ncRNA
chr16_51299903_51300311	chr16	51299904	51300311	+	1.37416	NA	Intergenic	Intergenic	-567334	NR_028300	68190	Mm.139089	NR_028300		5330426P16Rik	-	RIKEN cDNA 5330426P16 gene	ncRNA
chr16_51312892_51313337	chr16	51312893	51313337	+	1.17477	NA	Intergenic	Intergenic	-580342	NR_028300	68190	Mm.139089	NR_028300		5330426P16Rik	-	RIKEN cDNA 5330426P16 gene	ncRNA
chr16_51299042_51300311	chr16	51299043	51300311	+	0.826161	NA	Intergenic	MLT1E|LTR|ERVL-MaLR	-566904	NR_028300	68190	Mm.139089	NR_028300		5330426P16Rik	-	RIKEN cDNA 5330426P16 gene	ncRNA
chr16_50839572_50840077	chr16	50839573	50840077	+	0.813839	NA	Intergenic	RLTR17|LTR|ERVK	-107052	NR_028300	68190	Mm.139089	NR_028300		5330426P16Rik	-	RIKEN cDNA 5330426P16 gene	ncRNA
chr16_51316298_51316596	chr16	51316299	51316596	+	0.729556	NA	Intergenic	Intergenic	-583674	NR_028300	68190	Mm.139089	NR_028300		5330426P16Rik	-	RIKEN cDNA 5330426P16 gene	ncRNA
chr8_35881641_35882143	chr8	35881642	35882143	+	0.692709	NA	intron (NR_046181, intron 1 of 2)	intron (NR_046181, intron 1 of 2)	1065	NR_046181	330737	Mm.381743	NR_046181		5430403N17Rik	5430403N17	RIKEN cDNA 5430403N17 gene	ncRNA
chr2_156857462_156857726	chr2	156857463	156857726	+	0.619854	NA	intron (NR_015591, intron 1 of 2)	ID_B1|SINE|B4	5351	NR_015591	74487	Mm.490465	NR_015591	ENSMUSG00000085741	5430405H02Rik	2610307N17Rik	RIKEN cDNA 5430405H02 gene	ncRNA
chr8_25270533_25270822	chr8	25270534	25270822	+	0.680566	NA	Intergenic	Intergenic	35592	NR_040352	74489	Mm.256468	NR_040352		5430421F17Rik	-	RIKEN cDNA 5430421F17 gene	ncRNA
chrX_85873823_85874472	chrX	85873824	85874472	+	1.24416	NA	intron (NM_001163539, intron 1 of 1)	L1M2|LINE|L1	3875	NM_001163539	71398	Mm.185296	NM_001163539	ENSMUSG00000025058	5430427O19Rik	-	RIKEN cDNA 5430427O19 gene	protein-coding
chr1_131703486_131703841	chr1	131703487	131703841	+	1.00485	NA	intron (NM_145509, intron 4 of 5)	intron (NM_145509, intron 4 of 5)	14969	NM_145509	226421	Mm.44508	NM_145509	ENSMUSG00000052688	5430435G22Rik	Rab7b	RIKEN cDNA 5430435G22 gene	protein-coding
chr1_131703366_131703938	chr1	131703367	131703938	+	0.83694	NA	intron (NM_145509, intron 4 of 5)	intron (NM_145509, intron 4 of 5)	14957	NM_145509	226421	Mm.44508	NM_145509	ENSMUSG00000052688	5430435G22Rik	Rab7b	RIKEN cDNA 5430435G22 gene	protein-coding
chr1_131698835_131699223	chr1	131698836	131699223	+	0.786248	NA	intron (NM_145509, intron 4 of 5)	intron (NM_145509, intron 4 of 5)	10334	NM_145509	226421	Mm.44508	NM_145509	ENSMUSG00000052688	5430435G22Rik	Rab7b	RIKEN cDNA 5430435G22 gene	protein-coding
chr15_5758254_5759335	chr15	5758255	5759335	+	1.75121	NA	Intergenic	Intergenic	262477	NR_045274	71432	Mm.291087	NR_045274		5430437J10Rik	-	RIKEN cDNA 5430437J10 gene	ncRNA
chr15_5601929_5602730	chr15	5601930	5602730	+	1.39967	NA	Intergenic	Intergenic	106012	NR_045274	71432	Mm.291087	NR_045274		5430437J10Rik	-	RIKEN cDNA 5430437J10 gene	ncRNA
chr15_5432067_5432670	chr15	5432068	5432670	+	1.2919	NA	Intergenic	Intergenic	-63949	NR_045274	71432	Mm.291087	NR_045274		5430437J10Rik	-	RIKEN cDNA 5430437J10 gene	ncRNA
chr15_5446178_5447267	chr15	5446179	5447267	+	1.16725	NA	Intergenic	Intergenic	-49595	NR_045274	71432	Mm.291087	NR_045274		5430437J10Rik	-	RIKEN cDNA 5430437J10 gene	ncRNA
chr15_5431237_5431618	chr15	5431238	5431618	+	0.858835	NA	Intergenic	Intergenic	-64890	NR_045274	71432	Mm.291087	NR_045274		5430437J10Rik	-	RIKEN cDNA 5430437J10 gene	ncRNA
chr15_5513227_5513570	chr15	5513228	5513570	+	0.785194	NA	intron (NR_045274, intron 1 of 4)	intron (NR_045274, intron 1 of 4)	17081	NR_045274	71432	Mm.291087	NR_045274		5430437J10Rik	-	RIKEN cDNA 5430437J10 gene	ncRNA
chr15_5512579_5512832	chr15	5512580	5512832	+	0.752761	NA	intron (NR_045274, intron 1 of 4)	intron (NR_045274, intron 1 of 4)	16388	NR_045274	71432	Mm.291087	NR_045274		5430437J10Rik	-	RIKEN cDNA 5430437J10 gene	ncRNA
chr15_5507661_5507961	chr15	5507662	5507961	+	0.669641	NA	intron (NR_045274, intron 1 of 4)	intron (NR_045274, intron 1 of 4)	11493	NR_045274	71432	Mm.291087	NR_045274		5430437J10Rik	-	RIKEN cDNA 5430437J10 gene	ncRNA
chr15_5464682_5465066	chr15	5464683	5465066	+	0.611514	NA	Intergenic	Intergenic	-31444	NR_045274	71432	Mm.291087	NR_045274		5430437J10Rik	-	RIKEN cDNA 5430437J10 gene	ncRNA
chr4_44624276_44625355	chr4	44624277	44625355	+	1.0187	NA	intron (NM_008782, intron 6 of 9)	intron (NM_008782, intron 6 of 9)	-77984	NR_073462	70602	Mm.491142	NR_073462		5730488B01Rik	-	RIKEN cDNA 5730488B01 gene	ncRNA
chr3_127887514_127888272	chr3	127887515	127888272	+	0.979799	NA	intron (NM_027482, intron 1 of 1)	intron (NM_027482, intron 1 of 1)	8430	NM_027482	70617	Mm.317049	NM_027482	ENSMUSG00000050549	5730508B09Rik	2700063A17Rik|C80506	RIKEN cDNA 5730508B09 gene	protein-coding
chr3_127887565_127887963	chr3	127887566	127887963	+	0.94824	NA	intron (NM_027482, intron 1 of 1)	RSINE1|SINE|B4	8559	NM_027482	70617	Mm.317049	NM_027482	ENSMUSG00000050549	5730508B09Rik	2700063A17Rik|C80506	RIKEN cDNA 5730508B09 gene	protein-coding
chr3_127888013_127888259	chr3	127888014	127888259	+	0.834928	NA	intron (NM_027482, intron 1 of 1)	intron (NM_027482, intron 1 of 1)	8187	NM_027482	70617	Mm.317049	NM_027482	ENSMUSG00000050549	5730508B09Rik	2700063A17Rik|C80506	RIKEN cDNA 5730508B09 gene	protein-coding
chr3_127890986_127891316	chr3	127890987	127891316	+	0.704088	NA	intron (NM_027482, intron 1 of 1)	intron (NM_027482, intron 1 of 1)	5172	NM_027482	70617	Mm.317049	NM_027482	ENSMUSG00000050549	5730508B09Rik	2700063A17Rik|C80506	RIKEN cDNA 5730508B09 gene	protein-coding
chr3_127891979_127892255	chr3	127891980	127892255	+	0.645722	NA	intron (NM_027482, intron 1 of 1)	intron (NM_027482, intron 1 of 1)	4206	NM_027482	70617	Mm.317049	NM_027482	ENSMUSG00000050549	5730508B09Rik	2700063A17Rik|C80506	RIKEN cDNA 5730508B09 gene	protein-coding
chr19_53490940_53492434	chr19	53490941	53492434	+	1.09087	NA	Intergenic	Intergenic	-26891	NR_028427	381232	Mm.248624	NR_028427	ENSMUSG00000097636	5830416P10Rik	4833407H14Rik|5430437C04Rik|ENSMUSG00000074788|Gm10758	RIKEN cDNA 5830416P10 gene	ncRNA
chr19_53433888_53434603	chr19	53433889	53434603	+	0.786833	NA	Intergenic	Intergenic	30550	NR_028427	381232	Mm.248624	NR_028427	ENSMUSG00000097636	5830416P10Rik	4833407H14Rik|5430437C04Rik|ENSMUSG00000074788|Gm10758	RIKEN cDNA 5830416P10 gene	ncRNA
chr19_53454436_53454986	chr19	53454437	53454986	+	0.694005	NA	intron (NR_028427, intron 2 of 9)	intron (NR_028427, intron 2 of 9)	10085	NR_028427	381232	Mm.248624	NR_028427	ENSMUSG00000097636	5830416P10Rik	4833407H14Rik|5430437C04Rik|ENSMUSG00000074788|Gm10758	RIKEN cDNA 5830416P10 gene	ncRNA
chr12_69510718_69511429	chr12	69510719	69511429	+	1.17836	NA	Intergenic	Intergenic	-35524	NR_038061	76062	Mm.380755	NR_038060		5830428M24Rik	100040862|Gm3007	RIKEN cDNA 5830428M24 gene	ncRNA
chr12_69510718_69511246	chr12	69510719	69511246	+	1.17813	NA	Intergenic	ORR1B1|LTR|ERVL-MaLR	-35432	NR_038061	76062	Mm.380755	NR_038060		5830428M24Rik	100040862|Gm3007	RIKEN cDNA 5830428M24 gene	ncRNA
chr12_69456646_69456928	chr12	69456647	69456928	+	0.967589	NA	Intergenic	Intergenic	18763	NR_038060	76062	Mm.380755	NR_038060		5830428M24Rik	100040862|Gm3007	RIKEN cDNA 5830428M24 gene	ncRNA
chr12_69456596_69457010	chr12	69456597	69457010	+	0.940661	NA	Intergenic	Intergenic	18747	NR_038060	76062	Mm.380755	NR_038060		5830428M24Rik	100040862|Gm3007	RIKEN cDNA 5830428M24 gene	ncRNA
chr12_69437146_69437421	chr12	69437147	69437421	+	0.828771	NA	Intergenic	Intergenic	38266	NR_038060	76062	Mm.380755	NR_038060		5830428M24Rik	100040862|Gm3007	RIKEN cDNA 5830428M24 gene	ncRNA
chr12_69436725_69437434	chr12	69436726	69437434	+	0.679864	NA	Intergenic	Intergenic	38470	NR_038060	76062	Mm.380755	NR_038060		5830428M24Rik	100040862|Gm3007	RIKEN cDNA 5830428M24 gene	ncRNA
chr7_135644600_135644905	chr7	135644601	135644905	+	0.708378	NA	intron (NM_011212, intron 3 of 20)	RMER15|LTR|ERVL	7561	NR_015548	67765	Mm.445272	NR_015548	ENSMUSG00000097471	5830432E09Rik	-	RIKEN cDNA 5830432E09 gene	ncRNA
chr13_101229836_101230305	chr13	101229837	101230305	+	1.00566	NA	Intergenic	MLT1J1|LTR|ERVL-MaLR	-2056	NR_046158	328324	Mm.402274	NR_046158		5930438M14Rik	5930438M14	RIKEN cDNA 5930438M14 gene	ncRNA
chr13_101182413_101182821	chr13	101182414	101182821	+	0.894788	NA	Intergenic	Intergenic	-49510	NR_046158	328324	Mm.402274	NR_046158		5930438M14Rik	5930438M14	RIKEN cDNA 5930438M14 gene	ncRNA
chr1_73936671_73937008	chr1	73936672	73937008	+	1.03162	NA	intron (NM_027884, intron 22 of 34)	intron (NM_027884, intron 22 of 34)	-72374	NR_045311	109198	Mm.359721	NR_045311		6030407O03Rik	-	RIKEN cDNA 6030407O03 gene	ncRNA
chr1_73947285_73948343	chr1	73947286	73948343	+	0.980797	NA	intron (NM_001289895, intron 19 of 32)	L2|LINE|L2	-83348	NR_045311	109198	Mm.359721	NR_045311		6030407O03Rik	-	RIKEN cDNA 6030407O03 gene	ncRNA
chr1_73940474_73941226	chr1	73940475	73941226	+	0.916086	NA	intron (NM_001289895, intron 21 of 32)	intron (NM_001289895, intron 21 of 32)	-76384	NR_045311	109198	Mm.359721	NR_045311		6030407O03Rik	-	RIKEN cDNA 6030407O03 gene	ncRNA
chr1_73940890_73941158	chr1	73940891	73941158	+	0.911618	NA	exon (NM_027884, exon 21 of 35)	exon (NM_027884, exon 21 of 35)	-76558	NR_045311	109198	Mm.359721	NR_045311		6030407O03Rik	-	RIKEN cDNA 6030407O03 gene	ncRNA
chr1_73936663_73937131	chr1	73936664	73937131	+	0.885957	NA	intron (NM_027884, intron 22 of 34)	intron (NM_027884, intron 22 of 34)	-72431	NR_045311	109198	Mm.359721	NR_045311		6030407O03Rik	-	RIKEN cDNA 6030407O03 gene	ncRNA
chr1_73936644_73937437	chr1	73936645	73937437	+	0.618848	NA	intron (NM_027884, intron 22 of 34)	intron (NM_027884, intron 22 of 34)	-72575	NR_045311	109198	Mm.359721	NR_045311		6030407O03Rik	-	RIKEN cDNA 6030407O03 gene	ncRNA
chr3_129656600_129657588	chr3	129656601	129657588	+	1.20252	NA	Intergenic	RMER1B|Other|Other	-96664	NR_040589	319224	Mm.477035	NR_040589		6330410L21Rik	-	RIKEN cDNA 6330410L21 gene	ncRNA
chr7_139971467_139971867	chr7	139971468	139971867	+	1.03726	NA	TTS (NM_001033465)	TTS (NM_001033465)	7088	NM_001033465	381933	Mm.389985	NM_001033465	ENSMUSG00000073795	6430531B16Rik	Gm1093	RIKEN cDNA 6430531B16 gene	protein-coding
chr13_99410407_99411467	chr13	99410408	99411467	+	0.610967	NA	non-coding (NR_015515, exon 2 of 2)	non-coding (NR_015515, exon 2 of 2)	1889	NR_015515	320893	Mm.470842	NR_015515		6430562O15Rik	-	RIKEN cDNA 6430562O15 gene	ncRNA
chr8_36452742_36453412	chr8	36452743	36453412	+	1.01304	NA	Intergenic	Intergenic	-36114	NM_176952	319582	Mm.180924	NM_176952	ENSMUSG00000039620	6430573F11Rik	Kiaa1456	RIKEN cDNA 6430573F11 gene	protein-coding
chr2_72868177_72868731	chr2	72868178	72868731	+	1.61397	NA	Intergenic	LTR48|LTR|ERV1	-54737	NR_102349	76218	Mm.75260	NR_102348	ENSMUSG00000085427	6430710C18Rik	5033406J01Rik	RIKEN cDNA 6430710C18 gene	ncRNA
chr2_72867796_72868736	chr2	72867797	72868736	+	1.36213	NA	Intergenic	Intergenic	-54549	NR_102349	76218	Mm.75260	NR_102348	ENSMUSG00000085427	6430710C18Rik	5033406J01Rik	RIKEN cDNA 6430710C18 gene	ncRNA
chr2_72841255_72841843	chr2	72841256	72841843	+	1.31879	NA	Intergenic	Intergenic	-27832	NR_102349	76218	Mm.75260	NR_102348	ENSMUSG00000085427	6430710C18Rik	5033406J01Rik	RIKEN cDNA 6430710C18 gene	ncRNA
chr2_72865436_72865852	chr2	72865437	72865852	+	0.787949	NA	Intergenic	Intergenic	-51927	NR_102349	76218	Mm.75260	NR_102348	ENSMUSG00000085427	6430710C18Rik	5033406J01Rik	RIKEN cDNA 6430710C18 gene	ncRNA
chr2_11429569_11430049	chr2	11429570	11430049	+	1.34063	NA	Intergenic	Intergenic	-31309	NR_040615	77543	Mm.490670	NR_040615		8030442B05Rik	-	RIKEN cDNA 8030442B05 gene	ncRNA
chr18_77652513_77652904	chr18	77652514	77652904	+	1.06734	NA	intron (NM_178670, intron 3 of 4)	intron (NM_178670, intron 3 of 4)	61301	NM_178670	212163	Mm.23293	NM_178670	ENSMUSG00000047466	8030462N17Rik	Akd2|Ark2N	RIKEN cDNA 8030462N17 gene	protein-coding
chr18_77681714_77682004	chr18	77681715	77682004	+	0.718025	NA	intron (NM_178670, intron 1 of 4)	intron (NM_178670, intron 1 of 4)	32151	NM_178670	212163	Mm.23293	NM_178670	ENSMUSG00000047466	8030462N17Rik	Akd2|Ark2N	RIKEN cDNA 8030462N17 gene	protein-coding
chr11_3442587_3443651	chr11	3442588	3443651	+	0.811313	NA	intron (NM_145355, intron 1 of 7)	MIRb|SINE|MIR	-9318	NR_028317	71523	Mm.72795	NM_027820	ENSMUSG00000034587	8430429K09Rik	-	RIKEN cDNA 8430429K09 gene	ncRNA
chr11_3442645_3443049	chr11	3442646	3443049	+	0.734149	NA	intron (NM_145355, intron 1 of 7)	intron (NM_145355, intron 1 of 7)	-9590	NR_028317	71523	Mm.72795	NM_027820	ENSMUSG00000034587	8430429K09Rik	-	RIKEN cDNA 8430429K09 gene	ncRNA
chr19_31321787_31322198	chr19	31321788	31322198	+	0.837129	NA	intron (NM_001013833, intron 2 of 17)	intron (NM_001013833, intron 2 of 17)	-105597	NR_002849	78103	Mm.445198	NR_002849		8430431K14Rik	-	RIKEN cDNA 8430431K14 gene	ncRNA
chr4_7689479_7689918	chr4	7689480	7689918	+	1.2939	NA	Intergenic	Intergenic	129011	NR_040645	71510	Mm.410775	NR_040645	ENSMUSG00000086070	8430436N08Rik	-	RIKEN cDNA 8430436N08 gene	ncRNA
chr4_7490890_7491176	chr4	7490891	7491176	+	0.69393	NA	Intergenic	Intergenic	-69655	NR_040645	71510	Mm.410775	NR_040645	ENSMUSG00000086070	8430436N08Rik	-	RIKEN cDNA 8430436N08 gene	ncRNA
chr2_72729184_72729703	chr2	72729185	72729703	+	0.899817	NA	TTS (NR_040503)	TTS (NR_040503)	25934	NR_040503	74541	Mm.410774	NR_040503	ENSMUSG00000085252	8430437L04Rik	-	RIKEN cDNA 8430437L04 gene	ncRNA
chr2_35881907_35882277	chr2	35881908	35882277	+	0.69119	NA	intron (NM_029774, intron 6 of 9)	intron (NM_029774, intron 6 of 9)	62902	NR_040618	77665	Mm.400558	NR_040618	ENSMUSG00000086449	9030204H09Rik	-	RIKEN cDNA 9030204H09 gene	ncRNA
chr16_30024500_30025297	chr16	30024501	30025297	+	0.768737	NA	intron (NR_045878, intron 3 of 3)	intron (NR_045878, intron 3 of 3)	14580	NR_045878	71528	Mm.297640	NR_045878		9030404E10Rik	-	RIKEN cDNA 9030404E10 gene	ncRNA
chr16_30024651_30024985	chr16	30024652	30024985	+	0.753935	NA	intron (NR_045878, intron 3 of 3)	intron (NR_045878, intron 3 of 3)	14661	NR_045878	71528	Mm.297640	NR_045878		9030404E10Rik	-	RIKEN cDNA 9030404E10 gene	ncRNA
chr16_30024647_30025139	chr16	30024648	30025139	+	0.733595	NA	intron (NR_045878, intron 3 of 3)	intron (NR_045878, intron 3 of 3)	14586	NR_045878	71528	Mm.297640	NR_045878		9030404E10Rik	-	RIKEN cDNA 9030404E10 gene	ncRNA
chr12_35640856_35641416	chr12	35640857	35641416	+	1.20116	NA	Intergenic	MIR3|SINE|MIR	45168	NR_045051	71581	Mm.100110	NR_045050		9130015A21Rik	-	RIKEN cDNA 9130015A21 gene	ncRNA
chr12_35712607_35713115	chr12	35712608	35713115	+	0.862251	NA	Intergenic	Intergenic	-17743	NR_045050	71581	Mm.100110	NR_045050		9130015A21Rik	-	RIKEN cDNA 9130015A21 gene	ncRNA
chr12_35687584_35688062	chr12	35687585	35688062	+	0.786786	NA	intron (NR_045050, intron 3 of 4)	intron (NR_045050, intron 3 of 4)	-1519	NR_045051	71581	Mm.100110	NR_045050		9130015A21Rik	-	RIKEN cDNA 9130015A21 gene	ncRNA
chr6_72056505_72057091	chr6	72056506	72057091	+	1.04372	NA	Intergenic	Intergenic	-14270	NR_046180	330350	Mm.246787	NR_046180		9130221F21Rik	9130221F21	RIKEN cDNA 9130221F21 gene	ncRNA
chr5_65991155_65991628	chr5	65991156	65991628	+	0.826697	NA	intron (NR_027961, intron 4 of 6)	ORR1B1|LTR|ERVL-MaLR	12893	NR_027961	231253	Mm.436542	NM_177679	ENSMUSG00000054598	9130230L23Rik	-	RIKEN cDNA 9130230L23 gene	ncRNA
chr5_65986457_65986874	chr5	65986458	65986874	+	0.808242	NA	Intergenic	Lx8|LINE|L1	17619	NR_027961	231253	Mm.436542	NM_177679	ENSMUSG00000054598	9130230L23Rik	-	RIKEN cDNA 9130230L23 gene	ncRNA
chr13_81169982_81170668	chr13	81169983	81170668	+	1.29831	NA	intron (NM_054053, intron 86 of 89)	intron (NM_054053, intron 86 of 89)	206251	NR_015587	319983	Mm.343027	NR_015587	ENSMUSG00000097098	9330111N05Rik	-	RIKEN cDNA 9330111N05 gene	ncRNA
chr13_81175439_81175781	chr13	81175440	81175781	+	0.80832	NA	intron (NM_054053, intron 86 of 89)	intron (NM_054053, intron 86 of 89)	211536	NR_015587	319983	Mm.343027	NR_015587	ENSMUSG00000097098	9330111N05Rik	-	RIKEN cDNA 9330111N05 gene	ncRNA
chr10_29253828_29254188	chr10	29253829	29254188	+	0.657105	NA	Intergenic	ORR1D1|LTR|ERVL-MaLR	42365	NM_001162537	212448	Mm.132789	NM_001162537	ENSMUSG00000004360	9330159F19Rik	-	RIKEN cDNA 9330159F19 gene	protein-coding
chr8_94447136_94448081	chr8	94447137	94448081	+	1.14655	NA	Intergenic	Intergenic	-12506	NR_015514	320377	Mm.486022	NR_015514	ENSMUSG00000097194	9330175E14Rik	A630085K21	RIKEN cDNA 9330175E14 gene	ncRNA
chr8_94437001_94437282	chr8	94437002	94437282	+	1.1032	NA	Intergenic	Intergenic	-2039	NR_015514	320377	Mm.486022	NR_015514	ENSMUSG00000097194	9330175E14Rik	A630085K21	RIKEN cDNA 9330175E14 gene	ncRNA
chr8_94441616_94442044	chr8	94441617	94442044	+	0.865194	NA	Intergenic	MER113|DNA|hAT-Charlie	-6727	NR_015514	320377	Mm.486022	NR_015514	ENSMUSG00000097194	9330175E14Rik	A630085K21	RIKEN cDNA 9330175E14 gene	ncRNA
chr6_127143104_127143767	chr6	127143105	127143767	+	0.864525	NA	intron (NM_009829, intron 3 of 4)	intron (NM_009829, intron 3 of 4)	-5953	NR_040274	77558	Mm.358918	NR_040273	ENSMUSG00000097166	9330179D12Rik	-	RIKEN cDNA 9330179D12 gene	ncRNA
chr6_127149559_127150063	chr6	127149560	127150063	+	0.611568	NA	non-coding (NR_040275, exon 1 of 2)	non-coding (NR_040275, exon 1 of 2)	185	NR_040273	77558	Mm.358918	NR_040273	ENSMUSG00000097166	9330179D12Rik	-	RIKEN cDNA 9330179D12 gene	ncRNA
chr2_158354397_158354661	chr2	158354398	158354661	+	0.754451	NA	non-coding (NR_015463, exon 6 of 6)	non-coding (NR_015463, exon 6 of 6)	6980	NR_015463	68108	Mm.119198	NR_015463		9430008C03Rik	-	RIKEN cDNA 9430008C03 gene	ncRNA
chr15_93948969_93949262	chr15	93948970	93949262	+	0.653816	NA	Intergenic	Intergenic	-22005	NR_045737	77248	Mm.410768	NR_045737		9430014N10Rik	-	RIKEN cDNA 9430014N10 gene	ncRNA
chr6_43382827_43383328	chr6	43382828	43383328	+	1.36714	NA	intron (NM_013861, intron 8 of 8)	intron (NM_013861, intron 8 of 8)	-59351	NR_045988	319812	Mm.446393	NR_045988		9430018G01Rik	-	RIKEN cDNA 9430018G01 gene	ncRNA
chr6_43420166_43420889	chr6	43420167	43420889	+	1.1553	NA	intron (NM_013861, intron 8 of 8)	intron (NM_013861, intron 8 of 8)	-21901	NR_045988	319812	Mm.446393	NR_045988		9430018G01Rik	-	RIKEN cDNA 9430018G01 gene	ncRNA
chr6_43382294_43382656	chr6	43382295	43382656	+	0.953025	NA	intron (NM_013861, intron 8 of 8)	ORR1D1|LTR|ERVL-MaLR	-59954	NR_045988	319812	Mm.446393	NR_045988		9430018G01Rik	-	RIKEN cDNA 9430018G01 gene	ncRNA
chr2_75286348_75286730	chr2	75286349	75286730	+	1.07087	NA	Intergenic	Intergenic	157640	NR_040635	77269	Mm.389278	NR_040635		9430019J16Rik	-	RIKEN cDNA 9430019J16 gene	ncRNA
chr2_75285000_75285552	chr2	75285001	75285552	+	0.817378	NA	Intergenic	Intergenic	158903	NR_040635	77269	Mm.389278	NR_040635		9430019J16Rik	-	RIKEN cDNA 9430019J16 gene	ncRNA
chr2_75547925_75548231	chr2	75547926	75548231	+	0.626467	NA	Intergenic	Intergenic	-103899	NR_040635	77269	Mm.389278	NR_040635		9430019J16Rik	-	RIKEN cDNA 9430019J16 gene	ncRNA
chr15_34336208_34336742	chr15	34336209	34336742	+	0.791489	NA	intron (NM_016762, intron 2 of 18)	intron (NM_016762, intron 2 of 18)	21397	NM_001256161	77358	Mm.402759	NM_001256161		9430069I07Rik	-	RIKEN cDNA 9430069I07 gene	protein-coding
chr13_50958063_50958745	chr13	50958064	50958745	+	0.843102	NA	Intergenic	Intergenic	142323	NR_029463	77428	Mm.405630	NR_029463		9430083A17Rik	-	RIKEN cDNA 9430083A17 gene	ncRNA
chr1_61423253_61423697	chr1	61423254	61423697	+	0.74355	NA	Intergenic	Intergenic	45043	NR_040483	77341	Mm.402964	NR_040483	ENSMUSG00000085447	9530026F06Rik	-	RIKEN cDNA 9530026F06 gene	ncRNA
chr1_61423307_61423620	chr1	61423308	61423620	+	0.711123	NA	Intergenic	Intergenic	45032	NR_040483	77341	Mm.402964	NR_040483	ENSMUSG00000085447	9530026F06Rik	-	RIKEN cDNA 9530026F06 gene	ncRNA
chr5_28397404_28397680	chr5	28397405	28397680	+	0.608943	NA	intron (NM_028234, intron 15 of 18)	intron (NM_028234, intron 15 of 18)	-69442	NR_015562	654796	Mm.57202	NR_015562	ENSMUSG00000097726	9530036O11Rik	-	RIKEN cDNA 9530036O11Rik	ncRNA
chr8_10993545_10994256	chr8	10993546	10994256	+	1.44615	NA	intron (NM_001081212, intron 1 of 1)	intron (NM_001081212, intron 1 of 1)	-13949	NR_046017	619321	Mm.403007	NR_046017	ENSMUSG00000096938	9530052E02Rik	-	RIKEN cDNA 9530052E02 gene	ncRNA
chr8_10995800_10996123	chr8	10995801	10996123	+	1.00311	NA	intron (NM_001081212, intron 1 of 1)	intron (NM_001081212, intron 1 of 1)	-11888	NR_046017	619321	Mm.403007	NR_046017	ENSMUSG00000096938	9530052E02Rik	-	RIKEN cDNA 9530052E02 gene	ncRNA
chr9_122525870_122526092	chr9	122525871	122526092	+	0.686191	NA	Intergenic	MER121|DNA|TcMar?	-46520	NR_015610	319626	Mm.186748	NR_015610	ENSMUSG00000097736	9530059O14Rik	-	RIKEN cDNA 9530059O14 gene	ncRNA
chr9_22429033_22429324	chr9	22429034	22429324	+	0.901619	NA	intron (NM_026739, intron 2 of 6)	B3|SINE|B2	17602	NM_026739	68283	Mm.280669	NM_026739	ENSMUSG00000036411	9530077C05Rik	1110003N12Rik|Kiaa0895|mKIAA0895	RIKEN cDNA 9530077C05 gene	protein-coding
chr9_22428900_22429316	chr9	22428901	22429316	+	0.898723	NA	intron (NM_026739, intron 2 of 6)	B3|SINE|B2	17531	NM_026739	68283	Mm.280669	NM_026739	ENSMUSG00000036411	9530077C05Rik	1110003N12Rik|Kiaa0895|mKIAA0895	RIKEN cDNA 9530077C05 gene	protein-coding
chr9_69025905_69026571	chr9	69025906	69026571	+	1.54551	NA	intron (NM_013646, intron 1 of 10)	intron (NM_013646, intron 1 of 10)	260892	NR_033299	320440	Mm.483129	NM_177159		9530091C08Rik	-	RIKEN cDNA 9530091C08 gene	ncRNA
chr9_68970150_68970513	chr9	68970151	68970513	+	0.683325	NA	intron (NM_013646, intron 1 of 10)	MER119|DNA|hAT-Charlie	204986	NR_033299	320440	Mm.483129	NM_177159		9530091C08Rik	-	RIKEN cDNA 9530091C08 gene	ncRNA
chr3_127914017_127914621	chr3	127914018	127914621	+	0.8796	NA	Intergenic	Intergenic	-1852	NR_040552	329753	Mm.119720	NR_040552		9830132P13Rik	9830132P13	RIKEN cDNA 9830132P13 gene	ncRNA
chr3_127932079_127932888	chr3	127932080	127932888	+	0.803251	NA	intron (NR_040552, intron 3 of 4)	intron (NR_040552, intron 3 of 4)	16313	NR_040552	329753	Mm.119720	NR_040552		9830132P13Rik	9830132P13	RIKEN cDNA 9830132P13 gene	ncRNA
chr15_60739387_60740188	chr15	60739388	60740188	+	0.93122	NA	Intergenic	Intergenic	-83177	NR_030696	320469	Mm.230853	NM_177166	ENSMUSG00000097493	9930014A18Rik	-	RIKEN cDNA 9930014A18 gene	ncRNA
chr2_155038331_155038724	chr2	155038332	155038724	+	0.912697	NA	intron (NM_015770, intron 1 of 3)	intron (NM_015770, intron 1 of 3)	24958	NM_015770	50518	Mm.315593	NM_015770	ENSMUSG00000027596	a	A<y>|ASIP|ASP|As	nonagouti	protein-coding
chr1_193178701_193179230	chr1	193178702	193179230	+	1.00491	NA	intron (NM_153137, intron 14 of 15)	intron (NM_153137, intron 14 of 15)	5389	NM_181048	319266	Mm.482460	NM_181048	ENSMUSG00000079144	A130010J15Rik	-	RIKEN cDNA A130010J15 gene	protein-coding
chr10_122603947_122604319	chr10	122603948	122604319	+	0.666265	NA	Intergenic	Intergenic	-34242	NR_040616	319272	Mm.411763	NR_040616		A130077B15Rik	-	RIKEN cDNA A130077B15 gene	ncRNA
chr16_24952851_24953349	chr16	24952852	24953349	+	1.10835	NA	intron (NM_001145952, intron 9 of 11)	intron (NM_001145952, intron 9 of 11)	-106539	NR_040374	319487	Mm.137341	NR_040374	ENSMUSG00000096960	A230028O05Rik	-	RIKEN cDNA A230028O05 gene	ncRNA
chr16_24952689_24953363	chr16	24952690	24953363	+	1.02132	NA	intron (NM_001145952, intron 9 of 11)	intron (NM_001145952, intron 9 of 11)	-106613	NR_040374	319487	Mm.137341	NR_040374	ENSMUSG00000096960	A230028O05Rik	-	RIKEN cDNA A230028O05 gene	ncRNA
chr9_20869311_20869731	chr9	20869312	20869731	+	0.662514	NA	intron (NM_175687, intron 2 of 7)	intron (NM_175687, intron 2 of 7)	879	NM_175687	319278	Mm.249932	NM_175687	ENSMUSG00000038884	A230050P20Rik	-	RIKEN cDNA A230050P20 gene	protein-coding
chr14_122074278_122074627	chr14	122074279	122074627	+	0.816035	NA	Intergenic	Intergenic	32521	NR_015586	319727	Mm.215552	NR_015586		A330035P11Rik	-	RIKEN cDNA A330035P11 gene	ncRNA
chr2_91242487_91243251	chr2	91242488	91243251	+	1.20037	NA	Intergenic	Intergenic	5723	NR_015464	606735	Mm.246808	NR_015464	ENSMUSG00000097868	A330069E16Rik	-	RIKEN cDNA A330069E16 gene	ncRNA
chr2_91242423_91242991	chr2	91242424	91242991	+	1.19682	NA	Intergenic	Intergenic	5561	NR_015464	606735	Mm.246808	NR_015464	ENSMUSG00000097868	A330069E16Rik	-	RIKEN cDNA A330069E16 gene	ncRNA
chr2_91242338_91243729	chr2	91242339	91243729	+	1.05144	NA	Intergenic	(GA)n|Simple_repeat|Simple_repeat	5888	NR_015464	606735	Mm.246808	NR_015464	ENSMUSG00000097868	A330069E16Rik	-	RIKEN cDNA A330069E16 gene	ncRNA
chr8_120332435_120333187	chr8	120332436	120333187	+	1.1811	NA	Intergenic	Intergenic	-104581	NR_110496	434353	Mm.411793	NR_110496		A330074K22Rik	-	RIKEN cDNA A330074K22 gene	ncRNA
chr8_120225681_120226134	chr8	120225682	120226134	+	0.864473	NA	intron (NR_110496, intron 1 of 2)	intron (NR_110496, intron 1 of 2)	2322	NR_110496	434353	Mm.411793	NR_110496		A330074K22Rik	-	RIKEN cDNA A330074K22 gene	ncRNA
chr8_120228100_120228542	chr8	120228101	120228542	+	0.6768	NA	promoter-TSS (NR_110496)	promoter-TSS (NR_110496)	-91	NR_110496	434353	Mm.411793	NR_110496		A330074K22Rik	-	RIKEN cDNA A330074K22 gene	ncRNA
chr13_44320849_44321676	chr13	44320850	44321676	+	1.43678	NA	Intergenic	Intergenic	-104776	NR_045088	100503592	Mm.184925	NR_045088		A330076C08Rik	-	RIKEN cDNA A330076C08 gene	ncRNA
chr13_113976469_113976823	chr13	113976470	113976823	+	0.712554	NA	intron (NM_172595, intron 4 of 4)	intron (NM_172595, intron 4 of 4)	174946	NR_045836	319803	Mm.386896	NM_177004		A430090L17Rik	-	RIKEN cDNA A430090L17 gene	ncRNA
chr19_10781547_10782042	chr19	10781548	10782042	+	1.17163	NA	non-coding (NR_027805, exon 2 of 4)	non-coding (NR_027805, exon 2 of 4)	40848	NR_027805	403202	Mm.34482	NM_207529	ENSMUSG00000067577	A430093F15Rik	Gm674	RIKEN cDNA A430093F15 gene	ncRNA
chr19_10757076_10757610	chr19	10757077	10757610	+	0.875884	NA	intron (NR_027805, intron 1 of 3)	intron (NR_027805, intron 1 of 3)	16396	NR_027805	403202	Mm.34482	NM_207529	ENSMUSG00000067577	A430093F15Rik	Gm674	RIKEN cDNA A430093F15 gene	ncRNA
chr19_10757066_10757998	chr19	10757067	10757998	+	0.834278	NA	intron (NR_027805, intron 1 of 3)	intron (NR_027805, intron 1 of 3)	16585	NR_027805	403202	Mm.34482	NM_207529	ENSMUSG00000067577	A430093F15Rik	Gm674	RIKEN cDNA A430093F15 gene	ncRNA
chr19_10763325_10764423	chr19	10763326	10764423	+	0.778823	NA	intron (NR_027805, intron 1 of 3)	intron (NR_027805, intron 1 of 3)	22927	NR_027805	403202	Mm.34482	NM_207529	ENSMUSG00000067577	A430093F15Rik	Gm674	RIKEN cDNA A430093F15 gene	ncRNA
chr19_10739979_10740219	chr19	10739980	10740219	+	0.755821	NA	promoter-TSS (NR_027805)	promoter-TSS (NR_027805)	-848	NR_027805	403202	Mm.34482	NM_207529	ENSMUSG00000067577	A430093F15Rik	Gm674	RIKEN cDNA A430093F15 gene	ncRNA
chr19_10763340_10764127	chr19	10763341	10764127	+	0.738396	NA	intron (NR_027805, intron 1 of 3)	intron (NR_027805, intron 1 of 3)	22787	NR_027805	403202	Mm.34482	NM_207529	ENSMUSG00000067577	A430093F15Rik	Gm674	RIKEN cDNA A430093F15 gene	ncRNA
chr19_10783951_10784605	chr19	10783952	10784605	+	0.720323	NA	intron (NR_027805, intron 2 of 3)	intron (NR_027805, intron 2 of 3)	43331	NR_027805	403202	Mm.34482	NM_207529	ENSMUSG00000067577	A430093F15Rik	Gm674	RIKEN cDNA A430093F15 gene	ncRNA
chr19_10763588_10764097	chr19	10763589	10764097	+	0.670509	NA	intron (NR_027805, intron 1 of 3)	intron (NR_027805, intron 1 of 3)	22896	NR_027805	403202	Mm.34482	NM_207529	ENSMUSG00000067577	A430093F15Rik	Gm674	RIKEN cDNA A430093F15 gene	ncRNA
chr14_53943341_53943740	chr14	53943342	53943740	+	1.35249	NA	Intergenic	Intergenic	277601	NM_001205242	100568452	Mm.213248	NM_001205242		A430107P09Rik	Va10	RIKEN cDNA A430107P09 gene	protein-coding
chr14_53736269_53736722	chr14	53736270	53736722	+	1.03253	NA	Intergenic	Intergenic	70556	NM_001205242	100568452	Mm.213248	NM_001205242		A430107P09Rik	Va10	RIKEN cDNA A430107P09 gene	protein-coding
chr14_53643640_53644414	chr14	53643641	53644414	+	0.953182	NA	Intergenic	LTRIS2|LTR|ERV1	-21913	NM_001205242	100568452	Mm.213248	NM_001205242		A430107P09Rik	Va10	RIKEN cDNA A430107P09 gene	protein-coding
chr14_53832040_53832501	chr14	53832041	53832501	+	0.905968	NA	Intergenic	Intergenic	166331	NM_001205242	100568452	Mm.213248	NM_001205242		A430107P09Rik	Va10	RIKEN cDNA A430107P09 gene	protein-coding
chr14_53559955_53560589	chr14	53559956	53560589	+	0.713986	NA	Intergenic	Intergenic	-105668	NM_001205242	100568452	Mm.213248	NM_001205242		A430107P09Rik	Va10	RIKEN cDNA A430107P09 gene	protein-coding
chr13_15848032_15848464	chr13	15848033	15848464	+	0.997741	NA	Intergenic	Intergenic	41005	NR_046131	328190	Mm.446957	NR_046131		A530046M15Rik	A530046M15	RIKEN cDNA A530046M15 gene	ncRNA
chr18_61481577_61482048	chr18	61481578	61482048	+	1.07359	NA	intron (NR_045419, intron 1 of 3)	MLT1K|LTR|ERVL-MaLR	2794	NR_045419	442846	Mm.417648	NR_045419		A530050N04Rik	-	RIKEN cDNA A530050N04 gene	ncRNA
chr4_16211422_16211941	chr4	16211423	16211941	+	1.30545	NA	intron (NR_045765, intron 3 of 6)	Lx7|LINE|L1	47572	NR_045765	100415915	Mm.387180	NR_045765	ENSMUSG00000085112	A530072M11Rik	-	RIKEN cDNA gene A530072M11	ncRNA
chr1_85706082_85706446	chr1	85706083	85706446	+	0.851656	NA	intron (NM_013673, intron 17 of 19)	MTD|LTR|ERVL-MaLR	30342	NM_177055	319997	Mm.116691	NM_177055	ENSMUSG00000052760	A630001G21Rik	-	RIKEN cDNA A630001G21 gene	protein-coding
chr13_93092942_93093254	chr13	93092943	93093254	+	0.879985	NA	exon (NM_023821, exon 2 of 13)	exon (NM_023821, exon 2 of 13)	-1735	NR_046182	408254	Mm.474857	NR_046182		A630019I02Rik	-	RIKEN cDNA A630019I02 gene	ncRNA
chr5_20929880_20930384	chr5	20929881	20930384	+	0.78552	NA	intron (NM_001080977, intron 1 of 7)	B1_Mur2|SINE|Alu	-20857	NR_030699	320770	Mm.491217	NR_030699		A630072M18Rik	-	RIKEN cDNA A630072M18 gene	ncRNA
chr6_61225361_61226006	chr6	61225362	61226006	+	1.71113	NA	intron (NM_183310, intron 1 of 10)	intron (NM_183310, intron 1 of 10)	-44874	NR_040287	100504262	Mm.438066	NR_040287		A730020E08Rik	-	RIKEN cDNA A730020E08 gene	ncRNA
chr6_61266504_61266875	chr6	61266505	61266875	+	1.06326	NA	intron (NM_183310, intron 1 of 10)	intron (NM_183310, intron 1 of 10)	-85880	NR_040287	100504262	Mm.438066	NR_040287		A730020E08Rik	-	RIKEN cDNA A730020E08 gene	ncRNA
chr6_61266326_61266888	chr6	61266327	61266888	+	0.993253	NA	intron (NM_183310, intron 1 of 10)	intron (NM_183310, intron 1 of 10)	-85797	NR_040287	100504262	Mm.438066	NR_040287		A730020E08Rik	-	RIKEN cDNA A730020E08 gene	ncRNA
chr6_62014364_62014963	chr6	62014365	62014963	+	0.824473	NA	intron (NM_183310, intron 10 of 10)	intron (NM_183310, intron 10 of 10)	-833854	NR_040287	100504262	Mm.438066	NR_040287		A730020E08Rik	-	RIKEN cDNA A730020E08 gene	ncRNA
chr6_61263257_61263874	chr6	61263258	61263874	+	0.757874	NA	intron (NM_183310, intron 1 of 10)	intron (NM_183310, intron 1 of 10)	-82756	NR_040287	100504262	Mm.438066	NR_040287		A730020E08Rik	-	RIKEN cDNA A730020E08 gene	ncRNA
chr6_61430715_61430967	chr6	61430716	61430967	+	0.718443	NA	intron (NM_183310, intron 5 of 10)	intron (NM_183310, intron 5 of 10)	-250031	NR_040287	100504262	Mm.438066	NR_040287		A730020E08Rik	-	RIKEN cDNA A730020E08 gene	ncRNA
chr6_61430689_61431088	chr6	61430690	61431088	+	0.708091	NA	intron (NM_183310, intron 5 of 10)	intron (NM_183310, intron 5 of 10)	-250079	NR_040287	100504262	Mm.438066	NR_040287		A730020E08Rik	-	RIKEN cDNA A730020E08 gene	ncRNA
chr6_61300631_61301375	chr6	61300632	61301375	+	0.603712	NA	intron (NM_183310, intron 1 of 10)	intron (NM_183310, intron 1 of 10)	-120193	NR_040287	100504262	Mm.438066	NR_040287		A730020E08Rik	-	RIKEN cDNA A730020E08 gene	ncRNA
chr3_121592911_121594042	chr3	121592912	121594042	+	0.999761	NA	Intergenic	Intergenic	50008	NR_036456	100503044	Mm.65320	NM_176992	ENSMUSG00000044522	A730020M07Rik	-	RIKEN cDNA A730020M07 gene	ncRNA
chr9_62222115_62222901	chr9	62222116	62222901	+	0.800918	NA	Intergenic	Intergenic	21592	NR_040769	330958	Mm.411888	NR_040769		A730043L09Rik	A730043L09	RIKEN cDNA A730043L09 gene	ncRNA
chr9_62222449_62222888	chr9	62222450	62222888	+	0.79057	NA	Intergenic	Intergenic	21431	NR_040769	330958	Mm.411888	NR_040769		A730043L09Rik	A730043L09	RIKEN cDNA A730043L09 gene	ncRNA
chr3_65319321_65320108	chr3	65319322	65320108	+	0.766451	NA	intron (NM_001289450, intron 9 of 14)	CT-rich|Low_complexity|Low_complexity	29714	NR_040390	319798	Mm.445698	NR_040390		A730090N16Rik	-	RIKEN cDNA A730090N16 gene	ncRNA
chr16_24506624_24507275	chr16	24506625	24507275	+	1.51152	NA	intron (NM_001145952, intron 2 of 11)	intron (NM_001145952, intron 2 of 11)	-22364	NR_038091	624582	Mm.439775	NR_038091		A730098P11Rik	-	mortality factor 4 like 1 pseudogene	pseudo
chr16_24506314_24507276	chr16	24506315	24507276	+	1.4407	NA	intron (NM_001145952, intron 2 of 11)	intron (NM_001145952, intron 2 of 11)	-22519	NR_038091	624582	Mm.439775	NR_038091		A730098P11Rik	-	mortality factor 4 like 1 pseudogene	pseudo
chr16_24507905_24508233	chr16	24507906	24508233	+	1.10727	NA	intron (NM_001145952, intron 2 of 11)	intron (NM_001145952, intron 2 of 11)	-21245	NR_038091	624582	Mm.439775	NR_038091		A730098P11Rik	-	mortality factor 4 like 1 pseudogene	pseudo
chr16_24526753_24528066	chr16	24526754	24528066	+	0.992391	NA	intron (NM_001145952, intron 2 of 11)	intron (NM_001145952, intron 2 of 11)	-1904	NR_038091	624582	Mm.439775	NR_038091		A730098P11Rik	-	mortality factor 4 like 1 pseudogene	pseudo
chr16_24594499_24594960	chr16	24594500	24594960	+	0.842692	NA	intron (NM_001145952, intron 3 of 11)	intron (NM_001145952, intron 3 of 11)	65416	NR_038091	624582	Mm.439775	NR_038091		A730098P11Rik	-	mortality factor 4 like 1 pseudogene	pseudo
chr16_24594246_24594960	chr16	24594247	24594960	+	0.834634	NA	intron (NM_001145952, intron 3 of 11)	intron (NM_001145952, intron 3 of 11)	65289	NR_038091	624582	Mm.439775	NR_038091		A730098P11Rik	-	mortality factor 4 like 1 pseudogene	pseudo
chr16_24603176_24603751	chr16	24603177	24603751	+	0.685744	NA	intron (NM_001145952, intron 3 of 11)	intron (NM_001145952, intron 3 of 11)	74150	NR_038091	624582	Mm.439775	NR_038091		A730098P11Rik	-	mortality factor 4 like 1 pseudogene	pseudo
chr16_24608506_24609027	chr16	24608507	24609027	+	0.677592	NA	intron (NM_001145952, intron 4 of 11)	intron (NM_001145952, intron 4 of 11)	79453	NR_038091	624582	Mm.439775	NR_038091		A730098P11Rik	-	mortality factor 4 like 1 pseudogene	pseudo
chr16_24608501_24608766	chr16	24608502	24608766	+	0.621162	NA	intron (NM_001145952, intron 4 of 11)	intron (NM_001145952, intron 4 of 11)	79320	NR_038091	624582	Mm.439775	NR_038091		A730098P11Rik	-	mortality factor 4 like 1 pseudogene	pseudo
chr13_78161914_78162500	chr13	78161915	78162500	+	0.858185	NA	intron (NR_028109, intron 10 of 10)	intron (NR_028109, intron 10 of 10)	-35810	NR_045195	320174	Mm.393122	NR_045195		A830082K12Rik	-	RIKEN cDNA A830082K12 gene	ncRNA
chr3_15139528_15139929	chr3	15139529	15139929	+	1.42955	NA	Intergenic	Intergenic	168528	NR_040550	77127	Mm.195792	NR_040549	ENSMUSG00000098008	A930001A20Rik	-	RIKEN cDNA A930001A20 gene	ncRNA
chr3_115858534_115859253	chr3	115858535	115859253	+	1.03767	NA	Intergenic	RLTR30B_MM|LTR|ERV1	29165	NR_027894	68161	Mm.392043	NR_015487		A930005H10Rik	-	RIKEN cDNA A930005H10 gene	ncRNA
chr3_115857750_115858282	chr3	115857751	115858282	+	1.02382	NA	Intergenic	Intergenic	30043	NR_027894	68161	Mm.392043	NR_015487		A930005H10Rik	-	RIKEN cDNA A930005H10 gene	ncRNA
chr3_115857603_115858461	chr3	115857604	115858461	+	0.97766	NA	Intergenic	Intergenic	30027	NR_027894	68161	Mm.392043	NR_015487		A930005H10Rik	-	RIKEN cDNA A930005H10 gene	ncRNA
chr3_115861077_115861320	chr3	115861078	115861320	+	0.756187	NA	Intergenic	RMER6C|LTR|ERVK	26860	NR_027894	68161	Mm.392043	NR_015487		A930005H10Rik	-	RIKEN cDNA A930005H10 gene	ncRNA
chr16_91459786_91460215	chr16	91459787	91460215	+	0.908414	NA	Intergenic	Intergenic	-5103	NR_077219	100503120	Mm.387130	NR_077219	ENSMUSG00000084866	A930006K02Rik	-	RIKEN cDNA A930006K02 gene	ncRNA
chr16_91444917_91445118	chr16	91444918	91445118	+	0.807579	NA	Intergenic	Intergenic	-20086	NR_077219	100503120	Mm.387130	NR_077219	ENSMUSG00000084866	A930006K02Rik	-	RIKEN cDNA A930006K02 gene	ncRNA
chr16_91459472_91459739	chr16	91459473	91459739	+	0.634228	NA	Intergenic	B3|SINE|B2	-5498	NR_077219	100503120	Mm.387130	NR_077219	ENSMUSG00000084866	A930006K02Rik	-	RIKEN cDNA A930006K02 gene	ncRNA
chr19_29477017_29477548	chr19	29477018	29477548	+	1.73939	NA	Intergenic	Intergenic	44704	NR_015567	77779	Mm.458738	NR_015567	ENSMUSG00000097855	A930007I19Rik	-	RIKEN cDNA A930007I19 gene	ncRNA
chr19_29518965_29519303	chr19	29518966	29519303	+	1.15461	NA	intron (NR_015567, intron 2 of 3)	intron (NR_015567, intron 2 of 3)	2853	NR_015567	77779	Mm.458738	NR_015567	ENSMUSG00000097855	A930007I19Rik	-	RIKEN cDNA A930007I19 gene	ncRNA
chr17_35998637_35998860	chr17	35998638	35998860	+	0.979624	NA	intron (NR_015618, intron 1 of 1)	intron (NR_015618, intron 1 of 1)	4245	NR_015618	77810	Mm.483143	NR_015618		A930015D03Rik	-	RIKEN cDNA A930015D03 gene	ncRNA
chr17_36001156_36001493	chr17	36001157	36001493	+	0.698329	NA	intron (NR_015618, intron 1 of 1)	intron (NR_015618, intron 1 of 1)	6821	NR_015618	77810	Mm.483143	NR_015618		A930015D03Rik	-	RIKEN cDNA A930015D03 gene	ncRNA
chr2_104176669_104177154	chr2	104176670	104177154	+	1.01899	NA	intron (NM_001033347, intron 16 of 20)	intron (NM_001033347, intron 16 of 20)	54143	NM_026634	68243	Mm.158191	NM_026634	ENSMUSG00000032671	A930018P22Rik	-	RIKEN cDNA A930018P22 gene	protein-coding
chr2_104207924_104208367	chr2	104207925	104208367	+	0.802936	NA	exon (NM_001033347, exon 13 of 21)	exon (NM_001033347, exon 13 of 21)	85377	NM_026634	68243	Mm.158191	NM_026634	ENSMUSG00000032671	A930018P22Rik	-	RIKEN cDNA A930018P22 gene	protein-coding
chr2_104207928_104208714	chr2	104207929	104208714	+	0.747764	NA	intron (NM_001033347, intron 12 of 20)	intron (NM_001033347, intron 12 of 20)	85552	NM_026634	68243	Mm.158191	NM_026634	ENSMUSG00000032671	A930018P22Rik	-	RIKEN cDNA A930018P22 gene	protein-coding
chr2_146254181_146254886	chr2	146254182	146254886	+	1.58322	NA	intron (NM_001033348, intron 39 of 40)	intron (NM_001033348, intron 39 of 40)	-4752	NR_040619	77806	Mm.392819	NR_040619	ENSMUSG00000085958	A930019D19Rik	-	RIKEN cDNA A930019D19 gene	ncRNA
chr5_107648731_107649103	chr5	107648732	107649103	+	0.673183	NA	intron (NM_144911, intron 11 of 12)	intron (NM_144911, intron 11 of 12)	-15067	NR_046195	78443	Mm.490703	NR_046195	ENSMUSG00000085900	A930041C12Rik	-	RIKEN cDNA A930041C12 gene	ncRNA
chr5_107647644_107648013	chr5	107647645	107648013	+	0.662832	NA	intron (NM_144911, intron 11 of 12)	intron (NM_144911, intron 11 of 12)	-13979	NR_046195	78443	Mm.490703	NR_046195	ENSMUSG00000085900	A930041C12Rik	-	RIKEN cDNA A930041C12 gene	ncRNA
chr5_107645989_107646351	chr5	107645990	107646351	+	0.611165	NA	intron (NM_144911, intron 11 of 12)	B1_Mur1|SINE|Alu	-12320	NR_046195	78443	Mm.490703	NR_046195	ENSMUSG00000085900	A930041C12Rik	-	RIKEN cDNA A930041C12 gene	ncRNA
chrX_12959948_12960250	chrX	12959949	12960250	+	0.805968	NA	Intergenic	Intergenic	23226	NM_001272033	245350	Mm.302695	NM_001272033		AA414768	OTTMUSG00000017000	expressed sequence AA414768	protein-coding
chr1_130761079_130761682	chr1	130761080	130761682	+	0.686046	NA	Intergenic	Intergenic	29405	NM_177604	212439	Mm.268547	NM_177604	ENSMUSG00000042510	AA986860	E030025M07|Sarg	expressed sequence AA986860	protein-coding
chr9_63678089_63678560	chr9	63678090	63678560	+	0.695159	NA	intron (NM_016769, intron 1 of 8)	intron (NM_016769, intron 1 of 8)	75670	NM_025857	66939	Mm.34338	NM_025857	ENSMUSG00000037257	Aagab	2310007F21Rik|p34	alpha- and gamma-adaptin binding protein	protein-coding
chr9_63674585_63674985	chr9	63674586	63674985	+	0.686674	NA	intron (NM_016769, intron 1 of 8)	intron (NM_016769, intron 1 of 8)	72130	NM_025857	66939	Mm.34338	NM_025857	ENSMUSG00000037257	Aagab	2310007F21Rik|p34	alpha- and gamma-adaptin binding protein	protein-coding
chr2_156539130_156539639	chr2	156539131	156539639	+	0.791214	NA	intron (NM_001291122, intron 20 of 20)	intron (NM_001291122, intron 20 of 20)	-8191	NM_026661	68295	Mm.253648	NM_026661	ENSMUSG00000027628	Aar2	0610011L14Rik	AAR2 splicing factor homolog (S. cerevisiae)	protein-coding
chr15_52039530_52040636	chr15	52039531	52040636	+	0.925402	NA	promoter-TSS (NM_175503)	promoter-TSS (NM_175503)	-24	NM_175503	239435	Mm.24204	NM_175503	ENSMUSG00000068522	Aard	A5D3|AV328152	alanine and arginine rich domain containing protein	protein-coding
chr4_53118517_53119095	chr4	53118518	53119095	+	0.681545	NA	intron (NM_013454, intron 5 of 49)	MIR|SINE|MIR	41089	NM_013454	11303	Mm.277376	NM_013454	ENSMUSG00000015243	Abca1	ABC-1|Abc1	ATP-binding cassette, sub-family A (ABC1), member 1	protein-coding
chr5_8722250_8723196	chr5	8722251	8723196	+	0.776475	NA	intron (NM_011076, intron 19 of 27)	intron (NM_011076, intron 19 of 27)	62631	NM_011076	18671	Mm.207354	NM_011076	ENSMUSG00000040584	Abcb1a	Abcb4|Evi32|Mdr1a|Mdr3|P-gp|Pgp|Pgy-3|Pgy3|mdr-3	ATP-binding cassette, sub-family B (MDR/TAP), member 1A	protein-coding
chr5_8668346_8668928	chr5	8668347	8668928	+	0.766801	NA	intron (NM_011076, intron 3 of 27)	intron (NM_011076, intron 3 of 27)	8545	NM_011076	18671	Mm.207354	NM_011076	ENSMUSG00000040584	Abcb1a	Abcb4|Evi32|Mdr1a|Mdr3|P-gp|Pgp|Pgy-3|Pgy3|mdr-3	ATP-binding cassette, sub-family B (MDR/TAP), member 1A	protein-coding
chr5_8761651_8762211	chr5	8761652	8762211	+	1.25077	NA	Intergenic	L1VL2|LINE|L1	-36216	NM_011075	18669	Mm.146649	NM_011075	ENSMUSG00000028970	Abcb1b	Abcb1|Mdr1|Mdr1b|Pgy-1|Pgy1|mdr	ATP-binding cassette, sub-family B (MDR/TAP), member 1B	protein-coding
chr5_8826886_8827355	chr5	8826887	8827355	+	0.699054	NA	intron (NM_011075, intron 15 of 27)	intron (NM_011075, intron 15 of 27)	28974	NM_011075	18669	Mm.146649	NM_011075	ENSMUSG00000028970	Abcb1b	Abcb1|Mdr1|Mdr1b|Pgy-1|Pgy1|mdr	ATP-binding cassette, sub-family B (MDR/TAP), member 1B	protein-coding
chr5_8805766_8806115	chr5	8805767	8806115	+	0.638817	NA	intron (NM_011075, intron 3 of 27)	intron (NM_011075, intron 3 of 27)	7794	NM_011075	18669	Mm.146649	NM_011075	ENSMUSG00000028970	Abcb1b	Abcb1|Mdr1|Mdr1b|Pgy-1|Pgy1|mdr	ATP-binding cassette, sub-family B (MDR/TAP), member 1B	protein-coding
chrX_104375547_104376199	chrX	104375548	104376199	+	0.800652	NA	intron (NM_009592, intron 1 of 15)	ORR1E|LTR|ERVL-MaLR	37973	NM_009592	11306	Mm.426128	NM_009592	ENSMUSG00000031333	Abcb7	AA517758|AU019072|Abc7	ATP-binding cassette, sub-family B (MDR/TAP), member 7	protein-coding
chrX_104375783_104376174	chrX	104375784	104376174	+	0.768097	NA	intron (NM_009592, intron 1 of 15)	Tigger7|DNA|TcMar-Tigger	37867	NM_009592	11306	Mm.426128	NM_009592	ENSMUSG00000031333	Abcb7	AA517758|AU019072|Abc7	ATP-binding cassette, sub-family B (MDR/TAP), member 7	protein-coding
chr16_14350312_14351232	chr16	14350313	14351232	+	0.881153	NA	Intergenic	L1MB3|LINE|L1	-10786	NM_008576	17250	Mm.196634	NM_008576	ENSMUSG00000023088	Abcc1	Abcc1a|Abcc1b|MRP|Mdrap|Mrp1	ATP-binding cassette, sub-family C (CFTR/MRP), member 1	protein-coding
chr16_14350629_14351212	chr16	14350630	14351212	+	0.867891	NA	Intergenic	L1MB3|LINE|L1	-10637	NM_008576	17250	Mm.196634	NM_008576	ENSMUSG00000023088	Abcc1	Abcc1a|Abcc1b|MRP|Mdrap|Mrp1	ATP-binding cassette, sub-family C (CFTR/MRP), member 1	protein-coding
chr19_43771490_43771926	chr19	43771491	43771926	+	1.04225	NA	Intergenic	L1M4|LINE|L1	-10600	NM_013806	12780	Mm.39054	NM_013806	ENSMUSG00000025194	Abcc2	AI173996|Abc30|Cmoat|Mrp2|cMRP	ATP-binding cassette, sub-family C (CFTR/MRP), member 2	protein-coding
chr14_118657960_118658775	chr14	118657961	118658775	+	0.943807	NA	intron (NM_001163675, intron 3 of 30)	intron (NM_001163675, intron 3 of 30)	18563	NM_001163675	239273	Mm.40537	NM_001033336	ENSMUSG00000032849	Abcc4	D630049P08Rik|MOATB|MRP4	ATP-binding cassette, sub-family C (CFTR/MRP), member 4	protein-coding
chr3_121796871_121797687	chr3	121796872	121797687	+	1.17286	NA	intron (NM_008991, intron 1 of 22)	intron (NM_008991, intron 1 of 22)	17936	NM_008991	19299	Mm.399042	NM_008991	ENSMUSG00000028127	Abcd3	AI313901|AU018866|AW146054|PMP68|PMP70|Pxmp1	ATP-binding cassette, sub-family D (ALD), member 3	protein-coding
chr3_121872690_121873174	chr3	121872691	121873174	+	0.989593	NA	Intergenic	Intergenic	-57717	NM_008991	19299	Mm.399042	NM_008991	ENSMUSG00000028127	Abcd3	AI313901|AU018866|AW146054|PMP68|PMP70|Pxmp1	ATP-binding cassette, sub-family D (ALD), member 3	protein-coding
chr3_121874415_121874936	chr3	121874416	121874936	+	0.984107	NA	Intergenic	Intergenic	-59461	NM_008991	19299	Mm.399042	NM_008991	ENSMUSG00000028127	Abcd3	AI313901|AU018866|AW146054|PMP68|PMP70|Pxmp1	ATP-binding cassette, sub-family D (ALD), member 3	protein-coding
chr3_121796866_121798265	chr3	121796867	121798265	+	0.830606	NA	intron (NM_008991, intron 1 of 22)	RLTR11A|LTR|ERVK	17649	NM_008991	19299	Mm.399042	NM_008991	ENSMUSG00000028127	Abcd3	AI313901|AU018866|AW146054|PMP68|PMP70|Pxmp1	ATP-binding cassette, sub-family D (ALD), member 3	protein-coding
chr3_121844012_121844605	chr3	121844013	121844605	+	0.727783	NA	Intergenic	MIRb|SINE|MIR	-29094	NM_008991	19299	Mm.399042	NM_008991	ENSMUSG00000028127	Abcd3	AI313901|AU018866|AW146054|PMP68|PMP70|Pxmp1	ATP-binding cassette, sub-family D (ALD), member 3	protein-coding
chr8_79678921_79679368	chr8	79678922	79679368	+	1.72763	NA	Intergenic	Intergenic	32595	NM_015751	24015	Mm.5831	NM_015751	ENSMUSG00000058355	Abce1	C79080|Oabp|RLI|RNS41|Rnaseli	ATP-binding cassette, sub-family E (OABP), member 1	protein-coding
chr6_58624176_58625054	chr6	58624177	58625054	+	0.679221	NA	intron (NM_011920, intron 1 of 15)	ORR1E|LTR|ERVL-MaLR	27943	NM_011920	26357	Mm.333096	NM_011920	ENSMUSG00000029802	Abcg2	ABC15|ABCP|AI428558|BCRP|Bcrp1|MXR|MXR1	ATP-binding cassette, sub-family G (WHITE), member 2	protein-coding
chr5_105004383_105004786	chr5	105004384	105004786	+	1.28647	NA	Intergenic	Intergenic	-21868	NM_030239	27405	Mm.389663	NM_030239	ENSMUSG00000029299	Abcg3	Abcp2|Mxr2	ATP-binding cassette, sub-family G (WHITE), member 3	protein-coding
chr5_104946589_104947086	chr5	104946590	104947086	+	1.00727	NA	intron (NM_030239, intron 13 of 15)	Lx8b|LINE|L1	35879	NM_030239	27405	Mm.389663	NM_030239	ENSMUSG00000029299	Abcg3	Abcp2|Mxr2	ATP-binding cassette, sub-family G (WHITE), member 3	protein-coding
chr5_105010390_105010815	chr5	105010391	105010815	+	0.934303	NA	Intergenic	Intergenic	-27886	NM_030239	27405	Mm.389663	NM_030239	ENSMUSG00000029299	Abcg3	Abcp2|Mxr2	ATP-binding cassette, sub-family G (WHITE), member 3	protein-coding
chr5_105010154_105010913	chr5	105010155	105010913	+	0.926529	NA	Intergenic	Intergenic	-27817	NM_030239	27405	Mm.389663	NM_030239	ENSMUSG00000029299	Abcg3	Abcp2|Mxr2	ATP-binding cassette, sub-family G (WHITE), member 3	protein-coding
chr5_105005088_105005495	chr5	105005089	105005495	+	0.710655	NA	Intergenic	Intergenic	-22575	NM_030239	27405	Mm.389663	NM_030239	ENSMUSG00000029299	Abcg3	Abcp2|Mxr2	ATP-binding cassette, sub-family G (WHITE), member 3	protein-coding
chr5_104938639_104939044	chr5	104938640	104939044	+	0.702663	NA	intron (NM_030239, intron 14 of 15)	intron (NM_030239, intron 14 of 15)	43875	NM_030239	27405	Mm.389663	NM_030239	ENSMUSG00000029299	Abcg3	Abcp2|Mxr2	ATP-binding cassette, sub-family G (WHITE), member 3	protein-coding
chr5_104960312_104960797	chr5	104960313	104960797	+	0.675605	NA	intron (NM_030239, intron 10 of 15)	L1MB3|LINE|L1	22162	NM_030239	27405	Mm.389663	NM_030239	ENSMUSG00000029299	Abcg3	Abcp2|Mxr2	ATP-binding cassette, sub-family G (WHITE), member 3	protein-coding
chr16_45758441_45759189	chr16	45758442	45759189	+	0.753372	NA	intron (NM_153412, intron 13 of 17)	intron (NM_153412, intron 13 of 17)	-15860	NM_172511	213012	Mm.247453	NM_172511	ENSMUSG00000033157	Abhd10	-	abhydrolase domain containing 10	protein-coding
chr11_77531980_77532754	chr11	77531981	77532754	+	0.701507	NA	3' UTR (NM_144825, exon 20 of 20)	3' UTR (NM_144825, exon 20 of 20)	17250	NM_026185	67477	Mm.432526	NM_026185	ENSMUSG00000000686	Abhd15	1300007F04Rik	abhydrolase domain containing 15	protein-coding
chr7_84148879_84149456	chr7	84148880	84149456	+	1.11961	NA	intron (NM_133722, intron 1 of 2)	intron (NM_133722, intron 1 of 2)	2725	NM_133722	70178	Mm.23914	NM_133722	ENSMUSG00000038459	Abhd17c	2210412D01Rik|AL023007|Fam108c|Fam108c1	abhydrolase domain containing 17C	protein-coding
chr7_84158760_84159118	chr7	84158761	84159118	+	0.754213	NA	Intergenic	Intergenic	-7046	NM_133722	70178	Mm.23914	NM_133722	ENSMUSG00000038459	Abhd17c	2210412D01Rik|AL023007|Fam108c|Fam108c1	abhydrolase domain containing 17C	protein-coding
chr2_23048002_23048534	chr2	23048003	23048534	+	1.25742	NA	Intergenic	ORR1B1|LTR|ERVL-MaLR	-8027	NM_145994	11308	Mm.205647	NM_007380	ENSMUSG00000058835	Abi1	E3B1|NAP1|Ssh3bp1	abl-interactor 1	protein-coding
chr2_23047993_23048859	chr2	23047994	23048859	+	1.00969	NA	Intergenic	(TC)n|Simple_repeat|Simple_repeat	-8185	NM_145994	11308	Mm.205647	NM_007380	ENSMUSG00000058835	Abi1	E3B1|NAP1|Ssh3bp1	abl-interactor 1	protein-coding
chr2_23005336_23005655	chr2	23005337	23005655	+	0.865465	NA	intron (NM_145994, intron 1 of 9)	MLTR25A|LTR|ERVK	34745	NM_001077192	11308	Mm.205647	NM_007380	ENSMUSG00000058835	Abi1	E3B1|NAP1|Ssh3bp1	abl-interactor 1	protein-coding
chr2_23005436_23005655	chr2	23005437	23005655	+	0.736719	NA	intron (NM_145994, intron 1 of 9)	MLTR25A|LTR|ERVK	34695	NM_001077192	11308	Mm.205647	NM_007380	ENSMUSG00000058835	Abi1	E3B1|NAP1|Ssh3bp1	abl-interactor 1	protein-coding
chr2_23006128_23006817	chr2	23006129	23006817	+	0.649551	NA	intron (NM_145994, intron 1 of 9)	Lx8|LINE|L1	33768	NM_001077192	11308	Mm.205647	NM_007380	ENSMUSG00000058835	Abi1	E3B1|NAP1|Ssh3bp1	abl-interactor 1	protein-coding
chr16_56556139_56556528	chr16	56556140	56556528	+	0.617384	NA	intron (NM_001014424, intron 2 of 36)	intron (NM_001014424, intron 2 of 36)	78488	NM_001014424	320712	Mm.209236	NM_178790	ENSMUSG00000035258	Abi3bp	5033411B22Rik|AI506287|BG172926|D930038M13Rik|TARSH|eratin	ABI gene family, member 3 (NESH) binding protein	protein-coding
chr19_57167996_57168571	chr19	57167997	57168571	+	0.948892	NA	intron (NM_001290813, intron 2 of 20)	intron (NM_001290813, intron 2 of 20)	29347	NM_001103177	226251	Mm.217161	NM_178688	ENSMUSG00000025085	Ablim1	2210411C18Rik|2610209L21Rik|4833406P10Rik|9330196J19Rik|AV079770|AW060987|AW215784|Limab1|mKIAA0059	actin-binding LIM protein 1	protein-coding
chr19_57167610_57168575	chr19	57167611	57168575	+	0.808724	NA	intron (NM_001290813, intron 2 of 20)	intron (NM_001290813, intron 2 of 20)	29538	NM_001103177	226251	Mm.217161	NM_178688	ENSMUSG00000025085	Ablim1	2210411C18Rik|2610209L21Rik|4833406P10Rik|9330196J19Rik|AV079770|AW060987|AW215784|Limab1|mKIAA0059	actin-binding LIM protein 1	protein-coding
chr19_57082309_57082785	chr19	57082310	57082785	+	0.724404	NA	intron (NM_001290813, intron 7 of 20)	intron (NM_001290813, intron 7 of 20)	36477	NM_001103178	226251	Mm.217161	NM_178688	ENSMUSG00000025085	Ablim1	2210411C18Rik|2610209L21Rik|4833406P10Rik|9330196J19Rik|AV079770|AW060987|AW215784|Limab1|mKIAA0059	actin-binding LIM protein 1	protein-coding
chr5_35817283_35817678	chr5	35817284	35817678	+	1.05339	NA	intron (NM_001177700, intron 6 of 16)	intron (NM_001177700, intron 6 of 16)	59601	NM_177678	231148	Mm.254446	NM_177678	ENSMUSG00000029095	Ablim2	AI606905|C230091L11	actin-binding LIM protein 2	protein-coding
chr5_35817896_35818308	chr5	35817897	35818308	+	0.775459	NA	intron (NM_001177700, intron 6 of 16)	intron (NM_001177700, intron 6 of 16)	60222	NM_177678	231148	Mm.254446	NM_177678	ENSMUSG00000029095	Ablim2	AI606905|C230091L11	actin-binding LIM protein 2	protein-coding
chr5_35817882_35818434	chr5	35817883	35818434	+	0.758953	NA	intron (NM_001177700, intron 6 of 16)	intron (NM_001177700, intron 6 of 16)	60278	NM_177678	231148	Mm.254446	NM_177678	ENSMUSG00000029095	Ablim2	AI606905|C230091L11	actin-binding LIM protein 2	protein-coding
chr11_76572810_76573289	chr11	76572811	76573289	+	0.797275	NA	intron (NM_198894, intron 1 of 22)	intron (NM_198894, intron 1 of 22)	-1666	NM_198895	109934	Mm.258939	NM_198018	ENSMUSG00000017631	Abr	-	active BCR-related gene	protein-coding
chr11_76483967_76484483	chr11	76483968	76484483	+	0.643925	NA	intron (NM_198894, intron 3 of 22)	MIR|SINE|MIR	-15760	NM_001291186	109934	Mm.258939	NM_198018	ENSMUSG00000017631	Abr	-	active BCR-related gene	protein-coding
chr15_41914471_41915122	chr15	41914472	41915122	+	1.20885	NA	Intergenic	RLTR19|LTR|ERVK	-45077	NM_175456	223513	Mm.148913	NM_175456	ENSMUSG00000042895	Abra	C130068O12Rik|STARS	actin-binding Rho activating protein	protein-coding
chr15_42167429_42167849	chr15	42167430	42167849	+	1.04366	NA	Intergenic	Intergenic	-297919	NM_175456	223513	Mm.148913	NM_175456	ENSMUSG00000042895	Abra	C130068O12Rik|STARS	actin-binding Rho activating protein	protein-coding
chr15_41905030_41905403	chr15	41905031	41905403	+	0.954614	NA	Intergenic	Intergenic	-35497	NM_175456	223513	Mm.148913	NM_175456	ENSMUSG00000042895	Abra	C130068O12Rik|STARS	actin-binding Rho activating protein	protein-coding
chr13_23426902_23427219	chr13	23426903	23427219	+	1.08561	NA	TTS (NR_015492)	TTS (NR_015492)	-3195	NM_013924	30946	Mm.292094	NM_013924		Abt1	-	activator of basal transcription 1	protein-coding
chr13_23412353_23413162	chr13	23412354	23413162	+	1.03556	NA	Intergenic	Intergenic	11108	NM_013924	30946	Mm.292094	NM_013924		Abt1	-	activator of basal transcription 1	protein-coding
chr13_23396992_23397269	chr13	23396993	23397269	+	0.859247	NA	Intergenic	tRNA-Ile-ATT|tRNA|tRNA	26735	NM_013924	30946	Mm.292094	NM_013924		Abt1	-	activator of basal transcription 1	protein-coding
chr13_23425505_23425792	chr13	23425506	23425792	+	0.810445	NA	Intergenic	tRNA-Tyr-TAC|tRNA|tRNA	-1783	NM_013924	30946	Mm.292094	NM_013924		Abt1	-	activator of basal transcription 1	protein-coding
chr13_23426463_23426698	chr13	23426464	23426698	+	0.806457	NA	Intergenic	tRNA-Tyr-TAC|tRNA|tRNA	-2715	NM_013924	30946	Mm.292094	NM_013924		Abt1	-	activator of basal transcription 1	protein-coding
chr2_103657592_103658154	chr2	103657593	103658154	+	1.52674	NA	intron (NM_178890, intron 1 of 16)	intron (NM_178890, intron 1 of 16)	91563	NM_178890	99382	Mm.35850	NM_178890	ENSMUSG00000032724	Abtb2	AW539457|BPOZ-2	ankyrin repeat and BTB (POZ) domain containing 2	protein-coding
chr2_103568774_103569127	chr2	103568775	103569127	+	1.45879	NA	intron (NM_178890, intron 1 of 16)	MER21B|LTR|ERVL	2641	NM_178890	99382	Mm.35850	NM_178890	ENSMUSG00000032724	Abtb2	AW539457|BPOZ-2	ankyrin repeat and BTB (POZ) domain containing 2	protein-coding
chr2_103655531_103656357	chr2	103655532	103656357	+	0.997735	NA	intron (NM_178890, intron 1 of 16)	intron (NM_178890, intron 1 of 16)	89634	NM_178890	99382	Mm.35850	NM_178890	ENSMUSG00000032724	Abtb2	AW539457|BPOZ-2	ankyrin repeat and BTB (POZ) domain containing 2	protein-coding
chr2_103642428_103642932	chr2	103642429	103642932	+	0.912381	NA	intron (NM_178890, intron 1 of 16)	Tigger7|DNA|TcMar-Tigger	76370	NM_178890	99382	Mm.35850	NM_178890	ENSMUSG00000032724	Abtb2	AW539457|BPOZ-2	ankyrin repeat and BTB (POZ) domain containing 2	protein-coding
chr2_103569725_103570135	chr2	103569726	103570135	+	0.901172	NA	intron (NM_178890, intron 1 of 16)	intron (NM_178890, intron 1 of 16)	3620	NM_178890	99382	Mm.35850	NM_178890	ENSMUSG00000032724	Abtb2	AW539457|BPOZ-2	ankyrin repeat and BTB (POZ) domain containing 2	protein-coding
chr2_103561014_103561305	chr2	103561015	103561305	+	0.884779	NA	Intergenic	RLTR53_Mm|LTR|ERVK	-5150	NM_178890	99382	Mm.35850	NM_178890	ENSMUSG00000032724	Abtb2	AW539457|BPOZ-2	ankyrin repeat and BTB (POZ) domain containing 2	protein-coding
chr2_103595008_103595323	chr2	103595009	103595323	+	0.754242	NA	intron (NM_178890, intron 1 of 16)	intron (NM_178890, intron 1 of 16)	28856	NM_178890	99382	Mm.35850	NM_178890	ENSMUSG00000032724	Abtb2	AW539457|BPOZ-2	ankyrin repeat and BTB (POZ) domain containing 2	protein-coding
chr2_103640910_103641132	chr2	103640911	103641132	+	0.652806	NA	intron (NM_178890, intron 1 of 16)	intron (NM_178890, intron 1 of 16)	74711	NM_178890	99382	Mm.35850	NM_178890	ENSMUSG00000032724	Abtb2	AW539457|BPOZ-2	ankyrin repeat and BTB (POZ) domain containing 2	protein-coding
chr2_103607094_103607378	chr2	103607095	103607378	+	0.624717	NA	intron (NM_178890, intron 1 of 16)	intron (NM_178890, intron 1 of 16)	40926	NM_178890	99382	Mm.35850	NM_178890	ENSMUSG00000032724	Abtb2	AW539457|BPOZ-2	ankyrin repeat and BTB (POZ) domain containing 2	protein-coding
chr18_74786239_74786704	chr18	74786240	74786704	+	1.20222	NA	intron (NM_177470, intron 1 of 9)	intron (NM_177470, intron 1 of 9)	7260	NM_177470	52538	Mm.245724	NM_177470	ENSMUSG00000036880	Acaa2	0610011L04Rik|AI255831|AI265397|D18Ertd240e	acetyl-Coenzyme A acyltransferase 2 (mitochondrial 3-oxoacyl-Coenzyme A thiolase)	protein-coding
chr18_74787138_74787424	chr18	74787139	74787424	+	0.827372	NA	exon (NM_177470, exon 2 of 10)	exon (NM_177470, exon 2 of 10)	8069	NM_177470	52538	Mm.245724	NM_177470	ENSMUSG00000036880	Acaa2	0610011L04Rik|AI255831|AI265397|D18Ertd240e	acetyl-Coenzyme A acyltransferase 2 (mitochondrial 3-oxoacyl-Coenzyme A thiolase)	protein-coding
chr5_114175514_114176245	chr5	114175515	114176245	+	0.766199	NA	intron (NM_133904, intron 1 of 51)	intron (NM_133904, intron 1 of 51)	10362	NM_133904	100705	Mm.81793	NM_133904	ENSMUSG00000042010	Acacb	AI597064|AW743042|Acc2|Accb	acetyl-Coenzyme A carboxylase beta	protein-coding
chr5_121623248_121623627	chr5	121623249	121623627	+	0.72914	NA	intron (NM_028037, intron 18 of 20)	PB1D9|SINE|Alu	-4500	NM_178799	338350	Mm.482918	NM_178799	ENSMUSG00000042647	Acad12	9330129D05Rik	acyl-Coenzyme A dehydrogenase family, member 12	protein-coding
chr1_66878402_66878755	chr1	66878403	66878755	+	0.61856	NA	Intergenic	ORR1E|LTR|ERVL-MaLR	-15270	NM_007381	11363	Mm.2445	NM_007381	ENSMUSG00000026003	Acadl	AA960361|AU018452|C79855|LCAD	acyl-Coenzyme A dehydrogenase, long-chain	protein-coding
chr3_153957669_153958396	chr3	153957670	153958396	+	1.22213	NA	Intergenic	RLTR48A|LTR|ERV1	-13390	NM_007382	11364	Mm.10530	NM_007382	ENSMUSG00000062908	Acadm	AU018656|MCAD	acyl-Coenzyme A dehydrogenase, medium chain	protein-coding
chr16_31233572_31234467	chr16	31233573	31234467	+	0.938693	NA	intron (NR_035427, intron 1 of 2)	intron (NR_035427, intron 1 of 2)	-32782	NM_030138	78618	Mm.274646	NM_030138	ENSMUSG00000049076	Acap2	4832442G16|9530039J15Rik|CNT-B2|Centb2|mKIAA0041	ArfGAP with coiled-coil, ankyrin repeat and PH domains 2	protein-coding
chr16_31235422_31235855	chr16	31235423	31235855	+	0.83729	NA	intron (NR_035427, intron 1 of 2)	intron (NR_035427, intron 1 of 2)	-34401	NM_030138	78618	Mm.274646	NM_030138	ENSMUSG00000049076	Acap2	4832442G16|9530039J15Rik|CNT-B2|Centb2|mKIAA0041	ArfGAP with coiled-coil, ankyrin repeat and PH domains 2	protein-coding
chr16_31235488_31235766	chr16	31235489	31235766	+	0.836983	NA	intron (NR_035427, intron 1 of 2)	intron (NR_035427, intron 1 of 2)	-34389	NM_030138	78618	Mm.274646	NM_030138	ENSMUSG00000049076	Acap2	4832442G16|9530039J15Rik|CNT-B2|Centb2|mKIAA0041	ArfGAP with coiled-coil, ankyrin repeat and PH domains 2	protein-coding
chr1_180765443_180765799	chr1	180765444	180765799	+	0.937782	NA	Intergenic	Intergenic	39578	NM_133225	170760	Mm.272981	NM_133225	ENSMUSG00000026499	Acbd3	60kDa|8430407O11Rik|D1Ertd10e|GCP60|GOLPH1|Gocap1|Pap7	acyl-Coenzyme A binding domain containing 3	protein-coding
chr2_23088744_23089229	chr2	23088745	23089229	+	1.31136	NA	intron (NM_028793, intron 6 of 12)	intron (NM_028793, intron 6 of 12)	19915	NM_001102438	74159	Mm.181973	NM_028793	ENSMUSG00000026781	Acbd5	1300014E15Rik	acyl-Coenzyme A binding domain containing 5	protein-coding
chr1_155510215_155510739	chr1	155510216	155510739	+	0.996413	NA	Intergenic	Intergenic	-47643	NM_001145781	72482	Mm.288249	NM_026683	ENSMUSG00000033701	Acbd6	0610010G04Rik|2610100E10Rik	acyl-Coenzyme A binding domain containing 6	protein-coding
chr1_155647605_155647882	chr1	155647606	155647882	+	0.895602	NA	intron (NM_028250, intron 6 of 7)	intron (NM_028250, intron 6 of 7)	89624	NM_026683	72482	Mm.288249	NM_026683	ENSMUSG00000033701	Acbd6	0610010G04Rik|2610100E10Rik	acyl-Coenzyme A binding domain containing 6	protein-coding
chr2_3339021_3339559	chr2	3339022	3339559	+	1.07223	NA	intron (NM_030063, intron 1 of 3)	intron (NM_030063, intron 1 of 3)	3122	NM_030063	78245	Mm.99733	NM_030063	ENSMUSG00000026644	Acbd7	9230116B18Rik	acyl-Coenzyme A binding domain containing 7	protein-coding
chr11_100524356_100524681	chr11	100524357	100524681	+	0.955775	NA	intron (NM_134037, intron 1 of 27)	intron (NM_134037, intron 1 of 27)	3481	NM_134037	104112	Mm.282039	NM_134037	ENSMUSG00000020917	Acly	A730098H14Rik|AW538652	ATP citrate lyase	protein-coding
chr4_40171244_40171794	chr4	40171245	40171794	+	0.865132	NA	intron (NM_007386, intron 4 of 20)	URR1A|DNA|hAT-Charlie	28254	NM_007386	11428	Mm.331547	NM_007386	ENSMUSG00000028405	Aco1	Aco-1|Irebp|Irp1	aconitase 1	protein-coding
chr15_81875625_81876013	chr15	81875626	81876013	+	0.858926	NA	intron (NM_080633, intron 1 of 17)	intron (NM_080633, intron 1 of 17)	3356	NM_080633	11429	Mm.154581	NM_080633	ENSMUSG00000022477	Aco2	Aco-2|Aco3|D10Wsu183e	aconitase 2, mitochondrial	protein-coding
chr15_19858681_19859021	chr15	19858682	19859021	+	0.873031	NA	Intergenic	Intergenic	807899	NM_022816	64833	Mm.352763	NM_022816	ENSMUSG00000047565	Acot10	Acate3|MT-ACT48|p48	acyl-CoA thioesterase 10	protein-coding
chr13_91663343_91663887	chr13	91663344	91663887	+	1.42706	NA	intron (NM_024272, intron 5 of 16)	intron (NM_024272, intron 5 of 16)	-77906	NM_028790	74156	Mm.275963	NM_028790	ENSMUSG00000021620	Acot12	1300004O04Rik|4930449F15Rik|AV027244|Cach|mCACH-1	acyl-CoA thioesterase 12	protein-coding
chr13_91681108_91681416	chr13	91681109	91681416	+	0.767227	NA	intron (NM_024272, intron 10 of 16)	intron (NM_024272, intron 10 of 16)	-60259	NM_028790	74156	Mm.275963	NM_028790	ENSMUSG00000021620	Acot12	1300004O04Rik|4930449F15Rik|AV027244|Cach|mCACH-1	acyl-CoA thioesterase 12	protein-coding
chr13_91680919_91681423	chr13	91680920	91681423	+	0.643844	NA	intron (NM_024272, intron 10 of 16)	intron (NM_024272, intron 10 of 16)	-60350	NM_028790	74156	Mm.275963	NM_028790	ENSMUSG00000021620	Acot12	1300004O04Rik|4930449F15Rik|AV027244|Cach|mCACH-1	acyl-CoA thioesterase 12	protein-coding
chr13_24829015_24829284	chr13	24829016	24829284	+	1.22283	NA	intron (NM_025790, intron 1 of 2)	intron (NM_025790, intron 1 of 2)	2339	NM_025790	66834	Mm.2125	NM_025790	ENSMUSG00000006717	Acot13	0610006O17Rik|Them2	acyl-CoA thioesterase 13	protein-coding
chr4_152185123_152186185	chr4	152185124	152186185	+	0.822974	NA	promoter-TSS (NM_001146057)	promoter-TSS (NM_001146057)	-480	NM_001146057	70025	Mm.296191	NM_133348	ENSMUSG00000028937	Acot7	2410041A17Rik|Ach1|Act|Bach|CTE-IIa|Cte-II|Lach1	acyl-CoA thioesterase 7	protein-coding
chrX_155278442_155278852	chrX	155278443	155278852	+	1.07259	NA	intron (NM_019736, intron 5 of 14)	intron (NM_019736, intron 5 of 14)	16147	NM_019736	56360	Mm.268710	NM_019736	ENSMUSG00000025287	Acot9	0610041P13Rik|Acate2|C76421|MT-ACT48|U8|p48	acyl-CoA thioesterase 9	protein-coding
chr2_127929859_127930232	chr2	127929860	127930232	+	0.743633	NA	intron (NM_028765, intron 9 of 17)	intron (NM_028765, intron 9 of 17)	75418	NM_028765	74121	Mm.244835	NM_028765	ENSMUSG00000027380	Acoxl	1200014P05Rik|AV025673	acyl-Coenzyme A oxidase-like	protein-coding
chr8_46469245_46469445	chr8	46469246	46469445	+	0.784036	NA	Intergenic	Intergenic	-1697	NM_007981	14081	Mm.210323	NM_007981	ENSMUSG00000018796	Acsl1	Acas|Acas1|Acs|FACS|Facl2	acyl-CoA synthetase long-chain family member 1	protein-coding
chr8_46511101_46511710	chr8	46511102	46511710	+	0.769154	NA	exon (NM_007981, exon 5 of 21)	exon (NM_007981, exon 5 of 21)	40364	NM_007981	14081	Mm.210323	NM_007981	ENSMUSG00000018796	Acsl1	Acas|Acas1|Acs|FACS|Facl2	acyl-CoA synthetase long-chain family member 1	protein-coding
chr8_46511313_46511668	chr8	46511314	46511668	+	0.709688	NA	intron (NM_007981, intron 5 of 20)	intron (NM_007981, intron 5 of 20)	40449	NM_007981	14081	Mm.210323	NM_007981	ENSMUSG00000018796	Acsl1	Acas|Acas1|Acs|FACS|Facl2	acyl-CoA synthetase long-chain family member 1	protein-coding
chrX_142489667_142490738	chrX	142489668	142490738	+	1.3564	NA	Intergenic	Intergenic	-99668	NM_019477	50790	Mm.391337	NM_019477	ENSMUSG00000031278	Acsl4	9430020A05Rik|ACS4|AU018108|Facl4|Lacs4	acyl-CoA synthetase long-chain family member 4	protein-coding
chrX_142472954_142473276	chrX	142472955	142473276	+	0.930736	NA	Intergenic	Intergenic	-82580	NM_019477	50790	Mm.391337	NM_019477	ENSMUSG00000031278	Acsl4	9430020A05Rik|ACS4|AU018108|Facl4|Lacs4	acyl-CoA synthetase long-chain family member 4	protein-coding
chrX_142488906_142489231	chrX	142488907	142489231	+	0.775998	NA	Intergenic	Intergenic	-98534	NM_019477	50790	Mm.391337	NM_019477	ENSMUSG00000031278	Acsl4	9430020A05Rik|ACS4|AU018108|Facl4|Lacs4	acyl-CoA synthetase long-chain family member 4	protein-coding
chr11_54293993_54294964	chr11	54293994	54294964	+	1.29572	NA	Intergenic	Intergenic	-9345	NM_001033598	216739	Mm.267478	NM_144823	ENSMUSG00000020333	Acsl6	A330035H04Rik|AW050338|Facl6|LACS|Lacsl|mKIAA0837	acyl-CoA synthetase long-chain family member 6	protein-coding
chr11_54287771_54288723	chr11	54287772	54288723	+	0.82927	NA	Intergenic	Intergenic	-15577	NM_001033598	216739	Mm.267478	NM_144823	ENSMUSG00000020333	Acsl6	A330035H04Rik|AW050338|Facl6|LACS|Lacsl|mKIAA0837	acyl-CoA synthetase long-chain family member 6	protein-coding
chr11_54287828_54288253	chr11	54287829	54288253	+	0.666788	NA	Intergenic	Intergenic	-15783	NM_001033598	216739	Mm.267478	NM_144823	ENSMUSG00000020333	Acsl6	A330035H04Rik|AW050338|Facl6|LACS|Lacsl|mKIAA0837	acyl-CoA synthetase long-chain family member 6	protein-coding
chr2_155562834_155563347	chr2	155562835	155563347	+	0.973643	NA	TTS (NM_019811)	TTS (NM_019811)	-6161	NR_040613	74945	Mm.401956	NR_040613	ENSMUSG00000086529	Acss2os	4930471I20Rik	acyl-CoA synthetase short-chain family member 2, opposite strand	ncRNA
chr2_155570697_155571097	chr2	155570698	155571097	+	0.864958	NA	intron (NM_008180, intron 9 of 12)	intron (NM_008180, intron 9 of 12)	-13967	NR_040613	74945	Mm.401956	NR_040613	ENSMUSG00000086529	Acss2os	4930471I20Rik	acyl-CoA synthetase short-chain family member 2, opposite strand	ncRNA
chr2_155562824_155563727	chr2	155562825	155563727	+	0.863848	NA	TTS (NM_019811)	TTS (NM_019811)	-6346	NR_040613	74945	Mm.401956	NR_040613	ENSMUSG00000086529	Acss2os	4930471I20Rik	acyl-CoA synthetase short-chain family member 2, opposite strand	ncRNA
chr5_142930928_142931231	chr5	142930929	142931231	+	1.22666	NA	Intergenic	Intergenic	-24356	NM_007393	11461	Mm.328431	NM_007393	ENSMUSG00000029580	Actb	Actx|E430023M04Rik|beta-actin	actin, beta	protein-coding
chr5_142932075_142932637	chr5	142932076	142932637	+	0.902946	NA	Intergenic	Intergenic	-25632	NM_007393	11461	Mm.328431	NM_007393	ENSMUSG00000029580	Actb	Actx|E430023M04Rik|beta-actin	actin, beta	protein-coding
chr5_142931790_142932652	chr5	142931791	142932652	+	0.890933	NA	Intergenic	B3|SINE|B2	-25497	NM_007393	11461	Mm.328431	NM_007393	ENSMUSG00000029580	Actb	Actx|E430023M04Rik|beta-actin	actin, beta	protein-coding
chr13_111248973_111249667	chr13	111248974	111249667	+	1.97568	NA	Intergenic	Intergenic	-5693	NM_175497	238880	Mm.107293	NM_175497	ENSMUSG00000055194	Actbl2	4732495G21Rik	actin, beta-like 2	protein-coding
chr13_111265620_111266048	chr13	111265621	111266048	+	1.64477	NA	Intergenic	Intergenic	10821	NM_175497	238880	Mm.107293	NM_175497	ENSMUSG00000055194	Actbl2	4732495G21Rik	actin, beta-like 2	protein-coding
chr13_111265283_111266085	chr13	111265284	111266085	+	1.61607	NA	Intergenic	Intergenic	10671	NM_175497	238880	Mm.107293	NM_175497	ENSMUSG00000055194	Actbl2	4732495G21Rik	actin, beta-like 2	protein-coding
chr13_111247535_111247831	chr13	111247536	111247831	+	0.966244	NA	Intergenic	Intergenic	-7330	NM_175497	238880	Mm.107293	NM_175497	ENSMUSG00000055194	Actbl2	4732495G21Rik	actin, beta-like 2	protein-coding
chr13_111258046_111259188	chr13	111258047	111259188	+	0.900289	NA	TTS (NM_175497)	TTS (NM_175497)	3604	NM_175497	238880	Mm.107293	NM_175497	ENSMUSG00000055194	Actbl2	4732495G21Rik	actin, beta-like 2	protein-coding
chr13_111269656_111269969	chr13	111269657	111269969	+	0.772844	NA	Intergenic	Intergenic	14800	NM_175497	238880	Mm.107293	NM_175497	ENSMUSG00000055194	Actbl2	4732495G21Rik	actin, beta-like 2	protein-coding
chr4_56673892_56674222	chr4	56673893	56674222	+	0.705624	NA	Intergenic	Intergenic	67368	NM_025271	11471	Mm.251434	NM_025271	ENSMUSG00000070980	Actl7b	Tact1	actin-like 7b	protein-coding
chr12_80269251_80269656	chr12	80269252	80269656	+	1.1385	NA	Intergenic	ID_B1|SINE|B4	-9083	NM_134156	109711	Mm.253564	NM_134156	ENSMUSG00000015143	Actn1	3110023F10Rik|Actn1a	actinin, alpha 1	protein-coding
chr12_80239951_80240315	chr12	80239952	80240315	+	0.912545	NA	intron (NM_134156, intron 1 of 20)	intron (NM_134156, intron 1 of 20)	20238	NM_134156	109711	Mm.253564	NM_134156	ENSMUSG00000015143	Actn1	3110023F10Rik|Actn1a	actinin, alpha 1	protein-coding
chr12_80269743_80270037	chr12	80269744	80270037	+	0.852227	NA	Intergenic	MTD|LTR|ERVL-MaLR	-9519	NM_134156	109711	Mm.253564	NM_134156	ENSMUSG00000015143	Actn1	3110023F10Rik|Actn1a	actinin, alpha 1	protein-coding
chr7_28930660_28931623	chr7	28930661	28931623	+	1.43394	NA	intron (NM_021895, intron 1 of 20)	intron (NM_021895, intron 1 of 20)	31138	NM_021895	60595	Mm.81144	NM_021895	ENSMUSG00000054808	Actn4	C77391	actinin alpha 4	protein-coding
chr7_28949112_28949770	chr7	28949113	28949770	+	1.36356	NA	intron (NM_021895, intron 1 of 20)	intron (NM_021895, intron 1 of 20)	12839	NM_021895	60595	Mm.81144	NM_021895	ENSMUSG00000054808	Actn4	C77391	actinin alpha 4	protein-coding
chr7_28930611_28931996	chr7	28930612	28931996	+	1.30361	NA	intron (NM_021895, intron 1 of 20)	intron (NM_021895, intron 1 of 20)	30976	NM_021895	60595	Mm.81144	NM_021895	ENSMUSG00000054808	Actn4	C77391	actinin alpha 4	protein-coding
chr7_28945415_28945756	chr7	28945416	28945756	+	0.724715	NA	intron (NM_021895, intron 1 of 20)	intron (NM_021895, intron 1 of 20)	16694	NM_021895	60595	Mm.81144	NM_021895	ENSMUSG00000054808	Actn4	C77391	actinin alpha 4	protein-coding
chr1_125389625_125390412	chr1	125389626	125390412	+	0.789266	NA	Intergenic	Intergenic	45708	NM_023735	74117	Mm.183102	NM_023735	ENSMUSG00000026341	Actr3	1200003A09Rik|Arp3	ARP3 actin-related protein 3	protein-coding
chr1_125389625_125390713	chr1	125389626	125390713	+	0.757472	NA	Intergenic	Intergenic	45558	NM_023735	74117	Mm.183102	NM_023735	ENSMUSG00000026341	Actr3	1200003A09Rik|Arp3	ARP3 actin-related protein 3	protein-coding
chr1_125450273_125450799	chr1	125450274	125450799	+	0.64386	NA	Intergenic	Intergenic	-14809	NM_001205386	74117	Mm.183102	NM_023735	ENSMUSG00000026341	Actr3	1200003A09Rik|Arp3	ARP3 actin-related protein 3	protein-coding
chr2_48327386_48327975	chr2	48327387	48327975	+	0.947252	NA	Intergenic	Intergenic	-486428	NM_007396	11480	Mm.314338	NM_007396	ENSMUSG00000052155	Acvr2a	ActrIIa|Acvr2|TactrII	activin receptor IIA	protein-coding
chr11_30676114_30676543	chr11	30676115	30676543	+	0.787511	NA	Intergenic	MamRep1527|LTR|LTR	-26933	NM_029344	75572	Mm.390319	NM_029344		Acyp2	2310004B09Rik	acylphosphatase 2, muscle type	protein-coding
chr9_70688278_70688605	chr9	70688279	70688605	+	0.939351	NA	intron (NM_007399, intron 1 of 15)	B1_Mur4|SINE|Alu	9441	NM_007399	11487	Mm.3037	NM_007399	ENSMUSG00000054693	Adam10	1700031C13Rik|MADM|kuz|kuzbanian	a disintegrin and metallopeptidase domain 10	protein-coding
chr12_21370353_21370625	chr12	21370354	21370625	+	1.01181	NA	intron (NR_120376, intron 1 of 18)	intron (NR_120376, intron 1 of 18)	3143	NR_102380	11491	Mm.27681	NM_009615	ENSMUSG00000052593	Adam17	CD156b|Tace	a disintegrin and metallopeptidase domain 17	protein-coding
chr11_46073492_46074133	chr11	46073493	46074133	+	0.828233	NA	intron (NM_009616, intron 3 of 22)	MLT1A0|LTR|ERVL-MaLR	17829	NM_001291891	11492	Mm.89940	NM_009616	ENSMUSG00000011256	Adam19	AL024287|Mltnb	a disintegrin and metallopeptidase domain 19 (meltrin beta)	protein-coding
chr5_8374245_8374802	chr5	8374246	8374802	+	0.894187	NA	Intergenic	L1MC|LINE|L1	-6443	NM_001098225	11496	Mm.275895	NM_001007220	ENSMUSG00000040537	Adam22	2900022I03Rik|AI854032|MDC2	a disintegrin and metallopeptidase domain 22	protein-coding
chr3_98187331_98188218	chr3	98187332	98188218	+	1.24598	NA	Intergenic	Lx8|LINE|L1	26963	NM_027665	71078	Mm.50711	NM_027665	ENSMUSG00000043468	Adam30	4933424D07Rik|svph4	a disintegrin and metallopeptidase domain 30	protein-coding
chr3_98187314_98188537	chr3	98187315	98188537	+	1.15457	NA	Intergenic	MER21B|LTR|ERVL	27114	NM_027665	71078	Mm.50711	NM_027665	ENSMUSG00000043468	Adam30	4933424D07Rik|svph4	a disintegrin and metallopeptidase domain 30	protein-coding
chr12_113362283_113363079	chr12	113362284	113363079	+	1.06124	NA	Intergenic	Intergenic	-126884	NM_001009545	238405	Mm.442216	NM_001009545	ENSMUSG00000051804	Adam6b	4930523C11Rik	a disintegrin and metallopeptidase domain 6B	protein-coding
chr12_113462956_113463277	chr12	113462957	113463277	+	0.747041	NA	Intergenic	Intergenic	-26448	NM_001009545	238405	Mm.442216	NM_001009545	ENSMUSG00000051804	Adam6b	4930523C11Rik	a disintegrin and metallopeptidase domain 6B	protein-coding
chr17_33537326_33538049	chr17	33537327	33538049	+	0.746808	NA	intron (NR_037707, intron 7 of 24)	intron (NR_037707, intron 7 of 24)	13492	NR_037708	224697	Mm.29304	NM_172619	ENSMUSG00000024299	Adamts10	9430006O18|AW045948|Adam-ts10|Adamts-10|Znmp	a disintegrin-like and metallopeptidase (reprolysin type) with thrombospondin type 1 motif, 10	protein-coding
chr10_61281106_61281593	chr10	61281107	61281593	+	0.649544	NA	Intergenic	Intergenic	-7912	NM_001081127	237360	Mm.333252	NM_001081127	ENSMUSG00000059901	Adamts14	Adamts-14|TS14	a disintegrin-like and metallopeptidase (reprolysin type) with thrombospondin type 1 motif, 14	protein-coding
chr5_89812497_89813094	chr5	89812498	89813094	+	0.820409	NA	intron (NM_177872, intron 3 of 21)	Lx7|LINE|L1	70538	NM_177872	330119	Mm.133062	NM_177872	ENSMUSG00000043635	Adamts3	1100001H14Rik|6330442E02Rik	a disintegrin-like and metallopeptidase (reprolysin type) with thrombospondin type 1 motif, 3	protein-coding
chr13_104259001_104259310	chr13	104259002	104259310	+	0.741582	NA	Intergenic	MTE-int|LTR|ERVL-MaLR	-28717	NM_001081020	108154	Mm.208125	NM_175496	ENSMUSG00000046169	Adamts6	5031426K13|A930019D11Rik|ADAM-TS6|b2b1879.1Clo|b2b2029Clo|b2b2182Clo|b2b2187.1Clo|b2b2228Clo	a disintegrin-like and metallopeptidase (reprolysin type) with thrombospondin type 1 motif, 6	protein-coding
chr9_90165118_90165609	chr9	90165119	90165609	+	0.799972	NA	intron (NM_001003911, intron 1 of 23)	intron (NM_001003911, intron 1 of 23)	2386	NM_001003911	108153	Mm.102141	NM_001003911	ENSMUSG00000032363	Adamts7	ADAM-TS7|ADAMTS7B	a disintegrin-like and metallopeptidase (reprolysin type) with thrombospondin type 1 motif, 7	protein-coding
chr5_139300379_139300897	chr5	139300380	139300897	+	1.00651	NA	intron (NM_172723, intron 3 of 10)	intron (NM_172723, intron 3 of 10)	24826	NM_172723	231821	Mm.297819	NM_172723	ENSMUSG00000056413	Adap1	4930431P11Rik|Centa1|GC1L|p42IP4	ArfGAP with dual PH domains 1	protein-coding
chr3_89686009_89686504	chr3	89686010	89686504	+	1.07894	NA	Intergenic	Intergenic	-28765	NM_001038587	56417	Mm.316628	NM_019655	ENSMUSG00000027951	Adar	AV242451|Adar1|Adar1p110|Adar1p150|mZaADAR	adenosine deaminase, RNA-specific	protein-coding
chr10_77387273_77387979	chr10	77387274	77387979	+	1.03928	NA	intron (NR_004429, intron 1 of 10)	intron (NR_004429, intron 1 of 10)	30647	NM_130895	110532	Mm.276815	NM_130895	ENSMUSG00000020262	Adarb1	1700057H01Rik|AW124433|AW558573|Adar2|BB220382|D10Bwg0447e|Red1	adenosine deaminase, RNA-specific, B1	protein-coding
chr10_77366842_77367640	chr10	77366843	77367640	+	0.743264	NA	intron (NR_004429, intron 1 of 10)	intron (NR_004429, intron 1 of 10)	51032	NM_130895	110532	Mm.276815	NM_130895	ENSMUSG00000020262	Adarb1	1700057H01Rik|AW124433|AW558573|Adar2|BB220382|D10Bwg0447e|Red1	adenosine deaminase, RNA-specific, B1	protein-coding
chr10_77366540_77366777	chr10	77366541	77366777	+	0.738887	NA	intron (NR_004429, intron 1 of 10)	(TGG)n|Simple_repeat|Simple_repeat	51614	NM_130895	110532	Mm.276815	NM_130895	ENSMUSG00000020262	Adarb1	1700057H01Rik|AW124433|AW558573|Adar2|BB220382|D10Bwg0447e|Red1	adenosine deaminase, RNA-specific, B1	protein-coding
chr10_77415890_77416103	chr10	77415891	77416103	+	0.734715	NA	intron (NR_004429, intron 1 of 10)	intron (NR_004429, intron 1 of 10)	2276	NM_130895	110532	Mm.276815	NM_130895	ENSMUSG00000020262	Adarb1	1700057H01Rik|AW124433|AW558573|Adar2|BB220382|D10Bwg0447e|Red1	adenosine deaminase, RNA-specific, B1	protein-coding
chr13_8479024_8479611	chr13	8479025	8479611	+	1.04308	NA	intron (NM_001289530, intron 1 of 9)	intron (NM_001289530, intron 1 of 9)	276452	NM_052977	94191	Mm.425794	NM_052977	ENSMUSG00000052551	Adarb2	Adar3|RED2	adenosine deaminase, RNA-specific, B2	protein-coding
chr13_8480294_8480761	chr13	8480295	8480761	+	0.998946	NA	intron (NM_001289530, intron 1 of 9)	intron (NM_001289530, intron 1 of 9)	277662	NM_052977	94191	Mm.425794	NM_052977	ENSMUSG00000052551	Adarb2	Adar3|RED2	adenosine deaminase, RNA-specific, B2	protein-coding
chr13_8479877_8480767	chr13	8479878	8480767	+	0.974543	NA	intron (NM_001289530, intron 1 of 9)	intron (NM_001289530, intron 1 of 9)	277456	NM_052977	94191	Mm.425794	NM_052977	ENSMUSG00000052551	Adarb2	Adar3|RED2	adenosine deaminase, RNA-specific, B2	protein-coding
chr1_180199153_180199902	chr1	180199154	180199902	+	0.917231	NA	Intergenic	L2a|LINE|L2	-3508	NM_023341	67426	Mm.38330	NM_023341	ENSMUSG00000026489	Adck3	4632432J16Rik|AI462003|Cabc1|mKIAA0451	aarF domain containing kinase 3	protein-coding
chr15_98617183_98617937	chr15	98617184	98617937	+	0.841162	NA	Intergenic	Intergenic	-9927	NM_007405	11512	Mm.157091	NM_007405	ENSMUSG00000022994	Adcy6	AC6|mKIAA0422	adenylate cyclase 6	protein-coding
chr8_88297912_88298417	chr8	88297913	88298417	+	0.885008	NA	intron (NM_001037723, intron 3 of 27)	intron (NM_001037723, intron 3 of 27)	3961	NM_001037724	11513	Mm.288206	NM_007406	ENSMUSG00000031659	Adcy7	AA407758	adenylate cyclase 7	protein-coding
chr8_88297898_88298592	chr8	88297899	88298592	+	0.855069	NA	intron (NM_001037723, intron 3 of 27)	intron (NM_001037723, intron 3 of 27)	4041	NM_001037724	11513	Mm.288206	NM_007406	ENSMUSG00000031659	Adcy7	AA407758	adenylate cyclase 7	protein-coding
chr8_88268396_88268714	chr8	88268397	88268714	+	0.74691	NA	Intergenic	MTEa|LTR|ERVL-MaLR	-3848	NM_007406	11513	Mm.288206	NM_007406	ENSMUSG00000031659	Adcy7	AA407758	adenylate cyclase 7	protein-coding
chr16_4469625_4470300	chr16	4469626	4470300	+	0.631395	NA	Intergenic	Intergenic	-49465	NM_009624	11515	Mm.439750	NM_009624	ENSMUSG00000005580	Adcy9	ACtp10|AW125421|D16Wsu65e|mKIAA0520	adenylate cyclase 9	protein-coding
chr19_53199336_53199756	chr19	53199337	53199756	+	1.06548	NA	intron (NM_013758, intron 1 of 15)	intron (NM_013758, intron 1 of 15)	55549	NM_013758	27360	Mm.426080	NM_013758	ENSMUSG00000025026	Add3	AI463285|R75380	adducin 3 (gamma)	protein-coding
chr19_53192232_53192416	chr19	53192233	53192416	+	0.889327	NA	intron (NM_013758, intron 1 of 15)	intron (NM_013758, intron 1 of 15)	48327	NM_013758	27360	Mm.426080	NM_013758	ENSMUSG00000025026	Add3	AI463285|R75380	adducin 3 (gamma)	protein-coding
chr10_10224674_10224888	chr10	10224675	10224888	+	0.937673	NA	Intergenic	RMER3D-int|LTR|ERVK	247533	NM_001127353	215772	Mm.246573	NM_172547	ENSMUSG00000050994	Adgb	9130014G24Rik	androglobin	protein-coding
chr10_10224617_10225144	chr10	10224618	10225144	+	0.849463	NA	Intergenic	RMER3D-int|LTR|ERVK	247433	NM_001127353	215772	Mm.246573	NM_172547	ENSMUSG00000050994	Adgb	9130014G24Rik	androglobin	protein-coding
chr3_138420457_138420973	chr3	138420458	138420973	+	2.09405	NA	intron (NM_011996, intron 4 of 8)	intron (NM_011996, intron 4 of 8)	5218	NM_011996	26876	Mm.158750	NM_011996	ENSMUSG00000037797	Adh4	Adh2	alcohol dehydrogenase 4 (class II), pi polypeptide	protein-coding
chr3_138423633_138423923	chr3	138423634	138423923	+	1.67859	NA	intron (NM_011996, intron 5 of 8)	intron (NM_011996, intron 5 of 8)	8281	NM_011996	26876	Mm.158750	NM_011996	ENSMUSG00000037797	Adh4	Adh2	alcohol dehydrogenase 4 (class II), pi polypeptide	protein-coding
chr3_138423606_138424048	chr3	138423607	138424048	+	1.43865	NA	intron (NM_011996, intron 5 of 8)	intron (NM_011996, intron 5 of 8)	8330	NM_011996	26876	Mm.158750	NM_011996	ENSMUSG00000037797	Adh4	Adh2	alcohol dehydrogenase 4 (class II), pi polypeptide	protein-coding
chr3_138420127_138420389	chr3	138420128	138420389	+	1.36205	NA	intron (NM_011996, intron 3 of 8)	intron (NM_011996, intron 3 of 8)	4761	NM_011996	26876	Mm.158750	NM_011996	ENSMUSG00000037797	Adh4	Adh2	alcohol dehydrogenase 4 (class II), pi polypeptide	protein-coding
chr3_138419506_138419894	chr3	138419507	138419894	+	1.03332	NA	intron (NM_011996, intron 3 of 8)	intron (NM_011996, intron 3 of 8)	4203	NM_011996	26876	Mm.158750	NM_011996	ENSMUSG00000037797	Adh4	Adh2	alcohol dehydrogenase 4 (class II), pi polypeptide	protein-coding
chr1_9548718_9548970	chr1	9548719	9548970	+	1.07305	NA	intron (NR_027664, intron 1 of 12)	intron (NR_027664, intron 1 of 12)	798	NR_027664	76187	Mm.28514	NM_175236	ENSMUSG00000025911	Adhfe1	6330565B14Rik|AI043035|Adh8	alcohol dehydrogenase, iron containing, 1	protein-coding
chr6_119390692_119391011	chr6	119390693	119391011	+	0.963076	NA	intron (NM_197985, intron 1 of 7)	intron (NM_197985, intron 1 of 7)	26631	NM_197985	68465	Mm.291826	NM_197985	ENSMUSG00000030168	Adipor2	1110001I14Rik|ADCR2|AI115388|AW554121|D6Ucla1e|Paqr2	adiponectin receptor 2	protein-coding
chr6_119384809_119385108	chr6	119384810	119385108	+	0.737811	NA	intron (NM_197985, intron 1 of 7)	B4|SINE|B4	32524	NM_197985	68465	Mm.291826	NM_197985	ENSMUSG00000030168	Adipor2	1110001I14Rik|ADCR2|AI115388|AW554121|D6Ucla1e|Paqr2	adiponectin receptor 2	protein-coding
chr2_168197501_168197958	chr2	168197502	168197958	+	1.22734	NA	intron (NM_009628, intron 1 of 3)	intron (NM_009628, intron 1 of 3)	9332	NM_009628	11538	Mm.201322	NM_009628	ENSMUSG00000051149	Adnp	AA589558|mKIAA0784	activity-dependent neuroprotective protein	protein-coding
chr2_168191858_168192183	chr2	168191859	168192183	+	0.860031	NA	intron (NM_009628, intron 1 of 3)	B1_Mur1|SINE|Alu	15041	NM_009628	11538	Mm.201322	NM_009628	ENSMUSG00000051149	Adnp	AA589558|mKIAA0784	activity-dependent neuroprotective protein	protein-coding
chr10_67655539_67656143	chr10	67655540	67656143	+	1.32273	NA	Intergenic	Intergenic	-106886	NM_001005419	211488	Mm.297250	NM_001005419	ENSMUSG00000057134	Ado	Gm237	2-aminoethanethiol (cysteamine) dioxygenase	protein-coding
chr10_67717411_67718224	chr10	67717412	67718224	+	1.14773	NA	Intergenic	Intergenic	-168863	NM_001005419	211488	Mm.297250	NM_001005419	ENSMUSG00000057134	Ado	Gm237	2-aminoethanethiol (cysteamine) dioxygenase	protein-coding
chr10_67646635_67647026	chr10	67646636	67647026	+	1.11469	NA	Intergenic	Intergenic	-97876	NM_001005419	211488	Mm.297250	NM_001005419	ENSMUSG00000057134	Ado	Gm237	2-aminoethanethiol (cysteamine) dioxygenase	protein-coding
chr10_67651431_67651949	chr10	67651432	67651949	+	1.10325	NA	Intergenic	Intergenic	-102735	NM_001005419	211488	Mm.297250	NM_001005419	ENSMUSG00000057134	Ado	Gm237	2-aminoethanethiol (cysteamine) dioxygenase	protein-coding
chr10_67657734_67658508	chr10	67657735	67658508	+	1.05672	NA	Intergenic	Intergenic	-109166	NM_001005419	211488	Mm.297250	NM_001005419	ENSMUSG00000057134	Ado	Gm237	2-aminoethanethiol (cysteamine) dioxygenase	protein-coding
chr10_67598487_67599251	chr10	67598488	67599251	+	1.04669	NA	Intergenic	Intergenic	-49914	NM_001005419	211488	Mm.297250	NM_001005419	ENSMUSG00000057134	Ado	Gm237	2-aminoethanethiol (cysteamine) dioxygenase	protein-coding
chr10_67696351_67696818	chr10	67696352	67696818	+	1.02746	NA	Intergenic	Intergenic	-147630	NM_001005419	211488	Mm.297250	NM_001005419	ENSMUSG00000057134	Ado	Gm237	2-aminoethanethiol (cysteamine) dioxygenase	protein-coding
chr10_67651646_67651942	chr10	67651647	67651942	+	1.02308	NA	Intergenic	Intergenic	-102839	NM_001005419	211488	Mm.297250	NM_001005419	ENSMUSG00000057134	Ado	Gm237	2-aminoethanethiol (cysteamine) dioxygenase	protein-coding
chr10_67696028_67696847	chr10	67696029	67696847	+	1.0007	NA	Intergenic	Intergenic	-147483	NM_001005419	211488	Mm.297250	NM_001005419	ENSMUSG00000057134	Ado	Gm237	2-aminoethanethiol (cysteamine) dioxygenase	protein-coding
chr10_67606852_67607064	chr10	67606853	67607064	+	0.643012	NA	Intergenic	Intergenic	-58003	NM_001005419	211488	Mm.297250	NM_001005419	ENSMUSG00000057134	Ado	Gm237	2-aminoethanethiol (cysteamine) dioxygenase	protein-coding
chr10_75289778_75290222	chr10	75289779	75290222	+	0.857796	NA	intron (NM_153406, intron 13 of 15)	intron (NM_153406, intron 13 of 15)	-26877	NM_009630	11540	Mm.333734	NM_009630	ENSMUSG00000020178	Adora2a	A2AAR|A2aR|AA2AR	adenosine A2a receptor	protein-coding
chr11_62184925_62185486	chr11	62184926	62185486	+	1.66923	NA	intron (NM_001281818, intron 12 of 14)	intron (NM_001281818, intron 12 of 14)	-63778	NM_007413	11541	Mm.40740	NM_007413	ENSMUSG00000018500	Adora2b	A2BAR|A2BR|A2b|AA2BR|AI480866|AI605384	adenosine A2b receptor	protein-coding
chr11_62223798_62224479	chr11	62223799	62224479	+	1.01939	NA	Intergenic	MLT1A0|LTR|ERVL-MaLR	-24845	NM_007413	11541	Mm.40740	NM_007413	ENSMUSG00000018500	Adora2b	A2BAR|A2BR|A2b|AA2BR|AI480866|AI605384	adenosine A2b receptor	protein-coding
chr11_62186633_62187574	chr11	62186634	62187574	+	0.942622	NA	intron (NM_001281818, intron 12 of 14)	intron (NM_001281818, intron 12 of 14)	-61880	NM_007413	11541	Mm.40740	NM_007413	ENSMUSG00000018500	Adora2b	A2BAR|A2BR|A2b|AA2BR|AI480866|AI605384	adenosine A2b receptor	protein-coding
chr11_62217585_62218160	chr11	62217586	62218160	+	0.824	NA	intron (NM_001281818, intron 14 of 14)	intron (NM_001281818, intron 14 of 14)	-31111	NM_007413	11541	Mm.40740	NM_007413	ENSMUSG00000018500	Adora2b	A2BAR|A2BR|A2b|AA2BR|AI480866|AI605384	adenosine A2b receptor	protein-coding
chr9_59308276_59309044	chr9	59308277	59309044	+	0.703216	NA	intron (NM_028121, intron 3 of 6)	intron (NM_028121, intron 3 of 6)	17088	NM_028121	72141	Mm.22456	NM_028121	ENSMUSG00000025236	Adpgk	2610017G09Rik|Adp-gk|C77577	ADP-dependent glucokinase	protein-coding
chr16_38449788_38450143	chr16	38449789	38450143	+	1.24962	NA	intron (NM_007414, intron 2 of 3)	PB1D9|SINE|Alu	2723	NM_007414	11544	Mm.20047	NM_007414	ENSMUSG00000002844	Adprh	Arh1	ADP-ribosylarginine hydrolase	protein-coding
chr8_13263231_13263775	chr8	13263232	13263775	+	1.20481	NA	intron (NM_001024504, intron 4 of 6)	intron (NM_001024504, intron 4 of 6)	-9341	NM_172750	234072	Mm.132785	NM_172750	ENSMUSG00000031448	Adprhl1	Arh2|D330008N11Rik	ADP-ribosylhydrolase like 1	protein-coding
chr11_67048522_67049098	chr11	67048523	67049098	+	1.50573	NA	intron (NM_025510, intron 2 of 4)	intron (NM_025510, intron 2 of 4)	3808	NM_025510	66358	Mm.22511	NM_025510	ENSMUSG00000020910	Adprm	2310004I24Rik|MDS006	ADP-ribose/CDP-alcohol diphosphatase, manganese dependent	protein-coding
chr11_67049277_67049574	chr11	67049278	67049574	+	0.856823	NA	intron (NM_025510, intron 2 of 4)	B3A|SINE|B2	3192	NM_025510	66358	Mm.22511	NM_025510	ENSMUSG00000020910	Adprm	2310004I24Rik|MDS006	ADP-ribose/CDP-alcohol diphosphatase, manganese dependent	protein-coding
chr18_62162972_62163435	chr18	62162973	62163435	+	1.15998	NA	Intergenic	Intergenic	16777	NM_007420	11555	Mm.5598	NM_007420	ENSMUSG00000045730	Adrb2	Adrb-2|Badm|Gpcr7	adrenergic receptor, beta 2	protein-coding
chr18_62169160_62169562	chr18	62169161	62169562	+	1.08526	NA	Intergenic	Intergenic	10620	NM_007420	11555	Mm.5598	NM_007420	ENSMUSG00000045730	Adrb2	Adrb-2|Badm|Gpcr7	adrenergic receptor, beta 2	protein-coding
chr18_62169022_62169737	chr18	62169023	62169737	+	1.02332	NA	Intergenic	Intergenic	10601	NM_007420	11555	Mm.5598	NM_007420	ENSMUSG00000045730	Adrb2	Adrb-2|Badm|Gpcr7	adrenergic receptor, beta 2	protein-coding
chr18_62122275_62122752	chr18	62122276	62122752	+	0.646261	NA	Intergenic	L1ME3A|LINE|L1	57467	NM_007420	11555	Mm.5598	NM_007420	ENSMUSG00000045730	Adrb2	Adrb-2|Badm|Gpcr7	adrenergic receptor, beta 2	protein-coding
chr19_4300884_4301058	chr19	4300885	4301058	+	0.902639	NA	intron (NM_001290818, intron 1 of 20)	intron (NM_001290818, intron 1 of 20)	5251	NM_130863	110355	Mm.254144	NM_130863	ENSMUSG00000024858	Adrbk1	Adrbk-1|Bark-1|GRK2|beta ARK|betaARK1	adrenergic receptor kinase, beta 1	protein-coding
chr1_177792915_177793531	chr1	177792916	177793531	+	1.05755	NA	intron (NM_007422, intron 1 of 12)	intron (NM_007422, intron 1 of 12)	3286	NM_007422	11566	Mm.338021	NM_007422	ENSMUSG00000015961	Adss	AI314886|AS|Adss2	adenylosuccinate synthetase, non muscle	protein-coding
chr12_112617190_112617598	chr12	112617191	112617598	+	0.760164	NA	Intergenic	Intergenic	-2653	NM_007421	11565	Mm.3440	NM_007421	ENSMUSG00000011148	Adssl1	AI528595|Adss|Adss1	adenylosuccinate synthetase like 1	protein-coding
chr13_41761911_41762355	chr13	41761912	41762355	+	0.894739	NA	Intergenic	Intergenic	85355	NM_175417	109254	Mm.25195	NM_175417	ENSMUSG00000058022	Adtrp	9530008L14Rik	androgen dependent TFPI regulating protein	protein-coding
chr13_41824101_41824766	chr13	41824102	41824766	+	0.814854	NA	intron (NM_175417, intron 2 of 6)	intron (NM_175417, intron 2 of 6)	23054	NM_175417	109254	Mm.25195	NM_175417	ENSMUSG00000058022	Adtrp	9530008L14Rik	androgen dependent TFPI regulating protein	protein-coding
chr13_41803913_41804271	chr13	41803914	41804271	+	0.687544	NA	intron (NM_175417, intron 4 of 6)	intron (NM_175417, intron 4 of 6)	43396	NM_175417	109254	Mm.25195	NM_175417	ENSMUSG00000058022	Adtrp	9530008L14Rik	androgen dependent TFPI regulating protein	protein-coding
chr6_140620575_140621259	chr6	140620576	140621259	+	1.4027	NA	Intergenic	LTR88b|LTR|Gypsy?	-1746	NM_178803	11569	Mm.86453	NM_009637	ENSMUSG00000030232	Aebp2	AU023766|B230313N05Rik	AE binding protein 2	protein-coding
chr6_140613614_140614177	chr6	140613615	140614177	+	1.30885	NA	Intergenic	RMER15|LTR|ERVL	-8767	NM_178803	11569	Mm.86453	NM_009637	ENSMUSG00000030232	Aebp2	AU023766|B230313N05Rik	AE binding protein 2	protein-coding
chr6_140722553_140723300	chr6	140722554	140723300	+	0.888875	NA	Intergenic	Intergenic	98629	NM_009637	11569	Mm.86453	NM_009637	ENSMUSG00000030232	Aebp2	AU023766|B230313N05Rik	AE binding protein 2	protein-coding
chr6_140801073_140801486	chr6	140801074	140801486	+	0.825666	NA	Intergenic	Intergenic	176982	NM_009637	11569	Mm.86453	NM_009637	ENSMUSG00000030232	Aebp2	AU023766|B230313N05Rik	AE binding protein 2	protein-coding
chr6_140750307_140750722	chr6	140750308	140750722	+	0.811289	NA	Intergenic	Intergenic	126217	NM_009637	11569	Mm.86453	NM_009637	ENSMUSG00000030232	Aebp2	AU023766|B230313N05Rik	AE binding protein 2	protein-coding
chr6_140661920_140662318	chr6	140661921	140662318	+	0.705202	NA	intron (NM_009637, intron 8 of 8)	MTEa|LTR|ERVL-MaLR	37821	NM_009637	11569	Mm.86453	NM_009637	ENSMUSG00000030232	Aebp2	AU023766|B230313N05Rik	AE binding protein 2	protein-coding
chr6_140598517_140599330	chr6	140598518	140599330	+	0.663854	NA	Intergenic	B3A|SINE|B2	-23739	NM_178803	11569	Mm.86453	NM_009637	ENSMUSG00000030232	Aebp2	AU023766|B230313N05Rik	AE binding protein 2	protein-coding
chr6_140598523_140598960	chr6	140598524	140598960	+	0.641514	NA	Intergenic	Intergenic	-23921	NM_178803	11569	Mm.86453	NM_009637	ENSMUSG00000030232	Aebp2	AU023766|B230313N05Rik	AE binding protein 2	protein-coding
chr18_61834690_61835343	chr18	61834691	61835343	+	0.914505	NA	intron (NM_001164491, intron 8 of 23)	intron (NM_001164491, intron 8 of 23)	-48355	NM_178928	106877	Mm.26632	NM_178928	ENSMUSG00000033032	Afap1l1	AI173486	actin filament associated protein 1-like 1	protein-coding
chr19_57014828_57015150	chr19	57014829	57015150	+	1.09335	NA	Intergenic	Intergenic	-6414	NM_001177797	226250	Mm.226284	NM_146102	ENSMUSG00000025083	Afap1l2	AU041783|C86904|mKIAA1914	actin filament associated protein 1-like 2	protein-coding
chr19_57055556_57056168	chr19	57055557	57056168	+	0.847805	NA	intron (NM_001290813, intron 12 of 20)	URR1B|DNA|hAT-Charlie	-47287	NM_001177797	226250	Mm.226284	NM_146102	ENSMUSG00000025083	Afap1l2	AU041783|C86904|mKIAA1914	actin filament associated protein 1-like 2	protein-coding
chr19_57013196_57013818	chr19	57013197	57013818	+	0.82227	NA	Intergenic	Intergenic	-4932	NM_001177797	226250	Mm.226284	NM_146102	ENSMUSG00000025083	Afap1l2	AU041783|C86904|mKIAA1914	actin filament associated protein 1-like 2	protein-coding
chr5_103806114_103806688	chr5	103806115	103806688	+	0.753475	NA	intron (NM_133919, intron 3 of 19)	intron (NM_133919, intron 3 of 19)	51828	NM_001080798	17355	Mm.6949	NM_133919	ENSMUSG00000029313	Aff1	9630032B01Rik|AW319193|Af4|Mllt2h|Rob	AF4/FMR2 family, member 1	protein-coding
chr1_38647267_38647879	chr1	38647268	38647879	+	1.43828	NA	Intergenic	Intergenic	-20329	NM_001290814	16764	Mm.336679	NM_010678	ENSMUSG00000037138	Aff3	3222402O04Rik|A730046J16|LAF-4|Laf4	AF4/FMR2 family, member 3	protein-coding
chr1_38723306_38724277	chr1	38723307	38724277	+	1.39468	NA	Intergenic	MER74A|LTR|ERVL	-96548	NM_001290814	16764	Mm.336679	NM_010678	ENSMUSG00000037138	Aff3	3222402O04Rik|A730046J16|LAF-4|Laf4	AF4/FMR2 family, member 3	protein-coding
chr1_38658395_38658731	chr1	38658396	38658731	+	1.25292	NA	Intergenic	Intergenic	-31319	NM_001290814	16764	Mm.336679	NM_010678	ENSMUSG00000037138	Aff3	3222402O04Rik|A730046J16|LAF-4|Laf4	AF4/FMR2 family, member 3	protein-coding
chr1_38437729_38438153	chr1	38437730	38438153	+	1.17532	NA	intron (NM_001290814, intron 4 of 21)	intron (NM_001290814, intron 4 of 21)	189303	NM_001290814	16764	Mm.336679	NM_010678	ENSMUSG00000037138	Aff3	3222402O04Rik|A730046J16|LAF-4|Laf4	AF4/FMR2 family, member 3	protein-coding
chr1_38597507_38598140	chr1	38597508	38598140	+	0.776099	NA	intron (NM_001290814, intron 1 of 21)	intron (NM_001290814, intron 1 of 21)	29420	NM_001290814	16764	Mm.336679	NM_010678	ENSMUSG00000037138	Aff3	3222402O04Rik|A730046J16|LAF-4|Laf4	AF4/FMR2 family, member 3	protein-coding
chr8_123478626_123479279	chr8	123478627	123479279	+	0.856835	NA	intron (NM_054070, intron 1 of 16)	intron (NM_054070, intron 1 of 16)	1091	NR_028260	114896	Mm.287475	NM_054070	ENSMUSG00000031967	Afg3l1	1700047G05Rik|3110061K15Rik	AFG3-like AAA ATPase 1	protein-coding
chr8_123478875_123479273	chr8	123478876	123479273	+	0.829504	NA	intron (NM_054070, intron 1 of 16)	intron (NM_054070, intron 1 of 16)	1212	NR_028260	114896	Mm.287475	NM_054070	ENSMUSG00000031967	Afg3l1	1700047G05Rik|3110061K15Rik	AFG3-like AAA ATPase 1	protein-coding
chr5_90504687_90505226	chr5	90504688	90505226	+	0.822644	NA	exon (NM_007423, exon 11 of 15)	exon (NM_007423, exon 11 of 15)	-13992	NM_145146	280662	Mm.348786	NM_145146	ENSMUSG00000029369	Afm	Alf|alpha-Alb	afamin	protein-coding
chr5_90512332_90512596	chr5	90512333	90512596	+	0.760095	NA	Intergenic	Intergenic	-6485	NM_145146	280662	Mm.348786	NM_145146	ENSMUSG00000029369	Afm	Alf|alpha-Alb	afamin	protein-coding
chr5_90512318_90512793	chr5	90512319	90512793	+	0.733975	NA	Intergenic	Intergenic	-6393	NM_145146	280662	Mm.348786	NM_145146	ENSMUSG00000029369	Afm	Alf|alpha-Alb	afamin	protein-coding
chr11_117825360_117826013	chr11	117825361	117826013	+	0.684907	NA	promoter-TSS (NM_027827)	promoter-TSS (NM_027827)	-232	NM_027827	71562	Mm.273958	NM_027827	ENSMUSG00000017718	Afmid	9030621K19Rik|Ammd|FKF|KFA|Kf|formylase	arylformamidase	protein-coding
chr11_20743400_20743672	chr11	20743401	20743672	+	0.658906	NA	Intergenic	Intergenic	-1980	NM_181411	216549	Mm.356580	NM_181411	ENSMUSG00000049659	Aftph	-	aftiphilin	protein-coding
chr7_76407884_76408603	chr7	76407885	76408603	+	1.35595	NA	intron (NM_001199224, intron 6 of 22)	RMER15|LTR|ERVL	178357	NM_001199224	244071	Mm.322829	NM_172902	ENSMUSG00000025754	Agbl1	Ccp4|D430020F16|EG244071|Nna1-l1	ATP/GTP binding protein-like 1	protein-coding
chr7_76146277_76146771	chr7	76146278	76146771	+	1.19941	NA	Intergenic	Intergenic	-83363	NM_001199224	244071	Mm.322829	NM_172902	ENSMUSG00000025754	Agbl1	Ccp4|D430020F16|EG244071|Nna1-l1	ATP/GTP binding protein-like 1	protein-coding
chr7_76142346_76142858	chr7	76142347	76142858	+	0.910025	NA	Intergenic	Intergenic	-87285	NM_001199224	244071	Mm.322829	NM_172902	ENSMUSG00000025754	Agbl1	Ccp4|D430020F16|EG244071|Nna1-l1	ATP/GTP binding protein-like 1	protein-coding
chr7_76047694_76048286	chr7	76047695	76048286	+	0.861773	NA	Intergenic	Intergenic	-181897	NM_001199224	244071	Mm.322829	NM_172902	ENSMUSG00000025754	Agbl1	Ccp4|D430020F16|EG244071|Nna1-l1	ATP/GTP binding protein-like 1	protein-coding
chr1_82879187_82879600	chr1	82879188	82879600	+	1.452	NA	intron (NM_010472, intron 5 of 12)	B4A|SINE|B4	39911	NM_010472	15463	Mm.392569	NM_010472	ENSMUSG00000026159	Agfg1	AU045498|C130049H11Rik|C85612|D730048C23Rik|Hrb|RAB|Rip	ArfGAP with FG repeats 1	protein-coding
chr1_82869235_82870086	chr1	82869236	82870086	+	1.36006	NA	intron (NM_010472, intron 2 of 12)	L1M5|LINE|L1	30178	NM_010472	15463	Mm.392569	NM_010472	ENSMUSG00000026159	Agfg1	AU045498|C130049H11Rik|C85612|D730048C23Rik|Hrb|RAB|Rip	ArfGAP with FG repeats 1	protein-coding
chr1_82831527_82832251	chr1	82831528	82832251	+	1.01169	NA	Intergenic	Intergenic	-7594	NM_010472	15463	Mm.392569	NM_010472	ENSMUSG00000026159	Agfg1	AU045498|C130049H11Rik|C85612|D730048C23Rik|Hrb|RAB|Rip	ArfGAP with FG repeats 1	protein-coding
chr1_82834525_82834910	chr1	82834526	82834910	+	0.856004	NA	Intergenic	Intergenic	-4765	NM_010472	15463	Mm.392569	NM_010472	ENSMUSG00000026159	Agfg1	AU045498|C130049H11Rik|C85612|D730048C23Rik|Hrb|RAB|Rip	ArfGAP with FG repeats 1	protein-coding
chr1_82849799_82850092	chr1	82849800	82850092	+	0.833629	NA	intron (NM_010472, intron 1 of 12)	B2_Mm2|SINE|B2	10463	NM_010472	15463	Mm.392569	NM_010472	ENSMUSG00000026159	Agfg1	AU045498|C130049H11Rik|C85612|D730048C23Rik|Hrb|RAB|Rip	ArfGAP with FG repeats 1	protein-coding
chr1_82820174_82820473	chr1	82820175	82820473	+	0.645604	NA	Intergenic	Intergenic	-19159	NM_010472	15463	Mm.392569	NM_010472	ENSMUSG00000026159	Agfg1	AU045498|C130049H11Rik|C85612|D730048C23Rik|Hrb|RAB|Rip	ArfGAP with FG repeats 1	protein-coding
chr5_137671687_137672340	chr5	137671688	137672340	+	0.940997	NA	intron (NM_145566, intron 1 of 4)	intron (NM_145566, intron 1 of 4)	12603	NM_178162	231801	Mm.260869	NM_145566	ENSMUSG00000029722	Agfg2	A630095P14Rik|Hrbl|RABR	ArfGAP with FG repeats 2	protein-coding
chr4_141766075_141766751	chr4	141766076	141766751	+	0.74366	NA	intron (NM_172338, intron 13 of 14)	intron (NM_172338, intron 13 of 14)	19738	NM_001081408	75986	Mm.30032	NM_001081408	ENSMUSG00000040706	Agmat	5033405N08Rik	agmatine ureohydrolase (agmatinase)	protein-coding
chr15_73155365_73155701	chr15	73155366	73155701	+	1.1142	NA	intron (NM_153178, intron 1 of 18)	intron (NM_153178, intron 1 of 18)	29414	NM_153178	239528	Mm.23095	NM_153178		Ago2	1110029L17Rik|2310051F07Rik|AI225898|AL022874|AW546247|ENSMUSG00000072493|Eif2c2|Gerp95|Gm10365|mKIAA4215	argonaute RISC catalytic subunit 2	protein-coding
chr15_73169766_73170340	chr15	73169767	73170340	+	1.00957	NA	intron (NM_153178, intron 1 of 18)	ID|SINE|ID	14894	NM_153178	239528	Mm.23095	NM_153178		Ago2	1110029L17Rik|2310051F07Rik|AI225898|AL022874|AW546247|ENSMUSG00000072493|Eif2c2|Gerp95|Gm10365|mKIAA4215	argonaute RISC catalytic subunit 2	protein-coding
chr15_73265342_73265657	chr15	73265343	73265657	+	0.957772	NA	intron (NM_007982, intron 18 of 31)	intron (NM_007982, intron 18 of 31)	-80553	NM_153178	239528	Mm.23095	NM_153178		Ago2	1110029L17Rik|2310051F07Rik|AI225898|AL022874|AW546247|ENSMUSG00000072493|Eif2c2|Gerp95|Gm10365|mKIAA4215	argonaute RISC catalytic subunit 2	protein-coding
chr15_73169756_73170917	chr15	73169757	73170917	+	0.871338	NA	intron (NM_153178, intron 1 of 18)	B1_Mm|SINE|Alu	14610	NM_153178	239528	Mm.23095	NM_153178		Ago2	1110029L17Rik|2310051F07Rik|AI225898|AL022874|AW546247|ENSMUSG00000072493|Eif2c2|Gerp95|Gm10365|mKIAA4215	argonaute RISC catalytic subunit 2	protein-coding
chr15_73170536_73170816	chr15	73170537	73170816	+	0.731265	NA	intron (NM_153178, intron 1 of 18)	intron (NM_153178, intron 1 of 18)	14271	NM_153178	239528	Mm.23095	NM_153178		Ago2	1110029L17Rik|2310051F07Rik|AI225898|AL022874|AW546247|ENSMUSG00000072493|Eif2c2|Gerp95|Gm10365|mKIAA4215	argonaute RISC catalytic subunit 2	protein-coding
chr15_73170393_73170917	chr15	73170394	73170917	+	0.682286	NA	intron (NM_153178, intron 1 of 18)	intron (NM_153178, intron 1 of 18)	14292	NM_153178	239528	Mm.23095	NM_153178		Ago2	1110029L17Rik|2310051F07Rik|AI225898|AL022874|AW546247|ENSMUSG00000072493|Eif2c2|Gerp95|Gm10365|mKIAA4215	argonaute RISC catalytic subunit 2	protein-coding
chr15_73148680_73149051	chr15	73148681	73149051	+	0.601533	NA	intron (NM_153178, intron 1 of 18)	intron (NM_153178, intron 1 of 18)	36081	NM_153178	239528	Mm.23095	NM_153178		Ago2	1110029L17Rik|2310051F07Rik|AI225898|AL022874|AW546247|ENSMUSG00000072493|Eif2c2|Gerp95|Gm10365|mKIAA4215	argonaute RISC catalytic subunit 2	protein-coding
chr4_126415740_126416166	chr4	126415741	126416166	+	1.12648	NA	intron (NM_153402, intron 2 of 18)	intron (NM_153402, intron 2 of 18)	13589	NM_153402	214150	Mm.440915	NM_153402		Ago3	AW048688|C130014L07Rik|Eif2c3	argonaute RISC catalytic subunit 3	protein-coding
chr10_78300139_78300488	chr10	78300140	78300488	+	1.25916	NA	intron (NM_053014, intron 2 of 9)	intron (NM_053014, intron 2 of 9)	51386	NM_053014	28169	Mm.141230	NM_053014	ENSMUSG00000001211	Agpat3	AW061257|AW493985|D10Jhu12e|lpaat3	1-acylglycerol-3-phosphate O-acyltransferase 3	protein-coding
chr10_78360141_78360814	chr10	78360142	78360814	+	0.693594	NA	Intergenic	Intergenic	-8778	NM_053014	28169	Mm.141230	NM_053014	ENSMUSG00000001211	Agpat3	AW061257|AW493985|D10Jhu12e|lpaat3	1-acylglycerol-3-phosphate O-acyltransferase 3	protein-coding
chr17_12165090_12165931	chr17	12165091	12165931	+	1.4145	NA	intron (NM_026644, intron 2 of 8)	intron (NM_026644, intron 2 of 8)	46227	NM_026644	68262	Mm.258300	NM_026644	ENSMUSG00000023827	Agpat4	1500003P24Rik	1-acylglycerol-3-phosphate O-acyltransferase 4 (lysophosphatidic acid acyltransferase, delta)	protein-coding
chr17_12165418_12165708	chr17	12165419	12165708	+	1.23881	NA	intron (NM_026644, intron 2 of 8)	intron (NM_026644, intron 2 of 8)	46279	NM_026644	68262	Mm.258300	NM_026644	ENSMUSG00000023827	Agpat4	1500003P24Rik	1-acylglycerol-3-phosphate O-acyltransferase 4 (lysophosphatidic acid acyltransferase, delta)	protein-coding
chr17_12121434_12121788	chr17	12121435	12121788	+	1.22214	NA	intron (NM_026644, intron 1 of 8)	intron (NM_026644, intron 1 of 8)	2327	NM_026644	68262	Mm.258300	NM_026644	ENSMUSG00000023827	Agpat4	1500003P24Rik	1-acylglycerol-3-phosphate O-acyltransferase 4 (lysophosphatidic acid acyltransferase, delta)	protein-coding
chr17_12164681_12164950	chr17	12164682	12164950	+	0.843593	NA	intron (NM_026644, intron 2 of 8)	intron (NM_026644, intron 2 of 8)	45532	NM_026644	68262	Mm.258300	NM_026644	ENSMUSG00000023827	Agpat4	1500003P24Rik	1-acylglycerol-3-phosphate O-acyltransferase 4 (lysophosphatidic acid acyltransferase, delta)	protein-coding
chr17_12205419_12205960	chr17	12205420	12205960	+	0.805603	NA	intron (NM_026644, intron 3 of 8)	L2a|LINE|L2	86406	NM_026644	68262	Mm.258300	NM_026644	ENSMUSG00000023827	Agpat4	1500003P24Rik	1-acylglycerol-3-phosphate O-acyltransferase 4 (lysophosphatidic acid acyltransferase, delta)	protein-coding
chr17_12205128_12206449	chr17	12205129	12206449	+	0.777427	NA	intron (NM_026644, intron 3 of 8)	intron (NM_026644, intron 3 of 8)	86505	NM_026644	68262	Mm.258300	NM_026644	ENSMUSG00000023827	Agpat4	1500003P24Rik	1-acylglycerol-3-phosphate O-acyltransferase 4 (lysophosphatidic acid acyltransferase, delta)	protein-coding
chr17_12171194_12171582	chr17	12171195	12171582	+	0.722789	NA	intron (NM_026644, intron 2 of 8)	intron (NM_026644, intron 2 of 8)	52104	NM_026644	68262	Mm.258300	NM_026644	ENSMUSG00000023827	Agpat4	1500003P24Rik	1-acylglycerol-3-phosphate O-acyltransferase 4 (lysophosphatidic acid acyltransferase, delta)	protein-coding
chr17_12195146_12195547	chr17	12195147	12195547	+	0.658271	NA	intron (NM_026644, intron 2 of 8)	intron (NM_026644, intron 2 of 8)	76063	NM_026644	68262	Mm.258300	NM_026644	ENSMUSG00000023827	Agpat4	1500003P24Rik	1-acylglycerol-3-phosphate O-acyltransferase 4 (lysophosphatidic acid acyltransferase, delta)	protein-coding
chr17_12162880_12163187	chr17	12162881	12163187	+	0.645373	NA	intron (NM_026644, intron 2 of 8)	intron (NM_026644, intron 2 of 8)	43750	NM_026644	68262	Mm.258300	NM_026644	ENSMUSG00000023827	Agpat4	1500003P24Rik	1-acylglycerol-3-phosphate O-acyltransferase 4 (lysophosphatidic acid acyltransferase, delta)	protein-coding
chr5_101240925_101241548	chr5	101240926	101241548	+	1.39521	NA	Intergenic	Intergenic	395008	NM_172715	231510	Mm.271911	NM_172715	ENSMUSG00000029314	Agpat9	1-AGPAT|1-AGPAT 9|4933407I02Rik|4933408F15|9|A230097K15Rik|GPAT-3|mGPAT3	1-acylglycerol-3-phosphate O-acyltransferase 9	protein-coding
chr5_100861806_100862234	chr5	100861807	100862234	+	0.816283	NA	intron (NM_172715, intron 3 of 12)	intron (NM_172715, intron 3 of 12)	15791	NM_172715	231510	Mm.271911	NM_172715	ENSMUSG00000029314	Agpat9	1-AGPAT|1-AGPAT 9|4933407I02Rik|4933408F15|9|A230097K15Rik|GPAT-3|mGPAT3	1-acylglycerol-3-phosphate O-acyltransferase 9	protein-coding
chr5_101233327_101233853	chr5	101233328	101233853	+	0.750959	NA	Intergenic	Intergenic	387361	NM_172715	231510	Mm.271911	NM_172715	ENSMUSG00000029314	Agpat9	1-AGPAT|1-AGPAT 9|4933407I02Rik|4933408F15|9|A230097K15Rik|GPAT-3|mGPAT3	1-acylglycerol-3-phosphate O-acyltransferase 9	protein-coding
chr2_75880391_75880905	chr2	75880392	75880905	+	0.907733	NA	intron (NM_172666, intron 11 of 19)	B2_Mm2|SINE|B2	48471	NM_172666	228061	Mm.31227	NM_172666	ENSMUSG00000042410	Agps	5832437L22|9930035G10Rik|AW123847|Adaps|Adas|Adhaps|Adps|Aldhpsy|bs2	alkylglycerone phosphate synthase	protein-coding
chr12_35896695_35897697	chr12	35896696	35897697	+	1.1238	NA	Intergenic	Intergenic	-28425	NM_207531	403205	Mm.190508	NM_207531	ENSMUSG00000036231	Agr3	BCMP11|E030025L21Rik|Gm888	anterior gradient 3	protein-coding
chr12_35934924_35935222	chr12	35934925	35935222	+	0.869262	NA	intron (NM_207531, intron 3 of 7)	intron (NM_207531, intron 3 of 7)	9452	NM_207531	403205	Mm.190508	NM_207531	ENSMUSG00000036231	Agr3	BCMP11|E030025L21Rik|Gm888	anterior gradient 3	protein-coding
chr1_179828780_179829424	chr1	179828781	179829424	+	0.758986	NA	Intergenic	Intergenic	-25087	NM_026375	226747	Mm.128165	NM_026375	ENSMUSG00000026491	Ahctf1	6230412P20Rik|AV011447|Elys	AT hook containing transcription factor 1	protein-coding
chr2_155046873_155047161	chr2	155046874	155047161	+	1.24911	NA	intron (NM_015770, intron 2 of 3)	B3|SINE|B2	27480	NM_016661	269378	Mm.330692	NM_016661	ENSMUSG00000027597	Ahcy	AA987153|AL024110|CuBP|SAHH	S-adenosylhomocysteine hydrolase	protein-coding
chr3_107683680_107684440	chr3	107683681	107684440	+	1.05857	NA	intron (NM_145542, intron 1 of 16)	intron (NM_145542, intron 1 of 16)	12488	NM_145542	229709	Mm.220328	NM_145542	ENSMUSG00000027893	Ahcyl1	1110034F20Rik|AA409031|AA414901|Ahcy-rs3|DCAL|Irbit	S-adenosylhomocysteine hydrolase-like 1	protein-coding
chr6_29843075_29843420	chr6	29843076	29843420	+	1.41741	NA	intron (NM_001171000, intron 1 of 16)	ORR1D1|LTR|ERVL-MaLR	-16348	NM_001171001	74340	Mm.210899	NM_021414	ENSMUSG00000029772	Ahcyl2	4631427C17Rik|AI227036|Adohcyase3|mKIAA0828	S-adenosylhomocysteine hydrolase-like 2	protein-coding
chr6_29826884_29827828	chr6	29826885	29827828	+	1.01484	NA	intron (NM_001171000, intron 1 of 16)	intron (NM_001171000, intron 1 of 16)	-32240	NM_001171001	74340	Mm.210899	NM_021414	ENSMUSG00000029772	Ahcyl2	4631427C17Rik|AI227036|Adohcyase3|mKIAA0828	S-adenosylhomocysteine hydrolase-like 2	protein-coding
chr6_29837620_29837923	chr6	29837621	29837923	+	0.89347	NA	intron (NM_001171000, intron 1 of 16)	intron (NM_001171000, intron 1 of 16)	-21824	NM_001171001	74340	Mm.210899	NM_021414	ENSMUSG00000029772	Ahcyl2	4631427C17Rik|AI227036|Adohcyase3|mKIAA0828	S-adenosylhomocysteine hydrolase-like 2	protein-coding
chr6_29824705_29824961	chr6	29824706	29824961	+	0.718078	NA	intron (NM_001171000, intron 1 of 16)	intron (NM_001171000, intron 1 of 16)	-34763	NM_001171001	74340	Mm.210899	NM_021414	ENSMUSG00000029772	Ahcyl2	4631427C17Rik|AI227036|Adohcyase3|mKIAA0828	S-adenosylhomocysteine hydrolase-like 2	protein-coding
chr10_21028871_21029494	chr10	21028872	21029494	+	1.24482	NA	intron (NM_026203, intron 18 of 23)	intron (NM_026203, intron 18 of 23)	-11637	NM_001177776	52906	Mm.253280	NM_026203	ENSMUSG00000019986	Ahi1	1700015F03Rik|Ahi-1|D10Bwg0629e	Abelson helper integration site 1	protein-coding
chr10_21099171_21100029	chr10	21099172	21100029	+	1.2169	NA	Intergenic	Intergenic	58780	NM_001177776	52906	Mm.253280	NM_026203	ENSMUSG00000019986	Ahi1	1700015F03Rik|Ahi-1|D10Bwg0629e	Abelson helper integration site 1	protein-coding
chr10_21029179_21029487	chr10	21029180	21029487	+	1.14481	NA	intron (NM_026203, intron 18 of 23)	intron (NM_026203, intron 18 of 23)	-11487	NM_001177776	52906	Mm.253280	NM_026203	ENSMUSG00000019986	Ahi1	1700015F03Rik|Ahi-1|D10Bwg0629e	Abelson helper integration site 1	protein-coding
chr10_20991780_20992209	chr10	20991781	20992209	+	1.03142	NA	intron (NM_026203, intron 15 of 23)	intron (NM_026203, intron 15 of 23)	39448	NM_026203	52906	Mm.253280	NM_026203	ENSMUSG00000019986	Ahi1	1700015F03Rik|Ahi-1|D10Bwg0629e	Abelson helper integration site 1	protein-coding
chr10_20984429_20984863	chr10	20984430	20984863	+	0.773222	NA	intron (NM_026203, intron 13 of 23)	MER20|DNA|hAT-Charlie	32099	NM_026203	52906	Mm.253280	NM_026203	ENSMUSG00000019986	Ahi1	1700015F03Rik|Ahi-1|D10Bwg0629e	Abelson helper integration site 1	protein-coding
chr10_20864943_20865525	chr10	20864944	20865525	+	0.613205	NA	Intergenic	MT2A|LTR|ERVL	-87313	NM_026203	52906	Mm.253280	NM_026203	ENSMUSG00000019986	Ahi1	1700015F03Rik|Ahi-1|D10Bwg0629e	Abelson helper integration site 1	protein-coding
chr19_8982732_8983042	chr19	8982733	8983042	+	0.864205	NA	Intergenic	Intergenic	-6397	NR_104460	66395	Mm.203866	NM_009643	ENSMUSG00000069833	Ahnak	DY6	AHNAK nucleoprotein (desmoyokin)	protein-coding
chr19_8983303_8983601	chr19	8983304	8983601	+	0.7272	NA	Intergenic	Intergenic	-5832	NR_104460	66395	Mm.203866	NM_009643	ENSMUSG00000069833	Ahnak	DY6	AHNAK nucleoprotein (desmoyokin)	protein-coding
chr12_35562798_35563364	chr12	35562799	35563364	+	1.51205	NA	Intergenic	Intergenic	-28092	NM_013464	11622	Mm.341377	NM_013464	ENSMUSG00000019256	Ahr	Ah|Ahh|Ahre|In|bHLHe76	aryl-hydrocarbon receptor	protein-coding
chr12_35553102_35553582	chr12	35553103	35553582	+	0.769829	NA	Intergenic	Intergenic	-18353	NM_013464	11622	Mm.341377	NM_013464	ENSMUSG00000019256	Ahr	Ah|Ahh|Ahre|In|bHLHe76	aryl-hydrocarbon receptor	protein-coding
chr9_55378924_55379242	chr9	55378925	55379242	+	1.1455	NA	intron (NM_172923, intron 2 of 10)	intron (NM_172923, intron 2 of 10)	52134	NM_172923	244886	Mm.24361	NM_172923	ENSMUSG00000032313	AI118078	9630029F15	expressed sequence AI118078	protein-coding
chr9_55378560_55379628	chr9	55378561	55379628	+	1.01449	NA	intron (NM_172923, intron 2 of 10)	intron (NM_172923, intron 2 of 10)	52145	NM_172923	244886	Mm.24361	NM_172923	ENSMUSG00000032313	AI118078	9630029F15	expressed sequence AI118078	protein-coding
chr9_55378586_55378877	chr9	55378587	55378877	+	0.673901	NA	intron (NM_172923, intron 2 of 10)	intron (NM_172923, intron 2 of 10)	51783	NM_172923	244886	Mm.24361	NM_172923	ENSMUSG00000032313	AI118078	9630029F15	expressed sequence AI118078	protein-coding
chr13_107485499_107486156	chr13	107485500	107486156	+	1.17249	NA	Intergenic	Intergenic	16006	NR_045084	105120	Mm.417700	NR_045083		AI197445	-	expressed sequence AI197445	ncRNA
chr13_107574774_107575401	chr13	107574775	107575401	+	1.08681	NA	Intergenic	Intergenic	105266	NR_045084	105120	Mm.417700	NR_045083		AI197445	-	expressed sequence AI197445	ncRNA
chr13_107573535_107574017	chr13	107573536	107574017	+	1.03183	NA	Intergenic	Intergenic	103954	NR_045084	105120	Mm.417700	NR_045083		AI197445	-	expressed sequence AI197445	ncRNA
chr13_107574482_107575392	chr13	107574483	107575392	+	0.934796	NA	Intergenic	Intergenic	105115	NR_045084	105120	Mm.417700	NR_045083		AI197445	-	expressed sequence AI197445	ncRNA
chr13_107400276_107400773	chr13	107400277	107400773	+	0.848457	NA	Intergenic	MusHAL1|LINE|L1	-69297	NR_045083	105120	Mm.417700	NR_045083		AI197445	-	expressed sequence AI197445	ncRNA
chr4_58901940_58902311	chr4	58901941	58902311	+	0.766665	NA	intron (NM_172381, intron 1 of 48)	intron (NM_172381, intron 1 of 48)	10599	NM_172381	230249	Mm.234801	NM_172381	ENSMUSG00000050812	AI314180	AW558785|BB181316|mKIAA0368	expressed sequence AI314180	protein-coding
chr4_53322820_53323650	chr4	53322821	53323650	+	0.637496	NA	Intergenic	Intergenic	-53003	NR_033139	381524	Mm.23351	NM_001033454		AI427809	Gm1659	expressed sequence AI427809	ncRNA
chr4_41502993_41503430	chr4	41502994	41503430	+	0.656653	NA	promoter-TSS (NM_001085515)	promoter-TSS (NM_001085515)	-137	NM_001085515	329828	Mm.27054	NM_001085515	ENSMUSG00000046312	AI464131	AA408153|AI604836|Gm762|Kiaa1161|NET37	expressed sequence AI464131	protein-coding
chr4_41497491_41498171	chr4	41497492	41498171	+	0.619714	NA	exon (NM_001085515, exon 2 of 2)	exon (NM_001085515, exon 2 of 2)	5244	NM_001085515	329828	Mm.27054	NM_001085515	ENSMUSG00000046312	AI464131	AA408153|AI604836|Gm762|Kiaa1161|NET37	expressed sequence AI464131	protein-coding
chr3_107054884_107055267	chr3	107054885	107055267	+	1.0138	NA	TTS (NR_033498)	TTS (NR_033498)	15572	NR_033498	229694	Mm.347584	NM_173787	ENSMUSG00000056145	AI504432	A230102G19	expressed sequence AI504432	ncRNA
chr5_23713573_23713980	chr5	23713574	23713980	+	0.930927	NA	Intergenic	Intergenic	-1110	NR_015554	433855	Mm.205125	NR_015554		AI506816	-	expressed sequence AI506816	ncRNA
chr11_83239596_83240138	chr11	83239597	83240138	+	1.22391	NA	Intergenic	RMER17C-int|LTR|ERVK	16291	NR_015519	100043636	Mm.295569	NR_015519	ENSMUSG00000087107	AI662270	AW496474	expressed sequence AI662270	ncRNA
chr19_5431787_5432413	chr19	5431788	5432413	+	0.789696	NA	Intergenic	Intergenic	6956	NM_001256515	107242	Mm.329658	NM_134149	ENSMUSG00000047423	AI837181	Bles03|N28173	expressed sequence AI837181	protein-coding
chr19_5432128_5432415	chr19	5432129	5432415	+	0.785226	NA	Intergenic	Intergenic	7128	NM_001256515	107242	Mm.329658	NM_134149	ENSMUSG00000047423	AI837181	Bles03|N28173	expressed sequence AI837181	protein-coding
chr5_31576451_31577133	chr5	31576452	31577133	+	0.632687	NA	Intergenic	Intergenic	-5395	NR_102275	100740	Mm.23370	NR_102275		AI839979	-	expressed sequence AI839979	ncRNA
chr7_79563657_79564192	chr7	79563658	79564192	+	0.728729	NA	Intergenic	Intergenic	48490	NR_040312	101694	Mm.41661	NR_040311		AI854517	-	expressed sequence AI854517	ncRNA
chr6_122575718_122576547	chr6	122575719	122576547	+	1.07108	NA	Intergenic	Intergenic	22324	NM_009645	11628	Mm.391503	NM_009645	ENSMUSG00000040627	Aicda	Aid|Arp2	activation-induced cytidine deaminase	protein-coding
chr10_13832480_13833435	chr10	13832481	13833435	+	1.71308	NA	intron (NM_025446, intron 1 of 5)	intron (NM_025446, intron 1 of 5)	35872	NM_025446	66253	Mm.45755	NM_025446	ENSMUSG00000019806	Aig1	1500031O19Rik|AV064870|AW413422|CGI-103	androgen-induced 1	protein-coding
chr10_13775863_13776619	chr10	13775864	13776619	+	1.49487	NA	intron (NM_025446, intron 3 of 5)	intron (NM_025446, intron 3 of 5)	92589	NM_025446	66253	Mm.45755	NM_025446	ENSMUSG00000019806	Aig1	1500031O19Rik|AV064870|AW413422|CGI-103	androgen-induced 1	protein-coding
chr10_13730837_13731485	chr10	13730838	13731485	+	1.43118	NA	intron (NM_025446, intron 3 of 5)	intron (NM_025446, intron 3 of 5)	137669	NM_025446	66253	Mm.45755	NM_025446	ENSMUSG00000019806	Aig1	1500031O19Rik|AV064870|AW413422|CGI-103	androgen-induced 1	protein-coding
chr10_13875062_13875360	chr10	13875063	13875360	+	0.948443	NA	Intergenic	Intergenic	-6381	NM_025446	66253	Mm.45755	NM_025446	ENSMUSG00000019806	Aig1	1500031O19Rik|AV064870|AW413422|CGI-103	androgen-induced 1	protein-coding
chr10_13874398_13875495	chr10	13874399	13875495	+	0.807438	NA	Intergenic	Intergenic	-6117	NM_025446	66253	Mm.45755	NM_025446	ENSMUSG00000019806	Aig1	1500031O19Rik|AV064870|AW413422|CGI-103	androgen-induced 1	protein-coding
chr10_13874725_13875475	chr10	13874726	13875475	+	0.806355	NA	Intergenic	Intergenic	-6270	NM_025446	66253	Mm.45755	NM_025446	ENSMUSG00000019806	Aig1	1500031O19Rik|AV064870|AW413422|CGI-103	androgen-induced 1	protein-coding
chr10_13869688_13870158	chr10	13869689	13870158	+	0.736041	NA	Intergenic	Intergenic	-1093	NM_025446	66253	Mm.45755	NM_025446	ENSMUSG00000019806	Aig1	1500031O19Rik|AV064870|AW413422|CGI-103	androgen-induced 1	protein-coding
chr10_43998496_43998895	chr10	43998497	43998895	+	1.11078	NA	exon (NM_172393, exon 2 of 20)	exon (NM_172393, exon 2 of 20)	6150	NM_172393	11630	Mm.292082	NM_172393	ENSMUSG00000019866	Aim1	AI462491|AI463325	absent in melanoma 1	protein-coding
chr4_134059830_134060194	chr4	134059831	134060194	+	1.00895	NA	Intergenic	Intergenic	-8440	NM_001162970	230806	Mm.240080	NM_001162970	ENSMUSG00000012123	Aim1l	-	absent in melanoma 1-like	protein-coding
chr17_12750616_12751481	chr17	12750617	12751481	+	1.08648	NA	intron (NM_010515, intron 1 of 47)	intron (NM_010515, intron 1 of 47)	9738	NR_027784	104103	Mm.26553	NR_002853	ENSMUSG00000078247	Airn	2810051F02Rik|2810434M15Rik|AI256653|AI597500|AW049873|Air|B930018I07Rik|D17Ertd663e|IGF2RAS	antisense Igf2r RNA	ncRNA
chr17_12750854_12751488	chr17	12750855	12751488	+	1.08361	NA	intron (NM_010515, intron 1 of 47)	intron (NM_010515, intron 1 of 47)	9860	NR_027784	104103	Mm.26553	NR_002853	ENSMUSG00000078247	Airn	2810051F02Rik|2810434M15Rik|AI256653|AI597500|AW049873|Air|B930018I07Rik|D17Ertd663e|IGF2RAS	antisense Igf2r RNA	ncRNA
chr17_12754280_12754859	chr17	12754281	12754859	+	0.847271	NA	intron (NM_010515, intron 1 of 47)	intron (NM_010515, intron 1 of 47)	13259	NR_027784	104103	Mm.26553	NR_002853	ENSMUSG00000078247	Airn	2810051F02Rik|2810434M15Rik|AI256653|AI597500|AW049873|Air|B930018I07Rik|D17Ertd663e|IGF2RAS	antisense Igf2r RNA	ncRNA
chr17_12714995_12715478	chr17	12714996	12715478	+	0.709213	NA	intron (NM_010515, intron 17 of 47)	intron (NM_010515, intron 17 of 47)	-26074	NR_002853	104103	Mm.26553	NR_002853	ENSMUSG00000078247	Airn	2810051F02Rik|2810434M15Rik|AI256653|AI597500|AW049873|Air|B930018I07Rik|D17Ertd663e|IGF2RAS	antisense Igf2r RNA	ncRNA
chr4_129017081_129017720	chr4	129017082	129017720	+	0.803991	NA	Intergenic	Intergenic	24177	NM_001033966	11637	Mm.29460	NM_016895	ENSMUSG00000028792	Ak2	Ak-2|D4Ertd220e	adenylate kinase 2	protein-coding
chr14_78473655_78474594	chr14	78473656	78474594	+	1.39647	NA	Intergenic	L1MA6|LINE|L1	62735	NM_001164503	219181	Mm.89413	NM_001164503	ENSMUSG00000022016	Akap11	6330501D17Rik|AKAP220|Gm80|PRKA11|mKIAA0629	A kinase (PRKA) anchor protein 11	protein-coding
chr14_78458138_78458477	chr14	78458139	78458477	+	0.77176	NA	Intergenic	Intergenic	78552	NM_001164503	219181	Mm.89413	NM_001164503	ENSMUSG00000022016	Akap11	6330501D17Rik|AKAP220|Gm80|PRKA11|mKIAA0629	A kinase (PRKA) anchor protein 11	protein-coding
chr14_78454003_78454459	chr14	78454004	78454459	+	0.691414	NA	Intergenic	Charlie1a|DNA|hAT-Charlie	82629	NM_001164503	219181	Mm.89413	NM_001164503	ENSMUSG00000022016	Akap11	6330501D17Rik|AKAP220|Gm80|PRKA11|mKIAA0629	A kinase (PRKA) anchor protein 11	protein-coding
chr7_75397513_75398063	chr7	75397514	75398063	+	1.22765	NA	Intergenic	MER5A1|DNA|hAT-Charlie	-57746	NM_029332	75547	Mm.216107	NM_029332	ENSMUSG00000066406	Akap13	1700026G02Rik|5730522G15Rik|5830460E08Rik|AKAP-Lbc|BRX|Ht31|LBC|PROTO-LB|PROTO-LBC	A kinase (PRKA) anchor protein 13	protein-coding
chr7_75387788_75388490	chr7	75387789	75388490	+	1.21117	NA	Intergenic	Intergenic	-67395	NM_029332	75547	Mm.216107	NM_029332	ENSMUSG00000066406	Akap13	1700026G02Rik|5730522G15Rik|5830460E08Rik|AKAP-Lbc|BRX|Ht31|LBC|PROTO-LB|PROTO-LBC	A kinase (PRKA) anchor protein 13	protein-coding
chr7_75633863_75634457	chr7	75633864	75634457	+	0.864272	NA	intron (NM_029332, intron 8 of 36)	intron (NM_029332, intron 8 of 36)	178626	NM_029332	75547	Mm.216107	NM_029332	ENSMUSG00000066406	Akap13	1700026G02Rik|5730522G15Rik|5830460E08Rik|AKAP-Lbc|BRX|Ht31|LBC|PROTO-LB|PROTO-LBC	A kinase (PRKA) anchor protein 13	protein-coding
chr7_75642253_75642740	chr7	75642254	75642740	+	0.776023	NA	intron (NM_029332, intron 8 of 36)	intron (NM_029332, intron 8 of 36)	186963	NM_029332	75547	Mm.216107	NM_029332	ENSMUSG00000066406	Akap13	1700026G02Rik|5730522G15Rik|5830460E08Rik|AKAP-Lbc|BRX|Ht31|LBC|PROTO-LB|PROTO-LBC	A kinase (PRKA) anchor protein 13	protein-coding
chr7_75598563_75599009	chr7	75598564	75599009	+	0.768203	NA	intron (NM_029332, intron 5 of 36)	Lx2|LINE|L1	143252	NM_029332	75547	Mm.216107	NM_029332	ENSMUSG00000066406	Akap13	1700026G02Rik|5730522G15Rik|5830460E08Rik|AKAP-Lbc|BRX|Ht31|LBC|PROTO-LB|PROTO-LBC	A kinase (PRKA) anchor protein 13	protein-coding
chr7_75649226_75649657	chr7	75649227	75649657	+	0.672159	NA	intron (NM_029332, intron 8 of 36)	intron (NM_029332, intron 8 of 36)	193908	NM_029332	75547	Mm.216107	NM_029332	ENSMUSG00000066406	Akap13	1700026G02Rik|5730522G15Rik|5830460E08Rik|AKAP-Lbc|BRX|Ht31|LBC|PROTO-LB|PROTO-LBC	A kinase (PRKA) anchor protein 13	protein-coding
chr4_57725442_57726333	chr4	57725443	57726333	+	1.06226	NA	Intergenic	Intergenic	-119360	NM_009649	11641	Mm.467752	NM_009649	ENSMUSG00000038729	Akap2	AA959716|AI649048|Akap-2|Akap-kl|B230340M18Rik|Prka2	A kinase (PRKA) anchor protein 2	protein-coding
chr4_57800403_57800709	chr4	57800404	57800709	+	0.745221	NA	Intergenic	Intergenic	-44692	NM_009649	11641	Mm.467752	NM_009649	ENSMUSG00000038729	Akap2	AA959716|AI649048|Akap-2|Akap-kl|B230340M18Rik|Prka2	A kinase (PRKA) anchor protein 2	protein-coding
chr4_57786272_57786484	chr4	57786273	57786484	+	0.62357	NA	Intergenic	RMER1B|Other|Other	-58870	NM_009649	11641	Mm.467752	NM_009649	ENSMUSG00000038729	Akap2	AA959716|AI649048|Akap-2|Akap-kl|B230340M18Rik|Prka2	A kinase (PRKA) anchor protein 2	protein-coding
chr12_52853540_52853885	chr12	52853541	52853885	+	0.671869	NA	intron (NM_198111, intron 2 of 13)	intron (NM_198111, intron 2 of 13)	154330	NM_198111	238161	Mm.310822	NM_198111	ENSMUSG00000061603	Akap6	AI482140|Akapalpha|Akapbeta|PRKA	A kinase (PRKA) anchor protein 6	protein-coding
chr10_25200676_25201121	chr10	25200677	25201121	+	1.16002	NA	intron (NM_018747, intron 7 of 7)	intron (NM_018747, intron 7 of 7)	98264	NM_018747	432442	Mm.485937	NM_018747	ENSMUSG00000039166	Akap7	6430401D08|AI662165|AKAP15|Akap18|BB170514	A kinase (PRKA) anchor protein 7	protein-coding
chr10_25220629_25221438	chr10	25220630	25221438	+	0.776644	NA	intron (NM_018747, intron 6 of 7)	intron (NM_018747, intron 6 of 7)	78129	NM_018747	432442	Mm.485937	NM_018747	ENSMUSG00000039166	Akap7	6430401D08|AI662165|AKAP15|Akap18|BB170514	A kinase (PRKA) anchor protein 7	protein-coding
chr10_25128396_25128932	chr10	25128397	25128932	+	0.616783	NA	Intergenic	RMER15|LTR|ERVL	170499	NM_018747	432442	Mm.485937	NM_018747	ENSMUSG00000039166	Akap7	6430401D08|AI662165|AKAP15|Akap18|BB170514	A kinase (PRKA) anchor protein 7	protein-coding
chr5_3952445_3953254	chr5	3952446	3953254	+	1.4669	NA	intron (NM_194462, intron 3 of 47)	L1M2|LINE|L1	24664	NM_194462	100986	Mm.46044	NM_194462	ENSMUSG00000040407	Akap9	5730481H23Rik|AKAP-9|AKAP450|AW545847|C79026|G1-448-15|PRKA9|mKIAA0803|mei2-5|repro12	A kinase (PRKA) anchor protein (yotiao) 9	protein-coding
chr5_3992905_3993630	chr5	3992906	3993630	+	1.34398	NA	intron (NM_194462, intron 15 of 47)	MIRb|SINE|MIR	65082	NM_194462	100986	Mm.46044	NM_194462	ENSMUSG00000040407	Akap9	5730481H23Rik|AKAP-9|AKAP450|AW545847|C79026|G1-448-15|PRKA9|mKIAA0803|mei2-5|repro12	A kinase (PRKA) anchor protein (yotiao) 9	protein-coding
chr5_3968357_3968773	chr5	3968358	3968773	+	0.973145	NA	intron (NM_194462, intron 7 of 47)	intron (NM_194462, intron 7 of 47)	40379	NM_194462	100986	Mm.46044	NM_194462	ENSMUSG00000040407	Akap9	5730481H23Rik|AKAP-9|AKAP450|AW545847|C79026|G1-448-15|PRKA9|mKIAA0803|mei2-5|repro12	A kinase (PRKA) anchor protein (yotiao) 9	protein-coding
chr5_3992554_3992846	chr5	3992555	3992846	+	0.723641	NA	intron (NM_194462, intron 15 of 47)	intron (NM_194462, intron 15 of 47)	64514	NM_194462	100986	Mm.46044	NM_194462	ENSMUSG00000040407	Akap9	5730481H23Rik|AKAP-9|AKAP450|AW545847|C79026|G1-448-15|PRKA9|mKIAA0803|mei2-5|repro12	A kinase (PRKA) anchor protein (yotiao) 9	protein-coding
chr4_123752402_123752627	chr4	123752403	123752627	+	0.713132	NA	Intergenic	Intergenic	-2216	NM_023423	68050	Mm.27903	NM_023423		Akirin1	6330407G11Rik	akirin 1	protein-coding
chr4_34581301_34581958	chr4	34581302	34581958	+	0.857013	NA	intron (NM_015824, intron 13 of 19)	ORR1D2|LTR|ERVL-MaLR	31015	NM_001007589	433693	Mm.389532	NM_026019	ENSMUSG00000028291	Akirin2	2700059D21Rik|AA114675|AA522011|AU019887|Akirin-2	akirin 2	protein-coding
chr4_34580930_34581953	chr4	34580931	34581953	+	0.84742	NA	intron (NM_015824, intron 13 of 19)	PB1D7|SINE|Alu	30827	NM_001007589	433693	Mm.389532	NM_026019	ENSMUSG00000028291	Akirin2	2700059D21Rik|AA114675|AA522011|AU019887|Akirin-2	akirin 2	protein-coding
chr4_63385284_63385632	chr4	63385285	63385632	+	1.13459	NA	intron (NM_001045514, intron 6 of 21)	intron (NM_001045514, intron 6 of 21)	17987	NM_001045514	100182	Mm.387725	NM_001045514	ENSMUSG00000039158	Akna	AI597013|mKIAA1968	AT-hook transcription factor	protein-coding
chr4_63383448_63383775	chr4	63383449	63383775	+	0.818194	NA	intron (NM_001045514, intron 7 of 21)	MIRb|SINE|MIR	19833	NM_001045514	100182	Mm.387725	NM_001045514	ENSMUSG00000039158	Akna	AI597013|mKIAA1968	AT-hook transcription factor	protein-coding
chr4_63409243_63409759	chr4	63409244	63409759	+	0.61374	NA	Intergenic	Intergenic	-6056	NM_001045514	100182	Mm.387725	NM_001045514	ENSMUSG00000039158	Akna	AI597013|mKIAA1968	AT-hook transcription factor	protein-coding
chr3_108781448_108781880	chr3	108781449	108781880	+	1.62488	NA	intron (NM_177859, intron 11 of 11)	intron (NM_177859, intron 11 of 11)	42006	NM_177859	329738	Mm.72322	NM_177859	ENSMUSG00000049565	Aknad1	4921525H12Rik	AKNA domain containing 1	protein-coding
chr3_108781393_108782007	chr3	108781394	108782007	+	1.41882	NA	intron (NM_177859, intron 11 of 11)	intron (NM_177859, intron 11 of 11)	42042	NM_177859	329738	Mm.72322	NM_177859	ENSMUSG00000049565	Aknad1	4921525H12Rik	AKNA domain containing 1	protein-coding
chr3_108767319_108767787	chr3	108767320	108767787	+	1.30582	NA	intron (NM_177859, intron 6 of 11)	intron (NM_177859, intron 6 of 11)	27895	NM_177859	329738	Mm.72322	NM_177859	ENSMUSG00000049565	Aknad1	4921525H12Rik	AKNA domain containing 1	protein-coding
chr3_108767113_108767793	chr3	108767114	108767793	+	1.27464	NA	intron (NM_177859, intron 6 of 11)	intron (NM_177859, intron 6 of 11)	27795	NM_177859	329738	Mm.72322	NM_177859	ENSMUSG00000049565	Aknad1	4921525H12Rik	AKNA domain containing 1	protein-coding
chr3_108737349_108738090	chr3	108737350	108738090	+	1.00169	NA	Intergenic	ID_B1|SINE|B4	-1938	NM_177859	329738	Mm.72322	NM_177859	ENSMUSG00000049565	Aknad1	4921525H12Rik	AKNA domain containing 1	protein-coding
chr4_116668021_116668609	chr4	116668022	116668609	+	0.947336	NA	Intergenic	Intergenic	-16641	NM_021473	58810	Mm.30085	NM_021473	ENSMUSG00000028692	Akr1a1	2610201A18Rik|Akr1a4	aldo-keto reductase family 1, member A1 (aldehyde reductase)	protein-coding
chr6_34395930_34396553	chr6	34395931	34396553	+	1.57267	NA	intron (NM_172398, intron 9 of 9)	MIRb|SINE|MIR	11995	NM_172398	67861	Mm.70371	NM_172398	ENSMUSG00000061758	Akr1b10	2310005E10Rik|Akr1b16	aldo-keto reductase family 1, member B10 (aldose reductase)	protein-coding
chr6_37563884_37564450	chr6	37563885	37564450	+	1.96654	NA	intron (NM_145364, intron 7 of 8)	intron (NM_145364, intron 7 of 8)	33994	NM_145364	208665	Mm.262635	NM_145364	ENSMUSG00000038641	Akr1d1	-	aldo-keto reductase family 1, member D1	protein-coding
chr6_37523260_37523607	chr6	37523261	37523607	+	1.24471	NA	Intergenic	RLTR25B|LTR|ERVK	-6739	NM_145364	208665	Mm.262635	NM_145364	ENSMUSG00000038641	Akr1d1	-	aldo-keto reductase family 1, member D1	protein-coding
chr13_4712699_4713150	chr13	4712700	4713150	+	0.807488	NA	Intergenic	Intergenic	-103761	NM_018859	56043	Mm.251908	NM_018859	ENSMUSG00000045410	Akr1e1	1810061I10Rik|Akr1e2	aldo-keto reductase family 1, member E1	protein-coding
chr13_4707357_4707709	chr13	4707358	4707709	+	0.729832	NA	Intergenic	Intergenic	-98369	NM_018859	56043	Mm.251908	NM_018859	ENSMUSG00000045410	Akr1e1	1810061I10Rik|Akr1e2	aldo-keto reductase family 1, member E1	protein-coding
chr1_177260398_177260802	chr1	177260399	177260802	+	1.13261	NA	Intergenic	Intergenic	-11833	NM_011785	23797	Mm.235194	NM_011785	ENSMUSG00000019699	Akt3	AI851531|D930002M15Rik|Nmf350	thymoma viral proto-oncogene 3	protein-coding
chr5_90433540_90434229	chr5	90433541	90434229	+	0.940414	NA	Intergenic	MIR|SINE|MIR	-27004	NM_009654	11657	Mm.16773	NM_009654	ENSMUSG00000029368	Alb	Alb-1|Alb1	albumin	protein-coding
chr16_52292337_52293116	chr16	52292338	52293116	+	2.07366	NA	intron (NM_009655, intron 6 of 15)	intron (NM_009655, intron 6 of 15)	160270	NM_009655	11658	Mm.288282	NM_009655	ENSMUSG00000022636	Alcam	AI853494|BEN|CD166|DM-GRASP|MuSC|SC1	activated leukocyte cell adhesion molecule	protein-coding
chr16_52442808_52443475	chr16	52442809	52443475	+	1.09861	NA	intron (NM_009655, intron 1 of 15)	(TCTCTG)n|Simple_repeat|Simple_repeat	9855	NM_009655	11658	Mm.288282	NM_009655	ENSMUSG00000022636	Alcam	AI853494|BEN|CD166|DM-GRASP|MuSC|SC1	activated leukocyte cell adhesion molecule	protein-coding
chr16_52332034_52332526	chr16	52332035	52332526	+	0.953223	NA	intron (NM_009655, intron 1 of 15)	Lx7|LINE|L1	120717	NM_009655	11658	Mm.288282	NM_009655	ENSMUSG00000022636	Alcam	AI853494|BEN|CD166|DM-GRASP|MuSC|SC1	activated leukocyte cell adhesion molecule	protein-coding
chr16_52470092_52470833	chr16	52470093	52470833	+	0.943341	NA	Intergenic	Intergenic	-17466	NM_009655	11658	Mm.288282	NM_009655	ENSMUSG00000022636	Alcam	AI853494|BEN|CD166|DM-GRASP|MuSC|SC1	activated leukocyte cell adhesion molecule	protein-coding
chr16_52443654_52444390	chr16	52443655	52444390	+	0.940917	NA	intron (NM_009655, intron 1 of 15)	intron (NM_009655, intron 1 of 15)	8975	NM_009655	11658	Mm.288282	NM_009655	ENSMUSG00000022636	Alcam	AI853494|BEN|CD166|DM-GRASP|MuSC|SC1	activated leukocyte cell adhesion molecule	protein-coding
chr16_52472815_52473180	chr16	52472816	52473180	+	0.846639	NA	Intergenic	L1M5|LINE|L1	-20001	NM_009655	11658	Mm.288282	NM_009655	ENSMUSG00000022636	Alcam	AI853494|BEN|CD166|DM-GRASP|MuSC|SC1	activated leukocyte cell adhesion molecule	protein-coding
chr16_52470268_52470562	chr16	52470269	52470562	+	0.829014	NA	Intergenic	Intergenic	-17418	NM_009655	11658	Mm.288282	NM_009655	ENSMUSG00000022636	Alcam	AI853494|BEN|CD166|DM-GRASP|MuSC|SC1	activated leukocyte cell adhesion molecule	protein-coding
chr4_45804634_45805021	chr4	45804635	45805021	+	0.735511	NA	TTS (NM_028270)	TTS (NM_028270)	5806	NM_028270	72535	Mm.331583	NM_028270	ENSMUSG00000035561	Aldh1b1	2700007F14Rik	aldehyde dehydrogenase 1 family, member B1	protein-coding
chr19_3975832_3976247	chr19	3975833	3976247	+	0.824763	NA	intron (NM_001177438, intron 1 of 9)	RMER17C2|LTR|ERVK	3712	NM_001177438	621603	Mm.34137	NM_001177438	ENSMUSG00000075296	Aldh3b2	AI848594|C130048D07Rik	aldehyde dehydrogenase 3 family, member B2	protein-coding
chr19_3975547_3976267	chr19	3975548	3976267	+	0.76811	NA	intron (NM_001177438, intron 1 of 9)	RMER17C2|LTR|ERVK	3579	NM_001177438	621603	Mm.34137	NM_001177438	ENSMUSG00000075296	Aldh3b2	AI848594|C130048D07Rik	aldehyde dehydrogenase 3 family, member B2	protein-coding
chr10_21365613_21366312	chr10	21365614	21366312	+	0.729202	NA	intron (NM_019702, intron 16 of 17)	intron (NM_019702, intron 16 of 17)	-11337	NM_178713	237320	Mm.90181	NM_178713	ENSMUSG00000037542	Aldh8a1	Raldh4	aldehyde dehydrogenase 8 family, member A1	protein-coding
chr3_121327383_121327715	chr3	121327384	121327715	+	1.16733	NA	intron (NM_024178, intron 3 of 3)	intron (NM_024178, intron 3 of 3)	35732	NM_024178	66789	Mm.269881	NM_024178	ENSMUSG00000039887	Alg14	5430428G01Rik|AI854024	asparagine-linked glycosylation 14	protein-coding
chr9_50774006_50774488	chr9	50774007	50774488	+	0.820493	NA	promoter-TSS (NM_133981)	promoter-TSS (NM_133981)	-978	NM_133981	102580	Mm.160035	NM_133981	ENSMUSG00000032059	Alg9	8230402H15Rik|AI747665|B430313H07Rik|Dibd1	asparagine-linked glycosylation 9 (alpha 1,2 mannosyltransferase)	protein-coding
chr17_72604518_72604945	chr17	72604519	72604945	+	0.651825	NA	promoter-TSS (NM_007439)	promoter-TSS (NM_007439)	-425	NM_007439	11682	Mm.311854	NM_007439	ENSMUSG00000055471	Alk	CD246|Tcrz	anaplastic lymphoma kinase	protein-coding
chr2_94051922_94052493	chr2	94051923	94052493	+	1.97266	NA	intron (NM_019657, intron 7 of 10)	intron (NM_019657, intron 7 of 10)	-41478	NM_026944	69113	Mm.272498	NM_026944	ENSMUSG00000040174	Alkbh3	1700108H04Rik|1810020C19Rik|Abh3|mABH3	alkB, alkylation repair homolog 3 (E. coli)	protein-coding
chr2_94051892_94052742	chr2	94051893	94052742	+	1.79383	NA	intron (NM_019657, intron 6 of 10)	intron (NM_019657, intron 6 of 10)	-41587	NM_026944	69113	Mm.272498	NM_026944	ENSMUSG00000040174	Alkbh3	1700108H04Rik|1810020C19Rik|Abh3|mABH3	alkB, alkylation repair homolog 3 (E. coli)	protein-coding
chr5_136143310_136143820	chr5	136143311	136143820	+	0.687219	NA	Intergenic	Intergenic	4784	NM_028070	72041	Mm.486605	NM_028070	ENSMUSG00000039754	Alkbh4	2010004B12Rik|Abj4	alkB, alkylation repair homolog 4 (E. coli)	protein-coding
chr9_3344317_3344698	chr9	3344318	3344698	+	0.790294	NA	intron (NM_026303, intron 3 of 11)	intron (NM_026303, intron 3 of 11)	9277	NM_026303	67667	Mm.116968	NM_026303	ENSMUSG00000025899	Alkbh8	4930562C03Rik|8030431D03Rik|9430088N01Rik|Abh8	alkB, alkylation repair homolog 8 (E. coli)	protein-coding
chr11_69172240_69173167	chr11	69172241	69173167	+	1.03502	NA	Intergenic	Intergenic	15632	NM_009659	11686	Mm.340329	NM_009659	ENSMUSG00000032807	Alox12b	Aloxe2|e-LOX2	arachidonate 12-lipoxygenase, 12R type	protein-coding
chr18_65388916_65389517	chr18	65388917	65389517	+	1.36752	NA	intron (NM_001037294, intron 1 of 12)	intron (NM_001037294, intron 1 of 12)	4671	NM_001037294	225638	Mm.296528	NM_001037294	ENSMUSG00000032845	Alpk2	Gm549|Hak	alpha-kinase 2	protein-coding
chr18_65321573_65322739	chr18	65321574	65322739	+	0.908713	NA	intron (NM_001037294, intron 4 of 12)	intron (NM_001037294, intron 4 of 12)	71732	NM_001037294	225638	Mm.296528	NM_001037294	ENSMUSG00000032845	Alpk2	Gm549|Hak	alpha-kinase 2	protein-coding
chr18_65321967_65322739	chr18	65321968	65322739	+	0.859034	NA	intron (NM_001037294, intron 4 of 12)	intron (NM_001037294, intron 4 of 12)	71535	NM_001037294	225638	Mm.296528	NM_001037294	ENSMUSG00000032845	Alpk2	Gm549|Hak	alpha-kinase 2	protein-coding
chr18_65321573_65321804	chr18	65321574	65321804	+	0.844602	NA	intron (NM_001037294, intron 4 of 12)	MLT1C|LTR|ERVL-MaLR	72199	NM_001037294	225638	Mm.296528	NM_001037294	ENSMUSG00000032845	Alpk2	Gm549|Hak	alpha-kinase 2	protein-coding
chr18_65325870_65326179	chr18	65325871	65326179	+	0.794612	NA	intron (NM_001037294, intron 4 of 12)	intron (NM_001037294, intron 4 of 12)	67863	NM_001037294	225638	Mm.296528	NM_001037294	ENSMUSG00000032845	Alpk2	Gm549|Hak	alpha-kinase 2	protein-coding
chr18_65328639_65329043	chr18	65328640	65329043	+	0.718378	NA	intron (NM_001037294, intron 4 of 12)	intron (NM_001037294, intron 4 of 12)	65047	NM_001037294	225638	Mm.296528	NM_001037294	ENSMUSG00000032845	Alpk2	Gm549|Hak	alpha-kinase 2	protein-coding
chr18_65327086_65327502	chr18	65327087	65327502	+	0.66377	NA	intron (NM_001037294, intron 4 of 12)	intron (NM_001037294, intron 4 of 12)	66594	NM_001037294	225638	Mm.296528	NM_001037294	ENSMUSG00000032845	Alpk2	Gm549|Hak	alpha-kinase 2	protein-coding
chr18_65395311_65395985	chr18	65395312	65395985	+	0.66186	NA	intron (NR_105742, intron 3 of 6)	intron (NR_105742, intron 3 of 6)	-1760	NM_001037294	225638	Mm.296528	NM_001037294	ENSMUSG00000032845	Alpk2	Gm549|Hak	alpha-kinase 2	protein-coding
chr9_110880979_110881252	chr9	110880980	110881252	+	0.951809	NA	intron (NM_001146060, intron 1 of 26)	intron (NM_001146060, intron 1 of 26)	794	NM_001146060	235633	Mm.86338	NM_146228	ENSMUSG00000044037	Als2cl	79H19D|79H19E|BC022645|D930044G19Rik|mRn.49018	ALS2 C-terminal like	protein-coding
chr9_110880980_110881350	chr9	110880981	110881350	+	0.922266	NA	intron (NM_001146060, intron 1 of 26)	intron (NM_001146060, intron 1 of 26)	843	NM_001146060	235633	Mm.86338	NM_146228	ENSMUSG00000044037	Als2cl	79H19D|79H19E|BC022645|D930044G19Rik|mRn.49018	ALS2 C-terminal like	protein-coding
chr1_171504729_171504966	chr1	171504730	171504966	+	0.95157	NA	TTS (NM_019484)	TTS (NM_019484)	1370	NM_019484	56009	Mm.389208	NM_019484	ENSMUSG00000060244	Alyref2	C130042O11Rik|REF2|Refbp2	Aly/REF export factor 2	protein-coding
chr10_40309815_40310843	chr10	40309816	40310843	+	0.811002	NA	Intergenic	ORR1B1|LTR|ERVL-MaLR	-8141	NM_009665	11702	Mm.253533	NM_009665	ENSMUSG00000075232	Amd1	1|AdoMetDC|Amd-1|SAMDC|SAMDC 1|adoMetDC1	S-adenosylmethionine decarboxylase 1	protein-coding
chr8_93981532_93982264	chr8	93981533	93982264	+	1.48882	NA	intron (NM_011787, intron 9 of 13)	RLTR15|LTR|ERVK	30742	NM_011787	23802	Mm.34641	NM_011787	ENSMUSG00000031751	Amfr	gp78	autocrine motility factor receptor	protein-coding
chr8_94010067_94010499	chr8	94010068	94010499	+	1.14215	NA	intron (NM_011787, intron 1 of 13)	intron (NM_011787, intron 1 of 13)	2357	NM_011787	23802	Mm.34641	NM_011787	ENSMUSG00000031751	Amfr	gp78	autocrine motility factor receptor	protein-coding
chr8_94010050_94010726	chr8	94010051	94010726	+	1.09621	NA	intron (NM_011787, intron 1 of 13)	intron (NM_011787, intron 1 of 13)	2252	NM_011787	23802	Mm.34641	NM_011787	ENSMUSG00000031751	Amfr	gp78	autocrine motility factor receptor	protein-coding
chr9_45082828_45083556	chr9	45082829	45083556	+	1.02738	NA	intron (NM_001005421, intron 2 of 10)	intron (NM_001005421, intron 2 of 10)	4009	NM_001005421	270152	Mm.190461	NM_001005421	ENSMUSG00000048534	Amica1	AMICA|Crea7|Gm638	adhesion molecule, interacts with CXADR antigen 1	protein-coding
chr15_97258817_97260233	chr15	97258818	97260233	+	0.64272	NA	intron (NM_172293, intron 1 of 5)	intron (NM_172293, intron 1 of 5)	-12238	NM_001164602	105827	Mm.24005	NM_178114	ENSMUSG00000048218	Amigo2	AI415330|AMIGO-2|AW208913|Ali1	adhesion molecule with Ig like domain 2	protein-coding
chr15_97259286_97260002	chr15	97259287	97260002	+	0.641692	NA	intron (NM_172293, intron 1 of 5)	intron (NM_172293, intron 1 of 5)	-12357	NM_001164602	105827	Mm.24005	NM_178114	ENSMUSG00000048218	Amigo2	AI415330|AMIGO-2|AW208913|Ali1	adhesion molecule with Ig like domain 2	protein-coding
chrX_142883371_142884211	chrX	142883372	142884211	+	1.6121	NA	intron (NM_019496, intron 2 of 5)	intron (NM_019496, intron 2 of 5)	82937	NM_019496	56068	Mm.143724	NM_019496		Ammecr1	6230420G18Rik	Alport syndrome, mental retardation, midface hypoplasia and elliptocytosis chromosomal region gene 1	protein-coding
chrX_142898184_142898907	chrX	142898185	142898907	+	1.14589	NA	intron (NM_019496, intron 2 of 5)	intron (NM_019496, intron 2 of 5)	68182	NM_019496	56068	Mm.143724	NM_019496		Ammecr1	6230420G18Rik	Alport syndrome, mental retardation, midface hypoplasia and elliptocytosis chromosomal region gene 1	protein-coding
chrX_142907468_142908077	chrX	142907469	142908077	+	1.10156	NA	intron (NM_019496, intron 2 of 5)	intron (NM_019496, intron 2 of 5)	58955	NM_019496	56068	Mm.143724	NM_019496		Ammecr1	6230420G18Rik	Alport syndrome, mental retardation, midface hypoplasia and elliptocytosis chromosomal region gene 1	protein-coding
chrX_142991780_142992099	chrX	142991781	142992099	+	1.08482	NA	Intergenic	Intergenic	-25212	NM_019496	56068	Mm.143724	NM_019496		Ammecr1	6230420G18Rik	Alport syndrome, mental retardation, midface hypoplasia and elliptocytosis chromosomal region gene 1	protein-coding
chrX_142914170_142914547	chrX	142914171	142914547	+	1.01073	NA	intron (NM_019496, intron 1 of 5)	RMER1B|Other|Other	52369	NM_019496	56068	Mm.143724	NM_019496		Ammecr1	6230420G18Rik	Alport syndrome, mental retardation, midface hypoplasia and elliptocytosis chromosomal region gene 1	protein-coding
chrX_142914162_142914935	chrX	142914163	142914935	+	0.999536	NA	intron (NM_019496, intron 1 of 5)	RMER1B|Other|Other	52179	NM_019496	56068	Mm.143724	NM_019496		Ammecr1	6230420G18Rik	Alport syndrome, mental retardation, midface hypoplasia and elliptocytosis chromosomal region gene 1	protein-coding
chrX_142991778_142992245	chrX	142991779	142992245	+	0.951687	NA	Intergenic	Intergenic	-25284	NM_019496	56068	Mm.143724	NM_019496		Ammecr1	6230420G18Rik	Alport syndrome, mental retardation, midface hypoplasia and elliptocytosis chromosomal region gene 1	protein-coding
chr18_31706023_31706547	chr18	31706024	31706547	+	1.17061	NA	intron (NM_172965, intron 16 of 20)	RLTR42-int|LTR|ERVK	-53539	NM_153515	225339	Mm.290804	NM_153515	ENSMUSG00000041915	Ammecr1l	5430429D03Rik|AU022236|AU040755|AW111353|E230022H04Rik	AMME chromosomal region gene 1-like	protein-coding
chr18_31706246_31706547	chr18	31706247	31706547	+	1.11298	NA	intron (NM_172965, intron 16 of 20)	intron (NM_172965, intron 16 of 20)	-53427	NM_153515	225339	Mm.290804	NM_153515	ENSMUSG00000041915	Ammecr1l	5430429D03Rik|AU022236|AU040755|AW111353|E230022H04Rik	AMME chromosomal region gene 1-like	protein-coding
chr6_149189263_149189490	chr6	149189264	149189490	+	0.961068	NA	promoter-TSS (NM_001113424)	promoter-TSS (NM_001113424)	-665	NM_001113424	232566	Mm.209147	NM_001113424	ENSMUSG00000068250	Amn1	5830467E07Rik|A230083D09|C730024G19Rik	antagonist of mitotic exit network 1	protein-coding
chr6_149193437_149194006	chr6	149193438	149194006	+	0.710969	NA	Intergenic	RLTR30B_MM|LTR|ERV1	-5010	NM_001113424	232566	Mm.209147	NM_001113424	ENSMUSG00000068250	Amn1	5830467E07Rik|A230083D09|C730024G19Rik	antagonist of mitotic exit network 1	protein-coding
chr7_110797505_110798026	chr7	110797506	110798026	+	1.20533	NA	intron (NM_001276301, intron 6 of 14)	intron (NM_001276301, intron 6 of 14)	25162	NM_009667	11717	Mm.3238	NM_009667	ENSMUSG00000005686	Ampd3	-	adenosine monophosphate deaminase 3	protein-coding
chr11_109413126_109413519	chr11	109413127	109413519	+	1.10073	NA	Intergenic	MTE-int|LTR|ERVL-MaLR	-12623	NM_025275	13929	Mm.211850	NM_025275	ENSMUSG00000020610	Amz2	AA408420|ESTM12|X83328	archaelysin family metallopeptidase 2	protein-coding
chr11_109417433_109417907	chr11	109417434	109417907	+	0.951699	NA	Intergenic	Intergenic	-8276	NM_025275	13929	Mm.211850	NM_025275	ENSMUSG00000020610	Amz2	AA408420|ESTM12|X83328	archaelysin family metallopeptidase 2	protein-coding
chr11_109417415_109418134	chr11	109417416	109418134	+	0.84544	NA	Intergenic	Intergenic	-8171	NM_025275	13929	Mm.211850	NM_025275	ENSMUSG00000020610	Amz2	AA408420|ESTM12|X83328	archaelysin family metallopeptidase 2	protein-coding
chr11_109413659_109414026	chr11	109413660	109414026	+	0.638735	NA	Intergenic	Intergenic	-12103	NM_025275	13929	Mm.211850	NM_025275	ENSMUSG00000020610	Amz2	AA408420|ESTM12|X83328	archaelysin family metallopeptidase 2	protein-coding
chr5_52855713_52856092	chr5	52855714	52856092	+	1.35209	NA	intron (NM_024213, intron 17 of 27)	intron (NM_024213, intron 17 of 27)	21768	NM_024213	52206	Mm.272568	NM_024213		Anapc4	2610306D21Rik|APC4|D5Ertd249e	anaphase promoting complex subunit 4	protein-coding
chr5_52908206_52908804	chr5	52908207	52908804	+	1.25607	NA	Intergenic	Intergenic	74370	NM_024213	52206	Mm.272568	NM_024213		Anapc4	2610306D21Rik|APC4|D5Ertd249e	anaphase promoting complex subunit 4	protein-coding
chr5_52847377_52847860	chr5	52847378	52847860	+	0.686472	NA	intron (NM_024213, intron 10 of 27)	ORR1F|LTR|ERVL-MaLR	13484	NM_024213	52206	Mm.272568	NM_024213		Anapc4	2610306D21Rik|APC4|D5Ertd249e	anaphase promoting complex subunit 4	protein-coding
chr2_33176484_33176891	chr2	33176485	33176891	+	0.729962	NA	intron (NM_001290570, intron 7 of 16)	MIR3|SINE|MIR	-39273	NM_011923	26360	Mm.208919	NM_011923	ENSMUSG00000004105	Angptl2	AI593246|AW260363|Arp2	angiopoietin-like 2	protein-coding
chr8_23038376_23038753	chr8	23038377	23038753	+	1.25713	NA	intron (NM_001277284, intron 1 of 42)	intron (NM_001277284, intron 1 of 42)	3466	NM_001277284	11733	Mm.334444	NM_031158	ENSMUSG00000031543	Ank1	Ank-1|nb|pale	ankyrin 1, erythroid	protein-coding
chr8_23038003_23038816	chr8	23038004	23038816	+	0.795849	NA	intron (NM_001277284, intron 1 of 42)	intron (NM_001277284, intron 1 of 42)	3311	NM_001277284	11733	Mm.334444	NM_031158	ENSMUSG00000031543	Ank1	Ank-1|nb|pale	ankyrin 1, erythroid	protein-coding
chr3_126920280_126920914	chr3	126920281	126920914	+	1.73745	NA	Intergenic	Intergenic	22789	NM_001034168	109676	Mm.220242	NM_178655	ENSMUSG00000032826	Ank2	AI835472|AW491075|Ank-2	ankyrin 2, brain	protein-coding
chr3_126831366_126831901	chr3	126831367	126831901	+	1.65848	NA	intron (NM_023813, intron 14 of 17)	intron (NM_023813, intron 14 of 17)	111752	NM_001034168	109676	Mm.220242	NM_178655	ENSMUSG00000032826	Ank2	AI835472|AW491075|Ank-2	ankyrin 2, brain	protein-coding
chr3_126827899_126828258	chr3	126827900	126828258	+	1.07248	NA	intron (NM_023813, intron 14 of 17)	intron (NM_023813, intron 14 of 17)	115307	NM_001034168	109676	Mm.220242	NM_178655	ENSMUSG00000032826	Ank2	AI835472|AW491075|Ank-2	ankyrin 2, brain	protein-coding
chr3_126827904_126828393	chr3	126827905	126828393	+	1.02821	NA	intron (NM_023813, intron 14 of 17)	intron (NM_023813, intron 14 of 17)	115237	NM_001034168	109676	Mm.220242	NM_178655	ENSMUSG00000032826	Ank2	AI835472|AW491075|Ank-2	ankyrin 2, brain	protein-coding
chr3_126829857_126830141	chr3	126829858	126830141	+	0.887972	NA	intron (NM_023813, intron 14 of 17)	intron (NM_023813, intron 14 of 17)	113387	NM_001034168	109676	Mm.220242	NM_178655	ENSMUSG00000032826	Ank2	AI835472|AW491075|Ank-2	ankyrin 2, brain	protein-coding
chr13_96487175_96487845	chr13	96487176	96487845	+	1.565	NA	intron (NM_012048, intron 11 of 14)	intron (NM_012048, intron 11 of 14)	-16350	NM_001042714	271144	Mm.470057	NM_001042714	ENSMUSG00000047117	Ankdd1b	9330128J19Rik	ankyrin repeat and death domain containing 1B	protein-coding
chr18_36548397_36548844	chr18	36548398	36548844	+	1.00604	NA	intron (NM_001271547, intron 19 of 19)	MTD|LTR|ERVL-MaLR	-11982	NM_175375	108857	Mm.482287	NM_175375	ENSMUSG00000024483	Ankhd1	1110004O12Rik|4933432B13Rik|9130019P20Rik|A530027J04Rik|A630021B20Rik|AA571404|Mask|mFLJ00246|mKIAA1085	ankyrin repeat and KH domain containing 1	protein-coding
chr5_3747605_3748137	chr5	3747606	3748137	+	1.31141	NA	intron (NM_001289527, intron 4 of 19)	intron (NM_001289527, intron 4 of 19)	24916	NM_001289529	70797	Mm.130148	NM_001003909	ENSMUSG00000040351	Ankib1	2310061P20Rik|4631416I11Rik|AW494740|C80642|mKIAA1386	ankyrin repeat and IBR domain containing 1	protein-coding
chr5_3799947_3800215	chr5	3799948	3800215	+	0.898691	NA	intron (NM_001289527, intron 1 of 19)	intron (NM_001289527, intron 1 of 19)	3043	NM_001289528	70797	Mm.130148	NM_001003909	ENSMUSG00000040351	Ankib1	2310061P20Rik|4631416I11Rik|AW494740|C80642|mKIAA1386	ankyrin repeat and IBR domain containing 1	protein-coding
chr19_36184343_36184740	chr19	36184344	36184740	+	0.720852	NA	Intergenic	Intergenic	-64698	NM_013468	107765	Mm.10279	NM_013468	ENSMUSG00000024803	Ankrd1	Alrp|CARP|Crap|MARP1	ankyrin repeat domain 1 (cardiac muscle)	protein-coding
chr8_122962081_122962338	chr8	122962082	122962338	+	0.743049	NA	intron (NR_037865, intron 2 of 13)	intron (NR_037865, intron 2 of 13)	80074	NR_037865	77087	Mm.31567	NM_001081379	ENSMUSG00000035569	Ankrd11	2410104C19Rik|3010027A04Rik|6330578C09Rik|9530048I21Rik|AA930108|Gm176|Yod	ankyrin repeat domain 11	protein-coding
chr8_122962005_122962478	chr8	122962006	122962478	+	0.739793	NA	intron (NR_037865, intron 2 of 13)	intron (NR_037865, intron 2 of 13)	80042	NR_037865	77087	Mm.31567	NM_001081379	ENSMUSG00000035569	Ankrd11	2410104C19Rik|3010027A04Rik|6330578C09Rik|9530048I21Rik|AA930108|Gm176|Yod	ankyrin repeat domain 11	protein-coding
chr17_66065109_66065488	chr17	66065110	66065488	+	1.04618	NA	intron (NM_001025572, intron 1 of 12)	intron (NM_001025572, intron 1 of 12)	11747	NM_001025572	106585	Mm.34706	NM_001025572	ENSMUSG00000034647	Ankrd12	2900001A12Rik|AI447928|ANCO-2|AV347965|GAC-1|mKIAA0874	ankyrin repeat domain 12	protein-coding
chr17_66048685_66049332	chr17	66048686	66049332	+	0.884507	NA	intron (NM_001025572, intron 3 of 12)	ORR1C1|LTR|ERVL-MaLR	28037	NM_001025572	106585	Mm.34706	NM_001025572	ENSMUSG00000034647	Ankrd12	2900001A12Rik|AI447928|ANCO-2|AV347965|GAC-1|mKIAA0874	ankyrin repeat domain 12	protein-coding
chr17_66065008_66065910	chr17	66065009	66065910	+	0.810551	NA	intron (NM_001025572, intron 1 of 12)	intron (NM_001025572, intron 1 of 12)	11587	NM_001025572	106585	Mm.34706	NM_001025572	ENSMUSG00000034647	Ankrd12	2900001A12Rik|AI447928|ANCO-2|AV347965|GAC-1|mKIAA0874	ankyrin repeat domain 12	protein-coding
chr3_157971225_157971545	chr3	157971226	157971545	+	0.797112	NA	intron (NM_001013806, intron 3 of 12)	B3A|SINE|B2	23919	NM_001013806	433667	Mm.265806	NM_001013806	ENSMUSG00000039988	Ankrd13c	AI505652|AU022220	ankyrin repeat domain 13c	protein-coding
chr5_90344178_90344557	chr5	90344179	90344557	+	0.976451	NA	intron (NM_198010, intron 1 of 32)	intron (NM_198010, intron 1 of 32)	21817	NM_030886	81702	Mm.245522	NM_030886	ENSMUSG00000055204	Ankrd17	4933425K22Rik|A130069E23Rik|A930008M01|AA407558|AA516750|AU040470|Foe|Gtar|Mask|mKIAA0697	ankyrin repeat domain 17	protein-coding
chr5_90363973_90364210	chr5	90363974	90364210	+	0.738288	NA	intron (NM_198010, intron 1 of 32)	intron (NM_198010, intron 1 of 32)	2093	NM_030886	81702	Mm.245522	NM_030886	ENSMUSG00000055204	Ankrd17	4933425K22Rik|A130069E23Rik|A930008M01|AA407558|AA516750|AU040470|Foe|Gtar|Mask|mKIAA0697	ankyrin repeat domain 17	protein-coding
chr5_90364032_90364198	chr5	90364033	90364198	+	0.700039	NA	intron (NM_198010, intron 1 of 32)	intron (NM_198010, intron 1 of 32)	2070	NM_030886	81702	Mm.245522	NM_030886	ENSMUSG00000055204	Ankrd17	4933425K22Rik|A130069E23Rik|A930008M01|AA407558|AA516750|AU040470|Foe|Gtar|Mask|mKIAA0697	ankyrin repeat domain 17	protein-coding
chr19_42017891_42018209	chr19	42017892	42018209	+	0.686389	NA	intron (NM_145500, intron 1 of 2)	intron (NM_145500, intron 1 of 2)	-17988	NM_020033	56642	Mm.143737	NM_020033	ENSMUSG00000025172	Ankrd2	Arpp|mArpp	ankyrin repeat domain 2 (stretch responsive muscle)	protein-coding
chr19_34171264_34171707	chr19	34171265	34171707	+	0.847715	NA	Intergenic	Intergenic	-5445	NM_024204	52024	Mm.183030	NM_024204	ENSMUSG00000024774	Ankrd22	5430429D21Rik|D19Ertd675e	ankyrin repeat domain 22	protein-coding
chr19_34171248_34171864	chr19	34171249	34171864	+	0.847473	NA	Intergenic	Intergenic	-5515	NM_024204	52024	Mm.183030	NM_024204	ENSMUSG00000024774	Ankrd22	5430429D21Rik|D19Ertd675e	ankyrin repeat domain 22	protein-coding
chr19_34166470_34166757	chr19	34166471	34166757	+	0.644538	NA	promoter-TSS (NM_024204)	promoter-TSS (NM_024204)	-573	NM_024204	52024	Mm.183030	NM_024204	ENSMUSG00000024774	Ankrd22	5430429D21Rik|D19Ertd675e	ankyrin repeat domain 22	protein-coding
chr14_31768602_31768877	chr14	31768603	31768877	+	1.0305	NA	intron (NM_001024604, intron 2 of 27)	intron (NM_001024604, intron 2 of 27)	61675	NM_001024604	105522	Mm.37660	NM_001024604	ENSMUSG00000014496	Ankrd28	AI465466|AI604979|E430019N21Rik|mKIAA0379	ankyrin repeat domain 28	protein-coding
chr14_31785654_31786056	chr14	31785655	31786056	+	0.654637	NA	intron (NM_001024604, intron 1 of 27)	MLT1L|LTR|ERVL-MaLR	44560	NM_001024604	105522	Mm.37660	NM_001024604	ENSMUSG00000014496	Ankrd28	AI465466|AI604979|E430019N21Rik|mKIAA0379	ankyrin repeat domain 28	protein-coding
chr14_31779957_31780322	chr14	31779958	31780322	+	0.599105	NA	intron (NM_001024604, intron 1 of 27)	intron (NM_001024604, intron 1 of 27)	50275	NM_001024604	105522	Mm.37660	NM_001024604	ENSMUSG00000014496	Ankrd28	AI465466|AI604979|E430019N21Rik|mKIAA0379	ankyrin repeat domain 28	protein-coding
chr15_31365677_31366162	chr15	31365678	31366162	+	0.932526	NA	intron (NM_027496, intron 1 of 3)	intron (NM_027496, intron 1 of 3)	1839	NM_001164441	67434	Mm.102470	NM_026153	ENSMUSG00000022237	Ankrd33b	0610012A05Rik|3021401C12Rik|5730557B15Rik	ankyrin repeat domain 33B	protein-coding
chr15_31365483_31366164	chr15	31365484	31366164	+	0.798699	NA	intron (NM_027496, intron 1 of 3)	intron (NM_027496, intron 1 of 3)	1935	NM_001164441	67434	Mm.102470	NM_026153	ENSMUSG00000022237	Ankrd33b	0610012A05Rik|3021401C12Rik|5730557B15Rik	ankyrin repeat domain 33B	protein-coding
chr15_31356687_31357339	chr15	31356688	31357339	+	0.72915	NA	intron (NM_027496, intron 1 of 3)	intron (NM_027496, intron 1 of 3)	10746	NM_001164441	67434	Mm.102470	NM_026153	ENSMUSG00000022237	Ankrd33b	0610012A05Rik|3021401C12Rik|5730557B15Rik	ankyrin repeat domain 33B	protein-coding
chr15_31356903_31357312	chr15	31356904	31357312	+	0.682155	NA	intron (NM_027496, intron 1 of 3)	intron (NM_027496, intron 1 of 3)	10651	NM_001164441	67434	Mm.102470	NM_026153	ENSMUSG00000022237	Ankrd33b	0610012A05Rik|3021401C12Rik|5730557B15Rik	ankyrin repeat domain 33B	protein-coding
chr13_92416696_92417315	chr13	92416697	92417315	+	0.777775	NA	Intergenic	Intergenic	-8963	NM_175455	218440	Mm.213623	NM_175455	ENSMUSG00000045034	Ankrd34b	6430502M16Rik|DP58	ankyrin repeat domain 34B	protein-coding
chr1_54935462_54935991	chr1	54935463	54935991	+	1.31138	NA	Intergenic	URR1B|DNA|hAT-Charlie	-9340	NM_001081433	329154	Mm.397910	NM_001081433	ENSMUSG00000052331	Ankrd44	4930444A19Rik|A130096K20|E130014H08Rik|PP6-ARS-B	ankyrin repeat domain 44	protein-coding
chr1_54934897_54936002	chr1	54934898	54936002	+	1.06065	NA	Intergenic	Lx10|LINE|L1	-9063	NM_001081433	329154	Mm.397910	NM_001081433	ENSMUSG00000052331	Ankrd44	4930444A19Rik|A130096K20|E130014H08Rik|PP6-ARS-B	ankyrin repeat domain 44	protein-coding
chr1_54870876_54871355	chr1	54870877	54871355	+	1.00146	NA	intron (NM_001081433, intron 1 of 27)	intron (NM_001081433, intron 1 of 27)	55271	NM_001081433	329154	Mm.397910	NM_001081433	ENSMUSG00000052331	Ankrd44	4930444A19Rik|A130096K20|E130014H08Rik|PP6-ARS-B	ankyrin repeat domain 44	protein-coding
chr1_54821871_54822471	chr1	54821872	54822471	+	0.916779	NA	intron (NM_001081433, intron 2 of 27)	intron (NM_001081433, intron 2 of 27)	104216	NM_001081433	329154	Mm.397910	NM_001081433	ENSMUSG00000052331	Ankrd44	4930444A19Rik|A130096K20|E130014H08Rik|PP6-ARS-B	ankyrin repeat domain 44	protein-coding
chr1_54839757_54840015	chr1	54839758	54840015	+	0.82838	NA	intron (NM_001081433, intron 1 of 27)	intron (NM_001081433, intron 1 of 27)	86501	NM_001081433	329154	Mm.397910	NM_001081433	ENSMUSG00000052331	Ankrd44	4930444A19Rik|A130096K20|E130014H08Rik|PP6-ARS-B	ankyrin repeat domain 44	protein-coding
chr1_54934907_54935358	chr1	54934908	54935358	+	0.751954	NA	Intergenic	ERVL-E-int|LTR|ERVL	-8746	NM_001081433	329154	Mm.397910	NM_001081433	ENSMUSG00000052331	Ankrd44	4930444A19Rik|A130096K20|E130014H08Rik|PP6-ARS-B	ankyrin repeat domain 44	protein-coding
chr1_54904146_54904506	chr1	54904147	54904506	+	0.67887	NA	intron (NM_001081433, intron 1 of 27)	Lx5c|LINE|L1	22061	NM_001081433	329154	Mm.397910	NM_001081433	ENSMUSG00000052331	Ankrd44	4930444A19Rik|A130096K20|E130014H08Rik|PP6-ARS-B	ankyrin repeat domain 44	protein-coding
chr1_54823524_54823824	chr1	54823525	54823824	+	0.67685	NA	intron (NM_001081433, intron 2 of 27)	intron (NM_001081433, intron 2 of 27)	102713	NM_001081433	329154	Mm.397910	NM_001081433	ENSMUSG00000052331	Ankrd44	4930444A19Rik|A130096K20|E130014H08Rik|PP6-ARS-B	ankyrin repeat domain 44	protein-coding
chr1_54922296_54922660	chr1	54922297	54922660	+	0.654299	NA	intron (NM_001081433, intron 1 of 27)	MIR|SINE|MIR	3909	NM_001081433	329154	Mm.397910	NM_001081433	ENSMUSG00000052331	Ankrd44	4930444A19Rik|A130096K20|E130014H08Rik|PP6-ARS-B	ankyrin repeat domain 44	protein-coding
chr1_161140091_161140686	chr1	161140092	161140686	+	1.01201	NA	Intergenic	B1F|SINE|Alu	-2323	NM_028664	73844	Mm.38830	NM_028664		Ankrd45	4933409K03Rik	ankyrin repeat domain 45	protein-coding
chr15_36491334_36492419	chr15	36491335	36492419	+	1.74935	NA	intron (NM_175134, intron 2 of 4)	intron (NM_175134, intron 2 of 4)	4914	NM_175134	68839	Mm.396537	NM_175134	ENSMUSG00000048307	Ankrd46	1110054N06Rik|AI314978|AI987733	ankyrin repeat domain 46	protein-coding
chr15_36397341_36397572	chr15	36397342	36397572	+	0.879848	NA	Intergenic	MLT1J2|LTR|ERVL-MaLR	99334	NM_175134	68839	Mm.396537	NM_175134	ENSMUSG00000048307	Ankrd46	1110054N06Rik|AI314978|AI987733	ankyrin repeat domain 46	protein-coding
chr15_36423890_36424328	chr15	36423891	36424328	+	0.840485	NA	Intergenic	Intergenic	72682	NM_175134	68839	Mm.396537	NM_175134	ENSMUSG00000048307	Ankrd46	1110054N06Rik|AI314978|AI987733	ankyrin repeat domain 46	protein-coding
chr15_36423921_36424471	chr15	36423922	36424471	+	0.832665	NA	Intergenic	Intergenic	72595	NM_175134	68839	Mm.396537	NM_175134	ENSMUSG00000048307	Ankrd46	1110054N06Rik|AI314978|AI987733	ankyrin repeat domain 46	protein-coding
chr3_38491511_38492148	chr3	38491512	38492148	+	0.941932	NA	Intergenic	MLT1E2|LTR|ERVL-MaLR	-7014	NM_001167883	99696	Mm.290937	NM_001033198	ENSMUSG00000044864	Ankrd50	AI662170|E430012K20Rik|mKIAA1223|mKIAA3019	ankyrin repeat domain 50	protein-coding
chr3_38491311_38492188	chr3	38491312	38492188	+	0.899092	NA	Intergenic	MLT1E2|LTR|ERVL-MaLR	-6934	NM_001167883	99696	Mm.290937	NM_001033198	ENSMUSG00000044864	Ankrd50	AI662170|E430012K20Rik|mKIAA1223|mKIAA3019	ankyrin repeat domain 50	protein-coding
chr13_112318160_112318492	chr13	112318161	112318492	+	1.41746	NA	intron (NM_001168403, intron 2 of 11)	intron (NM_001168403, intron 2 of 11)	29808	NM_001168404	77318	Mm.159895	NM_029898	ENSMUSG00000049985	Ankrd55	C030011J08Rik	ankyrin repeat domain 55	protein-coding
chr13_112317953_112318601	chr13	112317954	112318601	+	1.22464	NA	intron (NM_001168403, intron 2 of 11)	intron (NM_001168403, intron 2 of 11)	29759	NM_001168404	77318	Mm.159895	NM_029898	ENSMUSG00000049985	Ankrd55	C030011J08Rik	ankyrin repeat domain 55	protein-coding
chr13_112258446_112258953	chr13	112258447	112258953	+	1.11468	NA	Intergenic	ORR1F|LTR|ERVL-MaLR	-29751	NM_001168403	77318	Mm.159895	NM_029898	ENSMUSG00000049985	Ankrd55	C030011J08Rik	ankyrin repeat domain 55	protein-coding
chr13_112271944_112272576	chr13	112271945	112272576	+	0.754714	NA	Intergenic	Intergenic	-16191	NM_001168403	77318	Mm.159895	NM_029898	ENSMUSG00000049985	Ankrd55	C030011J08Rik	ankyrin repeat domain 55	protein-coding
chr4_32905396_32905767	chr4	32905397	32905767	+	0.891365	NA	intron (NM_001012450, intron 1 of 16)	intron (NM_001012450, intron 1 of 16)	17923	NM_080471	140577	Mm.214766	NM_080471	ENSMUSG00000040183	Ankrd6	-	ankyrin repeat domain 6	protein-coding
chr12_110939395_110939979	chr12	110939396	110939979	+	0.920207	NA	intron (NM_001081057, intron 12 of 20)	intron (NM_001081057, intron 12 of 20)	39334	NM_175207	74251	Mm.250989	NM_175207	ENSMUSG00000037904	Ankrd9	2500003O20Rik	ankyrin repeat domain 9	protein-coding
chr15_95802621_95803463	chr15	95802622	95803463	+	0.916145	NA	intron (NM_175344, intron 1 of 19)	intron (NM_175344, intron 1 of 19)	12199	NM_001253813	105722	Mm.38087	NM_175344	ENSMUSG00000064210	Ano6	2900059G15Rik|AA407480|AW554778|F730003B03Rik|Tmem16f	anoctamin 6	protein-coding
chr15_95805112_95805493	chr15	95805113	95805493	+	0.808074	NA	intron (NM_175344, intron 1 of 19)	intron (NM_175344, intron 1 of 19)	14460	NM_001253813	105722	Mm.38087	NM_175344	ENSMUSG00000064210	Ano6	2900059G15Rik|AA407480|AW554778|F730003B03Rik|Tmem16f	anoctamin 6	protein-coding
chr1_93391433_93392020	chr1	93391434	93392020	+	1.01829	NA	intron (NM_207031, intron 10 of 23)	intron (NM_207031, intron 10 of 23)	17831	NM_001271884	404545	Mm.297411	NM_207031	ENSMUSG00000034107	Ano7	Ngep|Ngep-L|Pcanap5|Tmem16g	anoctamin 7	protein-coding
chr1_93388981_93389322	chr1	93388982	93389322	+	0.829208	NA	intron (NM_207031, intron 8 of 23)	intron (NM_207031, intron 8 of 23)	15256	NM_001271884	404545	Mm.297411	NM_207031	ENSMUSG00000034107	Ano7	Ngep|Ngep-L|Pcanap5|Tmem16g	anoctamin 7	protein-coding
chr9_62372337_62372825	chr9	62372338	62372825	+	1.36307	NA	intron (NM_009672, intron 3 of 6)	intron (NM_009672, intron 3 of 6)	31238	NM_009672	11737	Mm.269088	NM_009672	ENSMUSG00000032249	Anp32a	Anp32|I1PP2A|LANP|PHAP1|W91701|pp32	acidic (leucine-rich) nuclear phosphoprotein 32 family, member A	protein-coding
chr4_46458068_46458750	chr4	46458069	46458750	+	0.722752	NA	intron (NM_130889, intron 1 of 6)	PB1D9|SINE|Alu	7292	NM_130889	67628	Mm.263913	NM_130889	ENSMUSG00000028333	Anp32b	2410015B15Rik|PAL31|PHAPI2a|Ssp29	acidic (leucine-rich) nuclear phosphoprotein 32 family, member B	protein-coding
chr5_98034982_98035270	chr5	98034983	98035270	+	1.50437	NA	Intergenic	Intergenic	-4164	NM_133738	71914	Mm.24842	NM_133738		Antxr2	2310046B19Rik|AW561899|CMG-2|CMG2|cI-35	anthrax toxin receptor 2	protein-coding
chr5_98081223_98081632	chr5	98081224	98081632	+	1.14325	NA	Intergenic	Intergenic	-50466	NM_133738	71914	Mm.24842	NM_133738		Antxr2	2310046B19Rik|AW561899|CMG-2|CMG2|cI-35	anthrax toxin receptor 2	protein-coding
chr5_97999307_98000097	chr5	97999308	98000097	+	1.115	NA	intron (NM_133738, intron 7 of 16)	intron (NM_133738, intron 7 of 16)	31260	NM_133738	71914	Mm.24842	NM_133738		Antxr2	2310046B19Rik|AW561899|CMG-2|CMG2|cI-35	anthrax toxin receptor 2	protein-coding
chr5_97849120_97849800	chr5	97849121	97849800	+	0.841712	NA	Intergenic	Intergenic	181502	NM_133738	71914	Mm.24842	NM_133738		Antxr2	2310046B19Rik|AW561899|CMG-2|CMG2|cI-35	anthrax toxin receptor 2	protein-coding
chr5_97846516_97846856	chr5	97846517	97846856	+	0.767994	NA	Intergenic	MTE2b|LTR|ERVL-MaLR	184276	NM_133738	71914	Mm.24842	NM_133738		Antxr2	2310046B19Rik|AW561899|CMG-2|CMG2|cI-35	anthrax toxin receptor 2	protein-coding
chr5_97890668_97891024	chr5	97890669	97891024	+	0.662594	NA	intron (NM_133738, intron 16 of 16)	intron (NM_133738, intron 16 of 16)	140116	NM_133738	71914	Mm.24842	NM_133738		Antxr2	2310046B19Rik|AW561899|CMG-2|CMG2|cI-35	anthrax toxin receptor 2	protein-coding
chr19_20393598_20394110	chr19	20393599	20394110	+	0.91249	NA	Intergenic	Intergenic	-3183	NM_010730	16952	Mm.248360	NM_010730	ENSMUSG00000024659	Anxa1	Anx-1|Anx-A1|C430014K04Rik|Lpc-1|Lpc1	annexin A1	protein-coding
chr14_25839638_25840136	chr14	25839639	25840136	+	1.1213	NA	Intergenic	URR1A|DNA|hAT-Charlie	-2268	NM_013469	11744	Mm.294083	NM_013469	ENSMUSG00000021866	Anxa11	A830099O17Rik|Anx11	annexin A11	protein-coding
chr14_25861771_25862138	chr14	25861772	25862138	+	0.955298	NA	intron (NM_013469, intron 1 of 14)	intron (NM_013469, intron 1 of 14)	19800	NM_013469	11744	Mm.294083	NM_013469	ENSMUSG00000021866	Anxa11	A830099O17Rik|Anx11	annexin A11	protein-coding
chr14_25857399_25857730	chr14	25857400	25857730	+	0.769054	NA	intron (NM_013469, intron 1 of 14)	intron (NM_013469, intron 1 of 14)	15410	NM_013469	11744	Mm.294083	NM_013469	ENSMUSG00000021866	Anxa11	A830099O17Rik|Anx11	annexin A11	protein-coding
chr5_96857018_96857679	chr5	96857019	96857679	+	1.03017	NA	Intergenic	Intergenic	63964	NM_013470	11745	Mm.7214	NM_013470	ENSMUSG00000029484	Anxa3	Anx3	annexin A3	protein-coding
chr5_96824665_96825303	chr5	96824666	96825303	+	0.860725	NA	intron (NM_013470, intron 7 of 12)	intron (NM_013470, intron 7 of 12)	31599	NM_013470	11745	Mm.7214	NM_013470	ENSMUSG00000029484	Anxa3	Anx3	annexin A3	protein-coding
chr5_96856132_96856933	chr5	96856133	96856933	+	0.82006	NA	Intergenic	RMER1B|Other|Other	63148	NM_013470	11745	Mm.7214	NM_013470	ENSMUSG00000029484	Anxa3	Anx3	annexin A3	protein-coding
chr6_86784698_86785275	chr6	86784699	86785275	+	0.792205	NA	intron (NM_013471, intron 1 of 12)	B4A|SINE|B4	8597	NM_013471	11746	Mm.259702	NM_013471	ENSMUSG00000029994	Anxa4	AI265406|AIV|AW106930|Anx4|Xanx-4	annexin A4	protein-coding
chr6_86777279_86778244	chr6	86777280	86778244	+	0.788134	NA	intron (NM_013471, intron 1 of 12)	intron (NM_013471, intron 1 of 12)	15822	NM_013471	11746	Mm.259702	NM_013471	ENSMUSG00000029994	Anxa4	AI265406|AIV|AW106930|Anx4|Xanx-4	annexin A4	protein-coding
chr1_58169827_58170507	chr1	58169828	58170507	+	0.719052	NA	intron (NM_023617, intron 23 of 34)	intron (NM_023617, intron 23 of 34)	-40230	NM_023631	71872	Mm.244525	NM_023631	ENSMUSG00000038242	Aox4	2310003G12Rik|Aoh2	aldehyde oxidase 4	protein-coding
chr3_127860619_127861275	chr3	127860620	127861275	+	1.20287	NA	Intergenic	Intergenic	-23455	NM_145964	211556	Mm.403486	NM_145964	ENSMUSG00000074238	Ap1ar	AA407621|C78909|Gadkin	adaptor-related protein complex 1 associated regulatory protein	protein-coding
chr11_5000135_5000582	chr11	5000136	5000582	+	1.07443	NA	intron (NM_007454, intron 1 of 20)	intron (NM_007454, intron 1 of 20)	13535	NM_007454	11764	Mm.274816	NM_007454	ENSMUSG00000009090	Ap1b1	Adtb1|b2b1660Clo	adaptor protein complex AP-1, beta 1 subunit	protein-coding
chr11_4999899_5000603	chr11	4999900	5000603	+	0.973791	NA	intron (NM_007454, intron 1 of 20)	intron (NM_007454, intron 1 of 20)	13427	NM_007454	11764	Mm.274816	NM_007454	ENSMUSG00000009090	Ap1b1	Adtb1|b2b1660Clo	adaptor protein complex AP-1, beta 1 subunit	protein-coding
chr8_109773164_109773634	chr8	109773165	109773634	+	0.894529	NA	Intergenic	Intergenic	-5184	NM_009677	11765	Mm.37210	NM_009677		Ap1g1	AA409002|AU041323|AW551707|Adtg|D8Ertd374e	adaptor protein complex AP-1, gamma 1 subunit	protein-coding
chr1_79701550_79702118	chr1	79701551	79702118	+	1.54738	NA	TTS (NM_001111279)	TTS (NM_001111279)	-29862	NM_183027	252903	Mm.32409	NM_183027	ENSMUSG00000054702	Ap1s3	1190009B22|Jr2|[s]3A	adaptor-related protein complex AP-1, sigma 3	protein-coding
chr1_79559220_79559939	chr1	79559221	79559939	+	1.15958	NA	Intergenic	Intergenic	112392	NM_183027	252903	Mm.32409	NM_183027	ENSMUSG00000054702	Ap1s3	1190009B22|Jr2|[s]3A	adaptor-related protein complex AP-1, sigma 3	protein-coding
chr1_79559233_79559731	chr1	79559234	79559731	+	1.08228	NA	Intergenic	Intergenic	112490	NM_183027	252903	Mm.32409	NM_183027	ENSMUSG00000054702	Ap1s3	1190009B22|Jr2|[s]3A	adaptor-related protein complex AP-1, sigma 3	protein-coding
chr1_79581422_79581745	chr1	79581423	79581745	+	0.921403	NA	Intergenic	Intergenic	90388	NM_183027	252903	Mm.32409	NM_183027	ENSMUSG00000054702	Ap1s3	1190009B22|Jr2|[s]3A	adaptor-related protein complex AP-1, sigma 3	protein-coding
chr1_79581147_79582027	chr1	79581148	79582027	+	0.869849	NA	Intergenic	Intergenic	90385	NM_183027	252903	Mm.32409	NM_183027	ENSMUSG00000054702	Ap1s3	1190009B22|Jr2|[s]3A	adaptor-related protein complex AP-1, sigma 3	protein-coding
chr7_141580088_141580511	chr7	141580089	141580511	+	1.10636	NA	intron (NM_007459, intron 1 of 21)	intron (NM_007459, intron 1 of 21)	18120	NM_007459	11772	Mm.253090	NM_007459	ENSMUSG00000002957	Ap2a2	2410074K14Rik|AF006990|AW146353|Adtab|C78001|L25	adaptor-related protein complex 2, alpha 2 subunit	protein-coding
chr7_141564563_141564969	chr7	141564564	141564969	+	1.01586	NA	intron (NM_007459, intron 1 of 21)	intron (NM_007459, intron 1 of 21)	2586	NM_007459	11772	Mm.253090	NM_007459	ENSMUSG00000002957	Ap2a2	2410074K14Rik|AF006990|AW146353|Adtab|C78001|L25	adaptor-related protein complex 2, alpha 2 subunit	protein-coding
chr10_91028859_91029488	chr10	91028860	91029488	+	1.60269	NA	intron (NM_001282947, intron 17 of 26)	L1MB4|LINE|L1	53569	NM_001042558	11783	Mm.220289	NM_009684	ENSMUSG00000019979	Apaf1	6230400I06Rik|Apaf-1|Apaf1l|fog|mKIAA0413	apoptotic peptidase activating factor 1	protein-coding
chr10_91076636_91077088	chr10	91076637	91077088	+	0.894919	NA	intron (NM_001282947, intron 4 of 26)	ID4|SINE|ID	5881	NM_001042558	11783	Mm.220289	NM_009684	ENSMUSG00000019979	Apaf1	6230400I06Rik|Apaf-1|Apaf1l|fog|mKIAA0413	apoptotic peptidase activating factor 1	protein-coding
chr10_91076680_91077315	chr10	91076681	91077315	+	0.7689	NA	intron (NM_001282947, intron 4 of 26)	MLT1D|LTR|ERVL-MaLR	5745	NM_001042558	11783	Mm.220289	NM_009684	ENSMUSG00000019979	Apaf1	6230400I06Rik|Apaf-1|Apaf1l|fog|mKIAA0413	apoptotic peptidase activating factor 1	protein-coding
chr2_22723990_22724655	chr2	22723991	22724655	+	1.31404	NA	Intergenic	Lx8|LINE|L1	-50004	NM_019456	54519	Mm.14255	NM_019456	ENSMUSG00000026786	Apbb1ip	9930118P07Rik|Prp48	amyloid beta (A4) precursor protein-binding, family B, member 1 interacting protein	protein-coding
chr2_22724233_22724637	chr2	22724234	22724637	+	1.21653	NA	Intergenic	ORR1B2|LTR|ERVL-MaLR	-49892	NM_019456	54519	Mm.14255	NM_019456	ENSMUSG00000026786	Apbb1ip	9930118P07Rik|Prp48	amyloid beta (A4) precursor protein-binding, family B, member 1 interacting protein	protein-coding
chr2_22761216_22761670	chr2	22761217	22761670	+	1.18771	NA	Intergenic	Intergenic	-12884	NM_019456	54519	Mm.14255	NM_019456	ENSMUSG00000026786	Apbb1ip	9930118P07Rik|Prp48	amyloid beta (A4) precursor protein-binding, family B, member 1 interacting protein	protein-coding
chr2_22761067_22761687	chr2	22761068	22761687	+	1.16292	NA	Intergenic	Intergenic	-12950	NM_019456	54519	Mm.14255	NM_019456	ENSMUSG00000026786	Apbb1ip	9930118P07Rik|Prp48	amyloid beta (A4) precursor protein-binding, family B, member 1 interacting protein	protein-coding
chr2_22799333_22799742	chr2	22799334	22799742	+	1.08792	NA	intron (NM_019456, intron 1 of 13)	MTD|LTR|ERVL-MaLR	25211	NM_019456	54519	Mm.14255	NM_019456	ENSMUSG00000026786	Apbb1ip	9930118P07Rik|Prp48	amyloid beta (A4) precursor protein-binding, family B, member 1 interacting protein	protein-coding
chr2_22793684_22794175	chr2	22793685	22794175	+	0.936202	NA	intron (NM_019456, intron 1 of 13)	intron (NM_019456, intron 1 of 13)	19603	NM_019456	54519	Mm.14255	NM_019456	ENSMUSG00000026786	Apbb1ip	9930118P07Rik|Prp48	amyloid beta (A4) precursor protein-binding, family B, member 1 interacting protein	protein-coding
chr2_22783404_22783661	chr2	22783405	22783661	+	0.926516	NA	intron (NM_019456, intron 1 of 13)	intron (NM_019456, intron 1 of 13)	9206	NM_019456	54519	Mm.14255	NM_019456	ENSMUSG00000026786	Apbb1ip	9930118P07Rik|Prp48	amyloid beta (A4) precursor protein-binding, family B, member 1 interacting protein	protein-coding
chr2_22769267_22769552	chr2	22769268	22769552	+	0.720035	NA	Intergenic	ORR1F|LTR|ERVL-MaLR	-4917	NM_019456	54519	Mm.14255	NM_019456	ENSMUSG00000026786	Apbb1ip	9930118P07Rik|Prp48	amyloid beta (A4) precursor protein-binding, family B, member 1 interacting protein	protein-coding
chr2_22781408_22781677	chr2	22781409	22781677	+	0.686999	NA	intron (NM_019456, intron 1 of 13)	L1_Mus4|LINE|L1	7216	NM_019456	54519	Mm.14255	NM_019456	ENSMUSG00000026786	Apbb1ip	9930118P07Rik|Prp48	amyloid beta (A4) precursor protein-binding, family B, member 1 interacting protein	protein-coding
chr2_22792292_22792787	chr2	22792293	22792787	+	0.645273	NA	intron (NM_019456, intron 1 of 13)	intron (NM_019456, intron 1 of 13)	18213	NM_019456	54519	Mm.14255	NM_019456	ENSMUSG00000026786	Apbb1ip	9930118P07Rik|Prp48	amyloid beta (A4) precursor protein-binding, family B, member 1 interacting protein	protein-coding
chr9_108120651_108121100	chr9	108120652	108121100	+	1.17942	NA	intron (NM_007567, intron 3 of 11)	intron (NM_007567, intron 3 of 11)	-26396	NM_146226	235606	Mm.219639	NM_146226	ENSMUSG00000032590	Apeh	-	acylpeptide hydrolase	protein-coding
chr9_108120198_108121100	chr9	108120199	108121100	+	1.04609	NA	intron (NM_007567, intron 3 of 11)	intron (NM_007567, intron 3 of 11)	-26169	NM_146226	235606	Mm.219639	NM_146226	ENSMUSG00000032590	Apeh	-	acylpeptide hydrolase	protein-coding
chr9_66802447_66803371	chr9	66802448	66803371	+	0.621183	NA	Intergenic	Intergenic	-7486	NM_177583	208117	Mm.41291	NM_177583	ENSMUSG00000032375	Aph1b	2310057K14Rik|Aph1c	anterior pharynx defective 1b homolog (C. elegans)	protein-coding
chrX_48046057_48046680	chrX	48046058	48046680	+	1.62207	NA	Intergenic	ORR1E|LTR|ERVL-MaLR	-11517	NM_013912	30878	Mm.29262	NM_013912	ENSMUSG00000037010	Apln	6030430G11Rik|Apel	apelin	protein-coding
chr9_46168511_46169247	chr9	46168512	46169247	+	1.53488	NA	intron (NM_027498, intron 4 of 24)	intron (NM_027498, intron 4 of 24)	-59751	NM_009692	11806	Mm.26743	NM_009692	ENSMUSG00000032083	Apoa1	Alp-1|Apoa-1|Brp-14|Ltw-1|Lvtw-1|Sep-1|Sep-2|Sep2|apo-AI|apoA-I	apolipoprotein A-I	protein-coding
chr9_46172284_46172589	chr9	46172285	46172589	+	1.16821	NA	intron (NM_027498, intron 4 of 24)	intron (NM_027498, intron 4 of 24)	-56193	NM_009692	11806	Mm.26743	NM_009692	ENSMUSG00000032083	Apoa1	Alp-1|Apoa-1|Brp-14|Ltw-1|Lvtw-1|Sep-1|Sep-2|Sep2|apo-AI|apoA-I	apolipoprotein A-I	protein-coding
chr9_46163494_46163966	chr9	46163495	46163966	+	0.921869	NA	intron (NM_027498, intron 4 of 24)	intron (NM_027498, intron 4 of 24)	-64900	NM_009692	11806	Mm.26743	NM_009692	ENSMUSG00000032083	Apoa1	Alp-1|Apoa-1|Brp-14|Ltw-1|Lvtw-1|Sep-1|Sep-2|Sep2|apo-AI|apoA-I	apolipoprotein A-I	protein-coding
chr9_46120942_46121185	chr9	46120943	46121185	+	0.715716	NA	intron (NM_027498, intron 1 of 24)	MER44C|DNA|TcMar-Tigger	-107566	NM_009692	11806	Mm.26743	NM_009692	ENSMUSG00000032083	Apoa1	Alp-1|Apoa-1|Brp-14|Ltw-1|Lvtw-1|Sep-1|Sep-2|Sep2|apo-AI|apoA-I	apolipoprotein A-I	protein-coding
chr9_46173001_46173328	chr9	46173002	46173328	+	0.667214	NA	intron (NM_027498, intron 4 of 24)	intron (NM_027498, intron 4 of 24)	-55465	NM_009692	11806	Mm.26743	NM_009692	ENSMUSG00000032083	Apoa1	Alp-1|Apoa-1|Brp-14|Ltw-1|Lvtw-1|Sep-1|Sep-2|Sep2|apo-AI|apoA-I	apolipoprotein A-I	protein-coding
chr16_31352816_31353355	chr16	31352817	31353355	+	0.680695	NA	Intergenic	Intergenic	-38278	NM_001301354	11815	Mm.2082	NM_007470	ENSMUSG00000022548	Apod	-	apolipoprotein D	protein-coding
chr15_77785745_77786219	chr15	77785746	77786219	+	0.879343	NA	intron (NM_022410, intron 13 of 40)	intron (NM_022410, intron 13 of 40)	-30753	NM_001081970	239552	Mm.125650	NM_001081970	ENSMUSG00000056656	Apol8	9830006J20Rik|APOL-II|Apol2	apolipoprotein L 8	protein-coding
chr15_77785523_77786207	chr15	77785524	77786207	+	0.819368	NA	intron (NM_022410, intron 13 of 40)	intron (NM_022410, intron 13 of 40)	-30636	NM_001081970	239552	Mm.125650	NM_001081970	ENSMUSG00000056656	Apol8	9830006J20Rik|APOL-II|Apol2	apolipoprotein L 8	protein-coding
chr10_128256332_128256729	chr10	128256333	128256729	+	1.23935	NA	TTS (NM_133996)	TTS (NM_133996)	2400	NM_133996	28194	Mm.439846	NM_133996	ENSMUSG00000051716	Apon	AI195275|D10Ucla2	apolipoprotein N	protein-coding
chr10_128258953_128259318	chr10	128258954	128259318	+	0.829362	NA	Intergenic	Lx8|LINE|L1	5005	NM_133996	28194	Mm.439846	NM_133996	ENSMUSG00000051716	Apon	AI195275|D10Ucla2	apolipoprotein N	protein-coding
chrX_112347985_112348379	chrX	112347986	112348379	+	0.913247	NA	intron (NM_026565, intron 3 of 8)	intron (NM_026565, intron 3 of 8)	36774	NM_026565	68117	Mm.161014	NM_026565	ENSMUSG00000025525	Apool	6720473G16Rik|9430083G14Rik|E130106L15Rik	apolipoprotein O-like	protein-coding
chr4_40704477_40704724	chr4	40704478	40704724	+	0.706936	NA	Intergenic	L1MB1|LINE|L1	-1407	NM_001025445	66408	Mm.430710	NM_025545	ENSMUSG00000028411	Aptx	2410016G21Rik|AA388047|FHA-HIT	aprataxin	protein-coding
chrX_20816970_20817876	chrX	20816971	20817876	+	1.22244	NA	Intergenic	Intergenic	-31120	NM_009703	11836	Mm.220946	NM_009703	ENSMUSG00000001127	Araf	1200013E08Rik|A-Raf|AW495444|Araf1	v-raf murine sarcoma 3611 viral oncogene homolog	protein-coding
chrX_20816991_20817556	chrX	20816992	20817556	+	1.18493	NA	Intergenic	Intergenic	-31269	NM_009703	11836	Mm.220946	NM_009703	ENSMUSG00000001127	Araf	1200013E08Rik|A-Raf|AW495444|Araf1	v-raf murine sarcoma 3611 viral oncogene homolog	protein-coding
chrX_20816993_20817269	chrX	20816994	20817269	+	1.06633	NA	Intergenic	Intergenic	-31412	NM_009703	11836	Mm.220946	NM_009703	ENSMUSG00000001127	Araf	1200013E08Rik|A-Raf|AW495444|Araf1	v-raf murine sarcoma 3611 viral oncogene homolog	protein-coding
chr7_101361676_101362108	chr7	101361677	101362108	+	0.828572	NA	intron (NM_001040111, intron 1 of 33)	intron (NM_001040111, intron 1 of 33)	13823	NM_001040111	69710	Mm.277687	NM_027180	ENSMUSG00000032812	Arap1	2410002L19Rik|Centd2|mKIAA0782	ArfGAP with RhoGAP domain, ankyrin repeat and PH domain 1	protein-coding
chr7_101361794_101362108	chr7	101361795	101362108	+	0.823153	NA	intron (NM_001040111, intron 1 of 33)	intron (NM_001040111, intron 1 of 33)	13882	NM_001040111	69710	Mm.277687	NM_027180	ENSMUSG00000032812	Arap1	2410002L19Rik|Centd2|mKIAA0782	ArfGAP with RhoGAP domain, ankyrin repeat and PH domain 1	protein-coding
chr5_62780550_62780872	chr5	62780551	62780872	+	1.27912	NA	Intergenic	Intergenic	-14534	NM_178407	212285	Mm.244403	NM_178407	ENSMUSG00000037999	Arap2	Centd1|Gm148|mKIAA0580	ArfGAP with RhoGAP domain, ankyrin repeat and PH domain 2	protein-coding
chr5_62786806_62787108	chr5	62786807	62787108	+	0.890162	NA	Intergenic	Lx8|LINE|L1	-20780	NM_178407	212285	Mm.244403	NM_178407	ENSMUSG00000037999	Arap2	Centd1|Gm148|mKIAA0580	ArfGAP with RhoGAP domain, ankyrin repeat and PH domain 2	protein-coding
chr5_62788477_62788701	chr5	62788478	62788701	+	0.8746	NA	Intergenic	Intergenic	-22412	NM_178407	212285	Mm.244403	NM_178407	ENSMUSG00000037999	Arap2	Centd1|Gm148|mKIAA0580	ArfGAP with RhoGAP domain, ankyrin repeat and PH domain 2	protein-coding
chr15_74687314_74688053	chr15	74687315	74688053	+	0.872847	NA	Intergenic	Intergenic	-15114	NM_018790	11838	Mm.491310	NM_018790	ENSMUSG00000022602	Arc	Arc3.1|C86064|arg3.1|mArc	activity regulated cytoskeletal-associated protein	protein-coding
chr12_84958219_84958712	chr12	84958220	84958712	+	1.15024	NA	intron (NM_178065, intron 1 of 19)	intron (NM_178065, intron 1 of 19)	12420	NM_178065	68497	Mm.24446	NM_178065	ENSMUSG00000042350	Arel1	1110018G07Rik|AI649076|AW610792|Kiaa0317|mKIAA0317	apoptosis resistant E3 ubiquitin protein ligase 1	protein-coding
chr12_84968897_84969752	chr12	84968898	84969752	+	0.911991	NA	intron (NM_178065, intron 1 of 19)	intron (NM_178065, intron 1 of 19)	1561	NM_178065	68497	Mm.24446	NM_178065	ENSMUSG00000042350	Arel1	1110018G07Rik|AI649076|AW610792|Kiaa0317|mKIAA0317	apoptosis resistant E3 ubiquitin protein ligase 1	protein-coding
chr12_84956324_84956719	chr12	84956325	84956719	+	0.85647	NA	intron (NM_178065, intron 1 of 19)	L3b|LINE|CR1	14364	NM_178065	68497	Mm.24446	NM_178065	ENSMUSG00000042350	Arel1	1110018G07Rik|AI649076|AW610792|Kiaa0317|mKIAA0317	apoptosis resistant E3 ubiquitin protein ligase 1	protein-coding
chr11_59226285_59226999	chr11	59226286	59226999	+	0.909041	NA	intron (NM_007476, intron 1 of 4)	intron (NM_007476, intron 1 of 4)	1520	NM_001130408	11840	Mm.371546	NM_007476	ENSMUSG00000048076	Arf1	-	ADP-ribosylation factor 1	protein-coding
chr11_59219680_59220004	chr11	59219681	59220004	+	0.682986	NA	intron (NM_007476, intron 1 of 4)	intron (NM_007476, intron 1 of 4)	8320	NM_001130408	11840	Mm.371546	NM_007476	ENSMUSG00000048076	Arf1	-	ADP-ribosylation factor 1	protein-coding
chr11_103964002_103964406	chr11	103964003	103964406	+	1.31088	NA	Intergenic	MTD|LTR|ERVL-MaLR	-2667	NM_007477	11841	Mm.5061	NM_007477	ENSMUSG00000062421	Arf2	-	ADP-ribosylation factor 2	protein-coding
chr12_69416804_69417128	chr12	69416805	69417128	+	1.53177	NA	Intergenic	Intergenic	44816	NM_007481	11845	Mm.27308	NM_007481	ENSMUSG00000044147	Arf6	AI788669|AW496366	ADP-ribosylation factor 6	protein-coding
chr12_69416784_69417315	chr12	69416785	69417315	+	1.39885	NA	Intergenic	Intergenic	44900	NM_007481	11845	Mm.27308	NM_007481	ENSMUSG00000044147	Arf6	AI788669|AW496366	ADP-ribosylation factor 6	protein-coding
chr1_10219913_10220551	chr1	10219914	10220551	+	0.732337	NA	intron (NM_001102430, intron 1 of 37)	Lx9|LINE|L1	12438	NM_001102430	211673	Mm.229141	NM_001102430	ENSMUSG00000067851	Arfgef1	ARFGEP1|BIG1|D130059B05Rik|D730028O18Rik|P200	ADP-ribosylation factor guanine nucleotide-exchange factor 1(brefeldin A-inhibited)	protein-coding
chr3_84579959_84580247	chr3	84579960	84580247	+	1.00012	NA	intron (NM_001293801, intron 1 of 7)	URR1B|DNA|hAT-Charlie	2522	NM_001081093	99889	Mm.316536	NM_001081093	ENSMUSG00000074513	Arfip1	2310030I10Rik|Arfaptin|D3Ertd598e	ADP-ribosylation factor interacting protein 1	protein-coding
chr3_84570515_84571209	chr3	84570516	84571209	+	0.683494	NA	intron (NM_001293801, intron 1 of 7)	intron (NM_001293801, intron 1 of 7)	11763	NM_001081093	99889	Mm.316536	NM_001081093	ENSMUSG00000074513	Arfip1	2310030I10Rik|Arfaptin|D3Ertd598e	ADP-ribosylation factor interacting protein 1	protein-coding
chr2_113886077_113886451	chr2	113886078	113886451	+	0.694736	NA	Intergenic	Intergenic	-37603	NM_181416	228482	Mm.45753	NM_181416	ENSMUSG00000041219	Arhgap11a	6530401L14Rik|mKIAA0013	Rho GTPase activating protein 11A	protein-coding
chr2_43856747_43857196	chr2	43856748	43857196	+	1.07754	NA	intron (NM_153820, intron 5 of 13)	intron (NM_153820, intron 5 of 13)	108145	NM_001025377	76117	Mm.217350	NM_153820	ENSMUSG00000049744	Arhgap15	5830480G12Rik	Rho GTPase activating protein 15	protein-coding
chr2_43753312_43753553	chr2	43753313	43753553	+	0.866415	NA	intron (NM_153820, intron 1 of 13)	intron (NM_153820, intron 1 of 13)	4606	NM_001025377	76117	Mm.217350	NM_153820	ENSMUSG00000049744	Arhgap15	5830480G12Rik	Rho GTPase activating protein 15	protein-coding
chr2_43720286_43720791	chr2	43720287	43720791	+	0.759923	NA	Intergenic	ID4_|SINE|ID	-28285	NM_153820	76117	Mm.217350	NM_153820	ENSMUSG00000049744	Arhgap15	5830480G12Rik	Rho GTPase activating protein 15	protein-coding
chr2_43752985_43753622	chr2	43752986	43753622	+	0.642116	NA	intron (NM_153820, intron 1 of 13)	intron (NM_153820, intron 1 of 13)	4477	NM_001025377	76117	Mm.217350	NM_153820	ENSMUSG00000049744	Arhgap15	5830480G12Rik	Rho GTPase activating protein 15	protein-coding
chr2_44345308_44345736	chr2	44345309	44345736	+	1.32552	NA	intron (NM_153820, intron 13 of 13)	intron (NM_153820, intron 13 of 13)	-280198	NR_040622	320872	Mm.445023	NR_040622	ENSMUSG00000085089	Arhgap15os	A430092G05Rik	Rho GTPase activating protein 15, opposite strand	ncRNA
chr2_44166723_44167088	chr2	44166724	44167088	+	1.23255	NA	intron (NM_153820, intron 10 of 13)	intron (NM_153820, intron 10 of 13)	-101582	NR_040622	320872	Mm.445023	NR_040622	ENSMUSG00000085089	Arhgap15os	A430092G05Rik	Rho GTPase activating protein 15, opposite strand	ncRNA
chr2_44344867_44345242	chr2	44344868	44345242	+	1.11013	NA	intron (NM_153820, intron 13 of 13)	intron (NM_153820, intron 13 of 13)	-279731	NR_040622	320872	Mm.445023	NR_040622	ENSMUSG00000085089	Arhgap15os	A430092G05Rik	Rho GTPase activating protein 15, opposite strand	ncRNA
chr2_44165759_44166235	chr2	44165760	44166235	+	0.90882	NA	intron (NM_153820, intron 10 of 13)	intron (NM_153820, intron 10 of 13)	-100673	NR_040622	320872	Mm.445023	NR_040622	ENSMUSG00000085089	Arhgap15os	A430092G05Rik	Rho GTPase activating protein 15, opposite strand	ncRNA
chr2_44165696_44166459	chr2	44165697	44166459	+	0.837368	NA	intron (NM_153820, intron 10 of 13)	intron (NM_153820, intron 10 of 13)	-100754	NR_040622	320872	Mm.445023	NR_040622	ENSMUSG00000085089	Arhgap15os	A430092G05Rik	Rho GTPase activating protein 15, opposite strand	ncRNA
chr7_123361707_123362007	chr7	123361708	123362007	+	1.35118	NA	intron (NM_001122643, intron 1 of 19)	intron (NM_001122643, intron 1 of 19)	8058	NM_001122643	70497	Mm.403318	NM_144529	ENSMUSG00000030766	Arhgap17	5730403H17Rik|Nadrin|Nadrin2|Rich1|Wbp15	Rho GTPase activating protein 17	protein-coding
chr7_123322130_123323065	chr7	123322131	123323065	+	1.2769	NA	intron (NM_001122643, intron 4 of 19)	intron (NM_001122643, intron 4 of 19)	47317	NM_001122643	70497	Mm.403318	NM_144529	ENSMUSG00000030766	Arhgap17	5730403H17Rik|Nadrin|Nadrin2|Rich1|Wbp15	Rho GTPase activating protein 17	protein-coding
chr7_123346612_123347270	chr7	123346613	123347270	+	1.2638	NA	intron (NM_001122643, intron 1 of 19)	intron (NM_001122643, intron 1 of 19)	22974	NM_001122643	70497	Mm.403318	NM_144529	ENSMUSG00000030766	Arhgap17	5730403H17Rik|Nadrin|Nadrin2|Rich1|Wbp15	Rho GTPase activating protein 17	protein-coding
chr7_123361223_123362017	chr7	123361224	123362017	+	1.25629	NA	intron (NM_001122643, intron 1 of 19)	intron (NM_001122643, intron 1 of 19)	8295	NM_001122643	70497	Mm.403318	NM_144529	ENSMUSG00000030766	Arhgap17	5730403H17Rik|Nadrin|Nadrin2|Rich1|Wbp15	Rho GTPase activating protein 17	protein-coding
chr7_123361223_123361662	chr7	123361224	123361662	+	0.76697	NA	intron (NM_001122643, intron 1 of 19)	intron (NM_001122643, intron 1 of 19)	8472	NM_001122643	70497	Mm.403318	NM_144529	ENSMUSG00000030766	Arhgap17	5730403H17Rik|Nadrin|Nadrin2|Rich1|Wbp15	Rho GTPase activating protein 17	protein-coding
chr10_26878931_26879581	chr10	26878932	26879581	+	1.14467	NA	intron (NM_176837, intron 9 of 14)	intron (NM_176837, intron 9 of 14)	106744	NM_176837	73910	Mm.356496	NM_176837	ENSMUSG00000039031	Arhgap18	4833419J07Rik|AI314906|AI843501	Rho GTPase activating protein 18	protein-coding
chr10_26996008_26996467	chr10	26996009	26996467	+	1.07109	NA	intron (NM_008481, intron 57 of 63)	intron (NM_008481, intron 57 of 63)	223726	NM_176837	73910	Mm.356496	NM_176837	ENSMUSG00000039031	Arhgap18	4833419J07Rik|AI314906|AI843501	Rho GTPase activating protein 18	protein-coding
chr10_26995632_26996545	chr10	26995633	26996545	+	1.006	NA	intron (NM_008481, intron 57 of 63)	intron (NM_008481, intron 57 of 63)	223577	NM_176837	73910	Mm.356496	NM_176837	ENSMUSG00000039031	Arhgap18	4833419J07Rik|AI314906|AI843501	Rho GTPase activating protein 18	protein-coding
chr10_26995632_26995944	chr10	26995633	26995944	+	0.630954	NA	intron (NM_008481, intron 57 of 63)	intron (NM_008481, intron 57 of 63)	223276	NM_176837	73910	Mm.356496	NM_176837	ENSMUSG00000039031	Arhgap18	4833419J07Rik|AI314906|AI843501	Rho GTPase activating protein 18	protein-coding
chr5_102481099_102482343	chr5	102481100	102482343	+	1.30872	NA	5' UTR (NM_029270, exon 1 of 10)	5' UTR (NM_029270, exon 1 of 10)	330	NM_029270	231532	Mm.440191	NM_029270	ENSMUSG00000057315	Arhgap24	0610025G21Rik	Rho GTPase activating protein 24	protein-coding
chr5_102451687_102452245	chr5	102451688	102452245	+	0.701163	NA	Intergenic	Intergenic	-29425	NM_146161	231532	Mm.440191	NM_029270	ENSMUSG00000057315	Arhgap24	0610025G21Rik	Rho GTPase activating protein 24	protein-coding
chr6_87536168_87536469	chr6	87536169	87536469	+	0.896702	NA	Intergenic	Intergenic	-3060	NM_001286610	232201	Mm.119564	NM_175476		Arhgap25	A130039I20Rik	Rho GTPase activating protein 25	protein-coding
chr18_39019851_39020247	chr18	39019852	39020247	+	0.82231	NA	intron (NM_175164, intron 1 of 22)	intron (NM_175164, intron 1 of 22)	26904	NM_175164	71302	Mm.329396	NM_175164	ENSMUSG00000036452	Arhgap26	1810044B20Rik|2610010G17Rik|4933432P15Rik|AI853435|mKIAA0621	Rho GTPase activating protein 26	protein-coding
chr18_39137440_39137805	chr18	39137441	39137805	+	0.675196	NA	intron (NM_175164, intron 10 of 22)	intron (NM_175164, intron 10 of 22)	144478	NM_175164	71302	Mm.329396	NM_175164	ENSMUSG00000036452	Arhgap26	1810044B20Rik|2610010G17Rik|4933432P15Rik|AI853435|mKIAA0621	Rho GTPase activating protein 26	protein-coding
chr18_39010301_39011080	chr18	39010302	39011080	+	0.611057	NA	intron (NM_175164, intron 1 of 22)	intron (NM_175164, intron 1 of 22)	17546	NM_175164	71302	Mm.329396	NM_175164	ENSMUSG00000036452	Arhgap26	1810044B20Rik|2610010G17Rik|4933432P15Rik|AI853435|mKIAA0621	Rho GTPase activating protein 26	protein-coding
chr16_38678767_38679223	chr16	38678768	38679223	+	1.12768	NA	intron (NM_020260, intron 1 of 11)	RCHARR1|DNA|hAT-Charlie	34040	NM_020260	12549	Mm.370848	NM_020260	ENSMUSG00000022799	Arhgap31	5830477L08Rik|AU041750|Cdgap|D330026I07Rik	Rho GTPase activating protein 31	protein-coding
chr16_38679317_38680051	chr16	38679318	38680051	+	0.654484	NA	intron (NM_020260, intron 1 of 11)	intron (NM_020260, intron 1 of 11)	33351	NM_020260	12549	Mm.370848	NM_020260	ENSMUSG00000022799	Arhgap31	5830477L08Rik|AU041750|Cdgap|D330026I07Rik	Rho GTPase activating protein 31	protein-coding
chr16_38679311_38680480	chr16	38679312	38680480	+	0.618462	NA	intron (NM_020260, intron 1 of 11)	intron (NM_020260, intron 1 of 11)	33139	NM_020260	12549	Mm.370848	NM_020260	ENSMUSG00000022799	Arhgap31	5830477L08Rik|AU041750|Cdgap|D330026I07Rik	Rho GTPase activating protein 31	protein-coding
chr9_32089876_32090288	chr9	32089877	32090288	+	1.14725	NA	Intergenic	Intergenic	-26054	NM_001195632	330914	Mm.46683	NM_177379	ENSMUSG00000041444	Arhgap32	3426406O18Rik|Gc-gap|Grit|Px-rics|Rics|mKIAA0712|p200Rhogap|p250Gap	Rho GTPase activating protein 32	protein-coding
chrX_49407709_49408029	chrX	49407710	49408029	+	0.725983	NA	Intergenic	B3A|SINE|B2	-62581	NM_001081123	75404	Mm.44305	NM_001081123	ENSMUSG00000036198	Arhgap36	1100001E04Rik|rho-gap	Rho GTPase activating protein 36	protein-coding
chr12_52382864_52383480	chr12	52382865	52383480	+	0.668193	NA	Intergenic	Intergenic	-132905	NM_009706	11855	Mm.35059	NM_009706	ENSMUSG00000035133	Arhgap5	p190-B|p190B	Rho GTPase activating protein 5	protein-coding
chrX_169054441_169054851	chrX	169054442	169054851	+	0.777629	NA	intron (NR_109847, intron 1 of 14)	intron (NR_109847, intron 1 of 14)	18035	NR_109847	11856	Mm.441810	NM_009707	ENSMUSG00000031355	Arhgap6	AI504284|RhoGAPX-1	Rho GTPase activating protein 6	protein-coding
chr8_3408998_3409450	chr8	3408999	3409450	+	0.702332	NA	intron (NM_133962, intron 1 of 19)	RSINE1|SINE|B4	16216	NM_133962	102098	Mm.170461	NM_133962	ENSMUSG00000004568	Arhgef18	AI467246|D030053O22Rik	rho/rac guanine nucleotide exchange factor (GEF) 18	protein-coding
chr3_88625051_88625386	chr3	88625052	88625386	+	0.965667	NA	intron (NM_001198913, intron 1 of 21)	intron (NM_001198913, intron 1 of 21)	3825	NM_001198912	16800	Mm.239329	NM_008487	ENSMUSG00000028059	Arhgef2	AA408978|GEF|GEF-H1|GEFH1|LFP40|Lbcl1|Lfc|P40|mKIAA0651	rho/rac guanine nucleotide exchange factor (GEF) 2	protein-coding
chr3_88619744_88620891	chr3	88619745	88620891	+	0.757571	NA	promoter-TSS (NM_008487)	promoter-TSS (NM_008487)	-788	NM_008487	16800	Mm.239329	NM_008487	ENSMUSG00000028059	Arhgef2	AA408978|GEF|GEF-H1|GEFH1|LFP40|Lbcl1|Lfc|P40|mKIAA0651	rho/rac guanine nucleotide exchange factor (GEF) 2	protein-coding
chr13_97903196_97903985	chr13	97903197	97903985	+	0.711903	NA	intron (NM_012026, intron 35 of 35)	intron (NM_012026, intron 35 of 35)	302574	NM_012026	110596	Mm.252718	NM_012026	ENSMUSG00000021662	Arhgef28	9230110L08Rik|AI323540|D13Bwg1089e|RIP2|Rgnef|RhoGEF|Rhoip2|p190RhoGEF	Rho guanine nucleotide exchange factor (GEF) 28	protein-coding
chr14_27376063_27376726	chr14	27376064	27376726	+	1.44089	NA	intron (NM_027871, intron 3 of 10)	intron (NM_027871, intron 3 of 10)	15006	NM_001289688	71704	Mm.248606	NM_027871	ENSMUSG00000021895	Arhgef3	1200004I24Rik|9830169H03Rik|C76747|Xpln	Rho guanine nucleotide exchange factor (GEF) 3	protein-coding
chr14_27303776_27304094	chr14	27303777	27304094	+	1.2152	NA	intron (NM_027871, intron 2 of 10)	PB1D10|SINE|Alu	-32102	NM_001289687	71704	Mm.248606	NM_027871	ENSMUSG00000021895	Arhgef3	1200004I24Rik|9830169H03Rik|C76747|Xpln	Rho guanine nucleotide exchange factor (GEF) 3	protein-coding
chr14_27308483_27309155	chr14	27308484	27309155	+	1.0789	NA	intron (NM_027871, intron 2 of 10)	intron (NM_027871, intron 2 of 10)	-27218	NM_001289687	71704	Mm.248606	NM_027871	ENSMUSG00000021895	Arhgef3	1200004I24Rik|9830169H03Rik|C76747|Xpln	Rho guanine nucleotide exchange factor (GEF) 3	protein-coding
chr14_27234223_27234644	chr14	27234224	27234644	+	0.943131	NA	intron (NM_001289686, intron 3 of 12)	intron (NM_001289686, intron 3 of 12)	-3576	NM_027871	71704	Mm.248606	NM_027871	ENSMUSG00000021895	Arhgef3	1200004I24Rik|9830169H03Rik|C76747|Xpln	Rho guanine nucleotide exchange factor (GEF) 3	protein-coding
chr14_27198443_27199168	chr14	27198444	27199168	+	0.938251	NA	intron (NM_001289686, intron 2 of 12)	B1_Mur4|SINE|Alu	-39204	NM_027871	71704	Mm.248606	NM_027871	ENSMUSG00000021895	Arhgef3	1200004I24Rik|9830169H03Rik|C76747|Xpln	Rho guanine nucleotide exchange factor (GEF) 3	protein-coding
chr14_27198447_27199846	chr14	27198448	27199846	+	0.886026	NA	intron (NM_001289686, intron 2 of 12)	intron (NM_001289686, intron 2 of 12)	-38863	NM_027871	71704	Mm.248606	NM_027871	ENSMUSG00000021895	Arhgef3	1200004I24Rik|9830169H03Rik|C76747|Xpln	Rho guanine nucleotide exchange factor (GEF) 3	protein-coding
chr14_27123464_27123984	chr14	27123465	27123984	+	0.869866	NA	Intergenic	Intergenic	-20269	NM_001289686	71704	Mm.248606	NM_027871	ENSMUSG00000021895	Arhgef3	1200004I24Rik|9830169H03Rik|C76747|Xpln	Rho guanine nucleotide exchange factor (GEF) 3	protein-coding
chr14_27303329_27303696	chr14	27303330	27303696	+	0.868175	NA	intron (NM_027871, intron 2 of 10)	intron (NM_027871, intron 2 of 10)	-32524	NM_001289687	71704	Mm.248606	NM_027871	ENSMUSG00000021895	Arhgef3	1200004I24Rik|9830169H03Rik|C76747|Xpln	Rho guanine nucleotide exchange factor (GEF) 3	protein-coding
chr14_27304499_27304746	chr14	27304500	27304746	+	0.781592	NA	intron (NM_027871, intron 2 of 10)	intron (NM_027871, intron 2 of 10)	-31414	NM_001289687	71704	Mm.248606	NM_027871	ENSMUSG00000021895	Arhgef3	1200004I24Rik|9830169H03Rik|C76747|Xpln	Rho guanine nucleotide exchange factor (GEF) 3	protein-coding
chr14_27304396_27304760	chr14	27304397	27304760	+	0.743032	NA	intron (NM_027871, intron 2 of 10)	intron (NM_027871, intron 2 of 10)	-31459	NM_001289687	71704	Mm.248606	NM_027871	ENSMUSG00000021895	Arhgef3	1200004I24Rik|9830169H03Rik|C76747|Xpln	Rho guanine nucleotide exchange factor (GEF) 3	protein-coding
chr14_27344948_27345560	chr14	27344949	27345560	+	0.688268	NA	intron (NM_001289687, intron 1 of 9)	intron (NM_001289687, intron 1 of 9)	9217	NM_001289687	71704	Mm.248606	NM_027871	ENSMUSG00000021895	Arhgef3	1200004I24Rik|9830169H03Rik|C76747|Xpln	Rho guanine nucleotide exchange factor (GEF) 3	protein-coding
chr14_27236531_27236801	chr14	27236532	27236801	+	0.687183	NA	intron (NM_001289686, intron 3 of 12)	intron (NM_001289686, intron 3 of 12)	-1344	NM_027871	71704	Mm.248606	NM_027871	ENSMUSG00000021895	Arhgef3	1200004I24Rik|9830169H03Rik|C76747|Xpln	Rho guanine nucleotide exchange factor (GEF) 3	protein-coding
chr14_27268105_27268729	chr14	27268106	27268729	+	0.640237	NA	intron (NM_027871, intron 2 of 10)	intron (NM_027871, intron 2 of 10)	30407	NM_027871	71704	Mm.248606	NM_027871	ENSMUSG00000021895	Arhgef3	1200004I24Rik|9830169H03Rik|C76747|Xpln	Rho guanine nucleotide exchange factor (GEF) 3	protein-coding
chrX_57282216_57282632	chrX	57282217	57282632	+	0.699884	NA	intron (NM_152801, intron 6 of 21)	intron (NM_152801, intron 6 of 21)	56305	NM_152801	73341	Mm.261443	NM_152801	ENSMUSG00000031133	Arhgef6	1600028C08Rik|1700038J06Rik|4930592P22Rik|alpha-PIX	Rac/Cdc42 guanine nucleotide exchange factor (GEF) 6	protein-coding
chrX_95161004_95161287	chrX	95161005	95161287	+	1.14909	NA	intron (NM_001290384, intron 1 of 9)	intron (NM_001290384, intron 1 of 9)	5393	NM_001290385	236915	Mm.44841	NM_001033329	ENSMUSG00000025656	Arhgef9	9630036L12Rik|A230067K14|mKIAA0424	CDC42 guanine nucleotide exchange factor (GEF) 9	protein-coding
chrX_95164181_95164470	chrX	95164182	95164470	+	0.778179	NA	intron (NM_001290384, intron 1 of 9)	intron (NM_001290384, intron 1 of 9)	2213	NM_001290385	236915	Mm.44841	NM_001033329	ENSMUSG00000025656	Arhgef9	9630036L12Rik|A230067K14|mKIAA0424	CDC42 guanine nucleotide exchange factor (GEF) 9	protein-coding
chr17_4991705_4992271	chr17	4991706	4992271	+	1.31536	NA	Intergenic	Intergenic	-3086	NM_001085355	239985	Mm.133401	NM_001085355	ENSMUSG00000069729	Arid1b	8030481M12|9330189K18Rik|AI836955|Ardi1b|B230217J03Rik|mKIAA1235	AT rich interactive domain 1B (SWI-like)	protein-coding
chr17_5094651_5095085	chr17	5094652	5095085	+	0.960362	NA	intron (NM_001085355, intron 2 of 19)	intron (NM_001085355, intron 2 of 19)	99794	NM_001085355	239985	Mm.133401	NM_001085355	ENSMUSG00000069729	Arid1b	8030481M12|9330189K18Rik|AI836955|Ardi1b|B230217J03Rik|mKIAA1235	AT rich interactive domain 1B (SWI-like)	protein-coding
chr17_4767854_4768348	chr17	4767855	4768348	+	0.775277	NA	Intergenic	MTC|LTR|ERVL-MaLR	-226973	NM_001085355	239985	Mm.133401	NM_001085355	ENSMUSG00000069729	Arid1b	8030481M12|9330189K18Rik|AI836955|Ardi1b|B230217J03Rik|mKIAA1235	AT rich interactive domain 1B (SWI-like)	protein-coding
chr17_5030874_5031221	chr17	5030875	5031221	+	0.686312	NA	intron (NM_001085355, intron 1 of 19)	intron (NM_001085355, intron 1 of 19)	35974	NM_001085355	239985	Mm.133401	NM_001085355	ENSMUSG00000069729	Arid1b	8030481M12|9330189K18Rik|AI836955|Ardi1b|B230217J03Rik|mKIAA1235	AT rich interactive domain 1B (SWI-like)	protein-coding
chr15_96331534_96331833	chr15	96331535	96331833	+	0.739769	NA	intron (NM_175251, intron 3 of 20)	intron (NM_175251, intron 3 of 20)	44162	NM_175251	77044	Mm.17166	NM_175251	ENSMUSG00000033237	Arid2	1700124K17Rik|4432409D24Rik|zipzap/p200	AT rich interactive domain 2 (ARID, RFX-like)	protein-coding
chr9_57813262_57813626	chr9	57813263	57813626	+	0.632459	NA	intron (NM_019689, intron 1 of 7)	intron (NM_019689, intron 1 of 7)	20790	NM_019689	56380	Mm.425588	NM_019689	ENSMUSG00000004661	Arid3b	Bdp|Dri2	AT rich interactive domain 3B (BRIGHT-like)	protein-coding
chr12_71045024_71045286	chr12	71045025	71045286	+	0.980686	NA	intron (NM_001081195, intron 9 of 23)	intron (NM_001081195, intron 9 of 23)	29188	NM_001081195	238247	Mm.241601	NM_001081195	ENSMUSG00000048118	Arid4a	A630009N03|A630067N03Rik|MmRBBP1|Rbbp1	AT rich interactive domain 4A (RBP1-like)	protein-coding
chr12_71049603_71049919	chr12	71049604	71049919	+	0.801671	NA	intron (NM_001081195, intron 11 of 23)	intron (NM_001081195, intron 11 of 23)	33794	NM_001081195	238247	Mm.241601	NM_001081195	ENSMUSG00000048118	Arid4a	A630009N03|A630067N03Rik|MmRBBP1|Rbbp1	AT rich interactive domain 4A (RBP1-like)	protein-coding
chr12_71020797_71021155	chr12	71020798	71021155	+	0.780474	NA	intron (NM_001081195, intron 3 of 23)	intron (NM_001081195, intron 3 of 23)	5009	NM_001081195	238247	Mm.241601	NM_001081195	ENSMUSG00000048118	Arid4a	A630009N03|A630067N03Rik|MmRBBP1|Rbbp1	AT rich interactive domain 4A (RBP1-like)	protein-coding
chr1_36325717_36326458	chr1	36325718	36326458	+	1.37263	NA	Intergenic	Intergenic	18355	NM_001172205	214855	Mm.34316	NM_145996	ENSMUSG00000037447	Arid5a	D430024K22Rik|Mrf1	AT rich interactive domain 5A (MRF1-like)	protein-coding
chr1_36325351_36326491	chr1	36325352	36326491	+	1.22292	NA	Intergenic	Intergenic	18188	NM_001172205	214855	Mm.34316	NM_145996	ENSMUSG00000037447	Arid5a	D430024K22Rik|Mrf1	AT rich interactive domain 5A (MRF1-like)	protein-coding
chr1_36293923_36294167	chr1	36293924	36294167	+	0.887218	NA	Intergenic	L1MEd|LINE|L1	-13688	NM_001290727	214855	Mm.34316	NM_145996	ENSMUSG00000037447	Arid5a	D430024K22Rik|Mrf1	AT rich interactive domain 5A (MRF1-like)	protein-coding
chr10_68136510_68137913	chr10	68136511	68137913	+	0.921369	NA	intron (NM_023598, intron 4 of 9)	intron (NM_023598, intron 4 of 9)	141514	NM_023598	71371	Mm.440357	NM_023598	ENSMUSG00000019947	Arid5b	4930580B11|5430435G07Rik|AI467247|Desrt|Mrf2|Mrf2alpha|Mrf2beta	AT rich interactive domain 5B (MRF1-like)	protein-coding
chr9_108643308_108643742	chr9	108643309	108643742	+	0.860611	NA	intron (NM_011790, intron 3 of 15)	intron (NM_011790, intron 3 of 15)	5855	NM_011790	23807	Mm.290447	NM_011790	ENSMUSG00000064145	Arih2	AI843547|ARI2|TRIAD1|UIP48	ariadne homolog 2 (Drosophila)	protein-coding
chr13_54570190_54570449	chr13	54570191	54570449	+	0.918542	NA	Intergenic	Intergenic	-4693	NM_019968	56795	Mm.89484	NM_019968	ENSMUSG00000025870	Arl10	Arl10a|Arm1	ADP-ribosylation factor-like 10	protein-coding
chr3_69182338_69182751	chr3	69182339	69182751	+	1.45695	NA	Intergenic	Intergenic	-39874	NM_027843	71619	Mm.98122	NM_027843	ENSMUSG00000098207	Arl14	9130014L17Rik|Arf7	ADP-ribosylation factor-like 14	protein-coding
chr2_107005602_107006246	chr2	107005603	107006246	+	0.682508	NA	Intergenic	ERVB4_3-LTR_MM|LTR|ERVK	-31527	NM_001025102	212772	Mm.381231	NM_173750	ENSMUSG00000027122	Arl14ep	2700007P21Rik|4930448O08Rik|ARF7EP	ADP-ribosylation factor-like 14 effector protein	protein-coding
chr13_113829088_113829417	chr13	113829089	113829417	+	0.766295	NA	intron (NM_172595, intron 1 of 4)	LTR16B1|LTR|ERVL	34745	NM_172595	218639	Mm.79837	NM_172595	ENSMUSG00000042348	Arl15	A430036I03|Arfrp2|C230032K13Rik	ADP-ribosylation factor-like 15	protein-coding
chr13_113828663_113829539	chr13	113828664	113829539	+	0.727642	NA	intron (NM_172595, intron 1 of 4)	intron (NM_172595, intron 1 of 4)	34593	NM_172595	218639	Mm.79837	NM_172595	ENSMUSG00000042348	Arl15	A430036I03|Arfrp2|C230032K13Rik	ADP-ribosylation factor-like 15	protein-coding
chr12_39648944_39649351	chr12	39648945	39649351	+	1.24214	NA	Intergenic	Intergenic	388228	NM_007487	11861	Mm.12723	NM_007487	ENSMUSG00000047446	Arl4a	AI467555|Arl4	ADP-ribosylation factor-like 4A	protein-coding
chr12_40009868_40010305	chr12	40009869	40010305	+	1.13031	NA	Intergenic	Intergenic	27289	NM_007487	11861	Mm.12723	NM_007487	ENSMUSG00000047446	Arl4a	AI467555|Arl4	ADP-ribosylation factor-like 4A	protein-coding
chr12_40008253_40008826	chr12	40008254	40008826	+	1.08173	NA	Intergenic	RCHARR1|DNA|hAT-Charlie	28836	NM_007487	11861	Mm.12723	NM_007487	ENSMUSG00000047446	Arl4a	AI467555|Arl4	ADP-ribosylation factor-like 4A	protein-coding
chr1_88639761_88640206	chr1	88639762	88640206	+	0.848523	NA	Intergenic	Intergenic	62207	NM_177305	320982	Mm.27968	NM_177305	ENSMUSG00000049866	Arl4c	A630084M22Rik|Arl7|LAK	ADP-ribosylation factor-like 4C	protein-coding
chr2_52420032_52420305	chr2	52420033	52420305	+	0.764902	NA	intron (NM_182994, intron 1 of 5)	intron (NM_182994, intron 1 of 5)	4705	NM_182994	75423	Mm.314378	NM_182994	ENSMUSG00000036093	Arl5a	2410015N24Rik|2810410P22Rik|AA408731|AW610751|Arl5|T25534	ADP-ribosylation factor-like 5A	protein-coding
chr7_118135319_118136026	chr7	118135320	118136026	+	1.85726	NA	intron (NM_001031814, intron 62 of 62)	intron (NM_001031814, intron 62 of 62)	-6048	NM_019419	54208	Mm.29924	NM_019419	ENSMUSG00000030654	Arl6ip1	AIP-6|AL022945|ARMER|AU042858|Aip-1|Arl6ip|C85138|mKIAA0069	ADP-ribosylation factor-like 6 interacting protein 1	protein-coding
chr7_118136090_118136582	chr7	118136091	118136582	+	1.35054	NA	intron (NM_001031814, intron 62 of 62)	intron (NM_001031814, intron 62 of 62)	-6711	NM_019419	54208	Mm.29924	NM_019419	ENSMUSG00000030654	Arl6ip1	AIP-6|AL022945|ARMER|AU042858|Aip-1|Arl6ip|C85138|mKIAA0069	ADP-ribosylation factor-like 6 interacting protein 1	protein-coding
chr7_118141217_118141922	chr7	118141218	118141922	+	0.980539	NA	intron (NM_001031814, intron 56 of 62)	intron (NM_001031814, intron 56 of 62)	-11945	NM_019419	54208	Mm.29924	NM_019419	ENSMUSG00000030654	Arl6ip1	AIP-6|AL022945|ARMER|AU042858|Aip-1|Arl6ip|C85138|mKIAA0069	ADP-ribosylation factor-like 6 interacting protein 1	protein-coding
chr7_118185954_118186400	chr7	118185955	118186400	+	0.815585	NA	intron (NM_001031814, intron 18 of 62)	intron (NM_001031814, intron 18 of 62)	-56552	NM_019419	54208	Mm.29924	NM_019419	ENSMUSG00000030654	Arl6ip1	AIP-6|AL022945|ARMER|AU042858|Aip-1|Arl6ip|C85138|mKIAA0069	ADP-ribosylation factor-like 6 interacting protein 1	protein-coding
chr7_118185950_118186217	chr7	118185951	118186217	+	0.796634	NA	exon (NM_001031814, exon 19 of 63)	exon (NM_001031814, exon 19 of 63)	-56459	NM_019419	54208	Mm.29924	NM_019419	ENSMUSG00000030654	Arl6ip1	AIP-6|AL022945|ARMER|AU042858|Aip-1|Arl6ip|C85138|mKIAA0069	ADP-ribosylation factor-like 6 interacting protein 1	protein-coding
chr6_97209325_97209535	chr6	97209326	97209535	+	0.754272	NA	Intergenic	B3|SINE|B2	-1362	NM_022992	65106	Mm.291014	NM_022992	ENSMUSG00000035199	Arl6ip5	5930404D22Rik|AV001879|Aip-5|Gtrap3-18|addiscin	ADP-ribosylation factor-like 6 interacting protein 5	protein-coding
chr10_41978160_41979234	chr10	41978161	41979234	+	1.36607	NA	intron (NM_001034858, intron 6 of 17)	intron (NM_001034858, intron 6 of 17)	39685	NM_001034858	213402	Mm.211320	NM_001034858	ENSMUSG00000071324	Armc2	2610018I05Rik	armadillo repeat containing 2	protein-coding
chr10_42033604_42034139	chr10	42033605	42034139	+	0.973107	NA	Intergenic	MLT1L|LTR|ERVL-MaLR	-15490	NM_001034858	213402	Mm.211320	NM_001034858	ENSMUSG00000071324	Armc2	2610018I05Rik	armadillo repeat containing 2	protein-coding
chr10_41984057_41984697	chr10	41984058	41984697	+	0.968212	NA	intron (NM_001034858, intron 5 of 17)	L3|LINE|CR1	34005	NM_001034858	213402	Mm.211320	NM_001034858	ENSMUSG00000071324	Armc2	2610018I05Rik	armadillo repeat containing 2	protein-coding
chr10_42130489_42130833	chr10	42130490	42130833	+	0.71444	NA	Intergenic	Intergenic	-112279	NM_001034858	213402	Mm.211320	NM_001034858	ENSMUSG00000071324	Armc2	2610018I05Rik	armadillo repeat containing 2	protein-coding
chr7_84420669_84420943	chr7	84420670	84420943	+	0.633861	NA	Intergenic	Intergenic	-10768	NM_007488	11864	Mm.38594	NM_007488	ENSMUSG00000015709	Arnt2	Hif-2b|bHLHe1|mKIAA0307	aryl hydrocarbon receptor nuclear translocator 2	protein-coding
chr7_113183775_113184338	chr7	113183776	113184338	+	1.05076	NA	Intergenic	B3A|SINE|B2	-23408	NM_001243048	11865	Mm.440371	NM_007489	ENSMUSG00000055116	Arntl	Arnt3|BMAL1b|Bmal1|MOP3|bHLHe5|bmal1b'	aryl hydrocarbon receptor nuclear translocator-like	protein-coding
chr7_113183775_113184565	chr7	113183776	113184565	+	0.884382	NA	Intergenic	B3A|SINE|B2	-23295	NM_001243048	11865	Mm.440371	NM_007489	ENSMUSG00000055116	Arntl	Arnt3|BMAL1b|Bmal1|MOP3|bHLHe5|bmal1b'	aryl hydrocarbon receptor nuclear translocator-like	protein-coding
chr6_146813007_146813689	chr6	146813008	146813689	+	1.5724	NA	intron (NM_001289681, intron 5 of 14)	intron (NM_001289681, intron 5 of 14)	7818	NM_001289681	272322	Mm.333500	NM_172309	ENSMUSG00000040187	Arntl2	4632430A05Rik|BMAL2|CLIF|MOP9|bHLHe6	aryl hydrocarbon receptor nuclear translocator-like 2	protein-coding
chr6_146776691_146776926	chr6	146776692	146776926	+	0.99405	NA	3' UTR (NM_172734, exon 14 of 14)	3' UTR (NM_172734, exon 14 of 14)	-28721	NM_172309	272322	Mm.333500	NM_172309	ENSMUSG00000040187	Arntl2	4632430A05Rik|BMAL2|CLIF|MOP9|bHLHe6	aryl hydrocarbon receptor nuclear translocator-like 2	protein-coding
chr6_146776546_146777276	chr6	146776547	146777276	+	0.946841	NA	3' UTR (NM_172734, exon 14 of 14)	3' UTR (NM_172734, exon 14 of 14)	-28619	NM_172309	272322	Mm.333500	NM_172309	ENSMUSG00000040187	Arntl2	4632430A05Rik|BMAL2|CLIF|MOP9|bHLHe6	aryl hydrocarbon receptor nuclear translocator-like 2	protein-coding
chr6_146793587_146793908	chr6	146793588	146793908	+	0.782121	NA	Intergenic	Intergenic	-11782	NM_172309	272322	Mm.333500	NM_172309	ENSMUSG00000040187	Arntl2	4632430A05Rik|BMAL2|CLIF|MOP9|bHLHe6	aryl hydrocarbon receptor nuclear translocator-like 2	protein-coding
chr13_80864230_80864545	chr13	80864231	80864545	+	0.749252	NA	Intergenic	Intergenic	-19034	NM_001042591	105171	Mm.423137	NM_001042591	ENSMUSG00000074794	Arrdc3	AI450344|mKIAA1376	arrestin domain containing 3	protein-coding
chr5_92336830_92337400	chr5	92336831	92337400	+	0.926625	NA	intron (NM_181728, intron 2 of 9)	L1M4c|LINE|L1	5274	NM_181728	109979	Mm.263514	NM_181728	ENSMUSG00000034842	Art3	4930569O04Rik|ARTC3	ADP-ribosyltransferase 3	protein-coding
chr6_136852132_136852567	chr6	136852133	136852567	+	0.930568	NA	intron (NM_026639, intron 2 of 2)	L2a|LINE|L2	5250	NM_026639	109978	Mm.31840	NM_026639	ENSMUSG00000030217	Art4	4432404K01Rik|ARTC4|DO|DOK1	ADP-ribosyltransferase 4	protein-coding
chr4_117981148_117981894	chr4	117981149	117981894	+	0.780477	NA	intron (NM_001285521, intron 4 of 10)	intron (NM_001285521, intron 4 of 10)	-51758	NM_001284192	11876	Mm.56897	NM_009711	ENSMUSG00000028539	Artn	neublastin	artemin	protein-coding
chr4_117926459_117927375	chr4	117926460	117927375	+	0.610914	NA	exon (NM_001284193, exon 5 of 5)	exon (NM_001284193, exon 5 of 5)	2846	NM_001284191	11876	Mm.56897	NM_009711	ENSMUSG00000028539	Artn	neublastin	artemin	protein-coding
chr19_32120532_32121195	chr19	32120533	32121195	+	1.04507	NA	Intergenic	Intergenic	-17724	NM_018830	54447	Mm.491229	NM_018830	ENSMUSG00000024887	Asah2	AI585898	N-acylsphingosine amidohydrolase 2	protein-coding
chr19_32113001_32113402	chr19	32113002	32113402	+	0.729525	NA	Intergenic	Intergenic	-10062	NM_018830	54447	Mm.491229	NM_018830	ENSMUSG00000024887	Asah2	AI585898	N-acylsphingosine amidohydrolase 2	protein-coding
chr19_32147522_32148033	chr19	32147523	32148033	+	0.722623	NA	intron (NM_001168526, intron 2 of 5)	MTC|LTR|ERVL-MaLR	-44638	NM_018830	54447	Mm.491229	NM_018830	ENSMUSG00000024887	Asah2	AI585898	N-acylsphingosine amidohydrolase 2	protein-coding
chr15_64235588_64236153	chr15	64235589	64236153	+	1.34086	NA	intron (NM_001276462, intron 1 of 27)	intron (NM_001276462, intron 1 of 27)	76802	NM_001276462	13196	Mm.277236	NM_010026	ENSMUSG00000022377	Asap1	AV239055|DEF-1|Ddef1|PAP|mKIAA1249|s19	ArfGAP with SH3 domain, ankyrin repeat and PH domain1	protein-coding
chr15_64211433_64211849	chr15	64211434	64211849	+	1.10293	NA	intron (NM_001276462, intron 1 of 27)	intron (NM_001276462, intron 1 of 27)	101032	NM_001276462	13196	Mm.277236	NM_010026	ENSMUSG00000022377	Asap1	AV239055|DEF-1|Ddef1|PAP|mKIAA1249|s19	ArfGAP with SH3 domain, ankyrin repeat and PH domain1	protein-coding
chr15_64477093_64477774	chr15	64477094	64477774	+	0.897425	NA	Intergenic	L1MB8|LINE|L1	-94515	NM_010026	13196	Mm.277236	NM_010026	ENSMUSG00000022377	Asap1	AV239055|DEF-1|Ddef1|PAP|mKIAA1249|s19	ArfGAP with SH3 domain, ankyrin repeat and PH domain1	protein-coding
chr15_64250153_64250603	chr15	64250154	64250603	+	0.820982	NA	intron (NM_001276462, intron 1 of 27)	PB1D10|SINE|Alu	62295	NM_001276462	13196	Mm.277236	NM_010026	ENSMUSG00000022377	Asap1	AV239055|DEF-1|Ddef1|PAP|mKIAA1249|s19	ArfGAP with SH3 domain, ankyrin repeat and PH domain1	protein-coding
chr15_64192641_64193223	chr15	64192642	64193223	+	0.789017	NA	intron (NM_001276462, intron 2 of 27)	intron (NM_001276462, intron 2 of 27)	119741	NM_001276462	13196	Mm.277236	NM_010026	ENSMUSG00000022377	Asap1	AV239055|DEF-1|Ddef1|PAP|mKIAA1249|s19	ArfGAP with SH3 domain, ankyrin repeat and PH domain1	protein-coding
chr15_64197056_64197374	chr15	64197057	64197374	+	0.776868	NA	intron (NM_001276462, intron 2 of 27)	intron (NM_001276462, intron 2 of 27)	115458	NM_001276462	13196	Mm.277236	NM_010026	ENSMUSG00000022377	Asap1	AV239055|DEF-1|Ddef1|PAP|mKIAA1249|s19	ArfGAP with SH3 domain, ankyrin repeat and PH domain1	protein-coding
chr15_64284502_64284914	chr15	64284503	64284914	+	0.764941	NA	intron (NM_001276462, intron 1 of 27)	intron (NM_001276462, intron 1 of 27)	27965	NM_001276462	13196	Mm.277236	NM_010026	ENSMUSG00000022377	Asap1	AV239055|DEF-1|Ddef1|PAP|mKIAA1249|s19	ArfGAP with SH3 domain, ankyrin repeat and PH domain1	protein-coding
chr15_64194071_64194348	chr15	64194072	64194348	+	0.727075	NA	intron (NM_001276462, intron 2 of 27)	intron (NM_001276462, intron 2 of 27)	118463	NM_001276462	13196	Mm.277236	NM_010026	ENSMUSG00000022377	Asap1	AV239055|DEF-1|Ddef1|PAP|mKIAA1249|s19	ArfGAP with SH3 domain, ankyrin repeat and PH domain1	protein-coding
chr15_64284312_64284924	chr15	64284313	64284924	+	0.698487	NA	intron (NM_001276462, intron 1 of 27)	intron (NM_001276462, intron 1 of 27)	28055	NM_001276462	13196	Mm.277236	NM_010026	ENSMUSG00000022377	Asap1	AV239055|DEF-1|Ddef1|PAP|mKIAA1249|s19	ArfGAP with SH3 domain, ankyrin repeat and PH domain1	protein-coding
chr14_26919260_26920006	chr14	26919261	26920006	+	1.36349	NA	3' UTR (NM_145221, exon 22 of 22)	3' UTR (NM_145221, exon 22 of 22)	25029	NM_080856	142687	Mm.138259	NM_080856	ENSMUSG00000021898	Asb14	Asb-14	ankyrin repeat and SOCS box-containing 14	protein-coding
chr14_26904406_26904771	chr14	26904407	26904771	+	1.00837	NA	intron (NM_080856, intron 6 of 8)	L1Md_F2|LINE|L1	9985	NM_080856	142687	Mm.138259	NM_080856	ENSMUSG00000021898	Asb14	Asb-14	ankyrin repeat and SOCS box-containing 14	protein-coding
chr12_103346957_103347334	chr12	103346958	103347334	+	0.941427	NA	intron (NM_023049, intron 1 of 9)	intron (NM_023049, intron 1 of 9)	8855	NM_023049	65256	Mm.27159	NM_023049	ENSMUSG00000021200	Asb2	1110008E15Rik	ankyrin repeat and SOCS box-containing 2	protein-coding
chr10_60015752_60016577	chr10	60015753	60016577	+	1.14108	NA	intron (NM_001199187, intron 5 of 10)	B1_Mur4|SINE|Alu	12838	NM_001199187	69090	Mm.155839	NM_026937	ENSMUSG00000044475	Ascc1	1810015P09Rik|AI550520|ASC1p50|CGI-18	activating signal cointegrator 1 complex subunit 1	protein-coding
chr10_50586586_50586900	chr10	50586587	50586900	+	0.975928	NA	Intergenic	Intergenic	-5926	NM_198007	77987	Mm.222497	NM_198007	ENSMUSG00000038774	Ascc3	ASC1p200|B630009I04Rik|BC023451|D430001L07Rik|D630041L21|Helic1|RNAH	activating signal cointegrator 1 complex subunit 3	protein-coding
chr10_53598761_53599175	chr10	53598762	53599175	+	0.704078	NA	intron (NM_025541, intron 1 of 3)	intron (NM_025541, intron 1 of 3)	2007	NM_025541	66403	Mm.272989	NM_025541	ENSMUSG00000019857	Asf1a	2310079C17Rik|C79052	anti-silencing function 1A histone chaperone	protein-coding
chr5_24404740_24405407	chr5	24404741	24405407	+	0.998769	NA	intron (NM_029020, intron 9 of 15)	intron (NM_029020, intron 9 of 15)	-8377	NM_183000	171209	Mm.299636	NM_183000	ENSMUSG00000038276	Asic3	AW742291|Accn3|DRASIC|SLNAC1|TNAC1	acid-sensing (proton-gated) ion channel 3	protein-coding
chr3_81992508_81992983	chr3	81992509	81992983	+	0.695898	NA	Intergenic	X6B_LINE|LINE|CR1	-4176	NM_021370	58170	Mm.88839	NM_021370	ENSMUSG00000028008	Asic5	Accn5|Blinac|Inac	acid-sensing (proton-gated) ion channel family member 5	protein-coding
chr6_7692796_7693519	chr6	7692797	7693519	+	1.3604	NA	promoter-TSS (NM_012055)	promoter-TSS (NM_012055)	24	NM_012055	27053	Mm.2942	NM_012055	ENSMUSG00000029752	Asns	-	asparagine synthetase	protein-coding
chr6_7692545_7693548	chr6	7692546	7693548	+	1.34716	NA	intron (NM_012055, intron 1 of 11)	CpG	135	NM_012055	27053	Mm.2942	NM_012055	ENSMUSG00000029752	Asns	-	asparagine synthetase	protein-coding
chr11_73323998_73324404	chr11	73323999	73324404	+	0.689688	NA	intron (NM_023113, intron 1 of 5)	intron (NM_023113, intron 1 of 5)	436	NM_023113	11484	Mm.293574	NM_023113	ENSMUSG00000020774	Aspa	Acy-2|Acy2|nur7	aspartoacylase	protein-coding
chr7_44462736_44463033	chr7	44462737	44463033	+	0.823799	NA	3' UTR (NM_198250, exon 3 of 3)	3' UTR (NM_198250, exon 3 of 3)	-2550	NM_026690	68352	Mm.88478	NM_026690	ENSMUSG00000038704	Aspdh	0610012D14Rik	aspartate dehydrogenase domain containing	protein-coding
chr4_9605318_9605878	chr4	9605319	9605878	+	1.81246	NA	intron (NM_001177854, intron 3 of 11)	Tigger7|DNA|TcMar-Tigger	38119	NM_001177853	65973	Mm.222206	NM_023066	ENSMUSG00000028207	Asph	2310005F16Rik|3110001L23Rik|AI848629|AW261690|AW561901|BAH|C79816|cI-37	aspartate-beta-hydroxylase	protein-coding
[truncated: 10,624 more rows]

## Sheet: Table S1C
Table S1C HOMER Opening peaks in both Cytokine-primed and Ag-stimulated cells Data is sorted alphabetically by the gene name; Only peaks above the peak score value of 0.5 are shown.
[truncated: 71 more rows]

## Sheet: Table S2A
Table S2A_HOMER Closing peaks in Cytokine-primed cells Data is sorted alphabetically by the gene name; Only peaks above the peak score value of 0.5 are shown.
[truncated: 485 more rows]

[truncated: 11 more sheets: Table S2B, Table S2C, Table S3, Table S4, Table S5A, Table S5B, Table S5C, Table S6A, Table S6B, Table S6C, Table S7]
